# Supplementary material for: Analysis of Virus-Derived siRNAs in Strawberry Plants Co-Infected with Multiple Viruses and Their Genotypes
Source: MDPI journal article supplement (doi:10.3390/plants12132564), 2023-07-06

**Figure S2** Distribution of viral small interfering RNAs (reads) from the Fv-SMoV\_BC\_AC samples.

Plant Fv-SMoV\_BC\_AC-1 - datasets S1, S2

Plant Fv-SMoV\_BC\_AC-2 - datasets S3, S4, S92

Color legends show strand specificity of the mapped reads. Axes of abscissas show genomic position in nucleotides, axes of ordinary – sequence (mapping) coverage.

**Mappings of the S1\_L001 reads against the viral references. *qPCR detection: SMoV RNA1B,C & SMoV RNA2A,C***

| Dataset | Input reads | Virus | Reference  | Mapped reads | Mapped reads, % | RPKM | Forward/Reverse balance | Nonredundant, % | Strain specific | Strain specific, % from total mapped reads | Strain specific, RPKM |
|---------|-------------|-------|------------|--------------|-----------------|------|-------------------------|-----------------|-----------------|--------------------------------------------|-----------------------|
| S1_L001 | 10000000    | SMoV  | SMoV_RNA1A | 2553         | 0.026           | 36.3 | 1.6                     | 42.3            | 5               | 0.2                                        | 0.1                   |

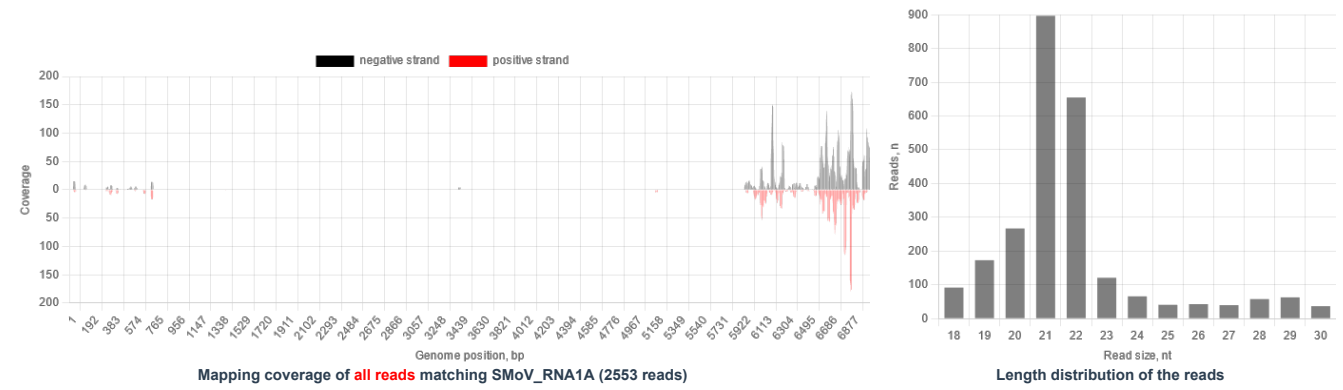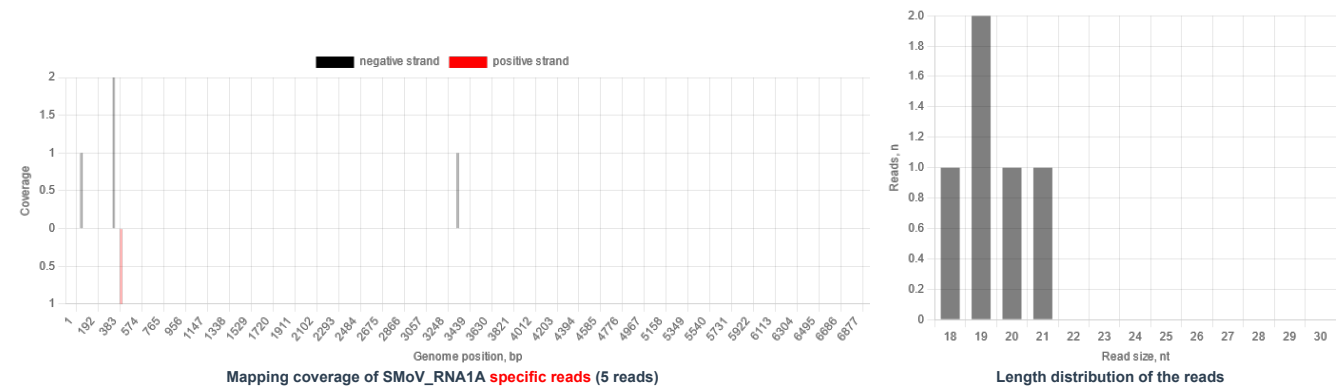

| Dataset | Input reads | Virus | Reference  | Mapped reads | Mapped reads, % | RPKM | Forward/Reverse balance | Nonredundant, % | Strain specific | Strain specific, % from total mapped reads | Strain specific, RPKM |
|---------|-------------|-------|------------|--------------|-----------------|------|-------------------------|-----------------|-----------------|--------------------------------------------|-----------------------|
| S1_L001 | 10000000    | SMoV  | SMoV_RNA1B | 4259         | 0.043           | 60.4 | 1.6                     | 52.3            | 1654            | 38.8                                       | 23.5                  |

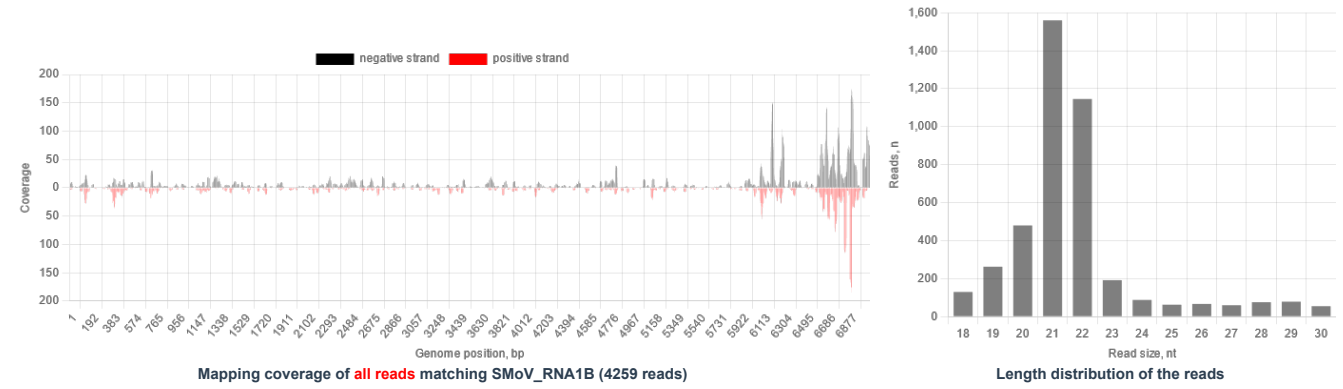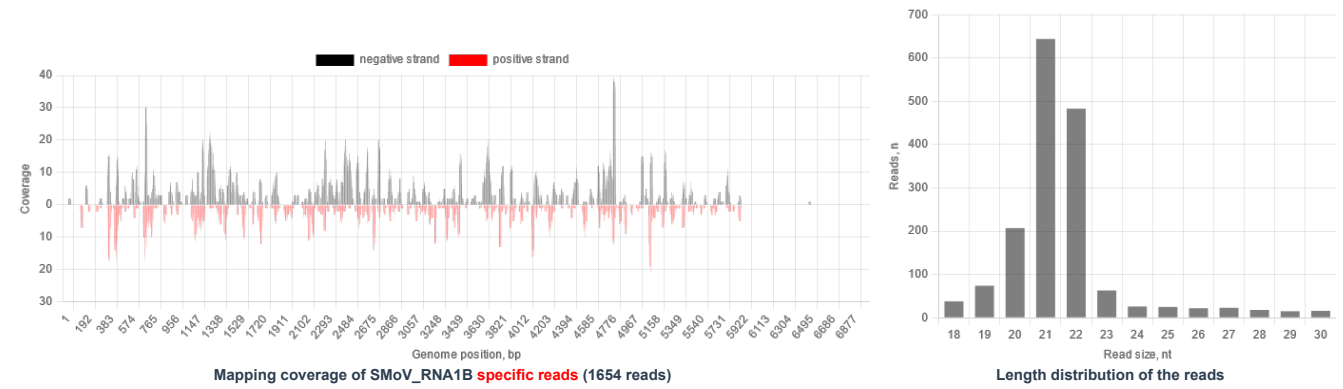

| Dataset | Input reads | Virus | Reference  | Mapped reads | Mapped reads, % | RPKM | Forward/Reverse balance | Nonredundant, % | Strain specific | Strain specific, % from total mapped | Strain specific, RPKM |
|---------|-------------|-------|------------|--------------|-----------------|------|-------------------------|-----------------|-----------------|--------------------------------------|-----------------------|
| S1_L001 | 10000000    | SMoV  | SMoV_RNA1C | 6533         | 0.065           | 92.8 | 1.4                     | 54.3            | 3924            | 60.1                                 | 55.7                  |

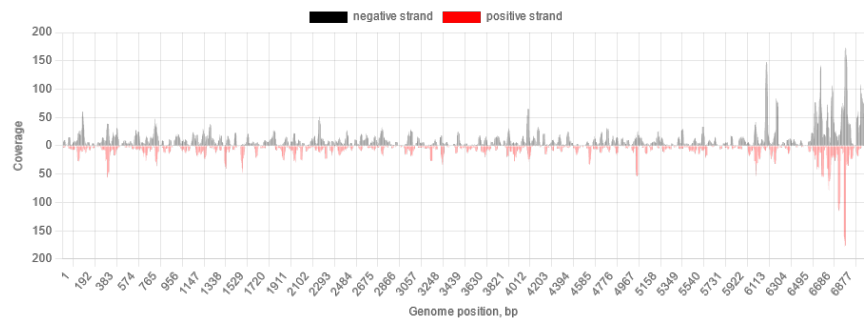

Mapping coverage of **all reads** matching SMoV\_RNA1C (6533 reads)

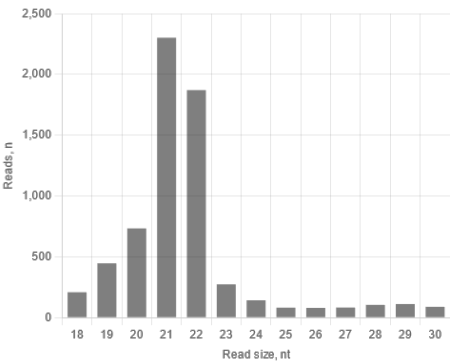

Length distribution of the reads

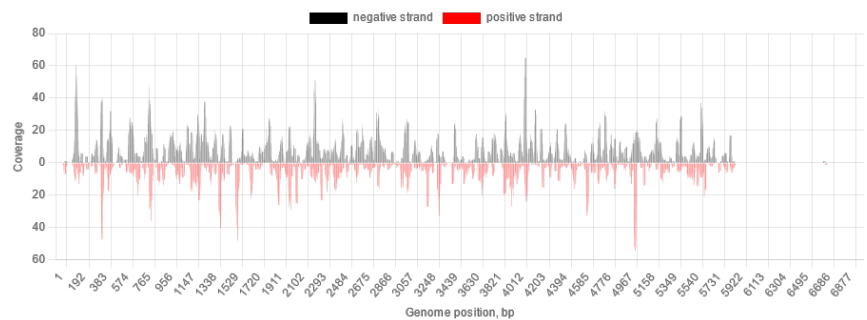

Mapping coverage of SMoV\_RNA1C **specific reads** (3924 reads)

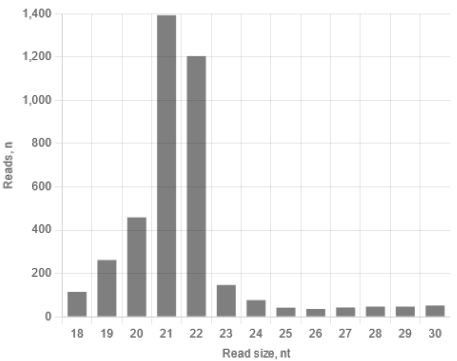

Length distribution of the reads

| Dataset | Input reads | Virus | Reference  | Mapped reads | Mapped reads, % | RPKM | Forward/Reverse balance | Nonredundant, % | Strain specific | Strain specific, % from total mapped | Strain specific, RPKM |
|---------|-------------|-------|------------|--------------|-----------------|------|-------------------------|-----------------|-----------------|--------------------------------------|-----------------------|
| S1_L001 | 10000000    | SMoV  | SMoV_RNA2A | 4707         | 0.047           | 75.1 | 1.7                     | 58.6            | 3373            | 71.7                                 | 53.8                  |

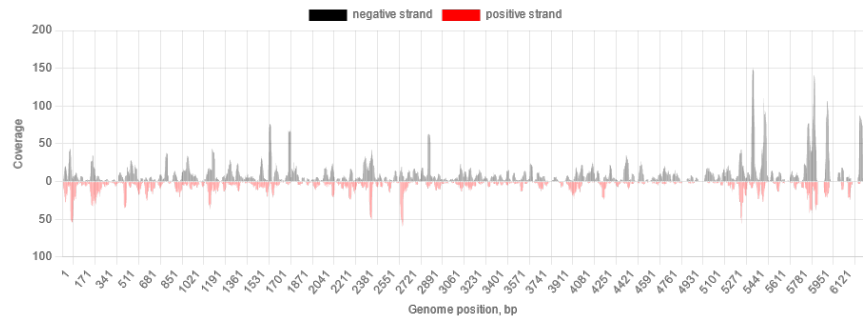

Mapping coverage of **all reads** matching SMoV\_RNA2A (4707 reads)

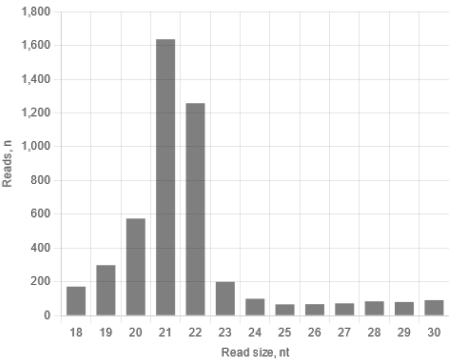

Length distribution of the reads

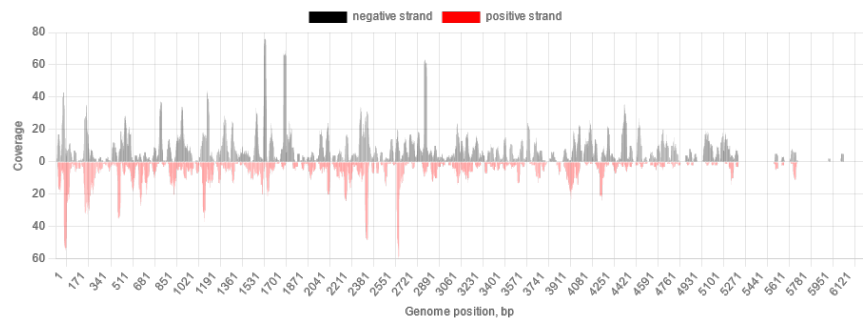

Mapping coverage of SMoV\_RNA2A **specific reads** (3373 reads)

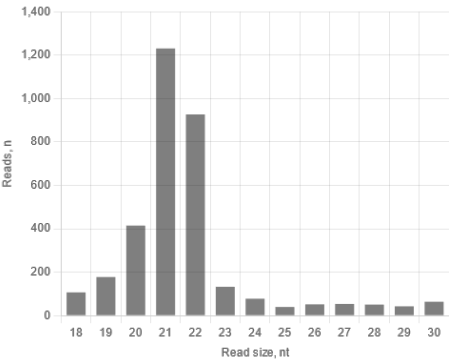

Length distribution of the reads

| Dataset | Input reads | Virus | Reference  | Mapped reads | Mapped reads, % | RPKM | Forward/Reverse balance | Nonredundant, % | Strain specific | Strain specific, % from total mapped reads | Strain specific, RPKM |
|---------|-------------|-------|------------|--------------|-----------------|------|-------------------------|-----------------|-----------------|--------------------------------------------|-----------------------|
| S1_L001 | 10000000    | SMoV  | SMoV_RNA2B | 1338         | 0.013           | 21.2 | 2.1                     | 51.9            | 22              | 1.6                                        | 0.3                   |

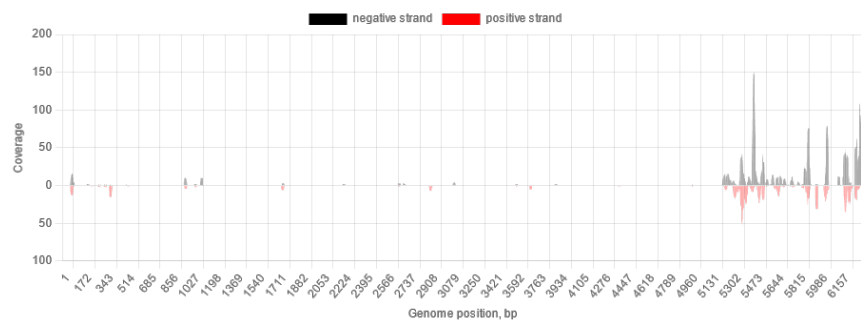

Mapping coverage of all reads matching SMoV\_RNA2B (1338 reads)

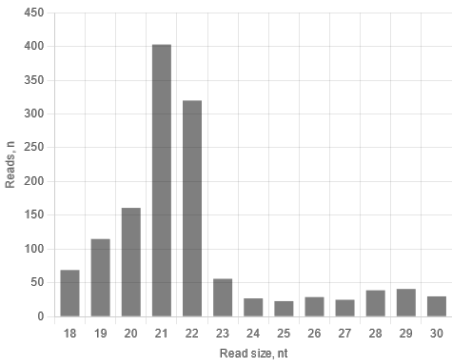

Length distribution of the reads

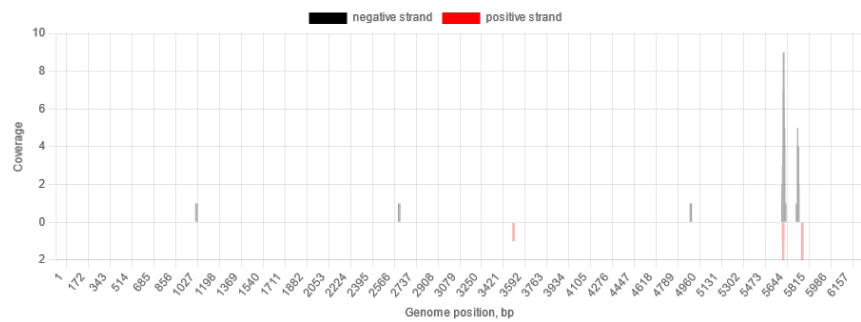

Mapping coverage of SMoV\_RNA2B specific reads (22 reads)

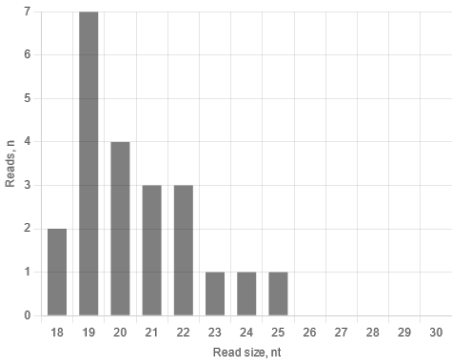

Length distribution of the reads

| Dataset | Input reads | Virus | Reference  | Mapped reads | Mapped reads, % | RPKM | Forward/Reverse balance | Nonredundant, % | Strain specific | Strain specific, % from total mapped reads | Strain specific, RPKM |
|---------|-------------|-------|------------|--------------|-----------------|------|-------------------------|-----------------|-----------------|--------------------------------------------|-----------------------|
| S1_L001 | 10000000    | SMoV  | SMoV_RNA2C | 5494         | 0.055           | 86.7 | 1.5                     | 51.9            | 3052            | 55.6                                       | 48.2                  |

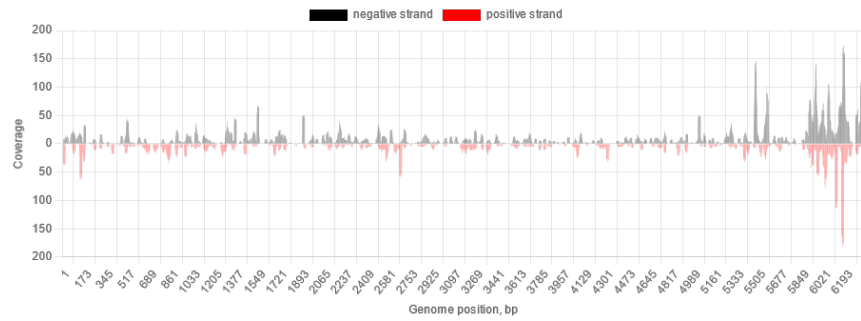

Mapping coverage of all reads matching SMoV\_RNA2C (5494 reads)

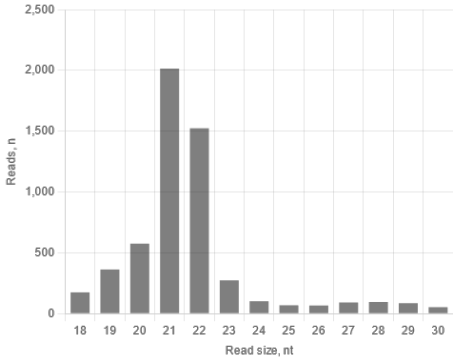

Length distribution of the reads

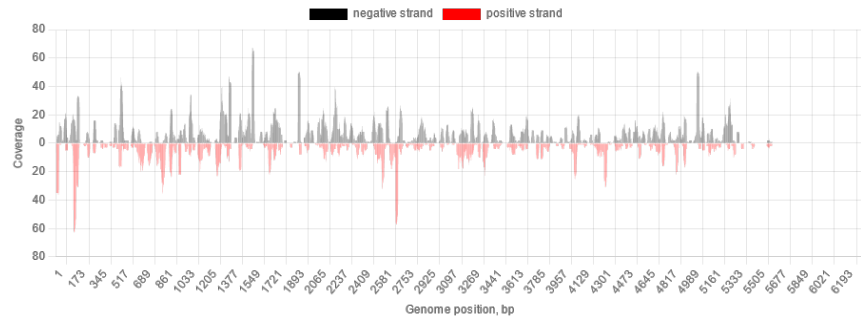

Mapping coverage of SMoV\_RNA2C specific reads (3052 reads)

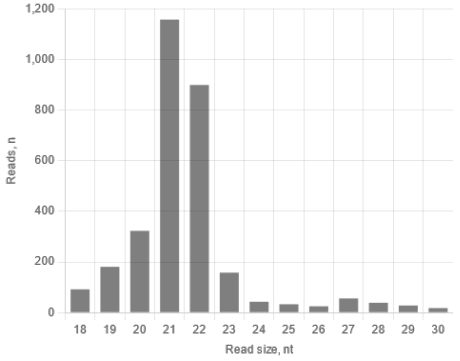

Length distribution of the reads

Mappings of the S2\_L001 reads against the viral references. *qPCR* detection: SMoV RNA1B,C & SMoV RNA2A,C

| Dataset | Input reads | Virus | Reference  | Mapped reads | Mapped reads, % | RPKM | Forward/Reverse balance | Nonredundant, % | Strain specific | Strain specific, % from total mapped reads | Strain specific, RPKM |
|---------|-------------|-------|------------|--------------|-----------------|------|-------------------------|-----------------|-----------------|--------------------------------------------|-----------------------|
| S2_L001 | 10000000    | SMoV  | SMoV_RNA1A | 1629         | 0.016           | 23.2 | 1.8                     | 44.6            | 1654            | 101.5                                      | 0.0                   |

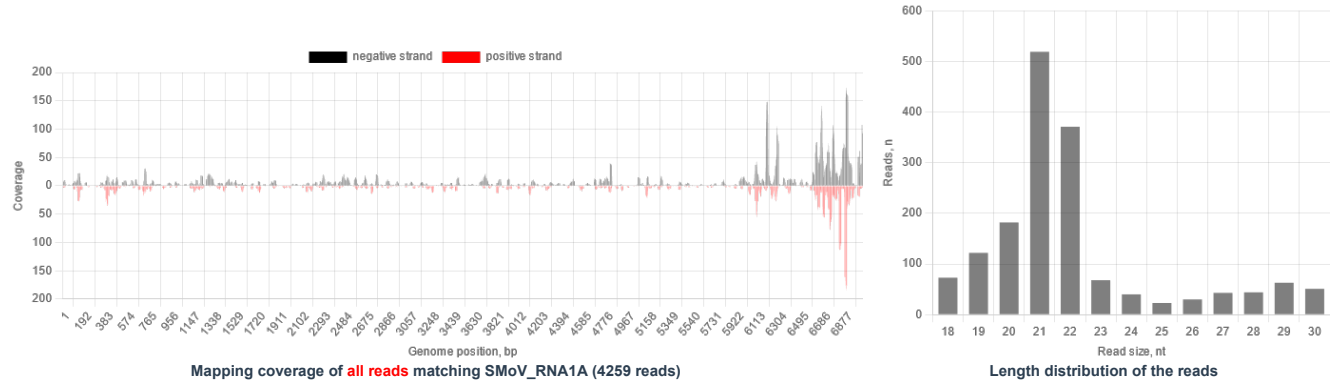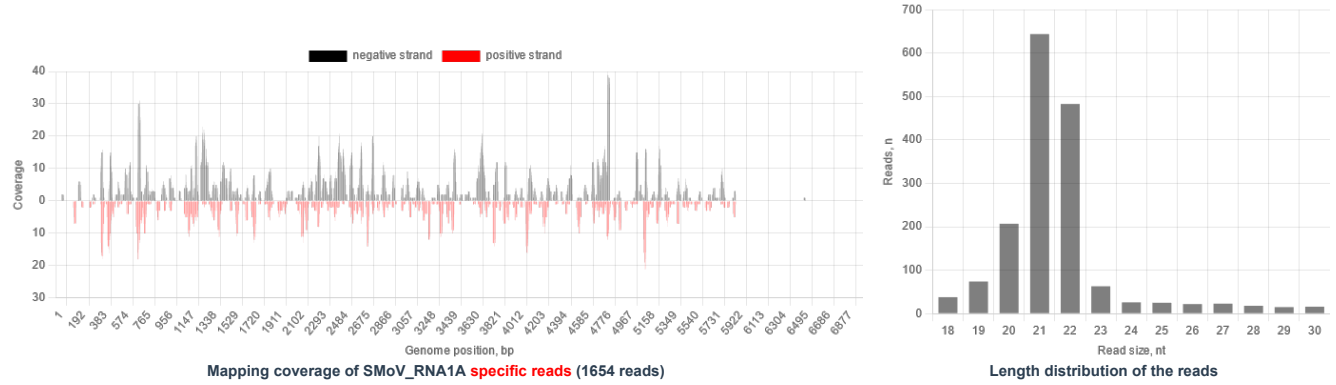

| Dataset | Input reads | Virus | Reference  | Mapped reads | Mapped reads, % | RPKM | Forward/Reverse balance | Nonredundant, % | Strain specific | Strain specific, % from total mapped reads | Strain specific, RPKM |
|---------|-------------|-------|------------|--------------|-----------------|------|-------------------------|-----------------|-----------------|--------------------------------------------|-----------------------|
| S2_L001 | 10000000    | SMoV  | SMoV_RNA1B | 3340         | 0.033           | 47.4 | 1.6                     | 55.5            | 3924            | 117.5                                      | 23.2                  |

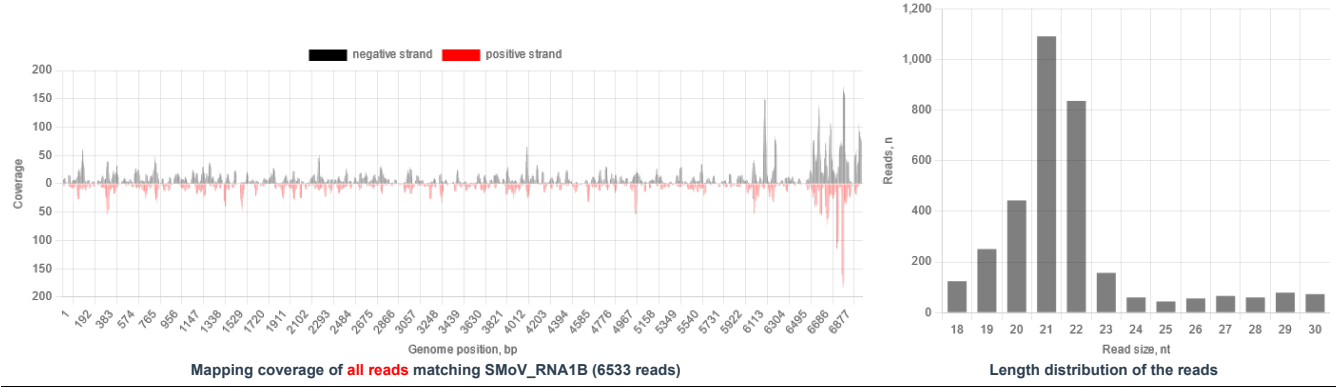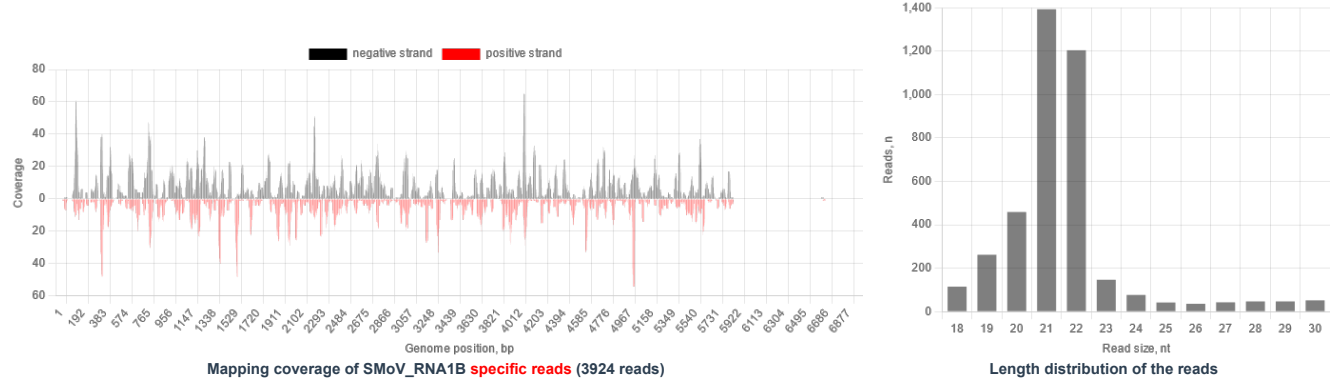

| Dataset | Input reads | Virus | Reference  | Mapped reads | Mapped reads, % | RPKM | Forward/Reverse balance | Nonredundant, % | Strain specific | Strain specific, % from total mapped | Strain specific, RPKM |
|---------|-------------|-------|------------|--------------|-----------------|------|-------------------------|-----------------|-----------------|--------------------------------------|-----------------------|
| S2_L001 | 10000000    | SMoV  | SMoV_RNA1C | 3288         | 0.033           | 46.7 | 1.6                     | 55.8            | 3373            | 102.6                                | 23.2                  |

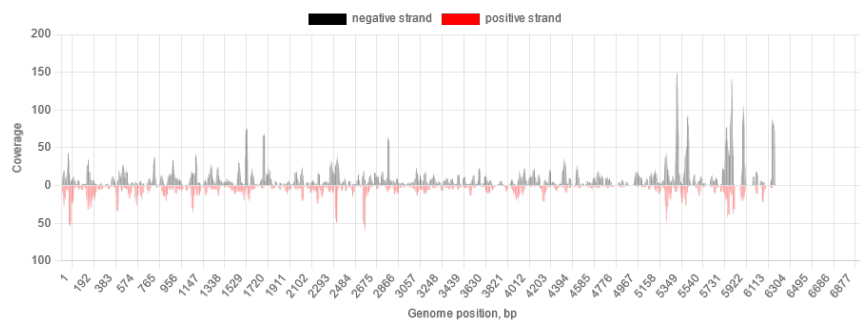

Mapping coverage of all reads matching SMoV\_RNA1C (4707 reads)

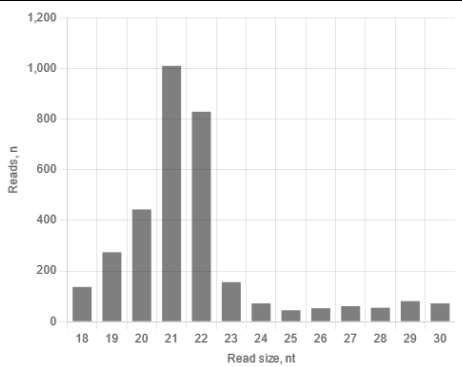

Length distribution of the reads

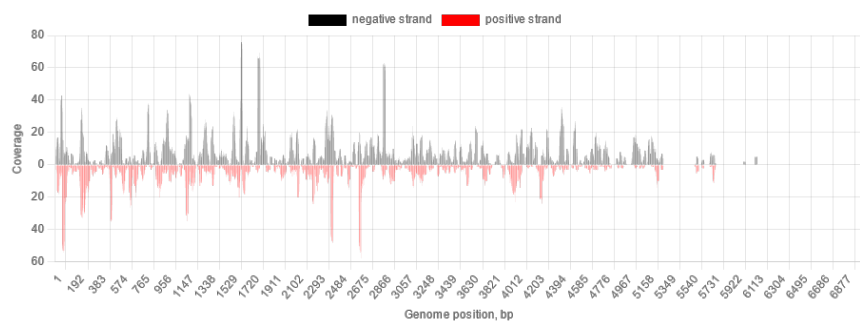

Mapping coverage of SMoV\_RNA1C specific reads (3373 reads)

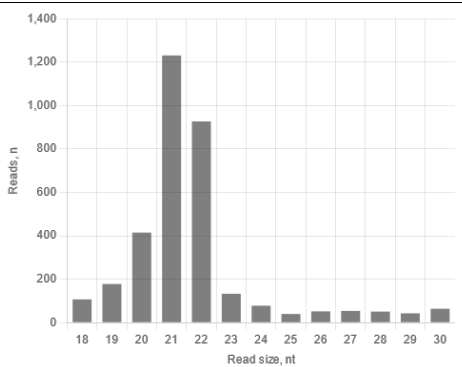

Length distribution of the reads

| Dataset | Input reads | Virus | Reference  | Mapped reads | Mapped reads, % | RPKM | Forward/Reverse balance | Nonredundant, % | Strain specific | Strain specific, % from total mapped | Strain specific, RPKM |
|---------|-------------|-------|------------|--------------|-----------------|------|-------------------------|-----------------|-----------------|--------------------------------------|-----------------------|
| S2_L001 | 10000000    | SMoV  | SMoV_RNA2A | 3285         | 0.033           | 52.4 | 1.9                     | 59.1            | 22              | 0.7                                  | 37.9                  |

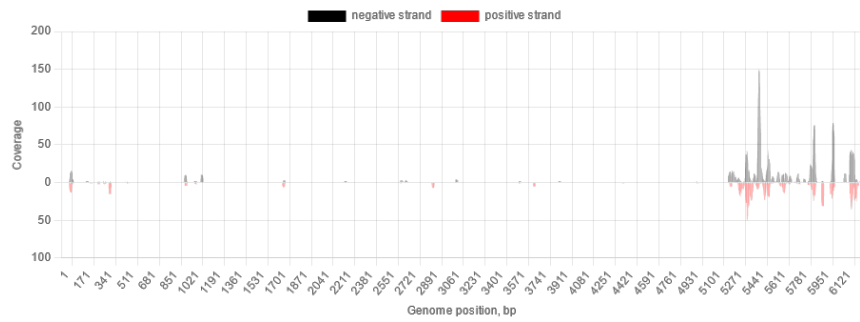

Mapping coverage of all reads matching SMoV\_RNA2A (1338 reads)

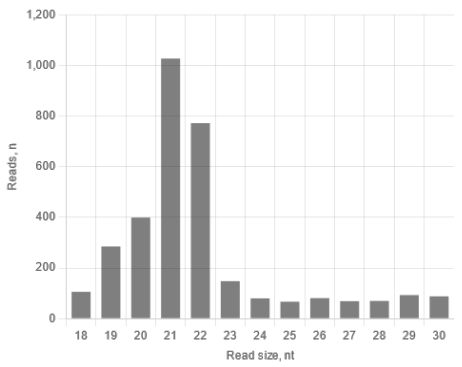

Length distribution of the reads

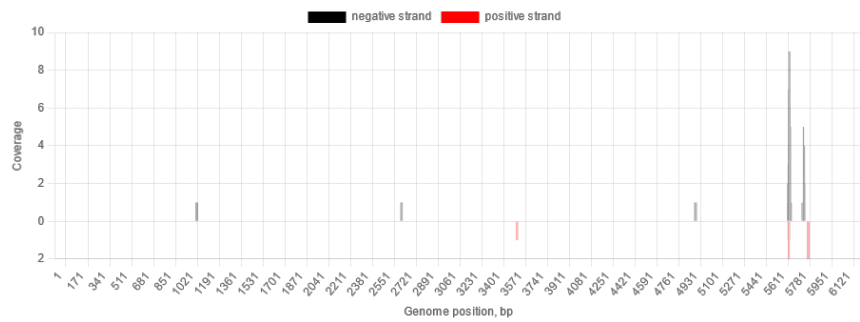

Mapping coverage of SMoV\_RNA2A specific reads (22 reads)

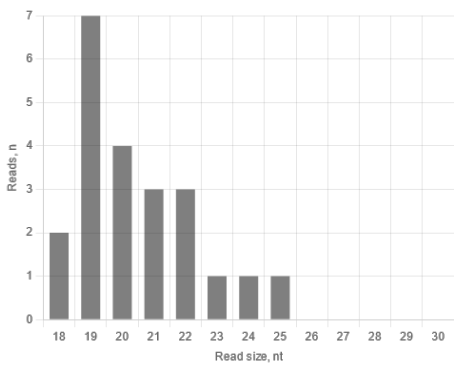

Length distribution of the reads

| Dataset | Input reads | Virus | Reference  | Mapped reads | Mapped reads, % | RPKM | Forward/Reverse balance | Nonredundant, % | Strain specific | Strain specific, % from total mapped | Strain specific, RPKM |
|---------|-------------|-------|------------|--------------|-----------------|------|-------------------------|-----------------|-----------------|--------------------------------------|-----------------------|
| S2_L001 | 100000000   | SMoV  | SMoV_RNA2B | 896          | 0.009           | 14.2 | 2.9                     | 52.1            | 3052            | 340.6                                | 0.2                   |

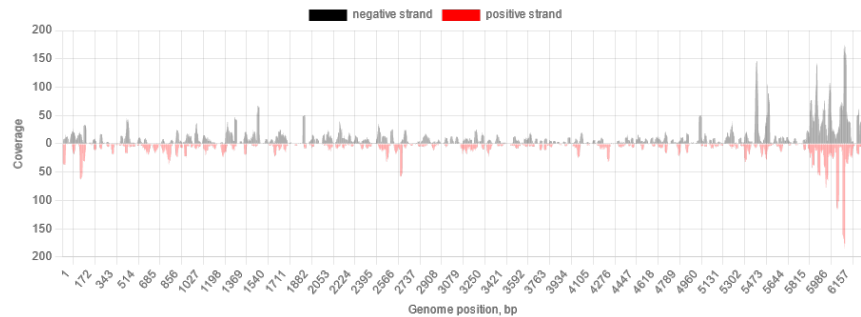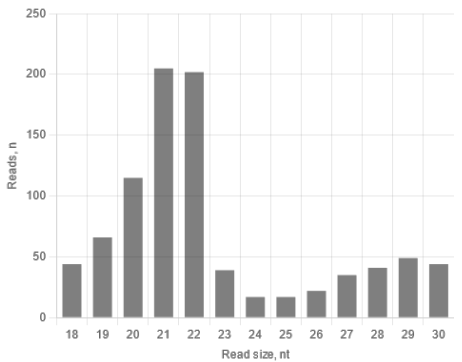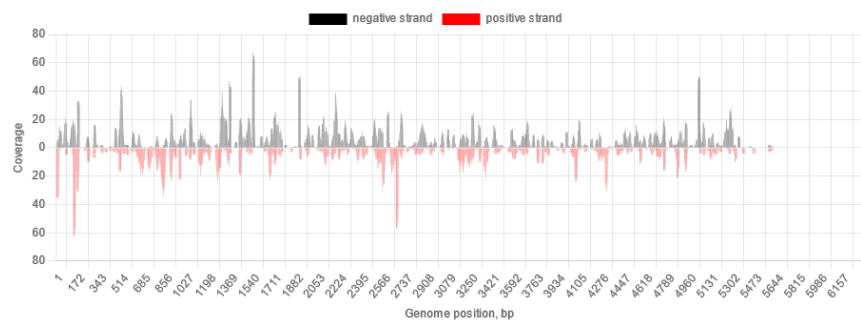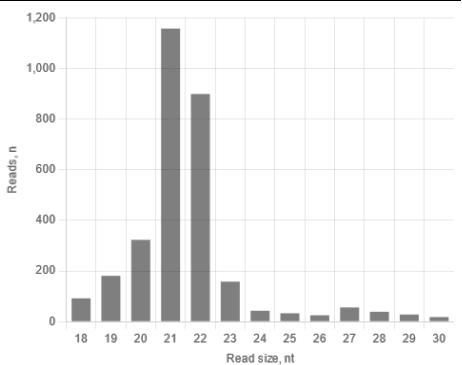

| Dataset | Input reads | Virus | Reference  | Mapped reads | Mapped reads, % | RPKM | Forward/Reverse balance | Nonredundant, % | Strain specific | Strain specific, % from total mapped | Strain specific, RPKM |
|---------|-------------|-------|------------|--------------|-----------------|------|-------------------------|-----------------|-----------------|--------------------------------------|-----------------------|
| S2_L001 | 100000000   | SMoV  | SMoV_RNA2C | 2815         | 0.028           | 44.4 | 1.7                     | 53.7            | 3               | 0.1                                  | 19.4                  |

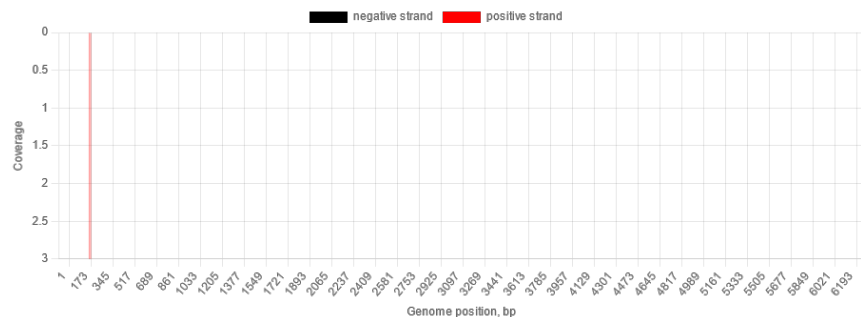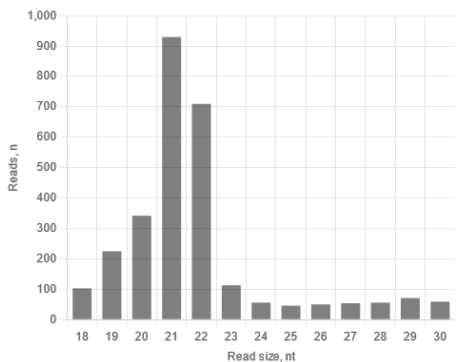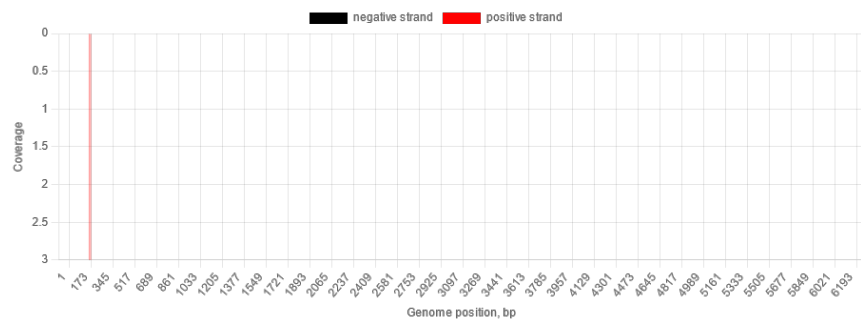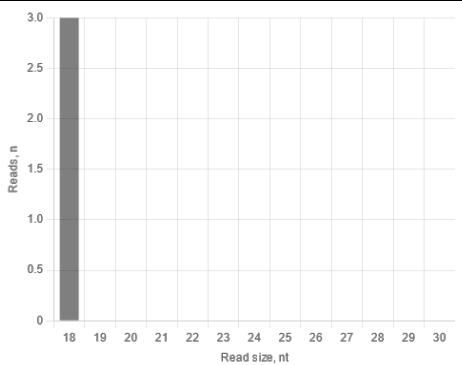

Mappings of the S3\_L001 reads against the viral references.

| Dataset | Input reads | Virus | Reference  | Mapped reads | Mapped reads, % | RPKM | Forward/Reverse balance | Nonredundant, % | Strain specific | Strain specific, % from total mapped | Strain specific, RPKM |
|---------|-------------|-------|------------|--------------|-----------------|------|-------------------------|-----------------|-----------------|--------------------------------------|-----------------------|
| S3_L001 | 10000000    | SMoV  | SMoV_RNA1A | 784          | 0.008           | 11.1 | 2.6                     | 58.4            | 5               | 0.6                                  | 0.0                   |

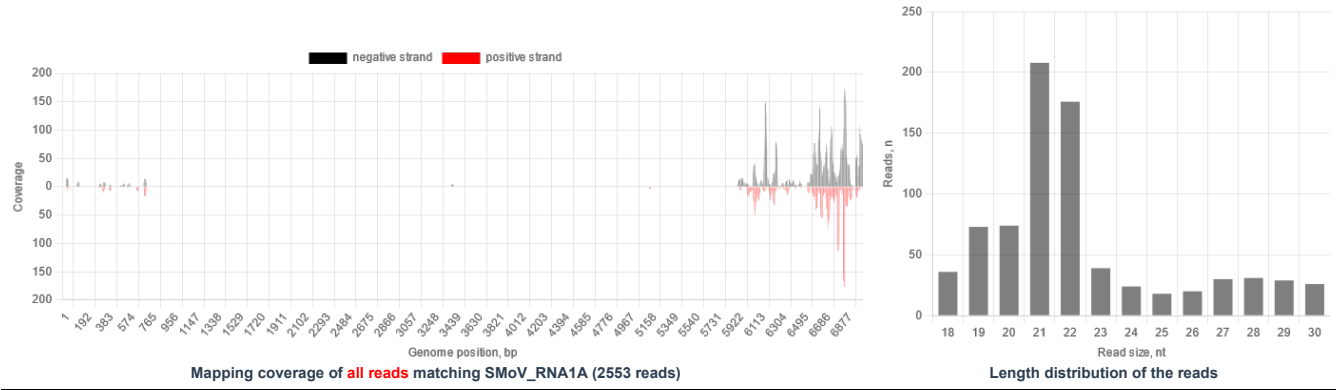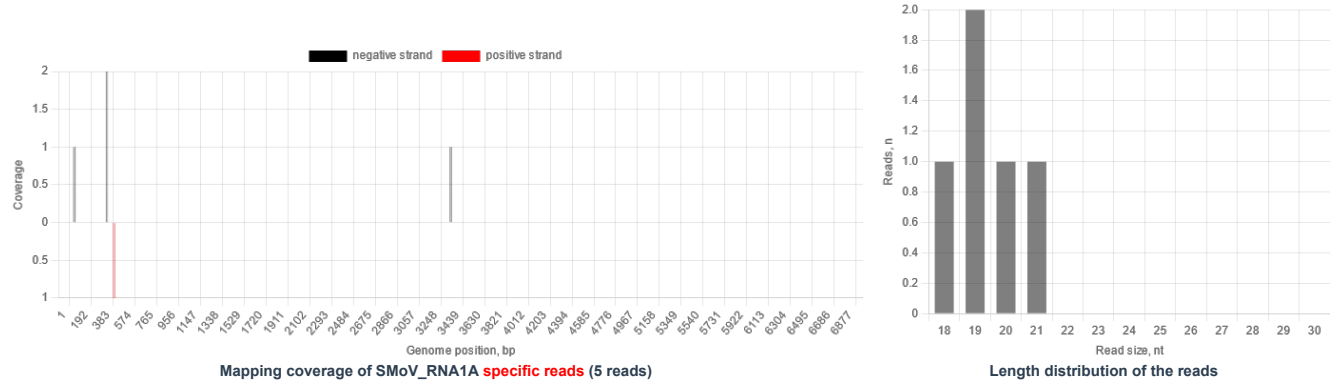

| Dataset | Input reads | Virus | Reference  | Mapped reads | Mapped reads, % | RPKM | Forward/Reverse balance | Nonredundant, % | Strain specific | Strain specific, % from total mapped | Strain specific, RPKM |
|---------|-------------|-------|------------|--------------|-----------------|------|-------------------------|-----------------|-----------------|--------------------------------------|-----------------------|
| S3_L001 | 10000000    | SMoV  | SMoV_RNA1B | 1426         | 0.014           | 20.2 | 2.0                     | 67.8            | 1654            | 116.0                                | 8.7                   |

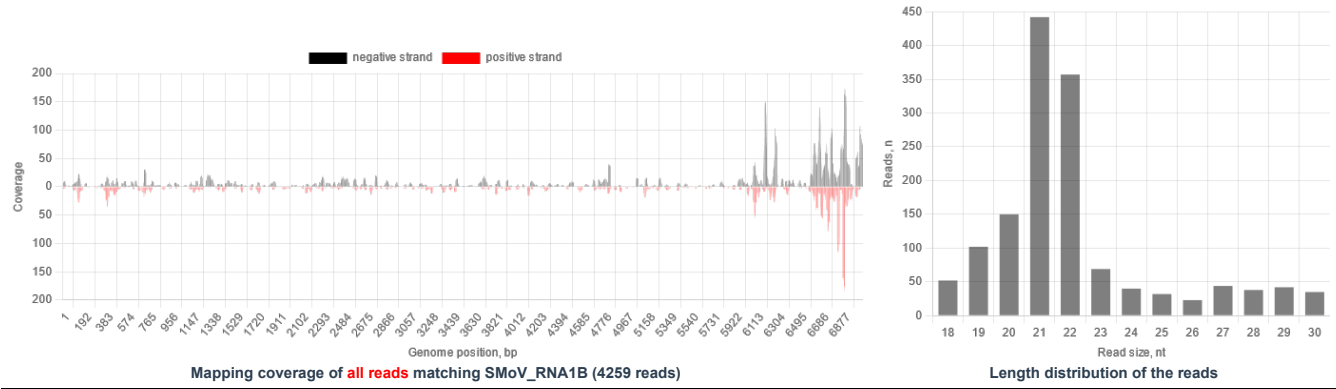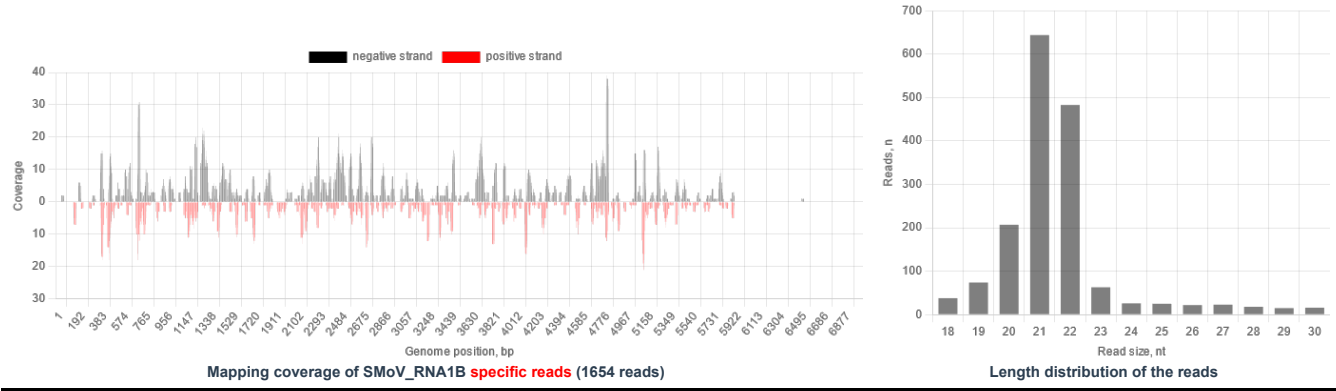

| Dataset | Input reads | Virus | Reference  | Mapped reads | Mapped reads, % | RPKM | Forward/Reverse balance | Nonredundant, % | Strain specific | Strain specific, % from total mapped reads | Strain specific, RPKM |
|---------|-------------|-------|------------|--------------|-----------------|------|-------------------------|-----------------|-----------------|--------------------------------------------|-----------------------|
| S3_L001 | 10000000    | SMoV  | SMoV_RNA1C | 1665         | 0.017           | 23.7 | 1.9                     | 68.6            | 3924            | 235.7                                      | 12.3                  |

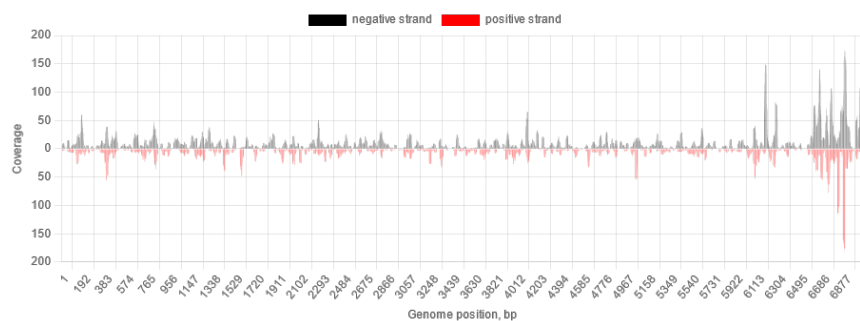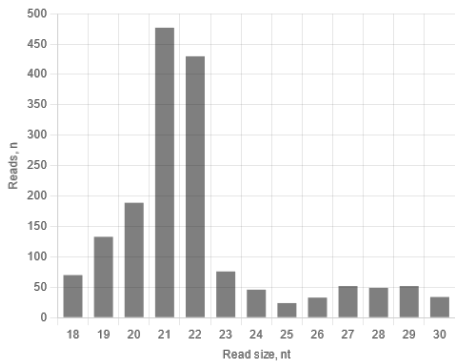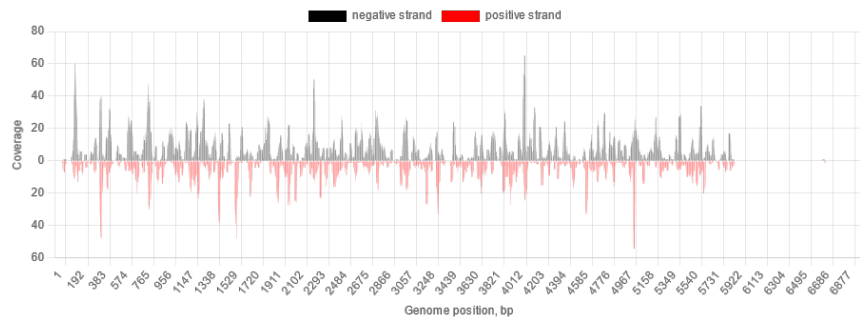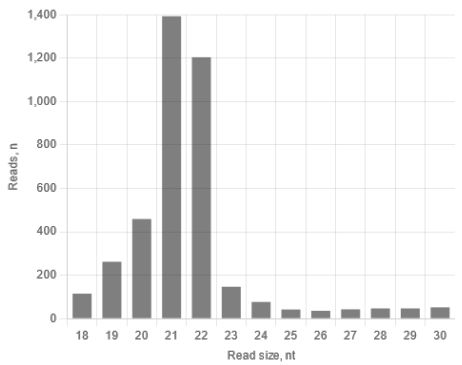

| Dataset | Input reads | Virus | Reference  | Mapped reads | Mapped reads, % | RPKM | Forward/Reverse balance | Nonredundant, % | Strain specific | Strain specific, % from total mapped reads | Strain specific, RPKM |
|---------|-------------|-------|------------|--------------|-----------------|------|-------------------------|-----------------|-----------------|--------------------------------------------|-----------------------|
| S3_L001 | 10000000    | SMoV  | SMoV_RNA2A | 1493         | 0.015           | 23.8 | 1.9                     | 69.8            | 3373            | 225.9                                      | 17.1                  |

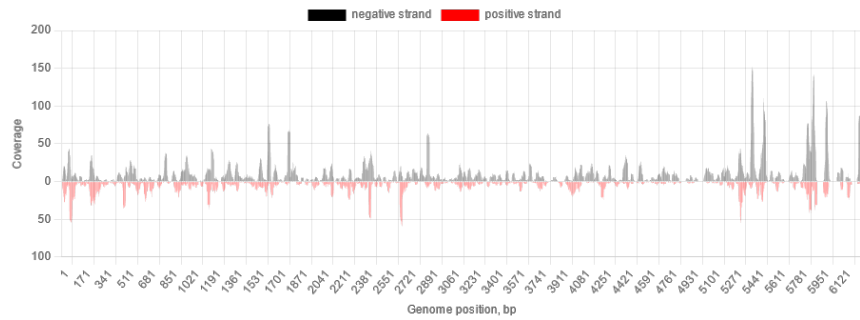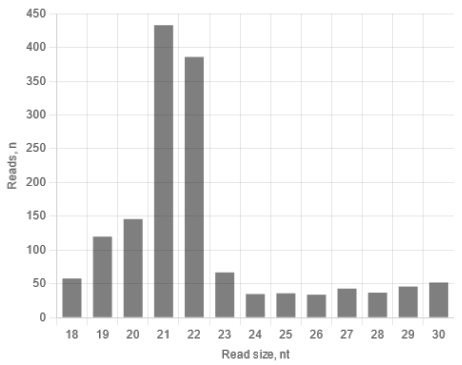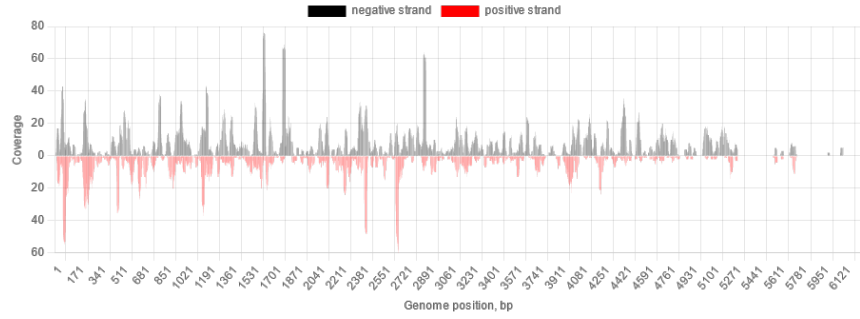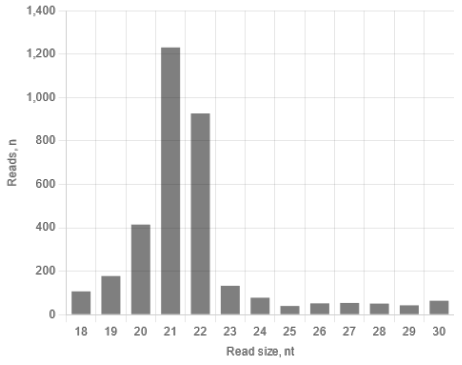



| Dataset | Input reads | Virus | Reference  | Mapped reads | Mapped reads, % | RPKM | Forward/Reverse balance | Nonredundant, % | Strain specific | Strain specific, % from total mapped | Strain specific, RPKM |
|---------|-------------|-------|------------|--------------|-----------------|------|-------------------------|-----------------|-----------------|--------------------------------------|-----------------------|
| S3_L001 | 10000000    | SMoV  | SMoV_RNA2B | 416          | 0.004           | 6.6  | 2.9                     | 66.3            | 22              | 5.3                                  | 0.1                   |

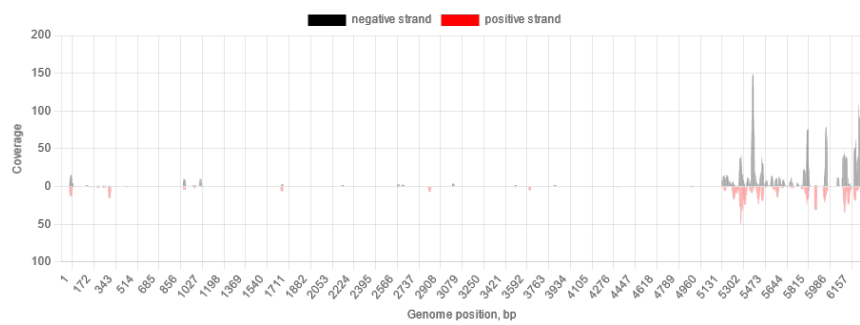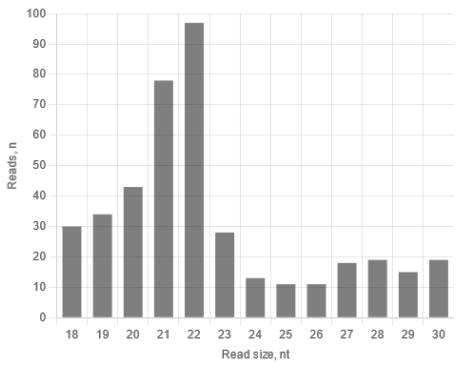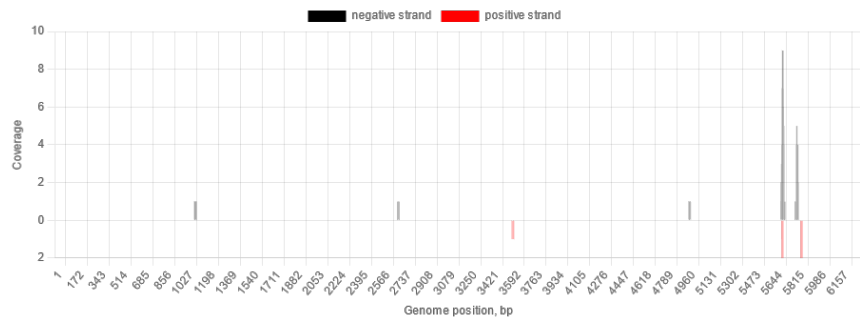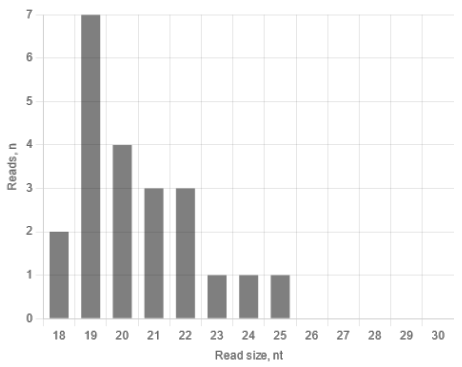

| Dataset | Input reads | Virus | Reference  | Mapped reads | Mapped reads, % | RPKM | Forward/Reverse balance | Nonredundant, % | Strain specific | Strain specific, % from total mapped | Strain specific, RPKM |
|---------|-------------|-------|------------|--------------|-----------------|------|-------------------------|-----------------|-----------------|--------------------------------------|-----------------------|
| S3_L001 | 10000000    | SMoV  | SMoV_RNA2C | 1378         | 0.014           | 21.7 | 2.0                     | 65.8            | 3052            | 221.5                                | 10.0                  |

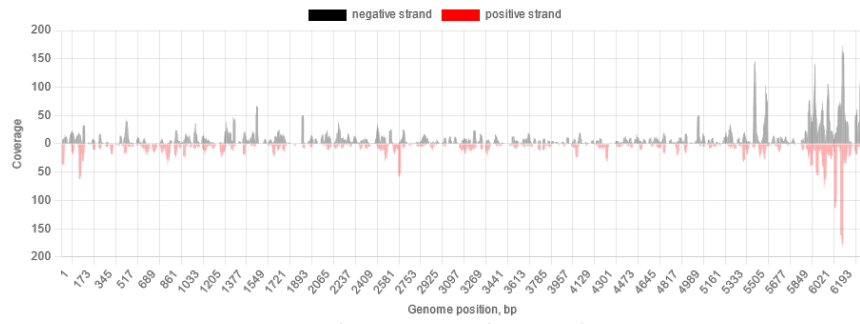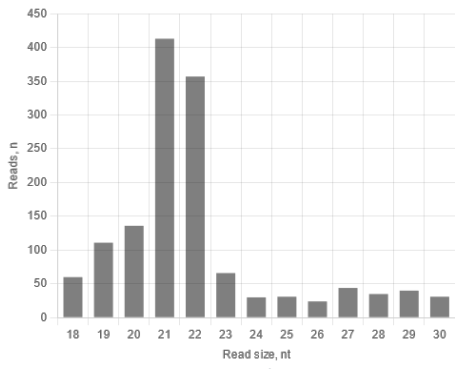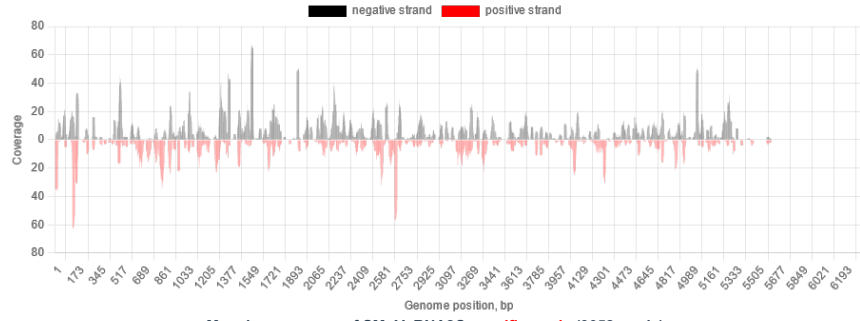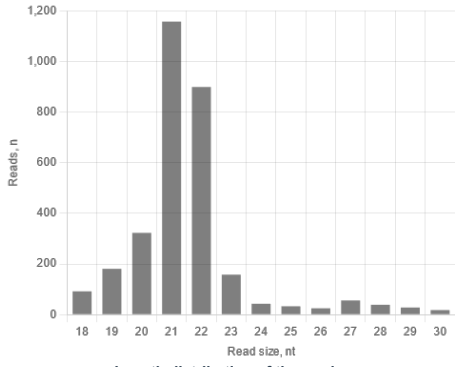

Mappings of the S4\_L001 reads against the viral references. *qPCR detection: SMoV RNA1B,C & SMoV RNA2A,C*

| Dataset | Input reads | Virus | Reference  | Mapped reads | Mapped reads, % | RPKM | Forward/Reverse balance | Nonredundant, % | Strain specific | Strain specific, % from total mapped reads | Strain specific, RPKM |
|---------|-------------|-------|------------|--------------|-----------------|------|-------------------------|-----------------|-----------------|--------------------------------------------|-----------------------|
| S4_L001 | 10000000    | SMoV  | SMoV_RNA1A | 2763         | 0.028           | 39.3 | 1.4                     | 39.0            | 5               | 0.2                                        | 0.0                   |

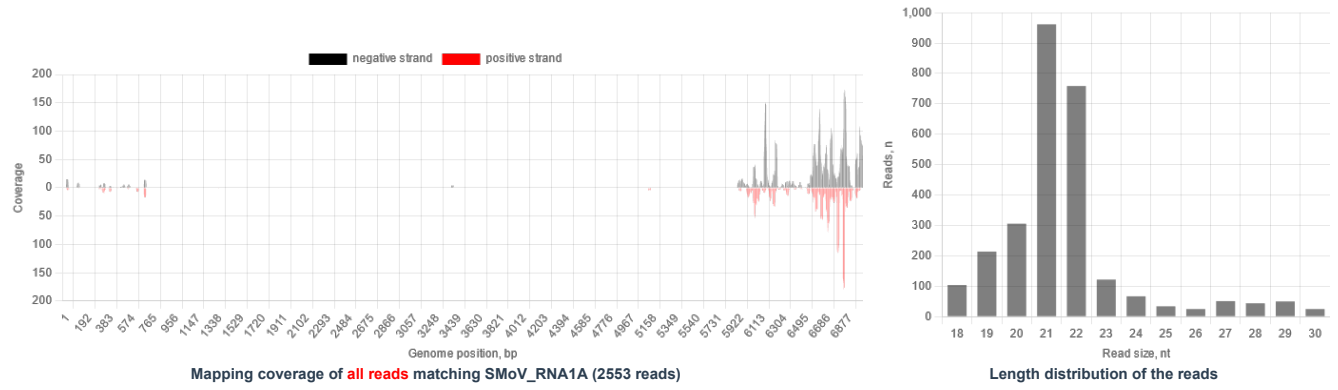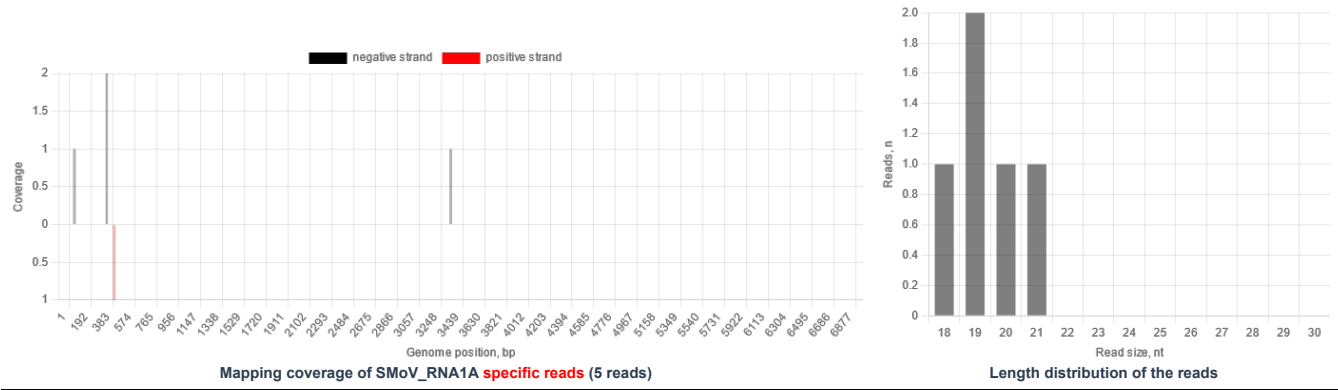

| Dataset | Input reads | Virus | Reference  | Mapped reads | Mapped reads, % | RPKM | Forward/Reverse balance | Nonredundant, % | Strain specific | Strain specific, % from total mapped reads | Strain specific, RPKM |
|---------|-------------|-------|------------|--------------|-----------------|------|-------------------------|-----------------|-----------------|--------------------------------------------|-----------------------|
| S4_L001 | 10000000    | SMoV  | SMoV_RNA1B | 5012         | 0.050           | 71.1 | 1.3                     | 49.3            | 1654            | 33.0                                       | 31.0                  |

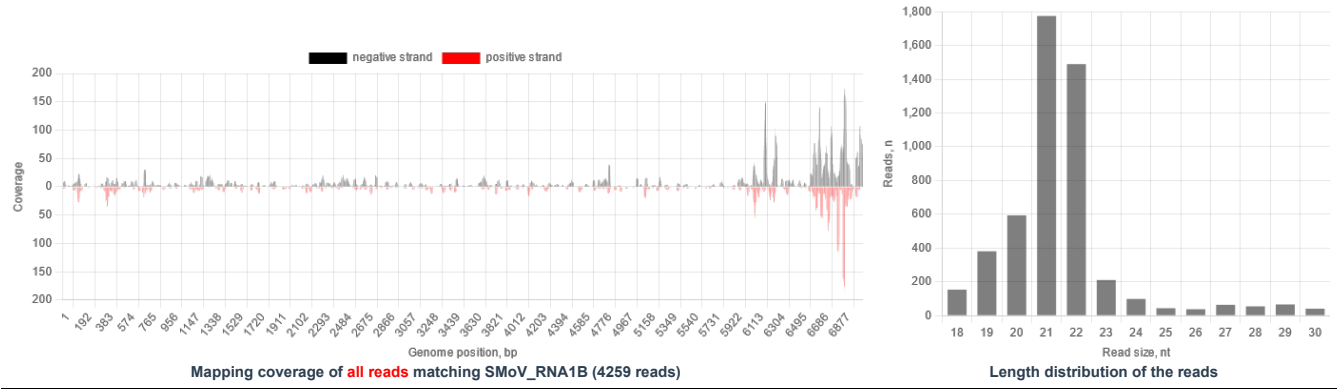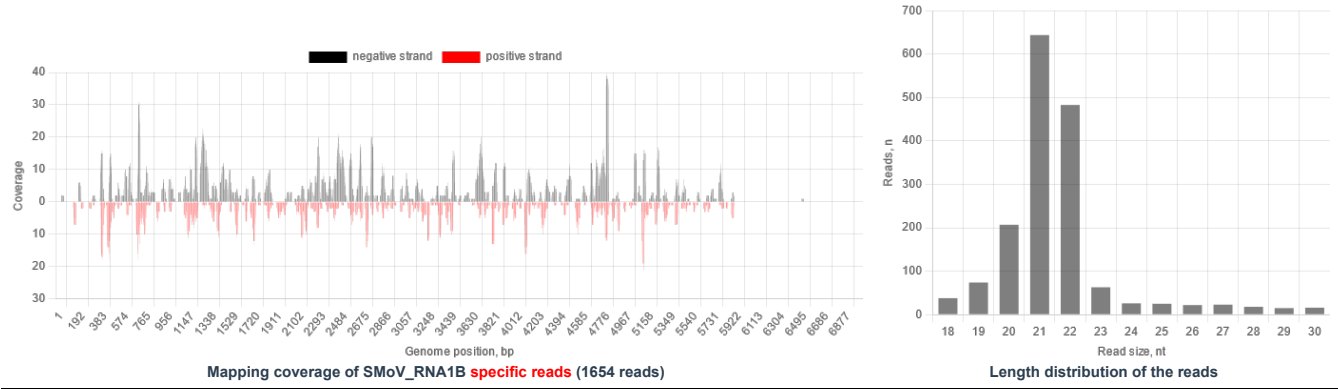

| Dataset | Input reads | Virus | Reference  | Mapped reads | Mapped reads, % | RPKM | Forward/Reverse balance | Nonredundant, % | Strain specific | Strain specific, % from total mapped reads | Strain specific, RPKM |
|---------|-------------|-------|------------|--------------|-----------------|------|-------------------------|-----------------|-----------------|--------------------------------------------|-----------------------|
| S4_L001 | 10000000    | SMoV  | SMoV_RNA1C | 6659         | 0.067           | 94.6 | 1.3                     | 50.6            | 3924            | 58.9                                       | 54.5                  |

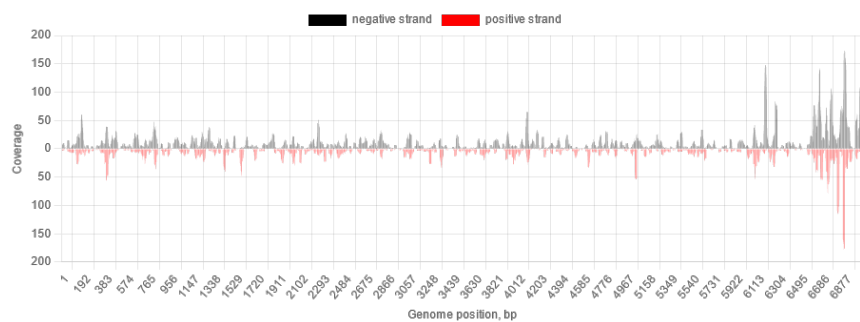

Mapping coverage of all reads matching SMoV\_RNA1C (6533 reads)

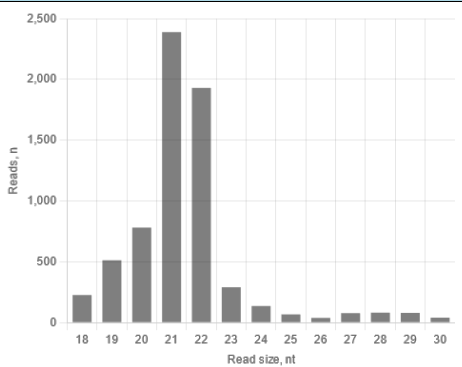

Length distribution of the reads

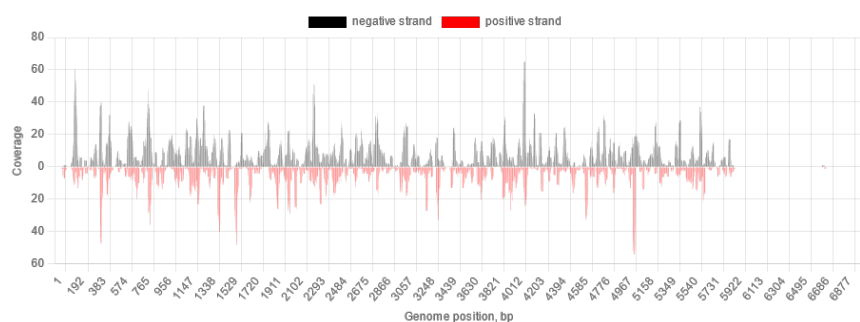

Mapping coverage of SMoV\_RNA1C specific reads (3924 reads)

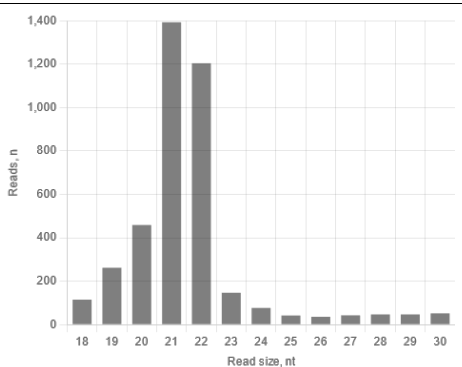

Length distribution of the reads

| Dataset | Input reads | Virus | Reference  | Mapped reads | Mapped reads, % | RPKM | Forward/Reverse balance | Nonredundant, % | Strain specific | Strain specific, % from total mapped reads | Strain specific, RPKM |
|---------|-------------|-------|------------|--------------|-----------------|------|-------------------------|-----------------|-----------------|--------------------------------------------|-----------------------|
| S4_L001 | 10000000    | SMoV  | SMoV_RNA2A | 4572         | 0.046           | 72.9 | 1.5                     | 55.3            | 3373            | 73.8                                       | 51.5                  |

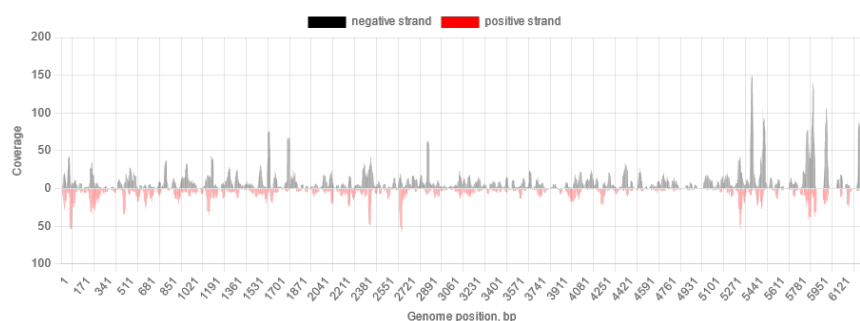

Mapping coverage of all reads matching SMoV\_RNA2A (4707 reads)

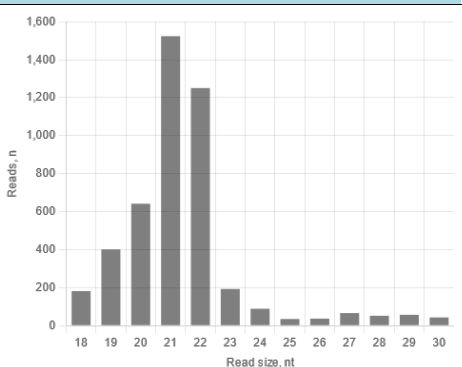

Length distribution of the reads

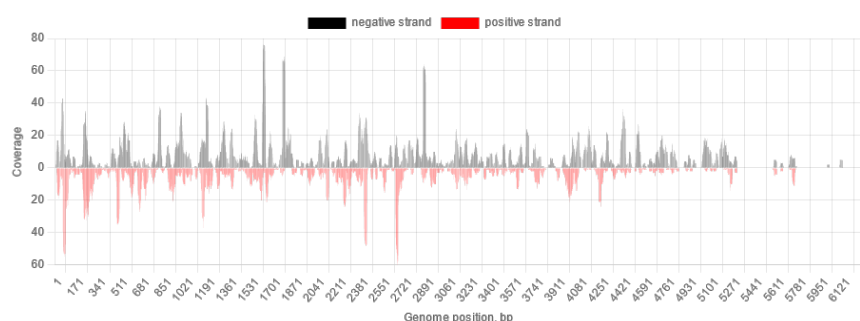

Mapping coverage of SMoV\_RNA2A specific reads (3373 reads)

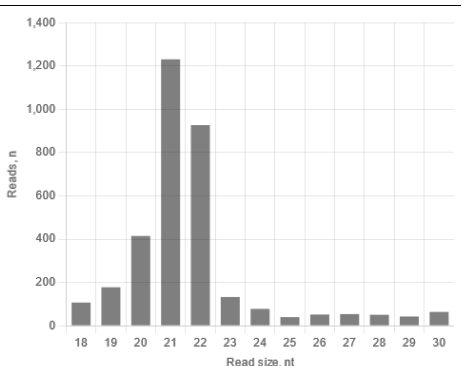

Length distribution of the reads

| Dataset | Input reads | Virus | Reference  | Mapped reads | Mapped reads, % | RPKM | Forward/Reverse balance | Nonredundant, % | Strain specific | Strain specific, % from total mapped reads | Strain specific, RPKM |
|---------|-------------|-------|------------|--------------|-----------------|------|-------------------------|-----------------|-----------------|--------------------------------------------|-----------------------|
| S4_L001 | 10000000    | SMoV  | SMoV_RNA2B | 1373         | 0.014           | 21.7 | 1.8                     | 51.0            | 22              | 1.6                                        | 0.4                   |

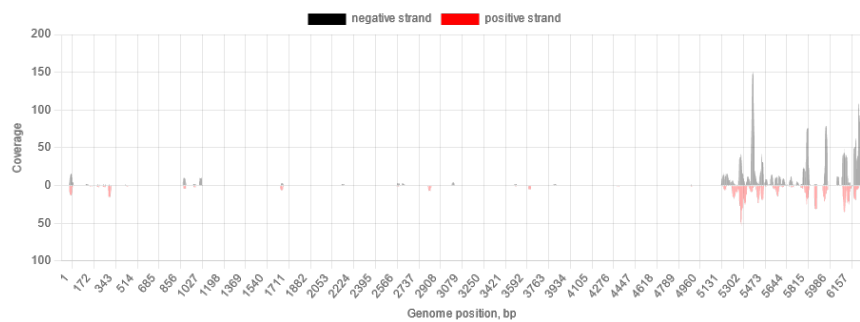

Mapping coverage of all reads matching SMoV\_RNA2B (1338 reads)

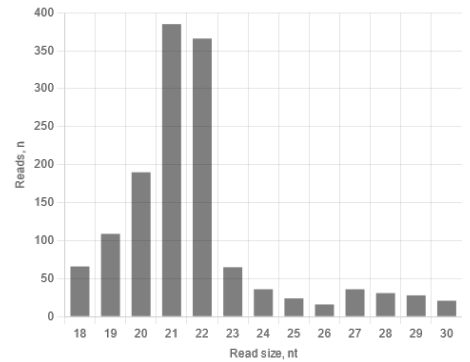

Length distribution of the reads

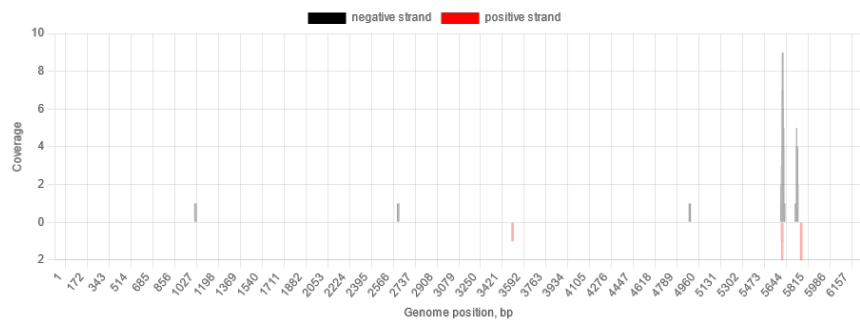

Mapping coverage of SMoV\_RNA2B specific reads (22 reads)

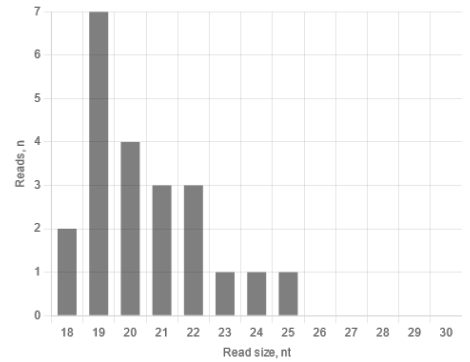

Length distribution of the reads

| Dataset | Input reads | Virus | Reference  | Mapped reads | Mapped reads, % | RPKM | Forward/Reverse balance | Nonredundant, % | Strain specific | Strain specific, % from total mapped reads | Strain specific, RPKM |
|---------|-------------|-------|------------|--------------|-----------------|------|-------------------------|-----------------|-----------------|--------------------------------------------|-----------------------|
| S4_L001 | 10000000    | SMoV  | SMoV_RNA2C | 5507         | 0.055           | 86.9 | 1.4                     | 49.0            | 3052            | 55.4                                       | 44.8                  |

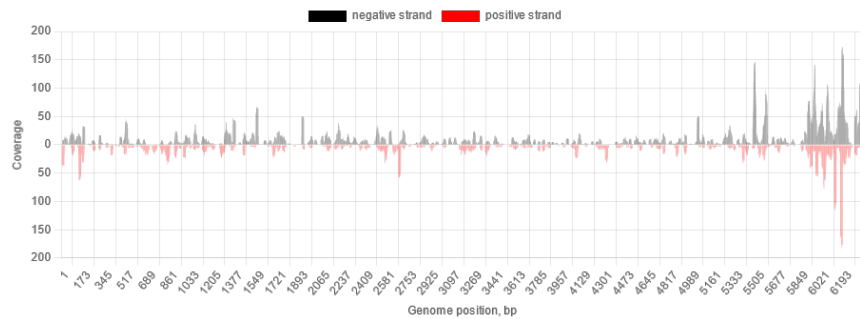

Mapping coverage of all reads matching SMoV\_RNA2C (5494 reads)

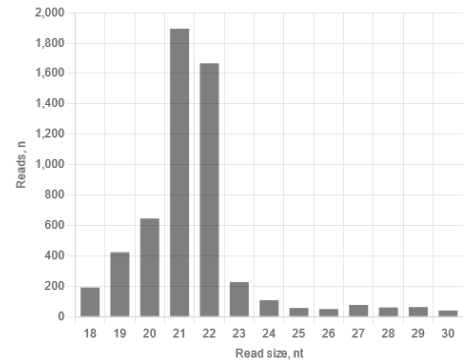

Length distribution of the reads

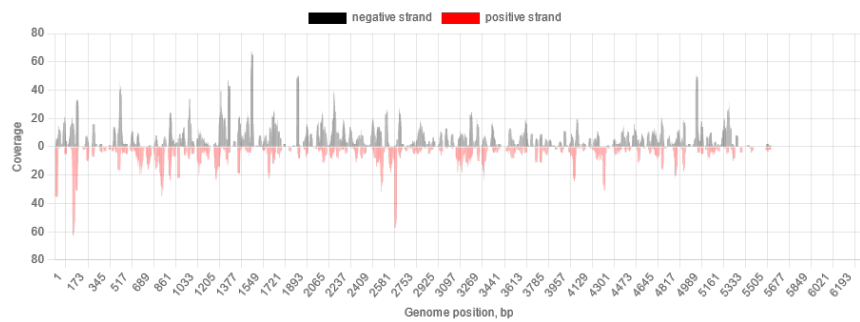

Mapping coverage of SMoV\_RNA2C specific reads (3052 reads)

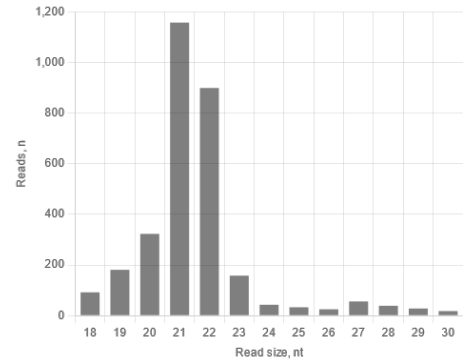

Length distribution of the reads

Mappings of the S92\_L004 reads against the viral references. qPCR detection: SMoV RNA1B,C & SMoV RNA2A,C

| Dataset  | Input reads | Virus | Reference  | Mapped reads | Mapped reads, % | RPKM | Forward/Reverse balance | Nonredundant, % | Strain specific | Strain specific, % from total mapped reads | Strain specific, RPKM |
|----------|-------------|-------|------------|--------------|-----------------|------|-------------------------|-----------------|-----------------|--------------------------------------------|-----------------------|
| S92_L004 | 10000000    | SMoV  | SMoV_RNA1A | 4093         | 0.041           | 58.2 | 1.2                     | 31.3            | 5               | 0.1                                        | 0.5                   |

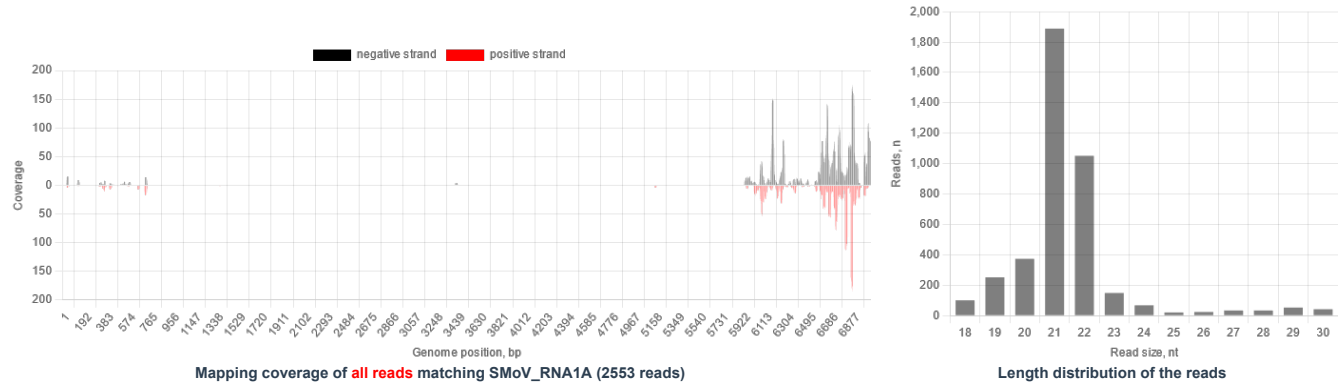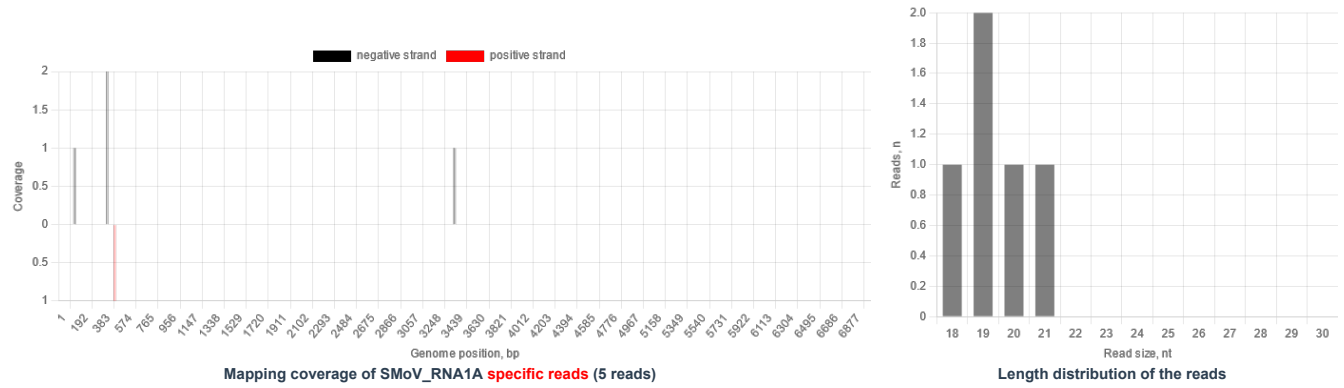

| Dataset  | Input reads | Virus | Reference  | Mapped reads | Mapped reads, % | RPKM  | Forward/Reverse balance | Nonredundant, % | Strain specific | Strain specific, % from total mapped reads | Strain specific, RPKM |
|----------|-------------|-------|------------|--------------|-----------------|-------|-------------------------|-----------------|-----------------|--------------------------------------------|-----------------------|
| S92_L004 | 10000000    | SMoV  | SMoV_RNA1B | 9598         | 0.096           | 136.2 | 1.2                     | 41.4            | 1654            | 17.2                                       | 76.2                  |

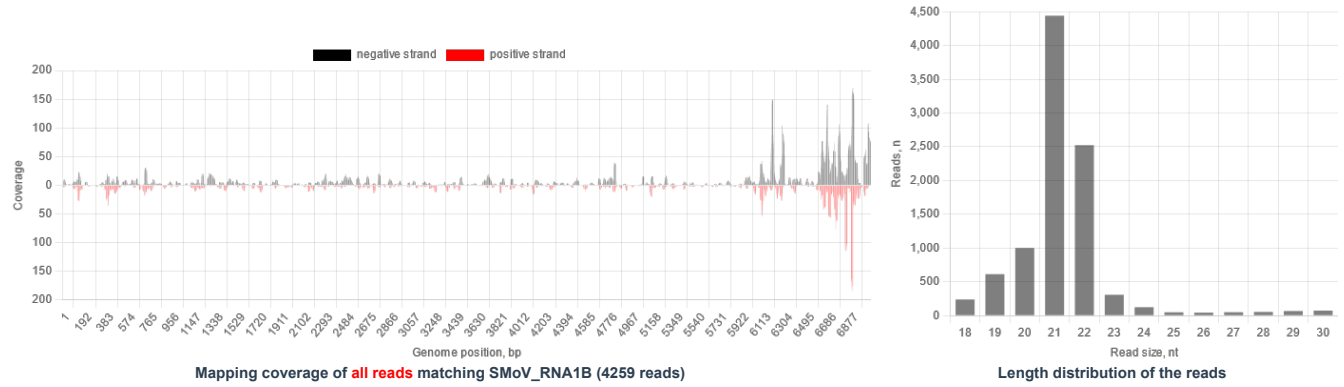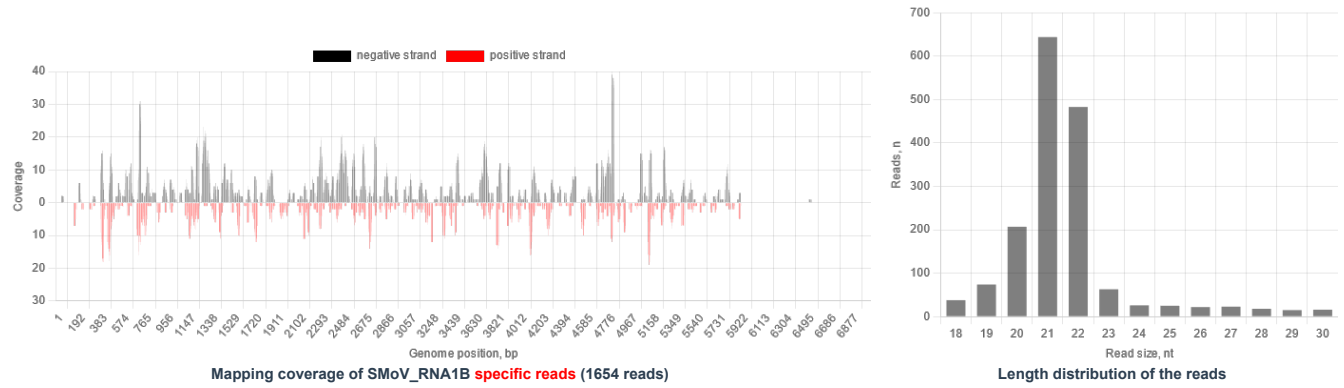

| Dataset  | Input reads | Virus | Reference  | Mapped reads | Mapped reads, % | RPKM  | Forward/Reverse balance | Nonredundant, % | Strain specific | Strain specific, % from total mapped reads | Strain specific, RPKM |
|----------|-------------|-------|------------|--------------|-----------------|-------|-------------------------|-----------------|-----------------|--------------------------------------------|-----------------------|
| S92_L004 | 10000000    | SMoV  | SMoV_RNA1C | 10078        | 0.101           | 143.2 | 1.3                     | 41.8            | 3924            | 38.9                                       | 84.7                  |

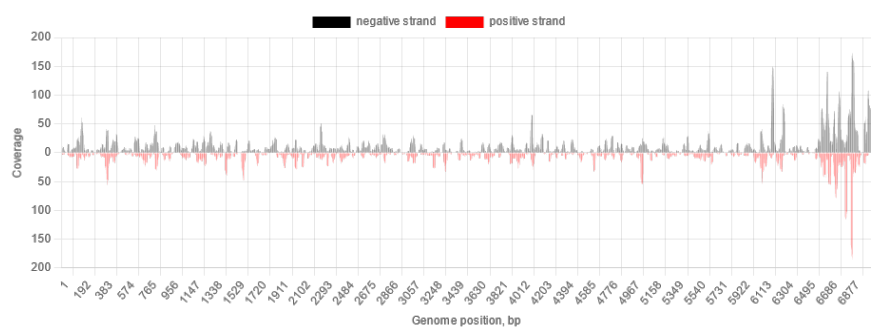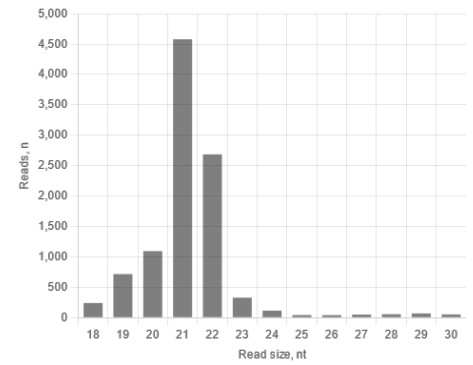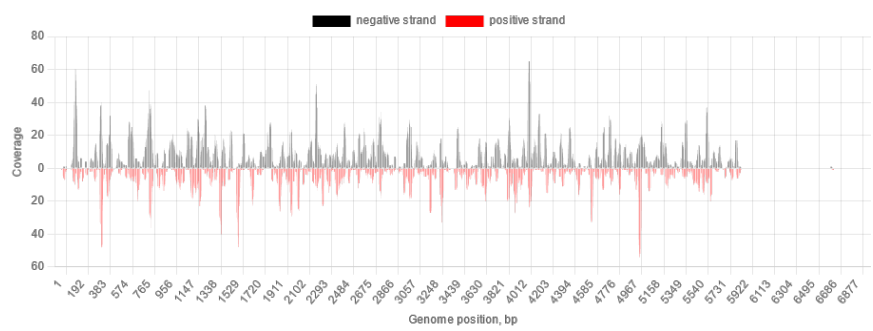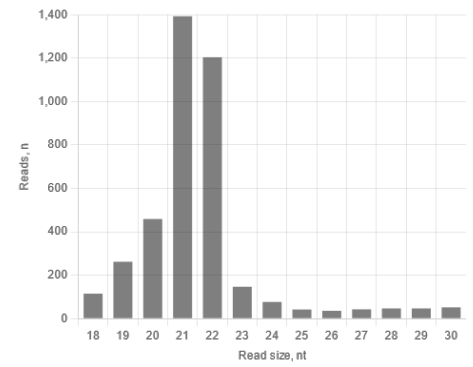

| Dataset  | Input reads | Virus | Reference  | Mapped reads | Mapped reads, % | RPKM  | Forward/Reverse balance | Nonredundant, % | Strain specific | Strain specific, % from total mapped reads | Strain specific, RPKM |
|----------|-------------|-------|------------|--------------|-----------------|-------|-------------------------|-----------------|-----------------|--------------------------------------------|-----------------------|
| S92_L004 | 10000000    | SMoV  | SMoV_RNA2A | 6763         | 0.068           | 107.9 | 1.6                     | 48.0            | 3373            | 49.9                                       | 77.7                  |

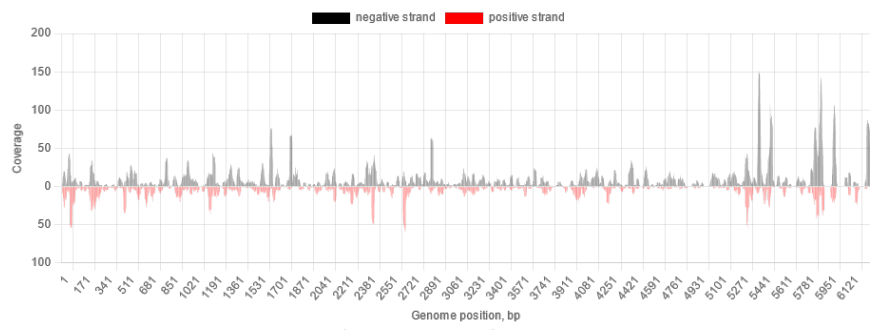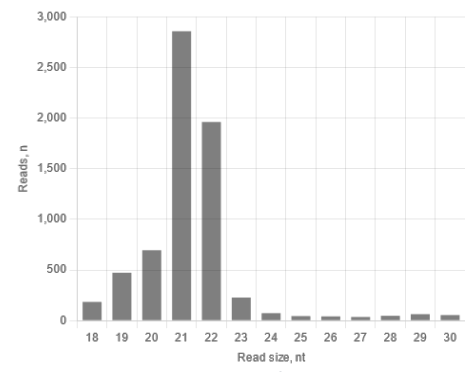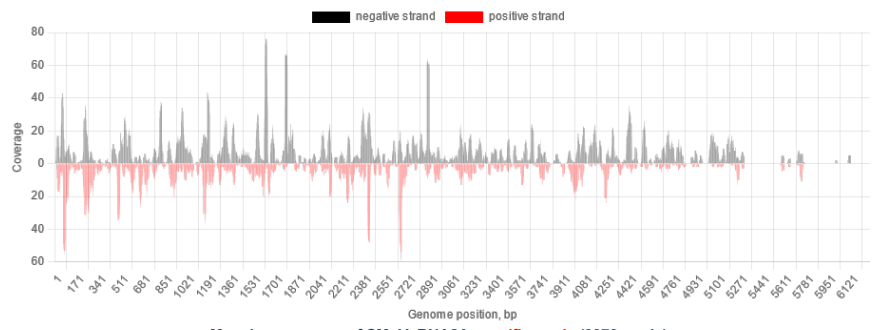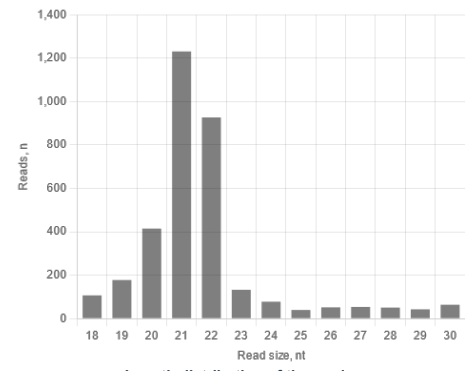

| Dataset  | Input reads | Virus | Reference  | Mapped reads | Mapped reads, % | RPKM | Forward/Reverse balance | Nonredundant, % | Strain specific | Strain specific, % from total mapped reads | Strain specific, RPKM |
|----------|-------------|-------|------------|--------------|-----------------|------|-------------------------|-----------------|-----------------|--------------------------------------------|-----------------------|
| S92_L004 | 10000000    | SMoV  | SMoV_RNA2B | 2170         | 0.022           | 34.3 | 1.9                     | 43.1            | 22              | 1.0                                        | 0.6                   |

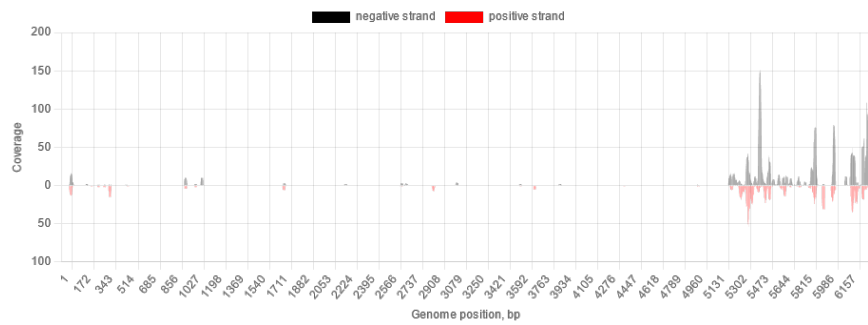

Mapping coverage of all reads matching SMoV\_RNA2B (1338 reads)

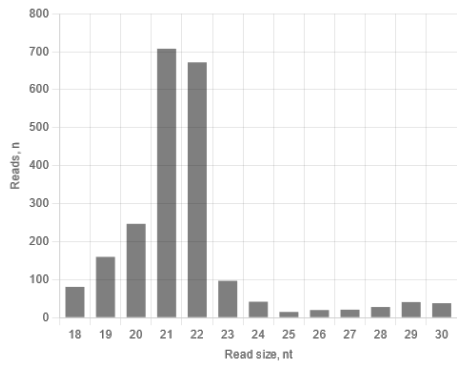

Length distribution of the reads

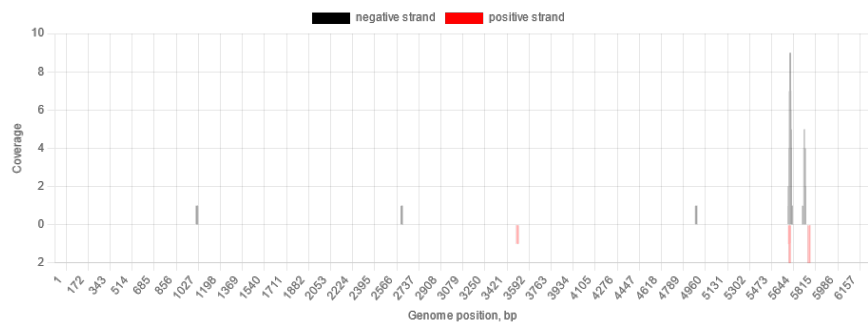

Mapping coverage of SMoV\_RNA2B specific reads (22 reads)

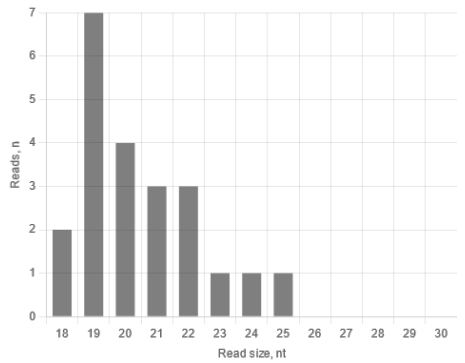

Length distribution of the reads

| Dataset  | Input reads | Virus | Reference  | Mapped reads | Mapped reads, % | RPKM  | Forward/Reverse balance | Nonredundant, % | Strain specific | Strain specific, % from total mapped reads | Strain specific, RPKM |
|----------|-------------|-------|------------|--------------|-----------------|-------|-------------------------|-----------------|-----------------|--------------------------------------------|-----------------------|
| S92_L004 | 10000000    | SMoV  | SMoV_RNA2C | 11300        | 0.113           | 178.3 | 1.3                     | 39.8            | 3052            | 27.0                                       | 114.2                 |

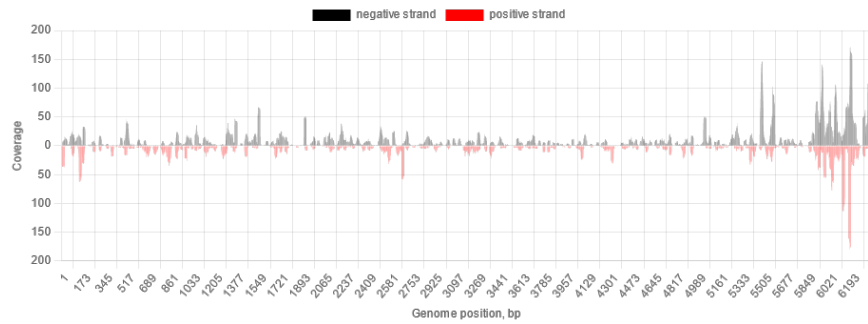

Mapping coverage of all reads matching SMoV\_RNA2C (5494 reads)

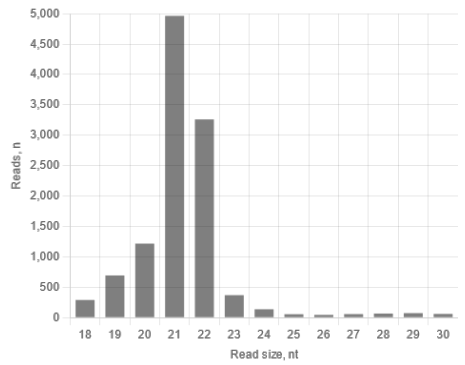

Length distribution of the reads

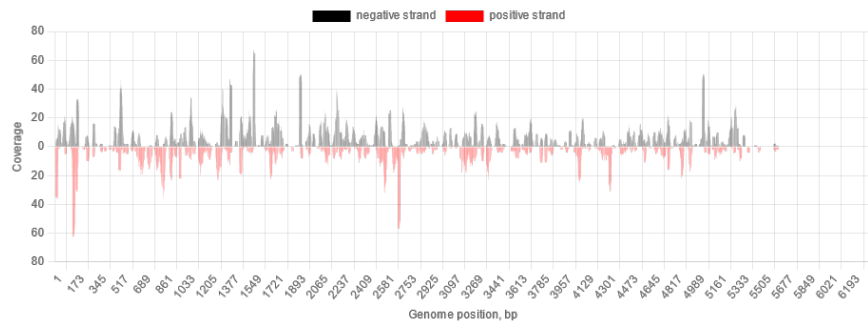

Mapping coverage of SMoV\_RNA2C specific reads (3052 reads)

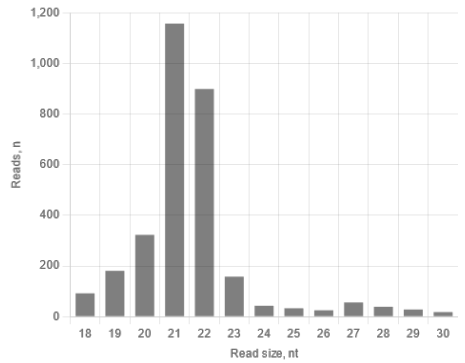

Length distribution of the reads

| Dataset  | Input reads | Virus | Reference | Mapped reads | Mapped reads, % | RPKM | Forward/Reverse balance | Nonredundant, % | Strain specific | Strain specific, % from total mapped reads | Strain specific, RPKM |
|----------|-------------|-------|-----------|--------------|-----------------|------|-------------------------|-----------------|-----------------|--------------------------------------------|-----------------------|
| S92_L004 | 10000000    | StrV1 | StrV1_A   | 38           | 0.000           | 0.3  | 0.7                     | 97.4            | 3               | 7.9                                        | 0.2                   |

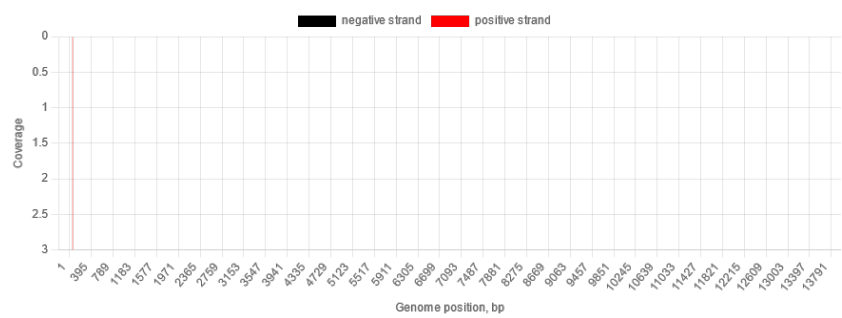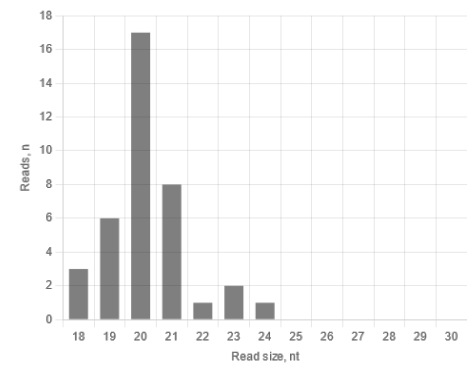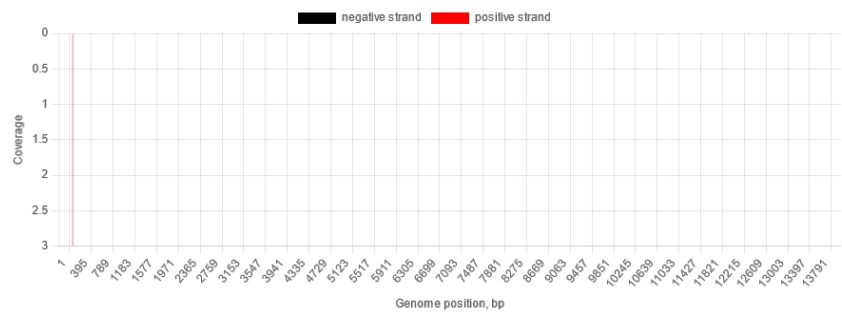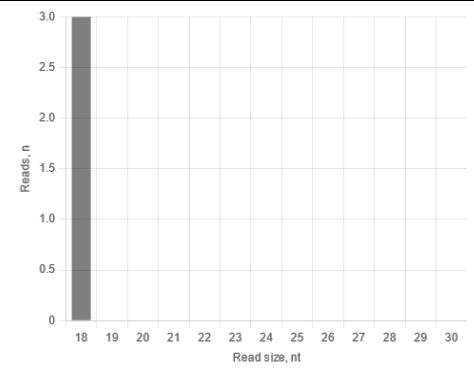

| Dataset  | Input reads | Virus | Reference | Mapped reads | Mapped reads, % | RPKM | Forward/Reverse balance | Nonredundant, % | Strain specific | Strain specific, % from total mapped reads | Strain specific, RPKM |
|----------|-------------|-------|-----------|--------------|-----------------|------|-------------------------|-----------------|-----------------|--------------------------------------------|-----------------------|
| S92_L004 | 10000000    | StrV1 | StrV1_B   | 20           | 0.000           | 0.1  | 1.5                     | 100.0           | 0               | 0.0                                        | 0.1                   |

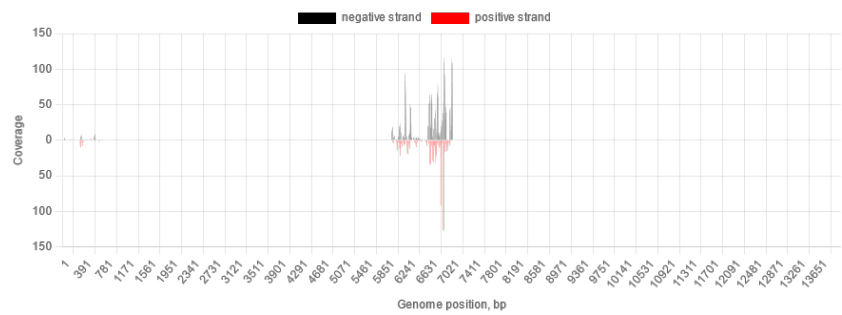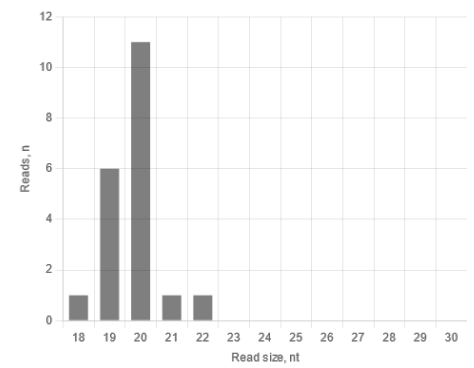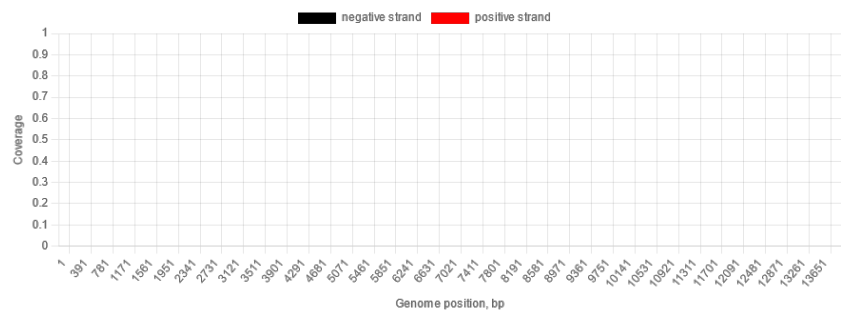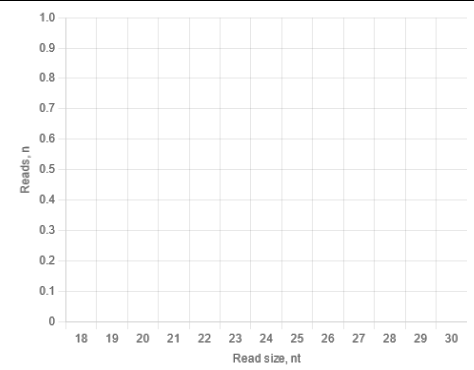

Supplement: s1 [file s1]
