# Supplementary material for: Analysis of Virus-Derived siRNAs in Strawberry Plants Co-Infected with Multiple Viruses and Their Genotypes
Source: MDPI journal article supplement (doi:10.3390/plants12132564), 2023-07-06

Figure S1 Distribution of viral small interfering RNAs (reads) from the 1B, 2A, and 3K samples.

Datasets were named after respective plant with an addition of a number suffix, i.e 1B1, 1B2 and so on.

Color legends show strand specificity of the mapped reads. Axes of abscissas show genomic position in nucleotides, axes of ordinates show sequence (mapping) coverage. Termini direction is from 5' to 3' (left to right).

qPCR detection: all strawberry crinkle (SCV), strawberry mottle virus (SMoV) and strawberry virus 1 (StrV1) strains were detected in all samples

Mappings of the 1B\_1 reads against the viral references.

| Dataset | Input reads | Virus | Reference | Mapped reads | Mapped reads, % | RPKM | Forward/Reverse balance | Nonredundant, % | Strain specific | Strain specific, % from total mapped reads | Strain specific, RPKM |
|---------|-------------|-------|-----------|--------------|-----------------|------|-------------------------|-----------------|-----------------|--------------------------------------------|-----------------------|
| 1B_1    | 10000000    | SCV   | SCV_A     | 7814         | 0.078           | 53.7 | 0.8                     | 55.9            | 6504            | 83.2                                       | 44.7                  |

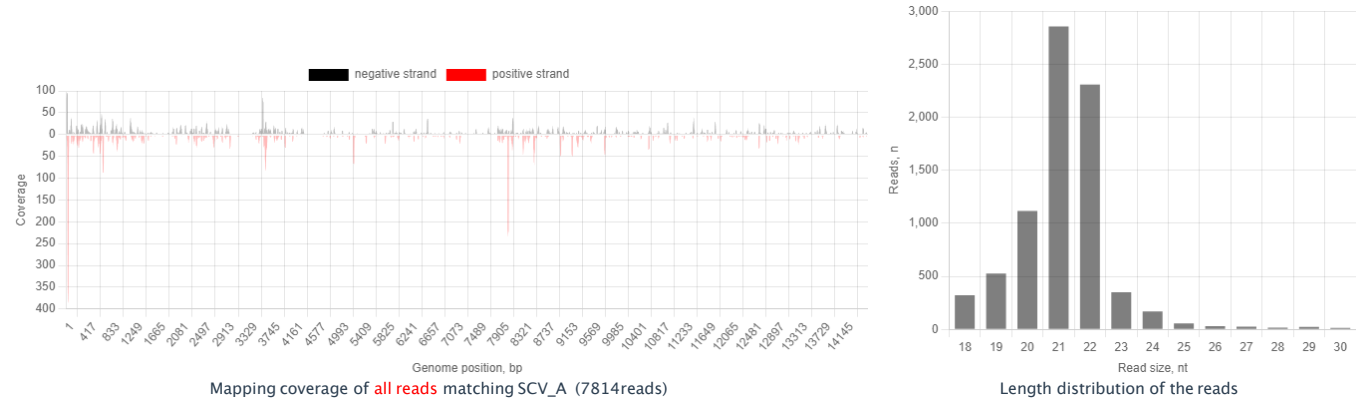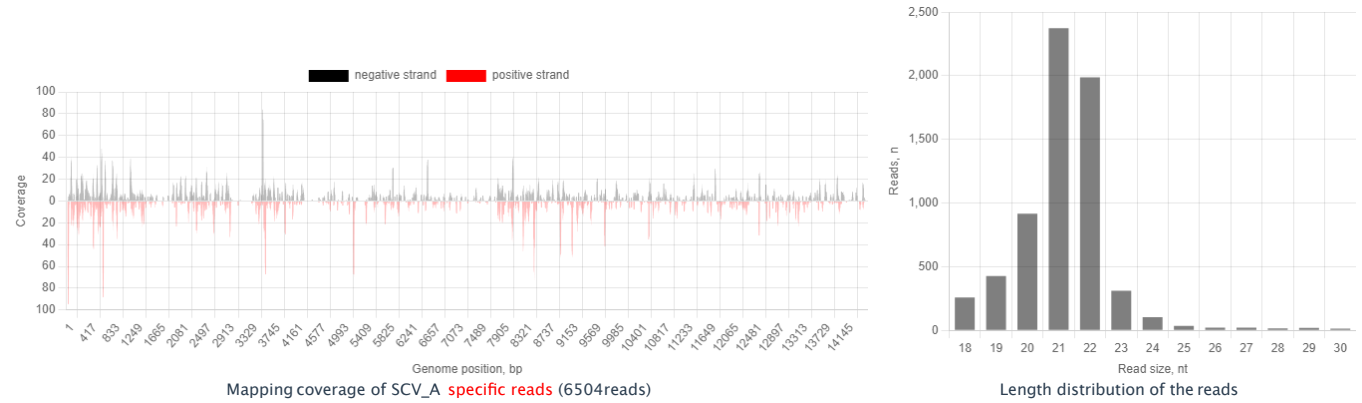

| Dataset | Input reads | Virus | Reference | Mapped reads | Mapped reads, % | RPKM | Forward/Reverse balance | Nonredundant, % | Strain specific | Strain specific, % from total mapped reads | Strain specific, RPKM |
|---------|-------------|-------|-----------|--------------|-----------------|------|-------------------------|-----------------|-----------------|--------------------------------------------|-----------------------|
| 1B_1    | 10000000    | SCV   | SCV_B     | 8134         | 0.081           | 55.9 | 0.7                     | 55.2            | 6824            | 83.9                                       | 46.9                  |

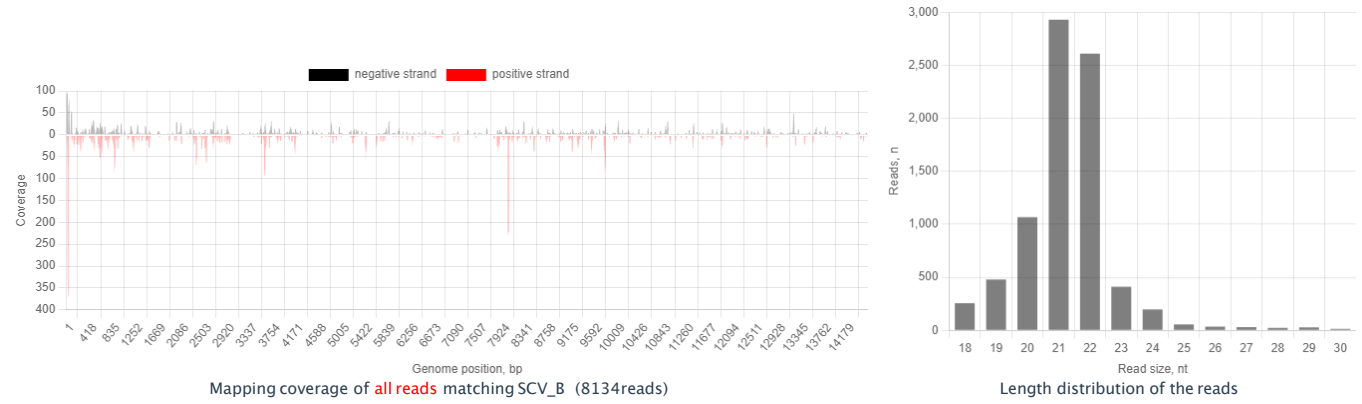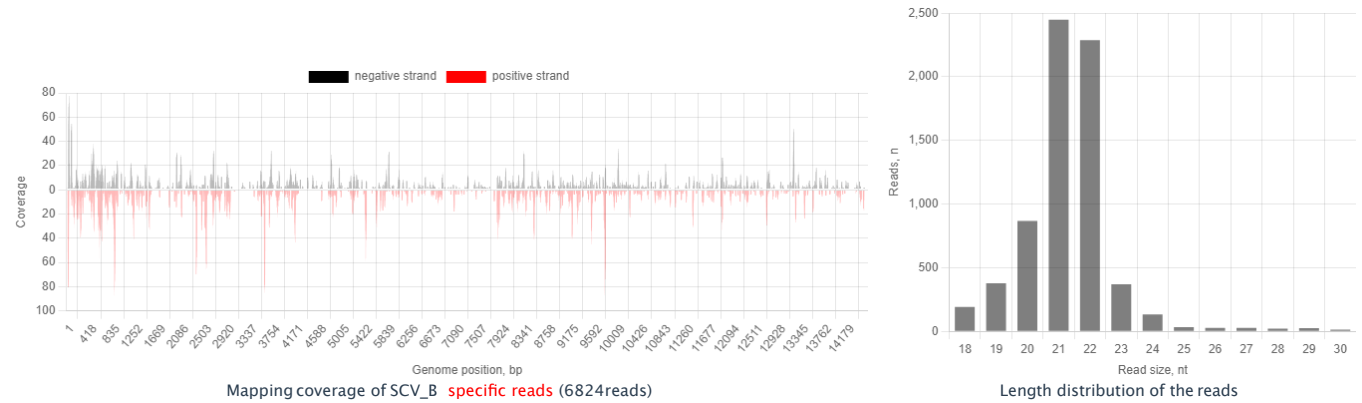

| Dataset | Input reads | Virus | Reference  | Mapped reads | Mapped reads, % | RPKM  | Forward/Reverse balance | Nonredundant, % | Strain specific | Strain specific, % from total mapped reads | Strain specific, RPKM |
|---------|-------------|-------|------------|--------------|-----------------|-------|-------------------------|-----------------|-----------------|--------------------------------------------|-----------------------|
| 1B_1    | 10000000    | SMoV  | SMoV_RNA1A | 10871        | 0.109           | 154.5 | 1.5                     | 40.2            | 5469            | 50.3                                       | 77.7                  |

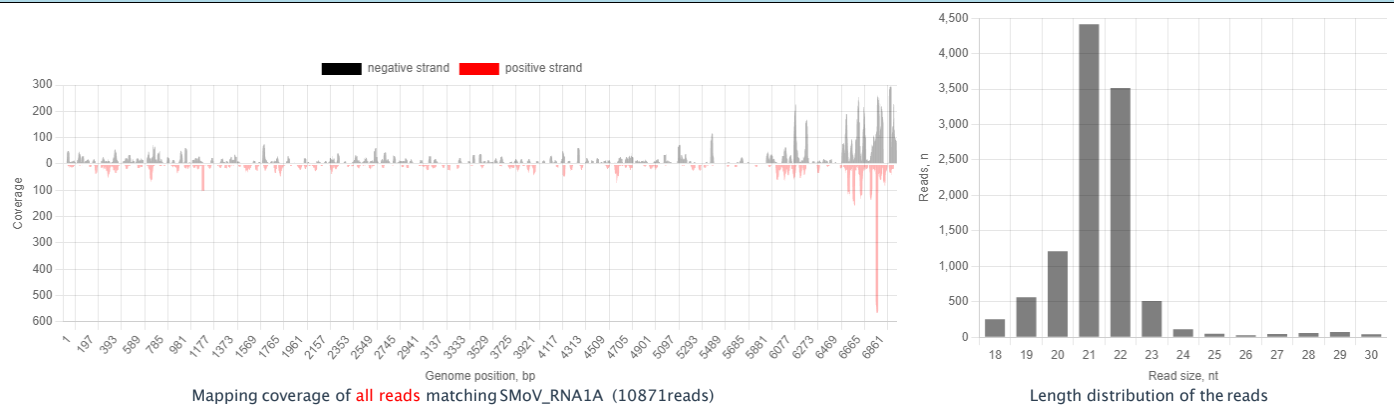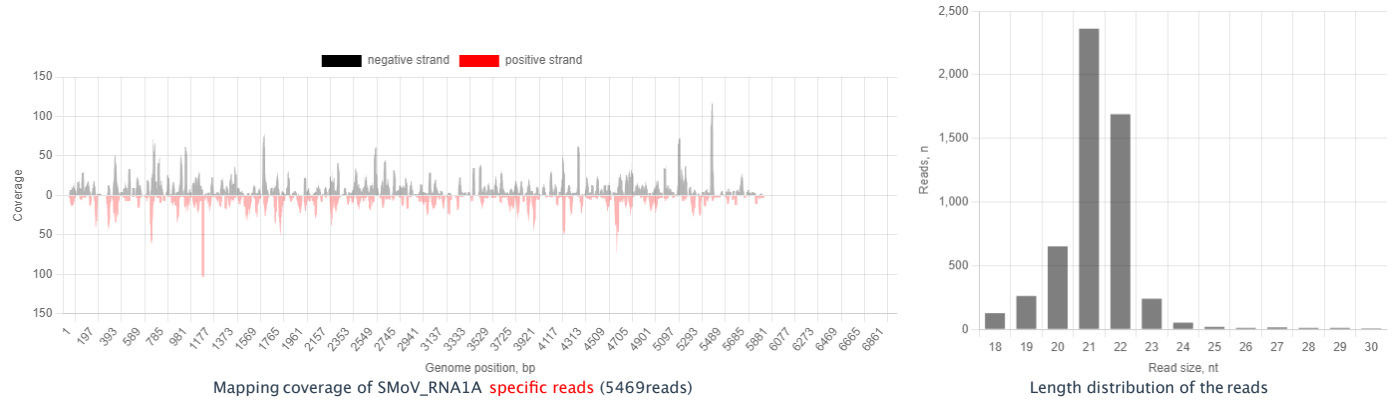

| Dataset | Input reads | Virus | Reference  | Mapped reads | Mapped reads, % | RPKM  | Forward/Reverse balance | Nonredundant, % | Strain specific | Strain specific, % from total mapped reads | Strain specific, RPKM |
|---------|-------------|-------|------------|--------------|-----------------|-------|-------------------------|-----------------|-----------------|--------------------------------------------|-----------------------|
| 1B_1    | 10000000    | SMoV  | SMoV_RNA1B | 10125        | 0.101           | 143.6 | 1.4                     | 39.1            | 4704            | 46.5                                       | 66.7                  |

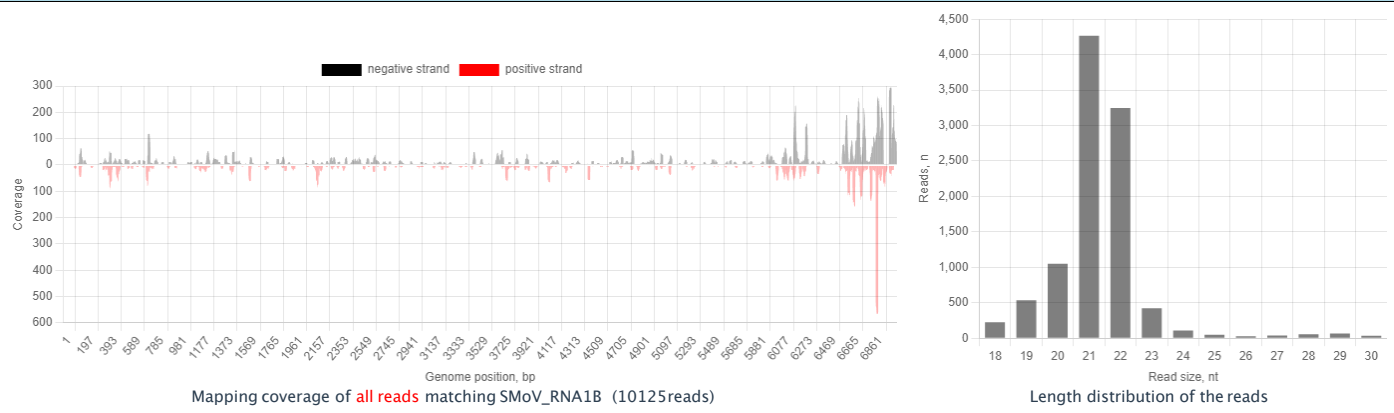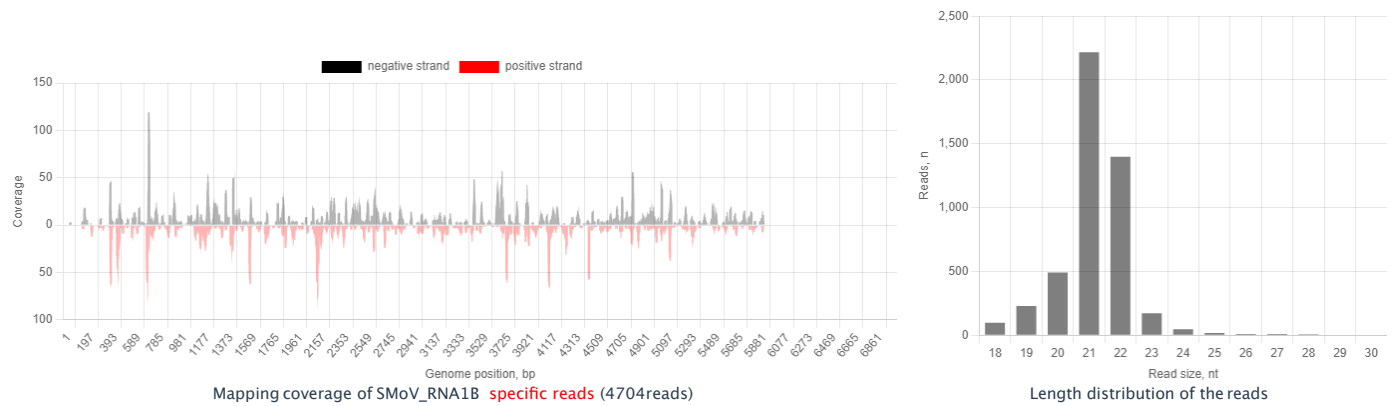

| Dataset | Input reads | Virus | Reference  | Mapped reads | Mapped reads, % | RPKM  | Forward/Reverse balance | Nonredundant, % | Strain specific | Strain specific, % from total mapped reads | Strain specific, RPKM |
|---------|-------------|-------|------------|--------------|-----------------|-------|-------------------------|-----------------|-----------------|--------------------------------------------|-----------------------|
| 1B_1    | 10000000    | SMoV  | SMoV_RNA1C | 10639        | 0.106           | 151.1 | 1.3                     | 39.4            | 5248            | 49.3                                       | 74.5                  |

| Dataset | Input reads | Virus | Reference | Mapped reads | Mapped reads, % | RPKM | Forward/Reverse balance | Nonredundant, % | Strain specific | Strain specific, % from total mapped reads | Strain specific, RPKM |
|---------|-------------|-------|-----------|--------------|-----------------|------|-------------------------|-----------------|-----------------|--------------------------------------------|-----------------------|
|---------|-------------|-------|-----------|--------------|-----------------|------|-------------------------|-----------------|-----------------|--------------------------------------------|-----------------------|

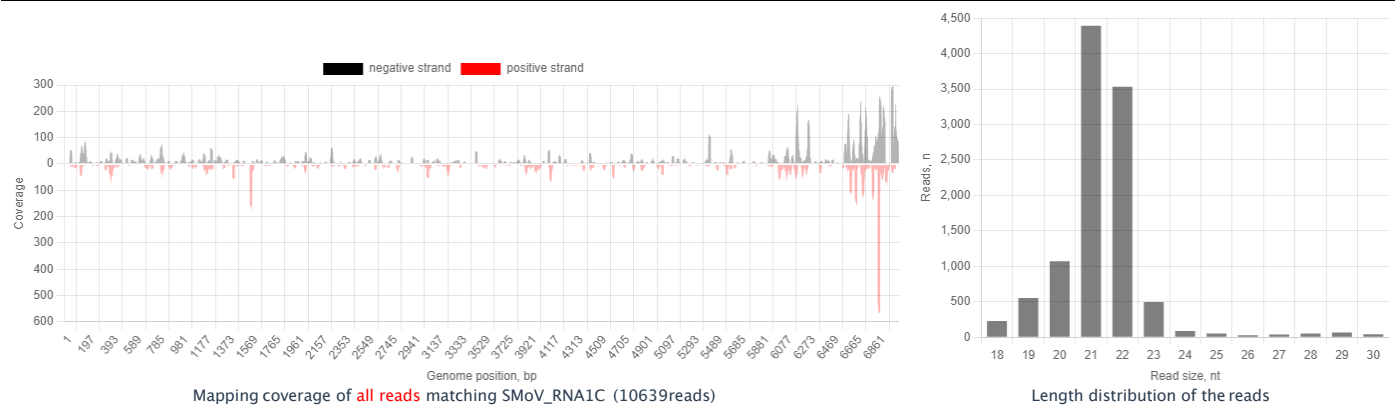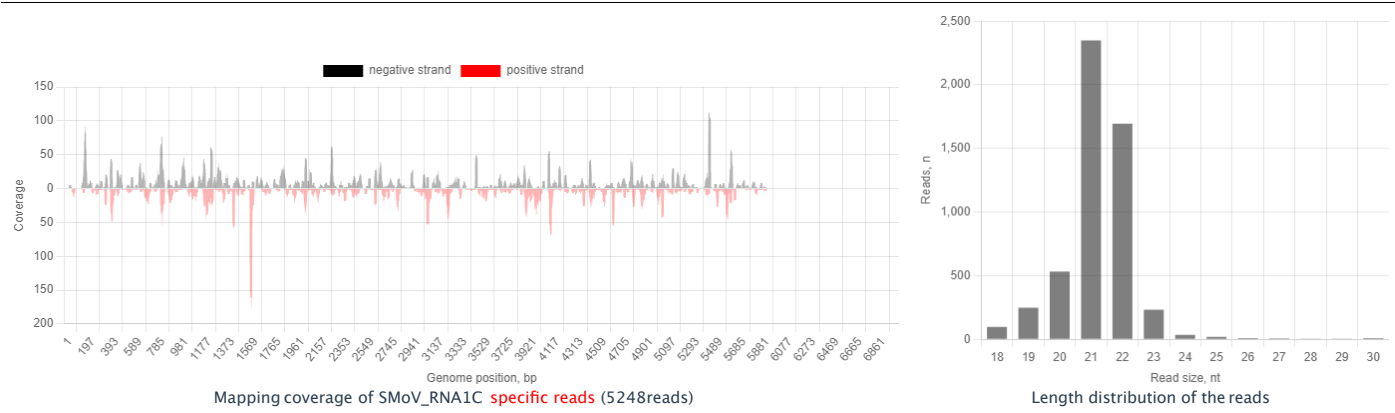

| Dataset | Input reads | Virus | Reference  | Mapped reads | Mapped reads, % | RPKM  | Forward/Reverse balance | Nonredundant, % | Strain specific | Strain specific, % from total mapped reads | Strain specific, RPKM |
|---------|-------------|-------|------------|--------------|-----------------|-------|-------------------------|-----------------|-----------------|--------------------------------------------|-----------------------|
| 1B_1    | 10000000    | SMoV  | SMoV_RNA2A | 7149         | 0.071           | 114.1 | 1.5                     | 43.4            | 4714            | 65.9                                       | 75.2                  |

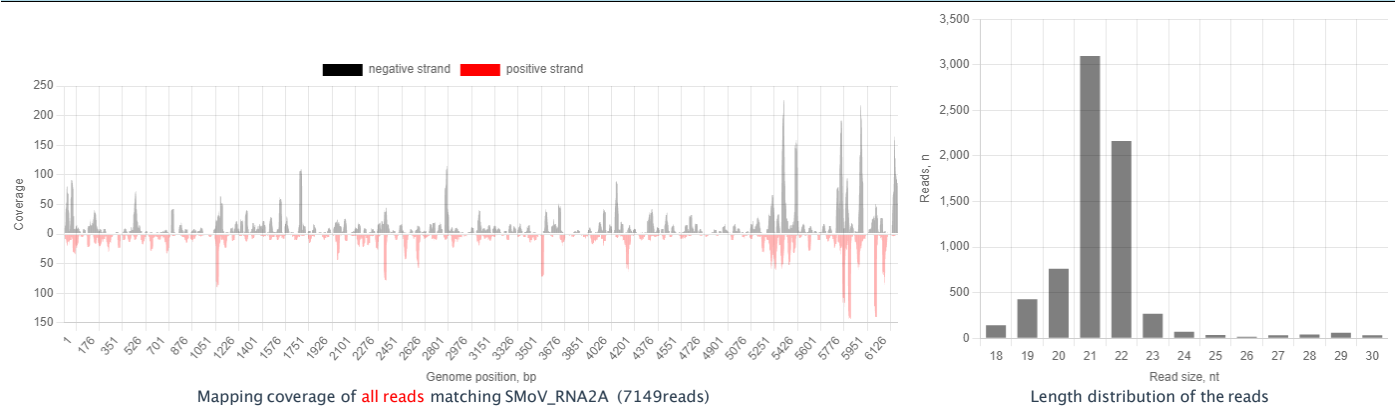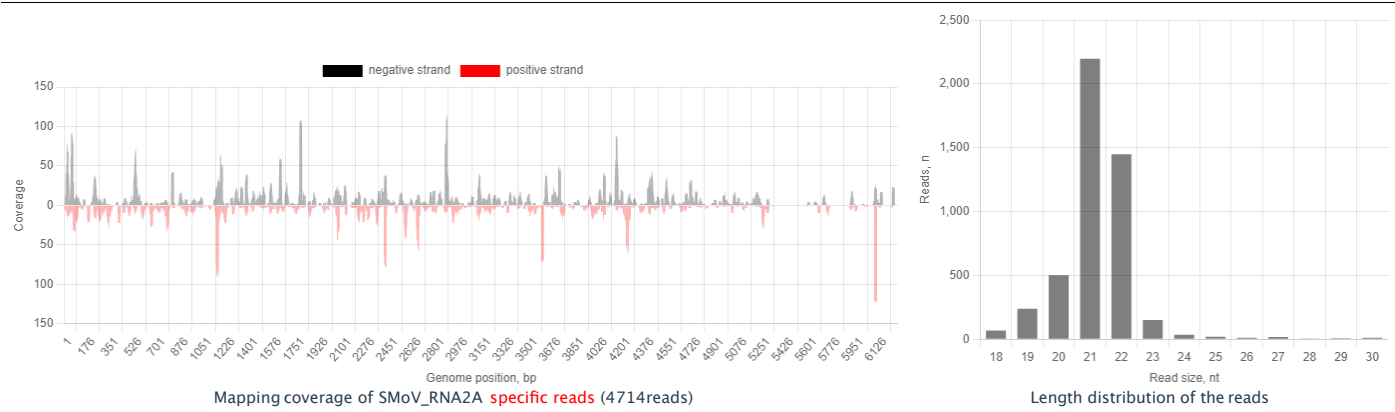

| Dataset | Input reads | Virus | Reference  | Mapped reads | Mapped reads, % | RPKM | Forward/Reverse balance | Nonredundant, % | Strain specific | Strain specific, % from total mapped reads | Strain specific, RPKM |
|---------|-------------|-------|------------|--------------|-----------------|------|-------------------------|-----------------|-----------------|--------------------------------------------|-----------------------|
| 1B_1    | 10000000    | SMoV  | SMoV_RNA2B | 6150         | 0.061           | 97.3 | 1.6                     | 43.7            | 3027            | 49.2                                       | 47.9                  |

| Dataset | Input reads | Virus | Reference | Mapped reads | Mapped reads, % | RPKM | Forward/Reverse balance | Nonredundant, % | Strain specific | Strain specific, % from total mapped reads | Strain specific, RPKM |
|---------|-------------|-------|-----------|--------------|-----------------|------|-------------------------|-----------------|-----------------|--------------------------------------------|-----------------------|
|---------|-------------|-------|-----------|--------------|-----------------|------|-------------------------|-----------------|-----------------|--------------------------------------------|-----------------------|

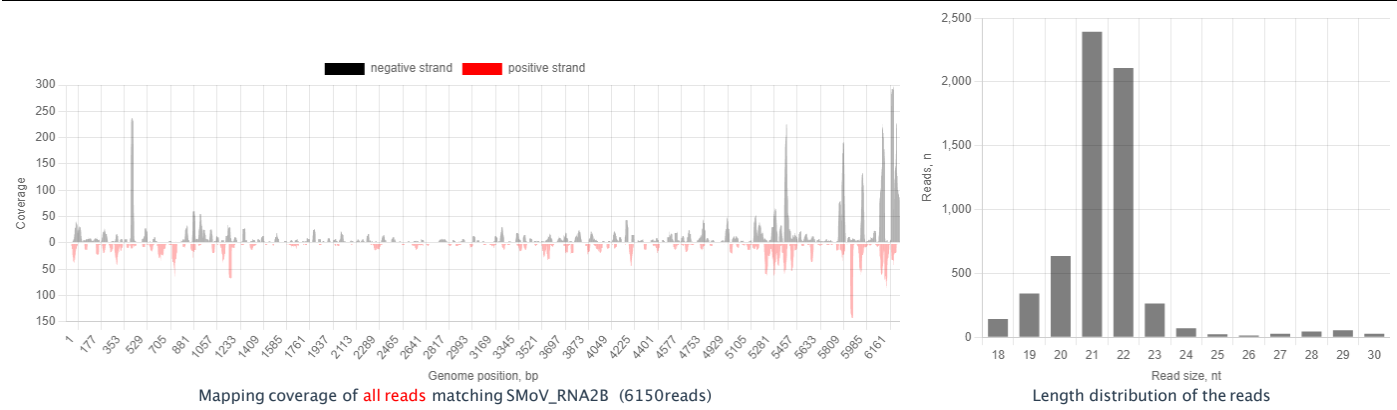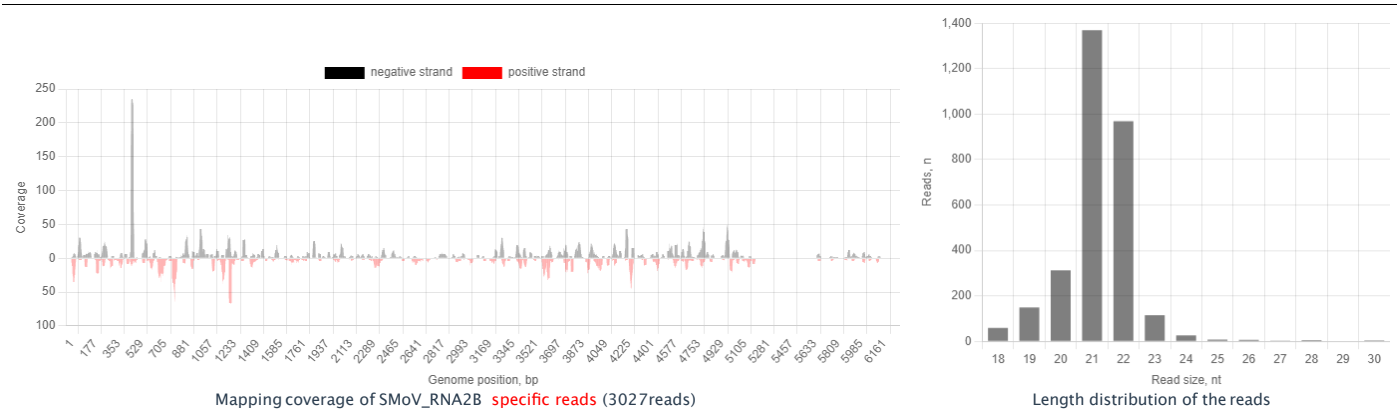

| Dataset | Input reads | Virus | Reference  | Mapped reads | Mapped reads, % | RPKM  | Forward/Reverse balance | Nonredundant, % | Strain specific | Strain specific, % from total mapped reads | Strain specific, RPKM |
|---------|-------------|-------|------------|--------------|-----------------|-------|-------------------------|-----------------|-----------------|--------------------------------------------|-----------------------|
| 1B_1    | 10000000    | SMoV  | SMoV_RNA2C | 9549         | 0.095           | 150.7 | 1.5                     | 38.4            | 4485            | 47.0                                       | 70.8                  |

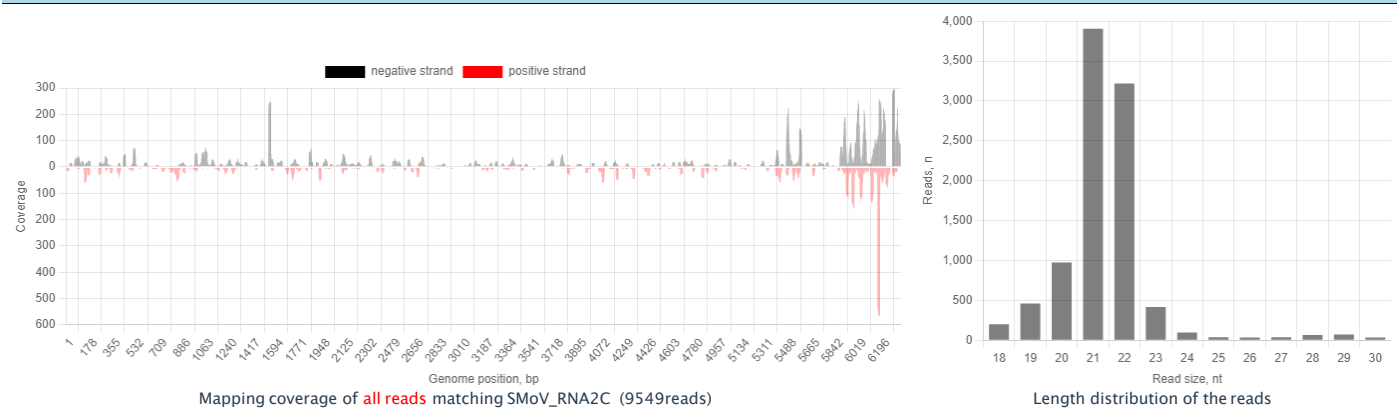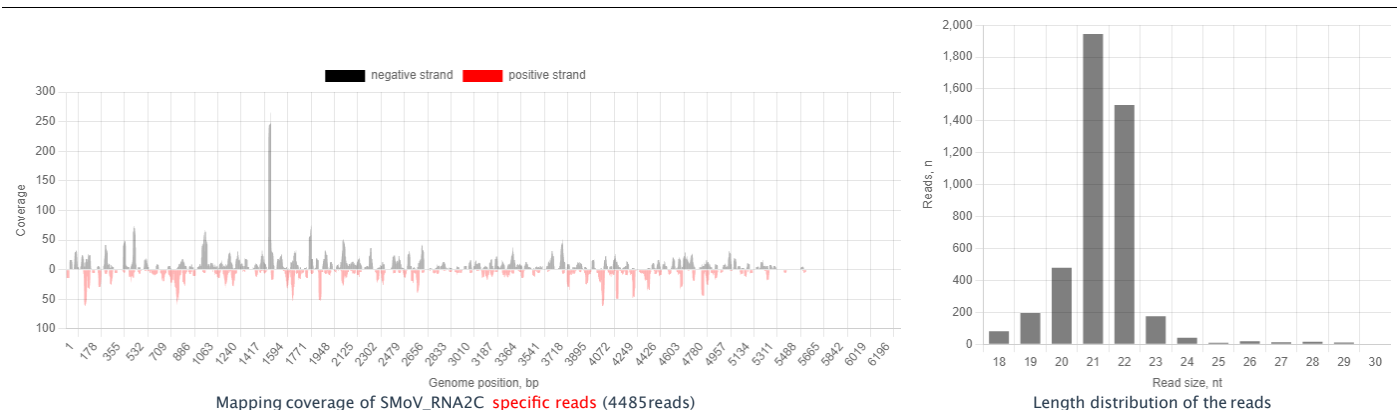

| Dataset | Input reads | Virus | Reference | Mapped reads | Mapped reads, % | RPKM | Forward/Reverse balance | Nonredundant, % | Strain specific | Strain specific, % from total mapped reads | Strain specific, RPKM |
|---------|-------------|-------|-----------|--------------|-----------------|------|-------------------------|-----------------|-----------------|--------------------------------------------|-----------------------|
| 1B_1    | 10000000    | StrV1 | StrV1_A   | 2694         | 0.027           | 19.0 | 0.9                     | 65.8            | 2267            | 84.1                                       | 16.0                  |

| Dataset | Input reads | Virus | Reference | Mapped reads | Mapped reads, % | RPKM | Forward/Reverse balance | Nonredundant, % | Strain specific | Strain specific, % from total mapped reads | Strain specific, RPKM |
|---------|-------------|-------|-----------|--------------|-----------------|------|-------------------------|-----------------|-----------------|--------------------------------------------|-----------------------|
|---------|-------------|-------|-----------|--------------|-----------------|------|-------------------------|-----------------|-----------------|--------------------------------------------|-----------------------|

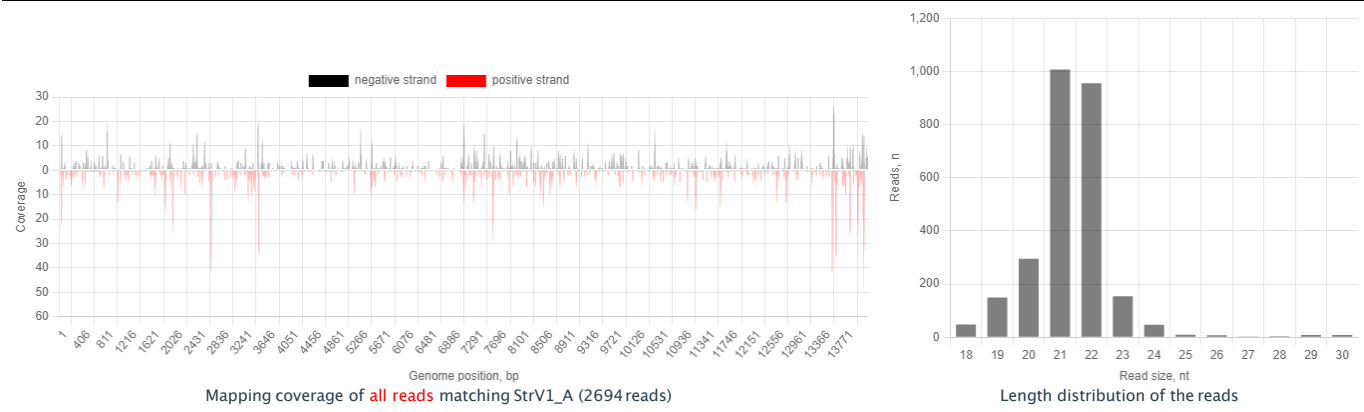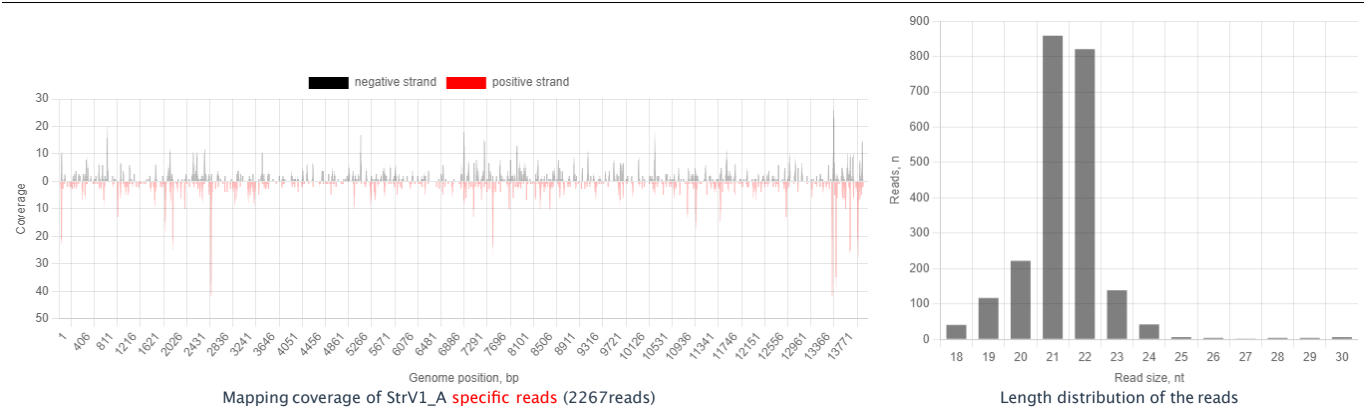

| Dataset | Input reads | Virus | Reference | Mapped reads | Mapped reads, % | RPKM | Forward/Reverse balance | Nonredundant, % | Strain specific | Strain specific, % from total mapped reads | Strain specific, RPKM |
|---------|-------------|-------|-----------|--------------|-----------------|------|-------------------------|-----------------|-----------------|--------------------------------------------|-----------------------|
| 1B_1    | 10000000    | StrV1 | StrV1_B   | 5882         | 0.059           | 41.9 | 1.1                     | 43.7            | 5741            | 97.6                                       | 40.9                  |

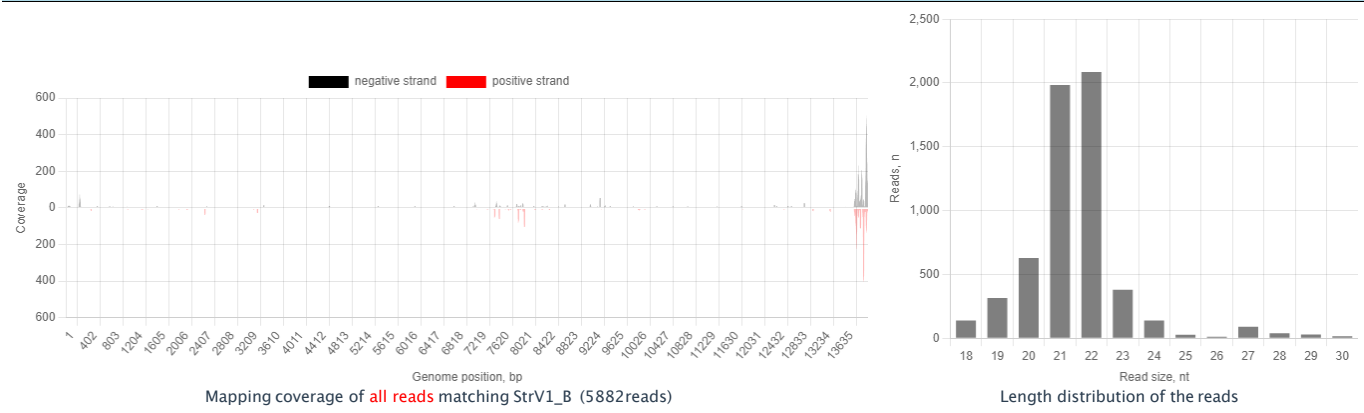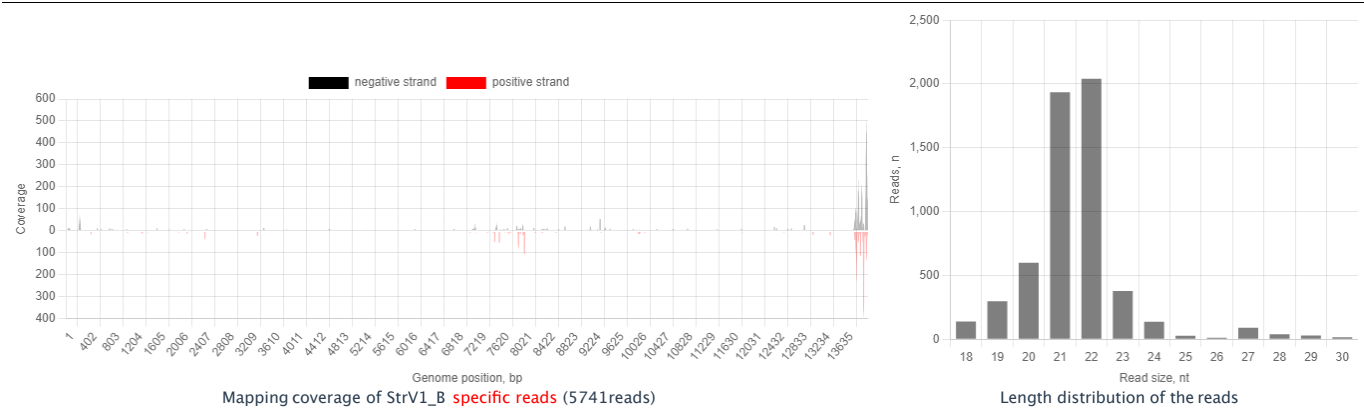

| Dataset | Input reads | Virus | Reference | Mapped reads | Mapped reads, % | RPKM | Forward/Reverse balance | Nonredundant, % | Strain specific | Strain specific, % from total mapped reads | Strain specific, RPKM |
|---------|-------------|-------|-----------|--------------|-----------------|------|-------------------------|-----------------|-----------------|--------------------------------------------|-----------------------|
| 1B_1    | 10000000    | StrV1 | StrV1_C   | 1158         | 0.012           | 8.1  | 0.9                     | 68.7            | 763             | 65.9                                       | 5.4                   |

| Dataset | Input reads | Virus | Reference | Mapped reads | Mapped reads, % | RPKM | Forward/Reverse balance | Nonredundant, % | Strain specific | Strain specific, % from total mapped reads | Strain specific, RPKM |
|---------|-------------|-------|-----------|--------------|-----------------|------|-------------------------|-----------------|-----------------|--------------------------------------------|-----------------------|
|---------|-------------|-------|-----------|--------------|-----------------|------|-------------------------|-----------------|-----------------|--------------------------------------------|-----------------------|

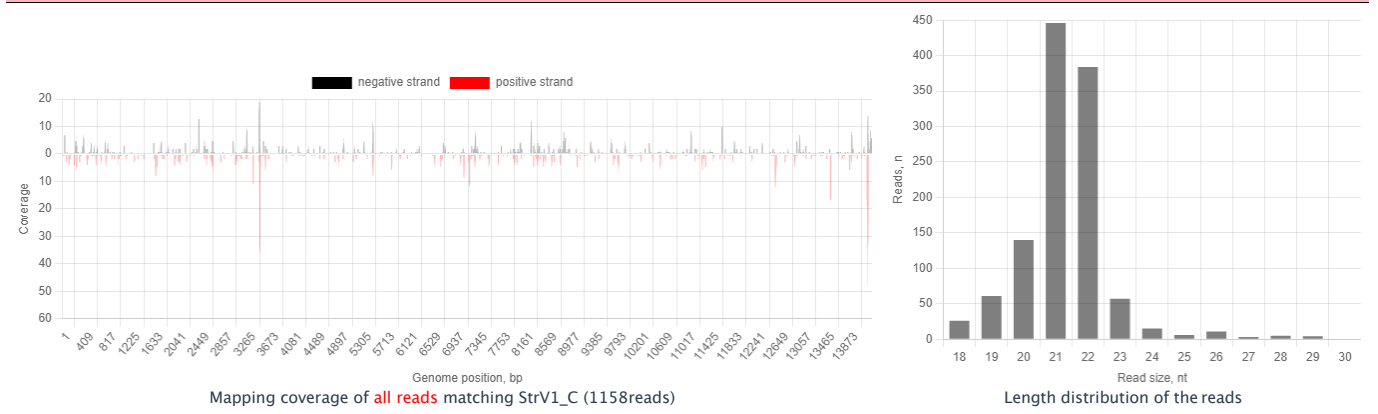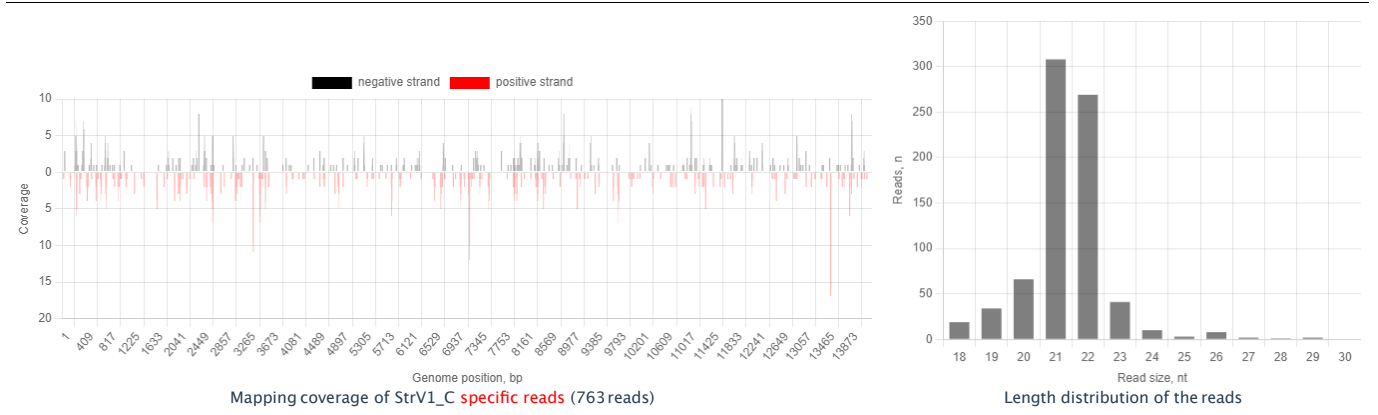

### Mappings of the 1B\_2 reads against the viral references.

| Dataset | Input reads | Virus | Reference | Mapped reads | Mapped reads, % | RPKM | Forward/Reverse balance | Nonredundant, % | Strain specific | Strain specific, % from total mapped reads | Strain specific, RPKM |
|---------|-------------|-------|-----------|--------------|-----------------|------|-------------------------|-----------------|-----------------|--------------------------------------------|-----------------------|
| 1B_2    | 10000000    | SCV   | SCV_A     | 1523         | 0.015           | 10.5 | 0.8                     | 46.7            | 6504            | 427.1                                      | 9.0                   |

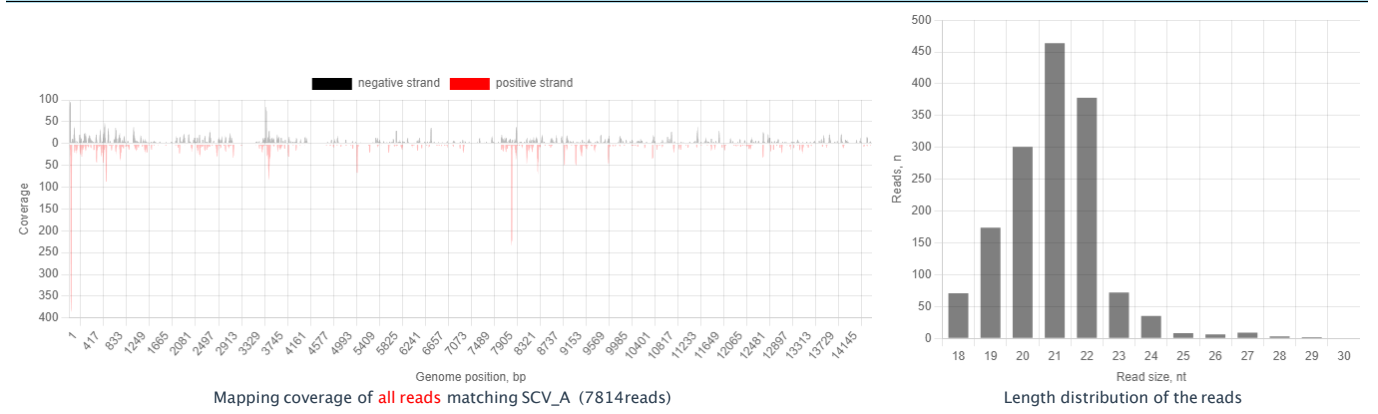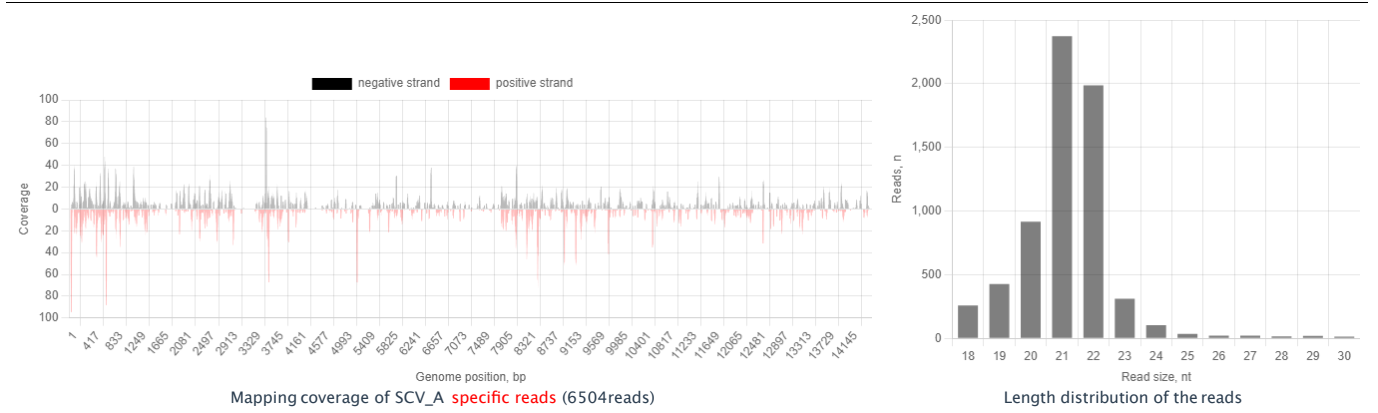

| Dataset | Input reads | Virus | Reference | Mapped reads | Mapped reads, % | RPKM | Forward/Reverse balance | Nonredundant, % | Strain specific | Strain specific, % from total mapped reads | Strain specific, RPKM |
|---------|-------------|-------|-----------|--------------|-----------------|------|-------------------------|-----------------|-----------------|--------------------------------------------|-----------------------|
| 1B_2    | 10000000    | SCV   | SCV_B     | 1046         | 0.010           | 7.2  | 0.6                     | 45.4            | 6824            | 652.4                                      | 5.7                   |

| Dataset | Input reads | Virus | Reference | Mapped reads | Mapped reads, % | RPKM | Forward/Reverse balance | Nonredundant, % | Strain specific | Strain specific, % from total mapped reads | Strain specific, RPKM |
|---------|-------------|-------|-----------|--------------|-----------------|------|-------------------------|-----------------|-----------------|--------------------------------------------|-----------------------|
|---------|-------------|-------|-----------|--------------|-----------------|------|-------------------------|-----------------|-----------------|--------------------------------------------|-----------------------|

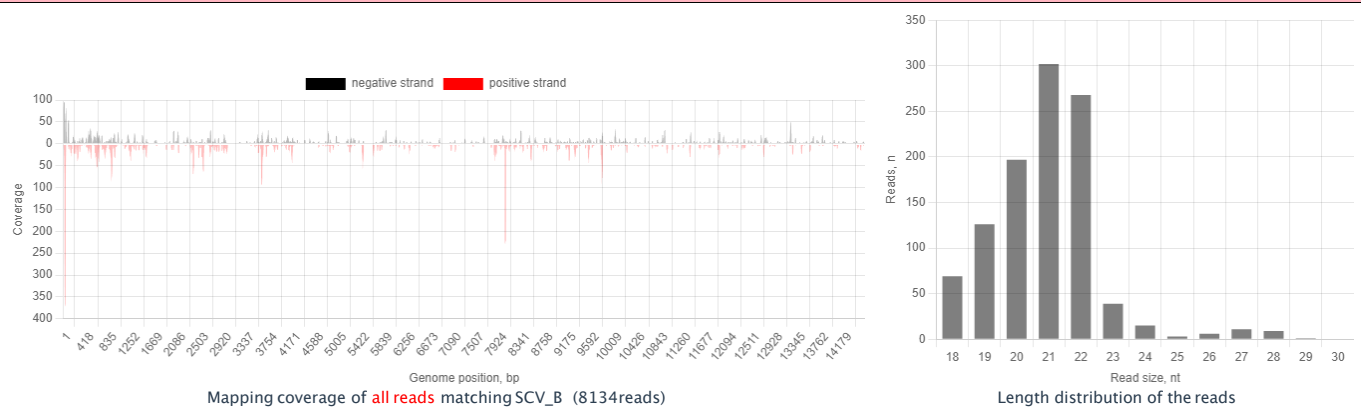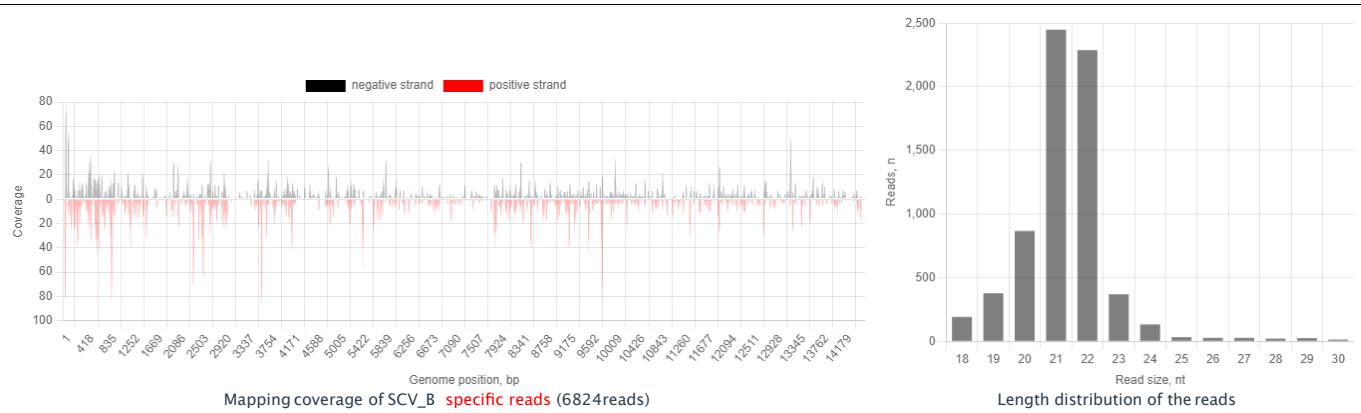

| Dataset | Input reads | Virus | Reference  | Mapped reads | Mapped reads, % | RPKM  | Forward/Reverse balance | Nonredundant, % | Strain specific | Strain specific, % from total mapped reads | Strain specific, RPKM |
|---------|-------------|-------|------------|--------------|-----------------|-------|-------------------------|-----------------|-----------------|--------------------------------------------|-----------------------|
| 1B_2    | 10000000    | SMoV  | SMoV_RNA1A | 7716         | 0.077           | 109.6 | 1.8                     | 30.5            | 5469            | 70.9                                       | 55.9                  |

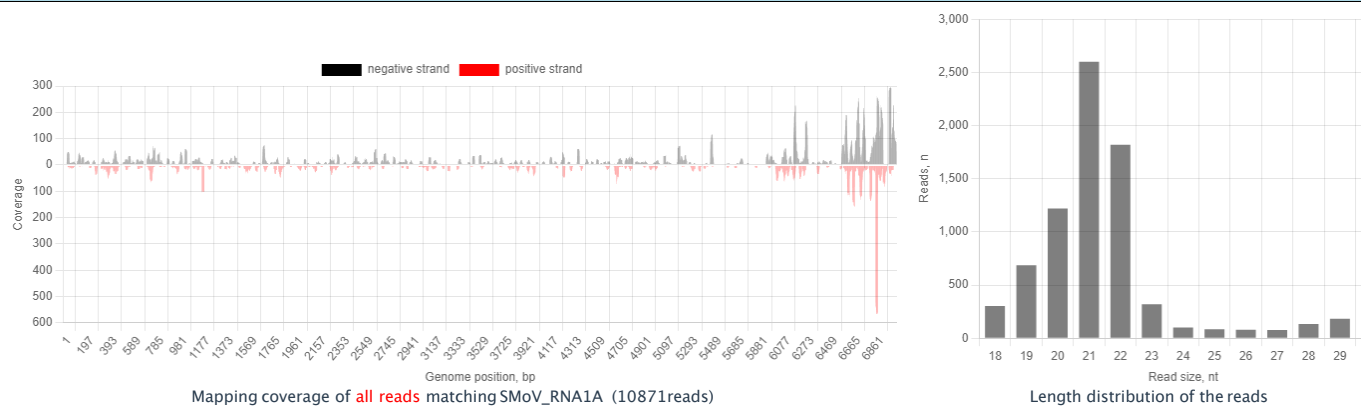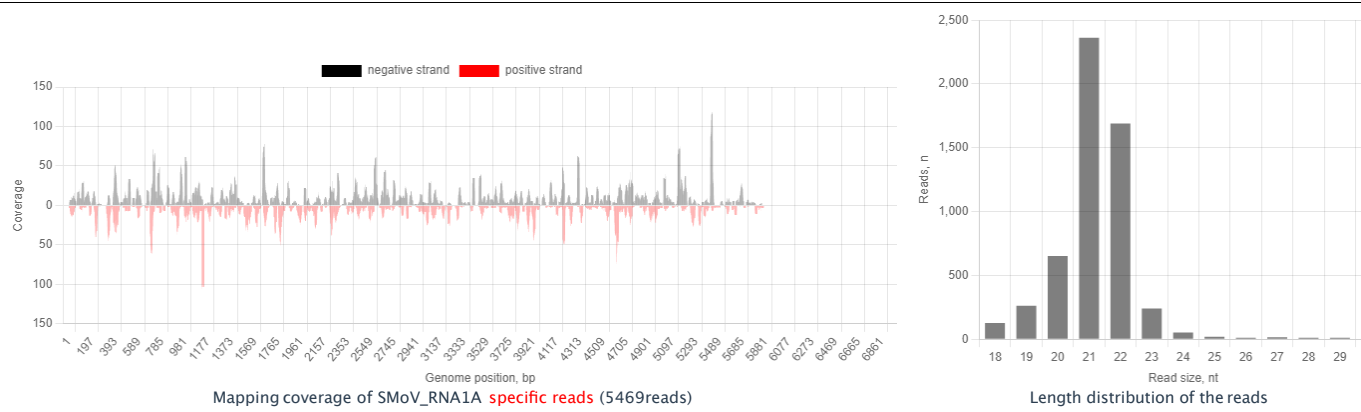

| Dataset | Input reads | Virus | Reference  | Mapped reads | Mapped reads, % | RPKM  | Forward/Reverse balance | Nonredundant, % | Strain specific | Strain specific, % from total mapped reads | Strain specific, RPKM |
|---------|-------------|-------|------------|--------------|-----------------|-------|-------------------------|-----------------|-----------------|--------------------------------------------|-----------------------|
| 1B_2    | 10000000    | SMoV  | SMoV_RNA1B | 7121         | 0.071           | 101.0 | 1.6                     | 30.9            | 4704            | 66.1                                       | 47.1                  |

| Dataset | Input reads | Virus | Reference | Mapped reads | Mapped reads, % | RPKM | Forward/Reverse balance | Nonredundant, % | Strain specific | Strain specific, % from total mapped reads | Strain specific, RPKM |
|---------|-------------|-------|-----------|--------------|-----------------|------|-------------------------|-----------------|-----------------|--------------------------------------------|-----------------------|
|---------|-------------|-------|-----------|--------------|-----------------|------|-------------------------|-----------------|-----------------|--------------------------------------------|-----------------------|

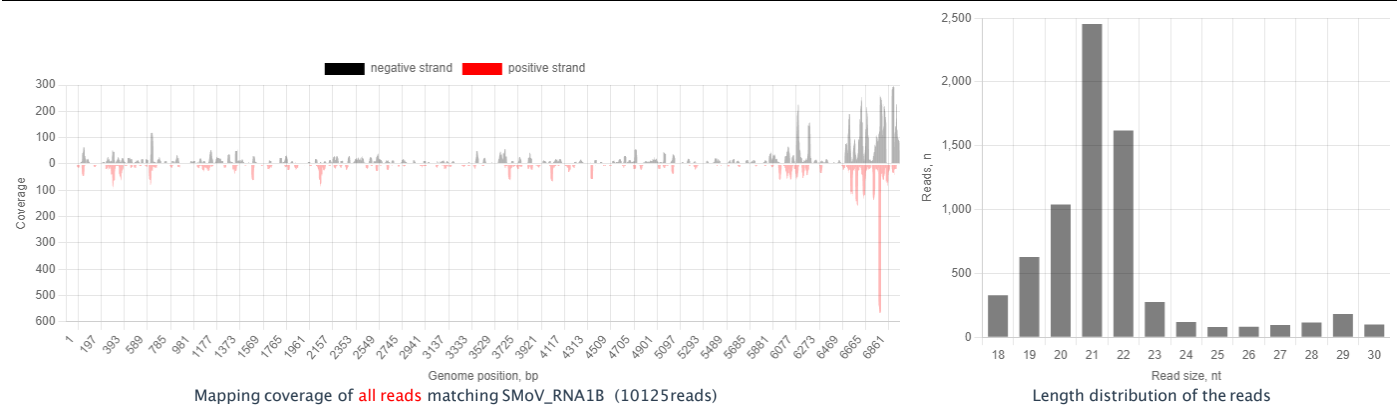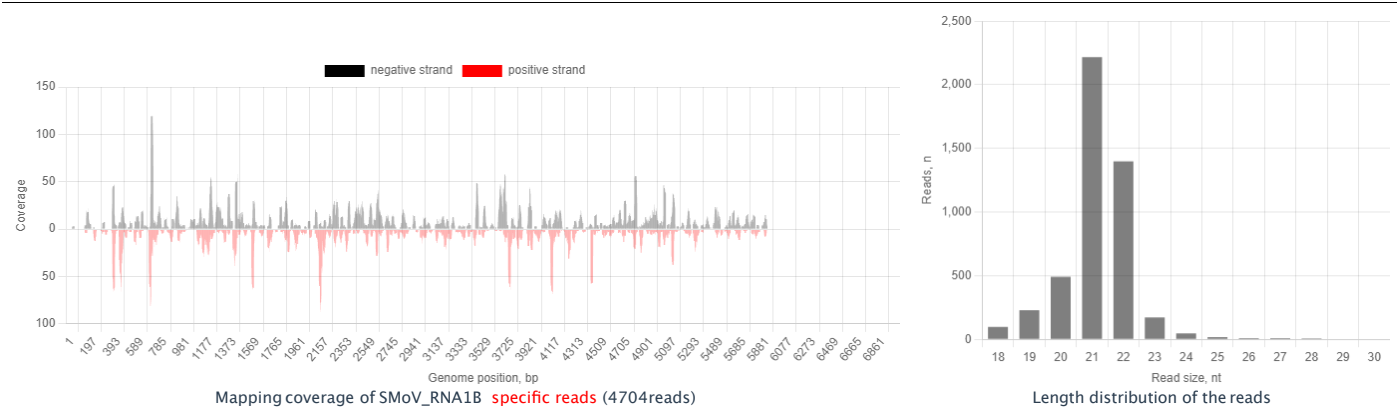

| Dataset | Input reads | Virus | Reference  | Mapped reads | Mapped reads, % | RPKM  | Forward/Reverse balance | Nonredundant, % | Strain specific | Strain specific, % from total mapped reads | Strain specific, RPKM |
|---------|-------------|-------|------------|--------------|-----------------|-------|-------------------------|-----------------|-----------------|--------------------------------------------|-----------------------|
| 1B_2    | 10000000    | SMoV  | SMoV_RNA1C | 7443         | 0.074           | 105.7 | 1.7                     | 31.3            | 5248            | 70.5                                       | 51.6                  |

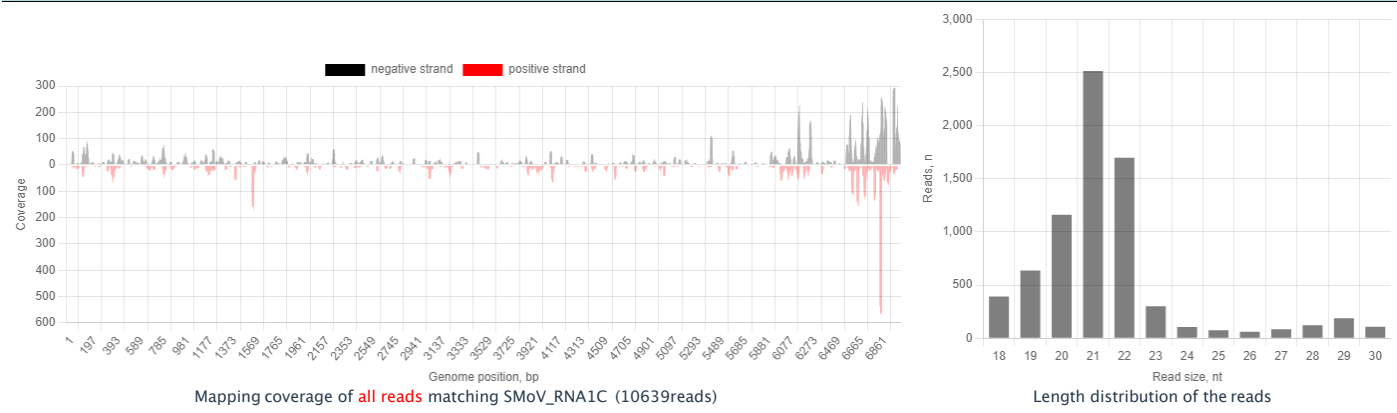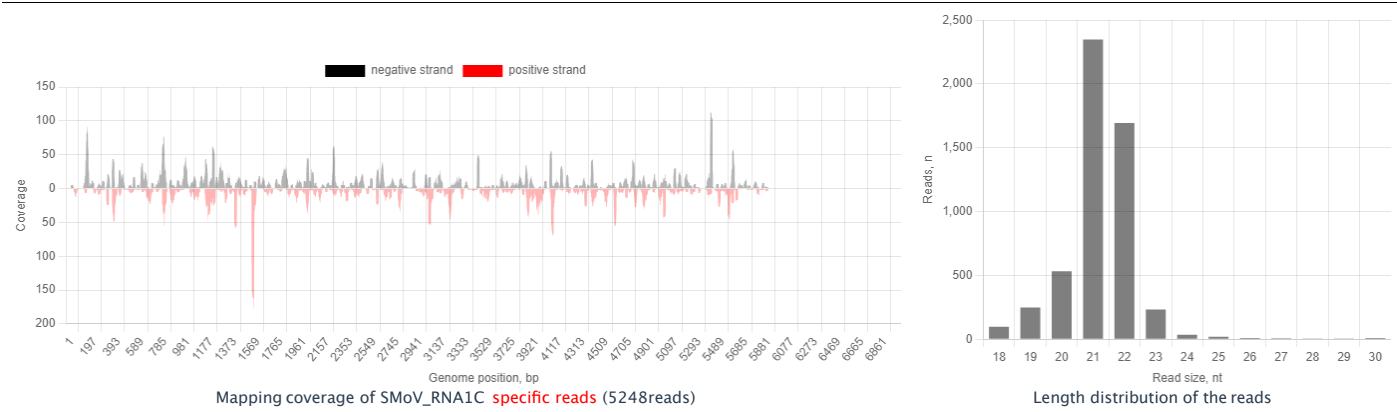

| Dataset | Input reads | Virus | Reference  | Mapped reads | Mapped reads, % | RPKM | Forward/Reverse balance | Nonredundant, % | Strain specific | Strain specific, % from total mapped reads | Strain specific, RPKM |
|---------|-------------|-------|------------|--------------|-----------------|------|-------------------------|-----------------|-----------------|--------------------------------------------|-----------------------|
| 1B_2    | 10000000    | SMoV  | SMoV_RNA2A | 5073         | 0.051           | 80.9 | 1.7                     | 34.5            | 4714            | 92.9                                       | 52.8                  |



| Dataset | Input reads | Virus | Reference | Mapped reads | Mapped reads, % | RPKM | Forward/Reverse balance | Nonredundant, % | Strain specific | Strain specific, % from total mapped reads | Strain specific, RPKM |
|---------|-------------|-------|-----------|--------------|-----------------|------|-------------------------|-----------------|-----------------|--------------------------------------------|-----------------------|
|---------|-------------|-------|-----------|--------------|-----------------|------|-------------------------|-----------------|-----------------|--------------------------------------------|-----------------------|

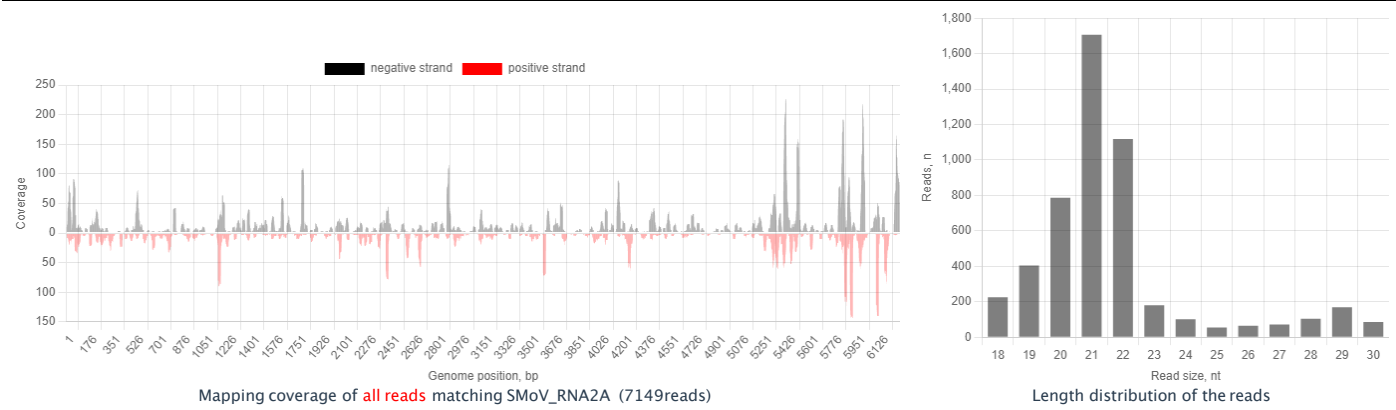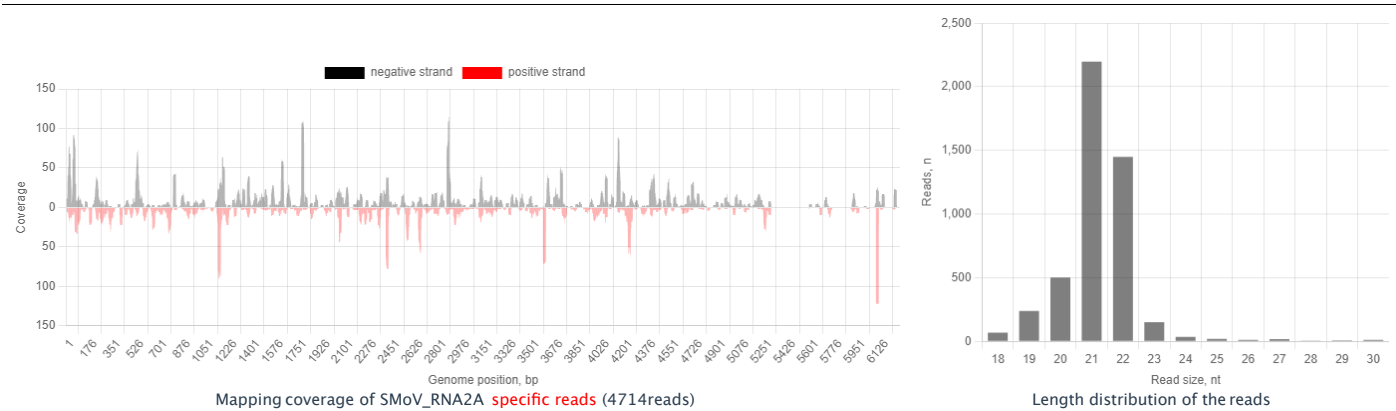

| Dataset | Input reads | Virus | Reference  | Mapped reads | Mapped reads, % | RPKM | Forward/Reverse balance | Nonredundant, % | Strain specific | Strain specific, % from total mapped reads | Strain specific, RPKM |
|---------|-------------|-------|------------|--------------|-----------------|------|-------------------------|-----------------|-----------------|--------------------------------------------|-----------------------|
| 1B_2    | 10000000    | SMoV  | SMoV_RNA2B | 4059         | 0.041           | 64.2 | 2.0                     | 34.1            | 3027            | 74.6                                       | 29.2                  |

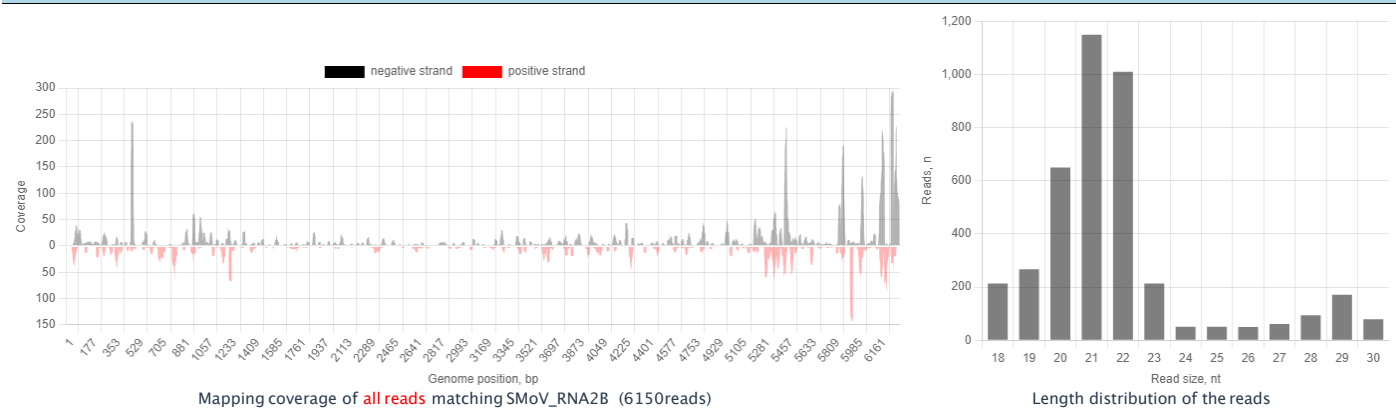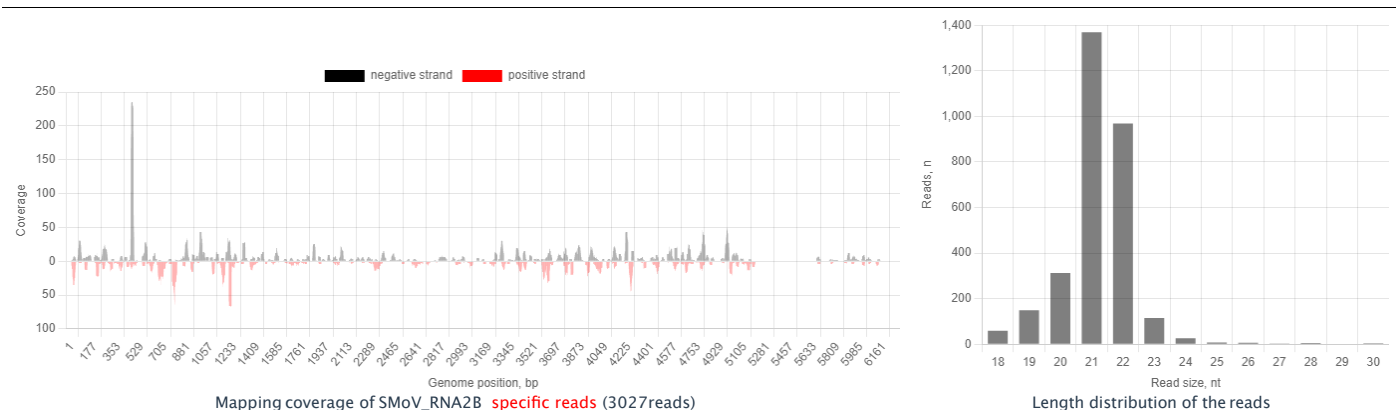

| Dataset | Input reads | Virus | Reference  | Mapped reads | Mapped reads, % | RPKM | Forward/Reverse balance | Nonredundant, % | Strain specific | Strain specific, % from total mapped reads | Strain specific, RPKM |
|---------|-------------|-------|------------|--------------|-----------------|------|-------------------------|-----------------|-----------------|--------------------------------------------|-----------------------|
| 1B_2    | 10000000    | SMoV  | SMoV_RNA2C | 5894         | 0.059           | 92.8 | 1.7                     | 29.4            | 4485            | 76.1                                       | 35.2                  |

| Dataset | Input reads | Virus | Reference | Mapped reads | Mapped reads, % | RPKM | Forward/Reverse balance | Nonredundant, % | Strain specific | Strain specific, % from total mapped reads | Strain specific, RPKM |
|---------|-------------|-------|-----------|--------------|-----------------|------|-------------------------|-----------------|-----------------|--------------------------------------------|-----------------------|
|---------|-------------|-------|-----------|--------------|-----------------|------|-------------------------|-----------------|-----------------|--------------------------------------------|-----------------------|

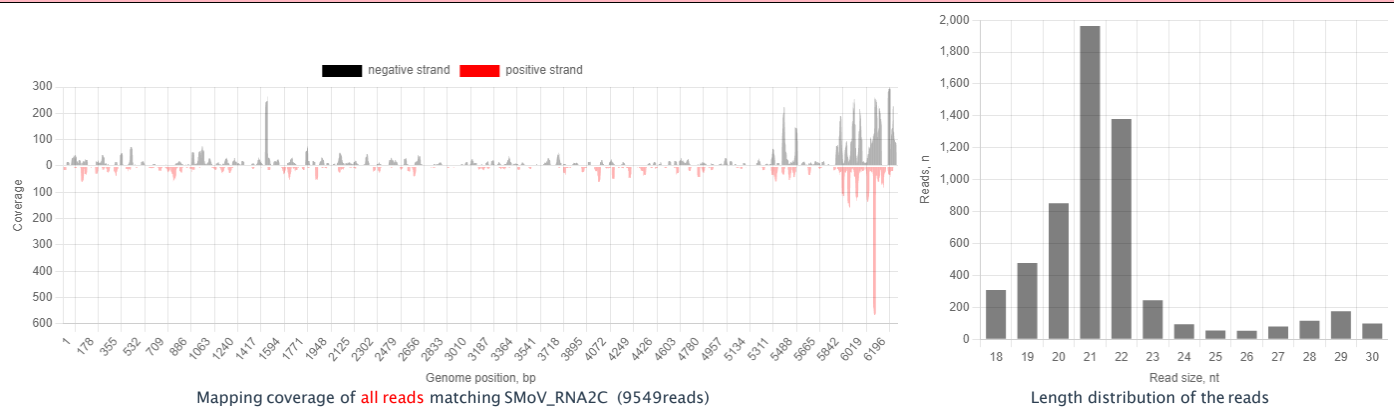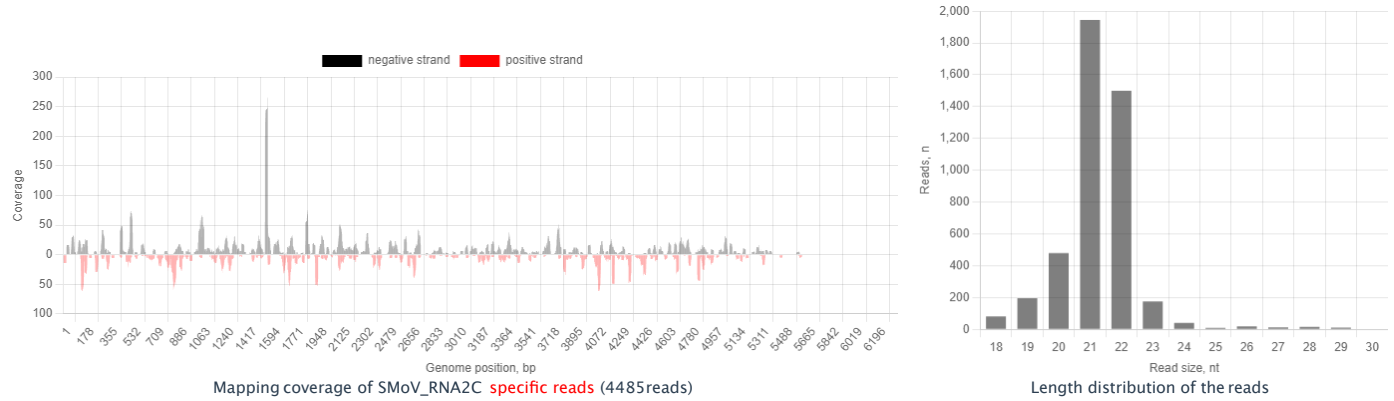

| Dataset | Input reads | Virus | Reference | Mapped reads | Mapped reads, % | RPKM | Forward/Reverse balance | Nonredundant, % | Strain specific | Strain specific, % from total mapped reads | Strain specific, RPKM |
|---------|-------------|-------|-----------|--------------|-----------------|------|-------------------------|-----------------|-----------------|--------------------------------------------|-----------------------|
| 1B_2    | 10000000    | StrV1 | StrV1_A   | 1710         | 0.017           | 12.1 | 1.0                     | 41.9            | 2267            | 132.6                                      | 9.8                   |

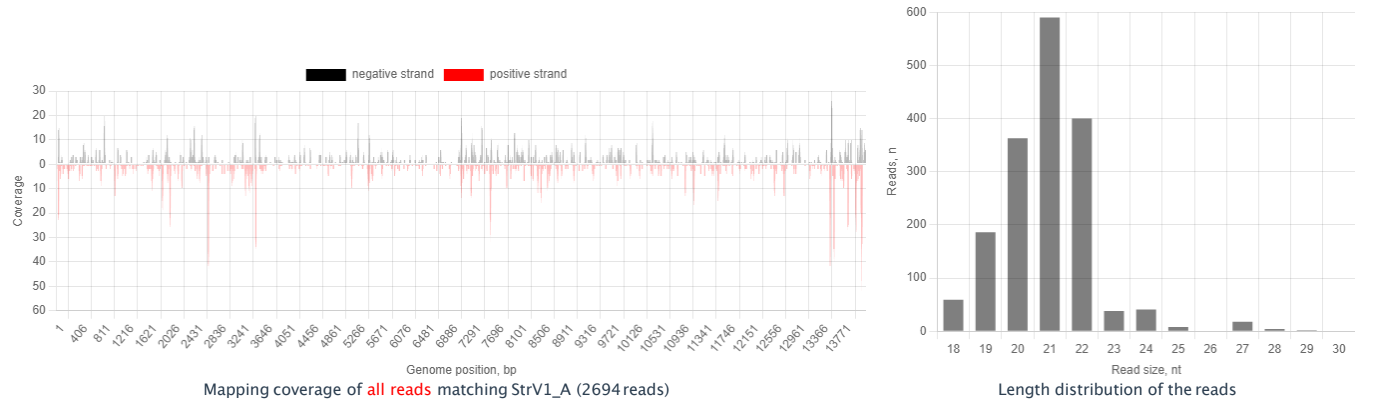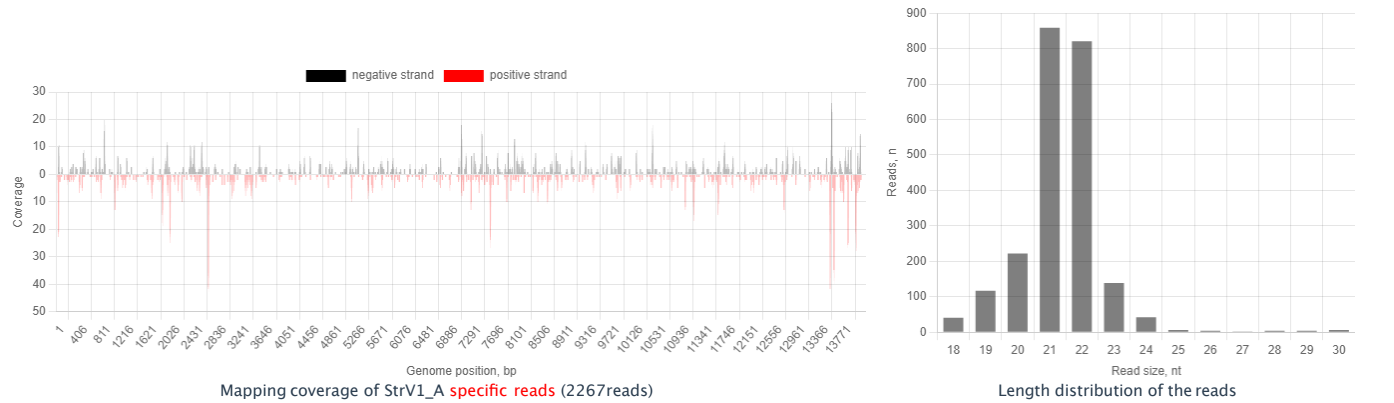

| Dataset | Input reads | Virus | Reference | Mapped reads | Mapped reads, % | RPKM | Forward/Reverse balance | Nonredundant, % | Strain specific | Strain specific, % from total mapped reads | Strain specific, RPKM |
|---------|-------------|-------|-----------|--------------|-----------------|------|-------------------------|-----------------|-----------------|--------------------------------------------|-----------------------|
| 1B_2    | 10000000    | StrV1 | StrV1_B   | 4273         | 0.043           | 30.5 | 1.4                     | 30.4            | 5741            | 134.4                                      | 29.4                  |

| Dataset | Input reads | Virus | Reference | Mapped reads | Mapped reads, % | RPKM | Forward/Reverse balance | Nonredundant, % | Strain specific | Strain specific, % from total mapped reads | Strain specific, RPKM |
|---------|-------------|-------|-----------|--------------|-----------------|------|-------------------------|-----------------|-----------------|--------------------------------------------|-----------------------|
|---------|-------------|-------|-----------|--------------|-----------------|------|-------------------------|-----------------|-----------------|--------------------------------------------|-----------------------|

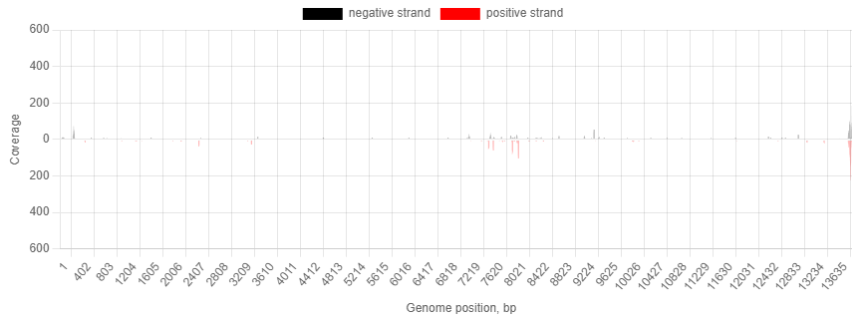

Mapping coverage of **all reads** matching StrV1\_B (5882reads)

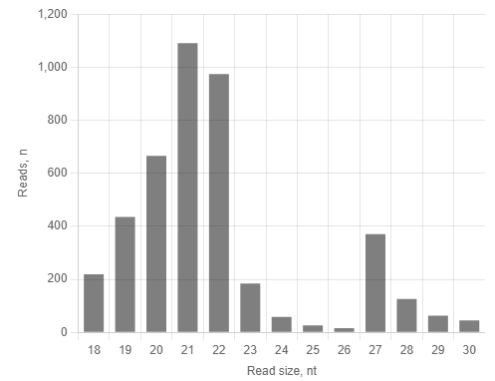

Length distribution of the reads

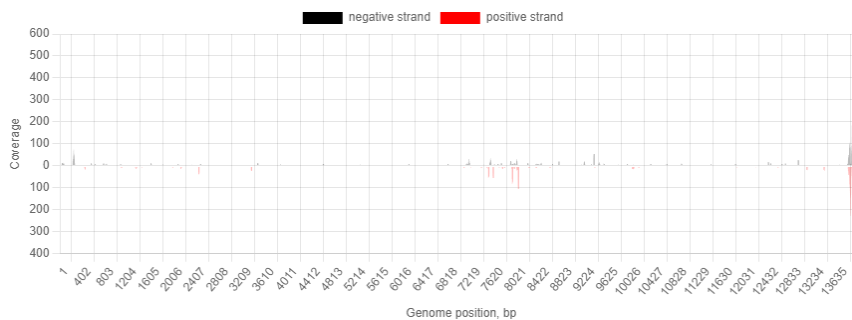

Mapping coverage of StrV1\_B **specific reads** (5741reads)

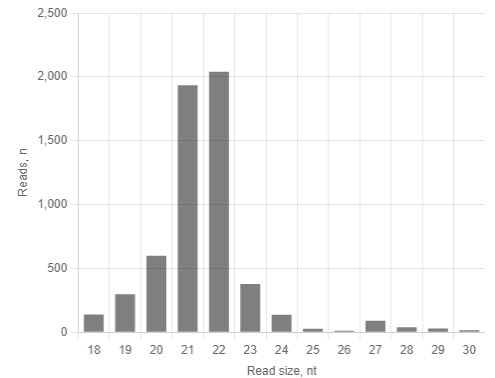

Length distribution of the reads

| Dataset | Input reads | Virus | Reference | Mapped reads | Mapped reads, % | RPKM | Forward/Reverse balance | Nonredundant, % | Strain specific | Strain specific, % from total mapped reads | Strain specific, RPKM |
|---------|-------------|-------|-----------|--------------|-----------------|------|-------------------------|-----------------|-----------------|--------------------------------------------|-----------------------|
| 1B_2    | 10000000    | StrV1 | StrV1_C   | 1285         | 0.013           | 9.0  | 1.1                     | 46.1            | 763             | 59.4                                       | 7.1                   |

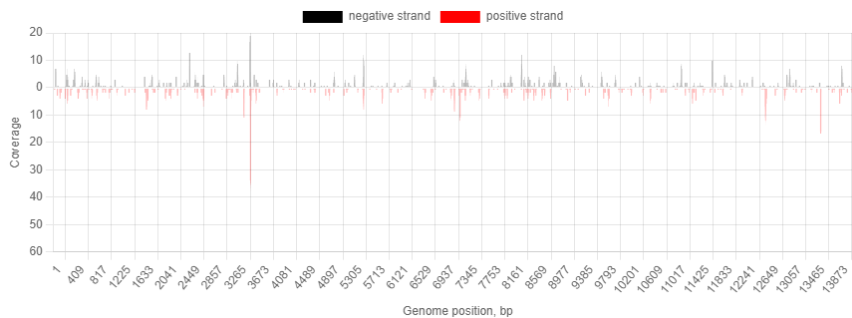

Mapping coverage of **all reads** matching StrV1\_C (1158reads)

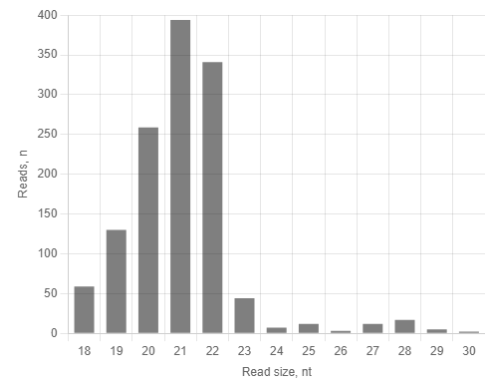

Length distribution of the reads

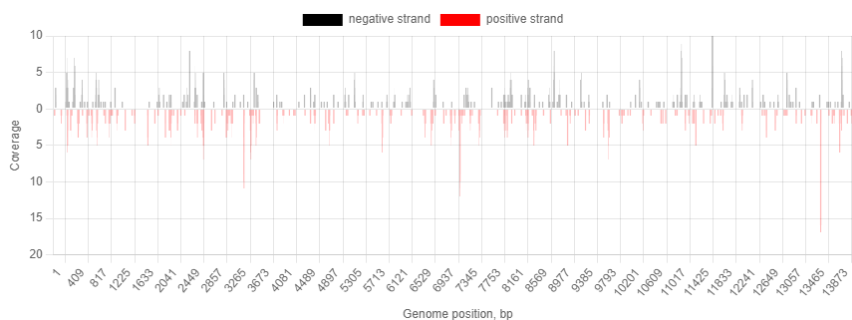

Mapping coverage of StrV1\_C **specific reads** (763 reads)

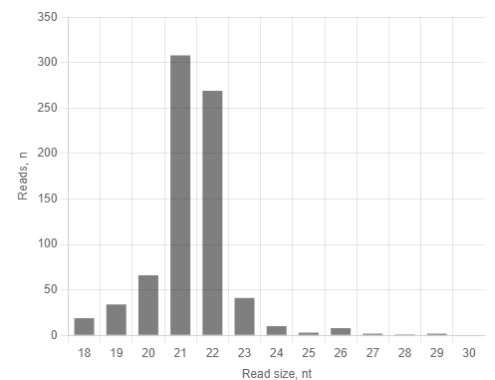

Length distribution of the reads

## Mappings of the 1B\_3 reads against the viral references.

| Dataset | Input reads | Virus | Reference | Mapped reads | Mapped reads, % | RPKM | Forward/Reverse balance | Nonredundant, % | Strain specific | Strain specific, % from total mapped reads | Strain specific, RPKM |
|---------|-------------|-------|-----------|--------------|-----------------|------|-------------------------|-----------------|-----------------|--------------------------------------------|-----------------------|
| 1B_3    | 10000000    | SCV   | SCV_A     | 2547         | 0.025           | 17.5 | 0.7                     | 25.2            | 6504            | 255.4                                      | 15.4                  |

| Dataset | Input reads | Virus | Reference | Mapped reads | Mapped reads, % | RPKM | Forward/Reverse balance | Nonredundant, % | Strain specific | Strain specific, % from total mapped reads | Strain specific, RPKM |
|---------|-------------|-------|-----------|--------------|-----------------|------|-------------------------|-----------------|-----------------|--------------------------------------------|-----------------------|
|---------|-------------|-------|-----------|--------------|-----------------|------|-------------------------|-----------------|-----------------|--------------------------------------------|-----------------------|

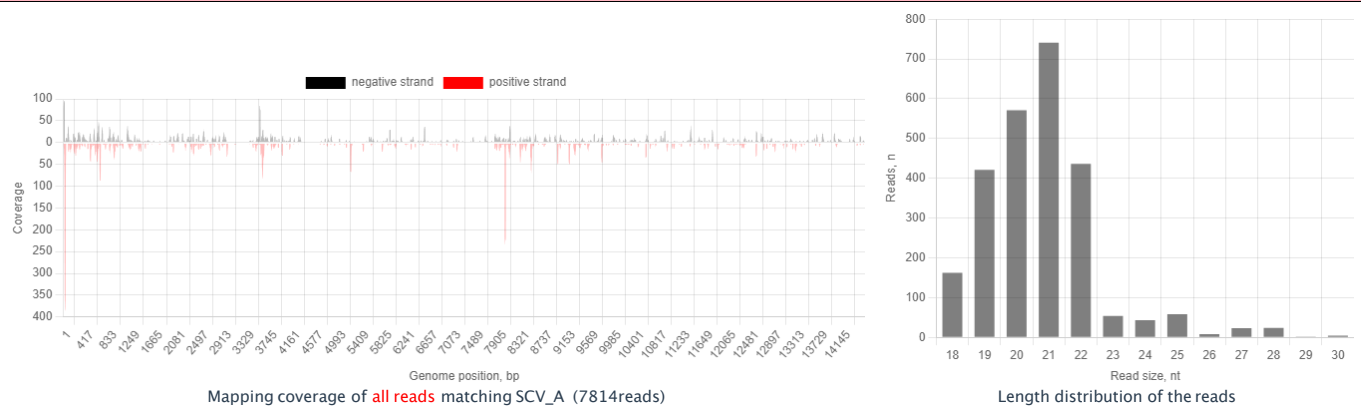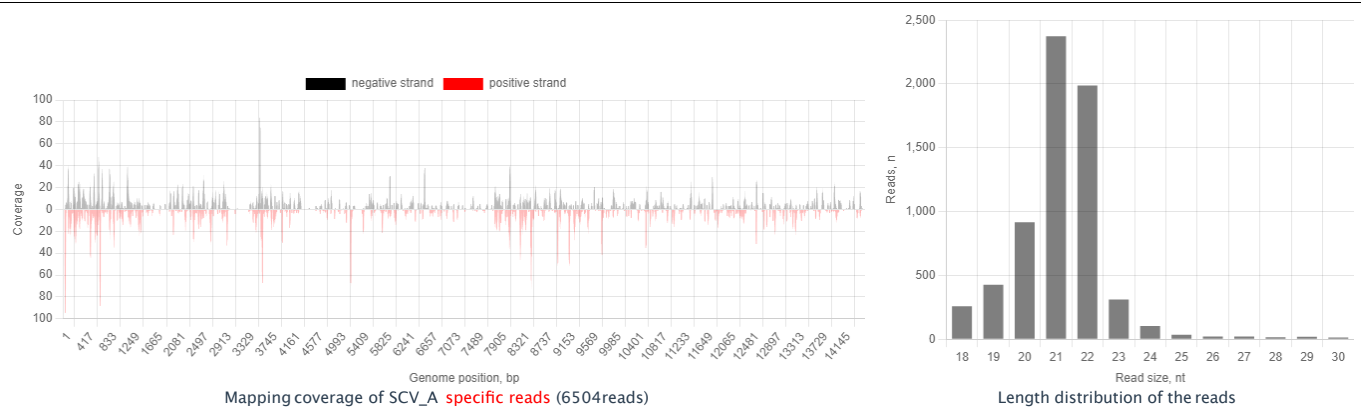

| Dataset | Input reads | Virus | Reference | Mapped reads | Mapped reads, % | RPKM | Forward/Reverse balance | Nonredundant, % | Strain specific | Strain specific, % from total mapped reads | Strain specific, RPKM |
|---------|-------------|-------|-----------|--------------|-----------------|------|-------------------------|-----------------|-----------------|--------------------------------------------|-----------------------|
| 1B_3    | 10000000    | SCV   | SCV_B     | 1365         | 0.014           | 9.4  | 0.7                     | 25.9            | 6824            | 499.9                                      | 7.3                   |

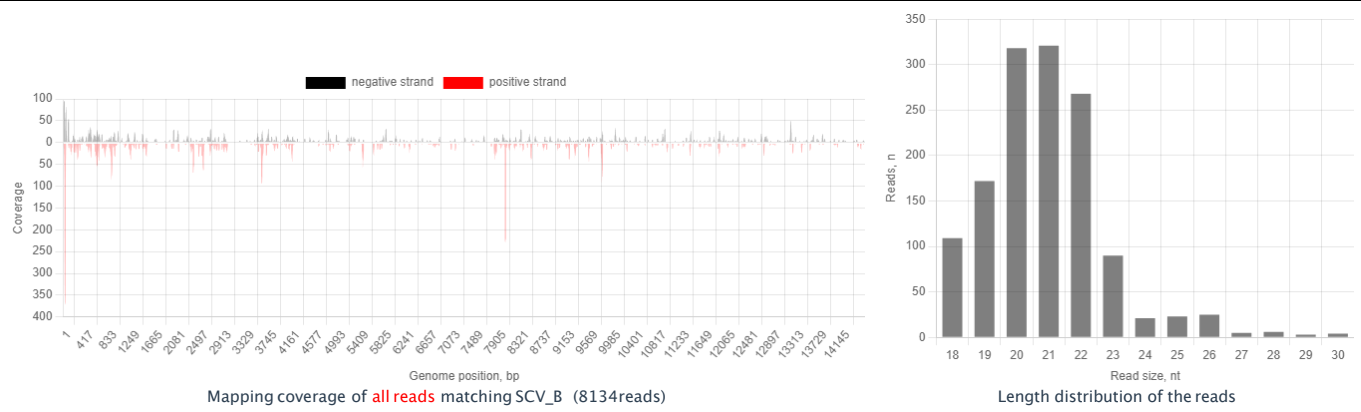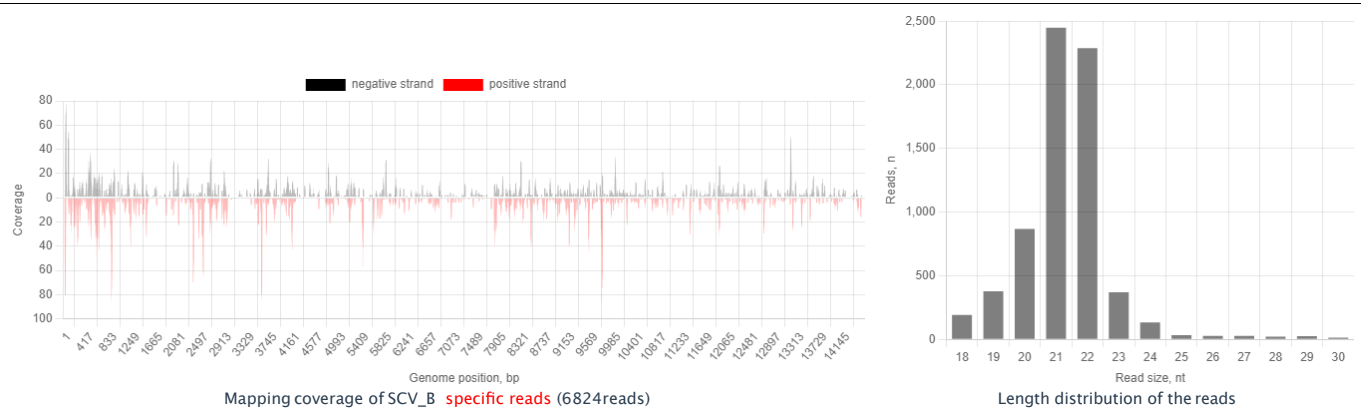

| Dataset | Input reads | Virus | Reference  | Mapped reads | Mapped reads, % | RPKM  | Forward/Reverse balance | Nonredundant, % | Strain specific | Strain specific, % from total mapped reads | Strain specific, RPKM |
|---------|-------------|-------|------------|--------------|-----------------|-------|-------------------------|-----------------|-----------------|--------------------------------------------|-----------------------|
| 1B_3    | 10000000    | SMoV  | SMoV_RNA1A | 7320         | 0.073           | 104.0 | 2.1                     | 19.1            | 5469            | 74.7                                       | 46.5                  |

| Dataset | Input reads | Virus | Reference | Mapped reads | Mapped reads, % | RPKM | Forward/Reverse balance | Nonredundant, % | Strain specific | Strain specific, % from total mapped reads | Strain specific, RPKM |
|---------|-------------|-------|-----------|--------------|-----------------|------|-------------------------|-----------------|-----------------|--------------------------------------------|-----------------------|
|---------|-------------|-------|-----------|--------------|-----------------|------|-------------------------|-----------------|-----------------|--------------------------------------------|-----------------------|

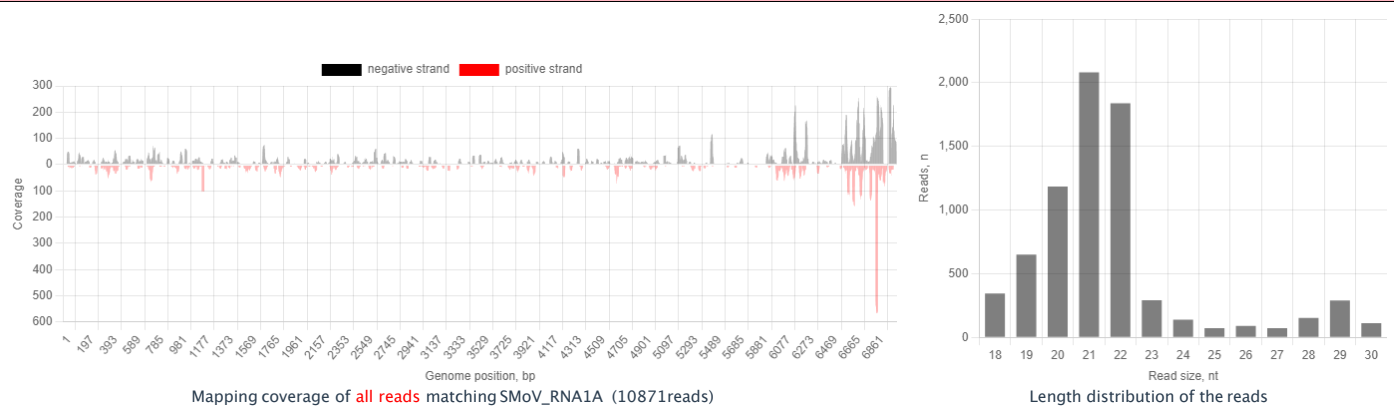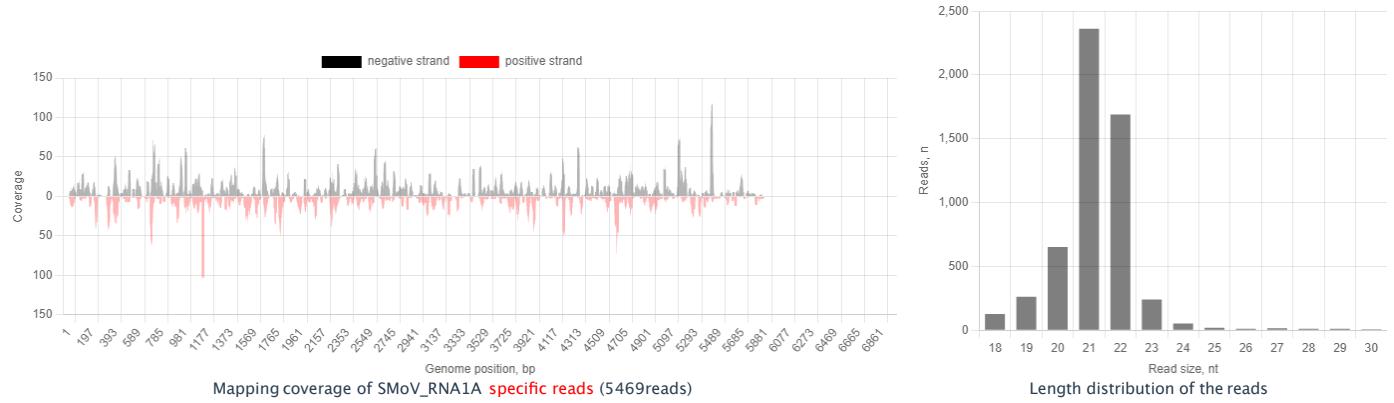

| Dataset | Input reads | Virus | Reference  | Mapped reads | Mapped reads, % | RPKM | Forward/Reverse balance | Nonredundant, % | Strain specific | Strain specific, % from total mapped reads | Strain specific, RPKM |
|---------|-------------|-------|------------|--------------|-----------------|------|-------------------------|-----------------|-----------------|--------------------------------------------|-----------------------|
| 1B_3    | 10000000    | SMoV  | SMoV_RNA1B | 6864         | 0.069           | 97.3 | 1.7                     | 19.7            | 4704            | 68.5                                       | 39.5                  |

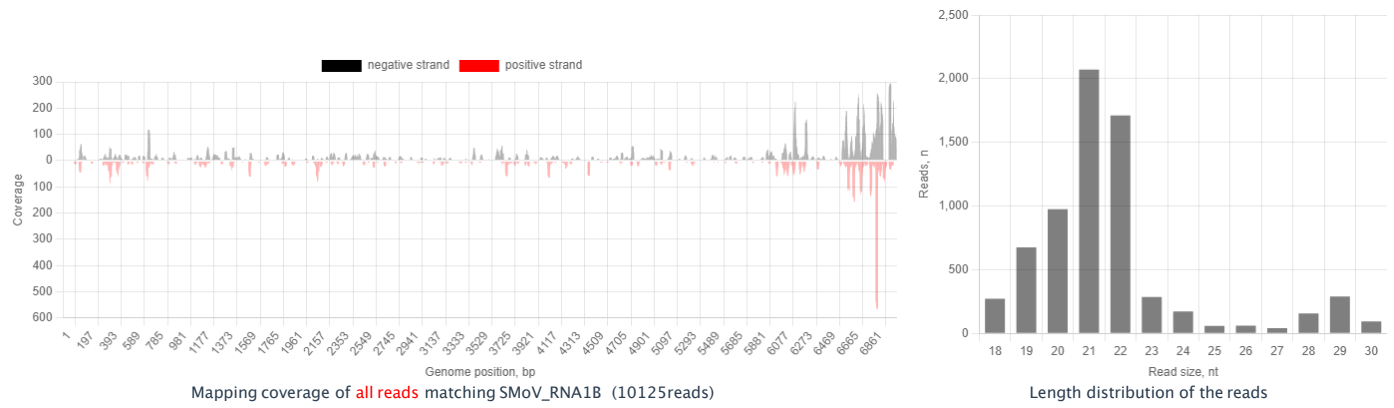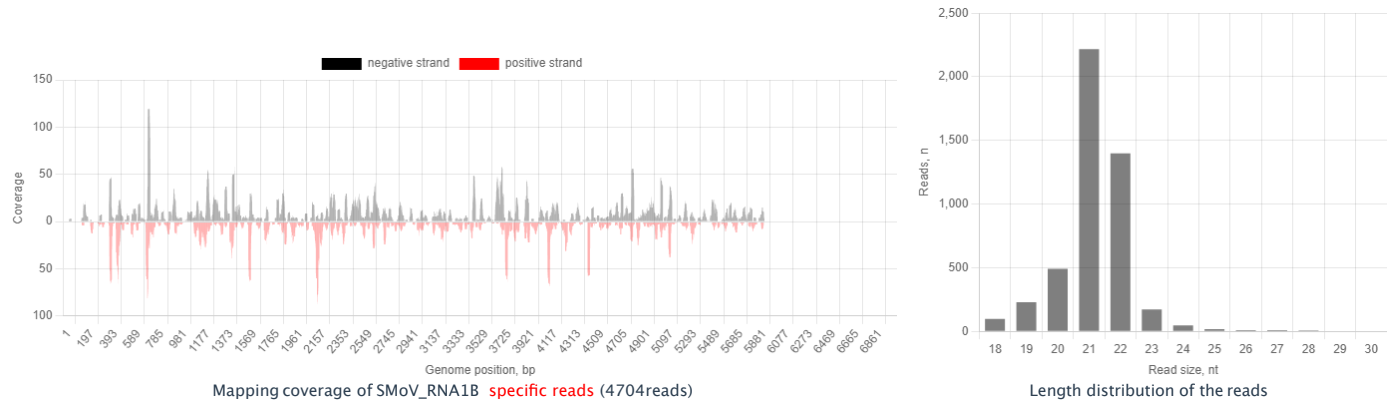

| Dataset | Input reads | Virus | Reference  | Mapped reads | Mapped reads, % | RPKM  | Forward/Reverse balance | Nonredundant, % | Strain specific | Strain specific, % from total mapped reads | Strain specific, RPKM |
|---------|-------------|-------|------------|--------------|-----------------|-------|-------------------------|-----------------|-----------------|--------------------------------------------|-----------------------|
| 1B_3    | 10000000    | SMoV  | SMoV_RNA1C | 7087         | 0.071           | 100.6 | 1.7                     | 19.1            | 5248            | 74.1                                       | 42.6                  |

| Dataset | Input reads | Virus | Reference | Mapped reads | Mapped reads, % | RPKM | Forward/Reverse balance | Nonredundant, % | Strain specific | Strain specific, % from total mapped reads | Strain specific, RPKM |
|---------|-------------|-------|-----------|--------------|-----------------|------|-------------------------|-----------------|-----------------|--------------------------------------------|-----------------------|
|---------|-------------|-------|-----------|--------------|-----------------|------|-------------------------|-----------------|-----------------|--------------------------------------------|-----------------------|

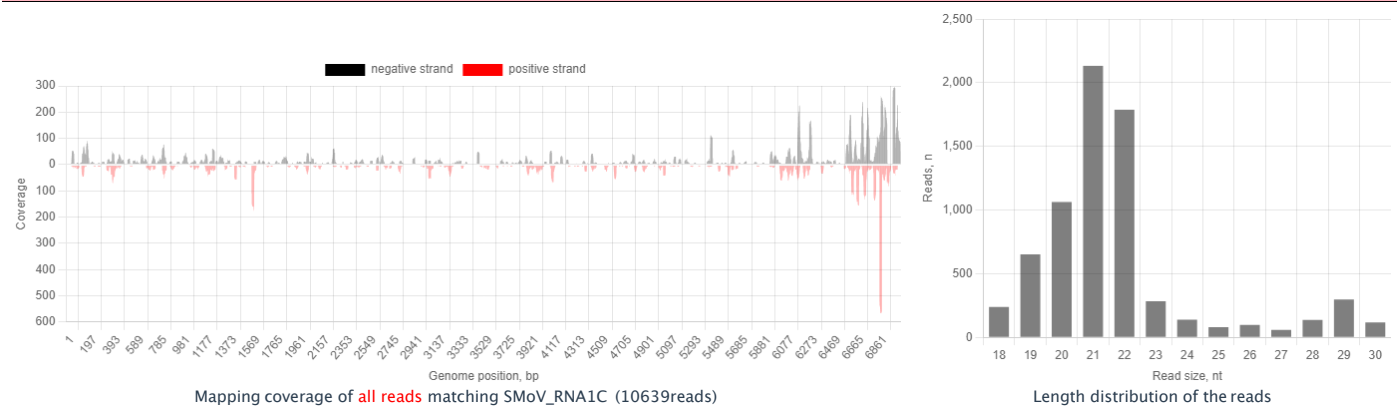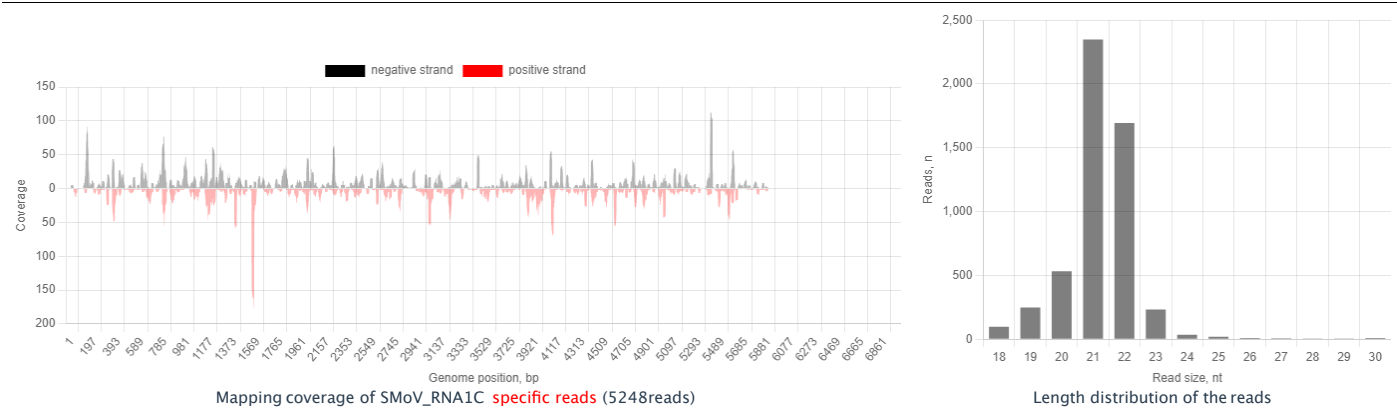

| Dataset | Input reads | Virus | Reference  | Mapped reads | Mapped reads, % | RPKM | Forward/Reverse balance | Nonredundant, % | Strain specific | Strain specific, % from total mapped reads | Strain specific, RPKM |
|---------|-------------|-------|------------|--------------|-----------------|------|-------------------------|-----------------|-----------------|--------------------------------------------|-----------------------|
| 1B_3    | 10000000    | SMoV  | SMoV_RNA2A | 5056         | 0.051           | 80.7 | 1.9                     | 21.3            | 4714            | 93.2                                       | 50.4                  |

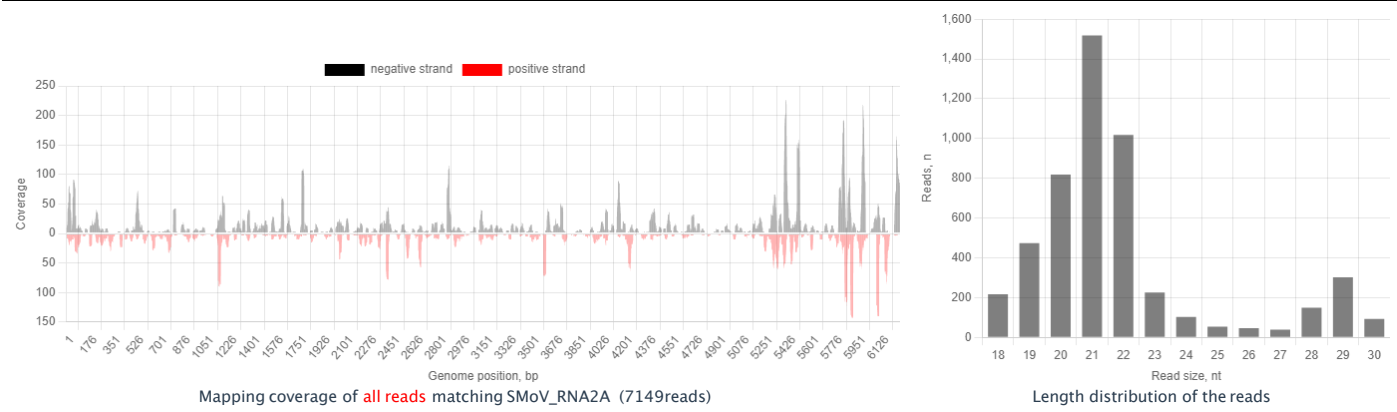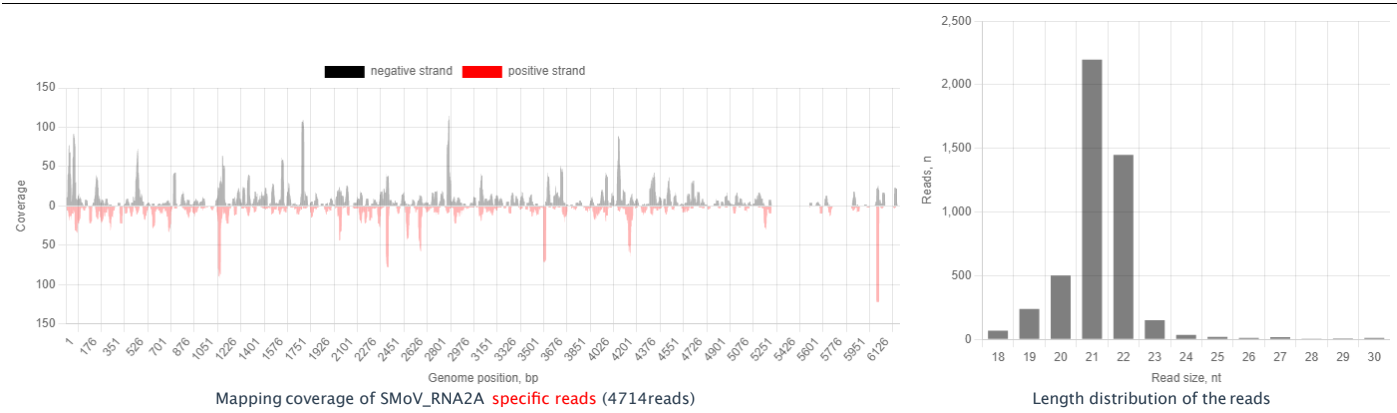

| Dataset | Input reads | Virus | Reference  | Mapped reads | Mapped reads, % | RPKM | Forward/Reverse balance | Nonredundant, % | Strain specific | Strain specific, % from total mapped reads | Strain specific, RPKM |
|---------|-------------|-------|------------|--------------|-----------------|------|-------------------------|-----------------|-----------------|--------------------------------------------|-----------------------|
| 1B_3    | 10000000    | SMoV  | SMoV_RNA2B | 4160         | 0.042           | 65.8 | 2.5                     | 20.4            | 3027            | 72.8                                       | 25.6                  |

| Dataset | Input reads | Virus | Reference | Mapped reads | Mapped reads, % | RPKM | Forward/Reverse balance | Nonredundant, % | Strain specific | Strain specific, % from total mapped reads | Strain specific, RPKM |
|---------|-------------|-------|-----------|--------------|-----------------|------|-------------------------|-----------------|-----------------|--------------------------------------------|-----------------------|
|---------|-------------|-------|-----------|--------------|-----------------|------|-------------------------|-----------------|-----------------|--------------------------------------------|-----------------------|

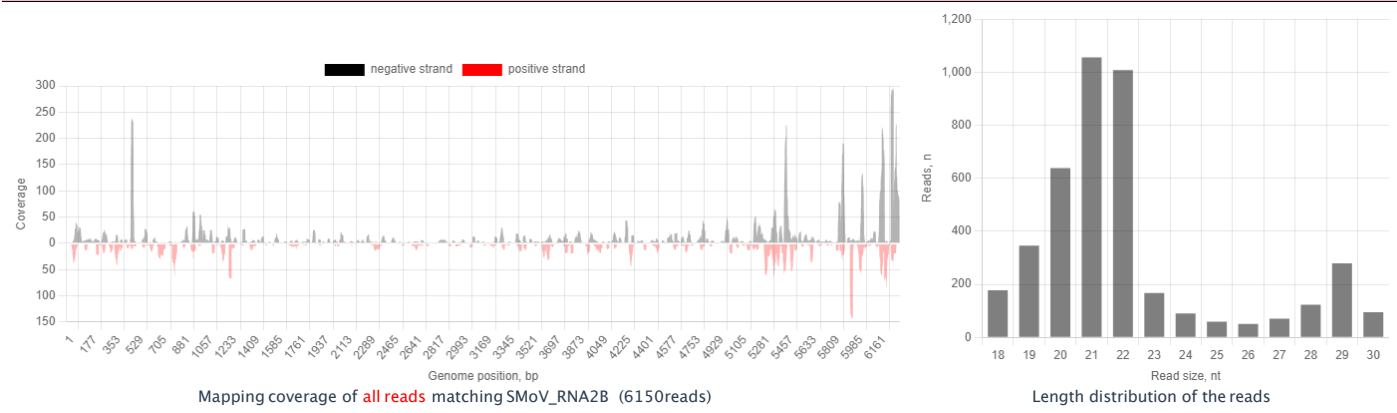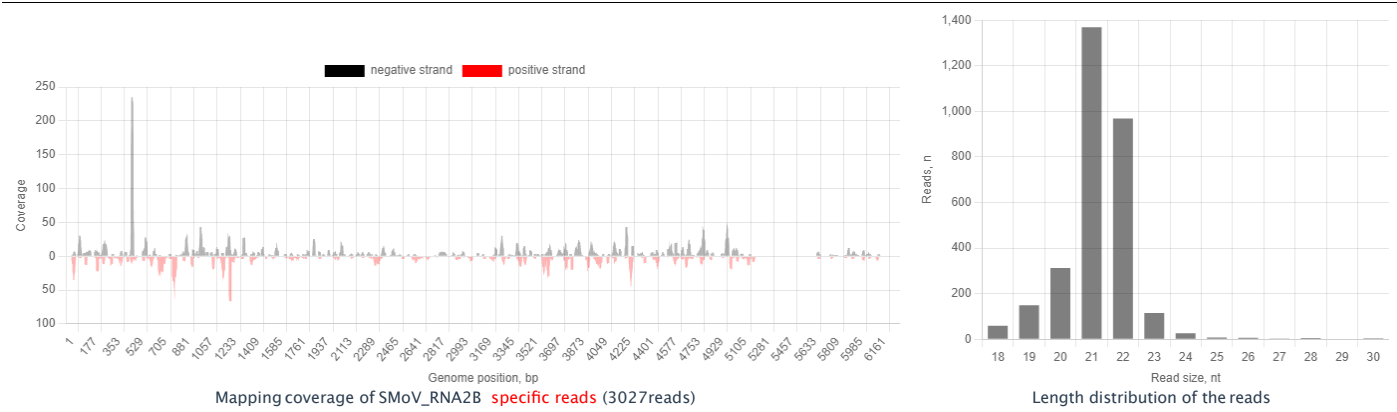

| Dataset | Input reads | Virus | Reference  | Mapped reads | Mapped reads, % | RPKM | Forward/Reverse balance | Nonredundant, % | Strain specific | Strain specific, % from total mapped reads | Strain specific, RPKM |
|---------|-------------|-------|------------|--------------|-----------------|------|-------------------------|-----------------|-----------------|--------------------------------------------|-----------------------|
| 1B_3    | 10000000    | SMoV  | SMoV_RNA2C | 5989         | 0.060           | 94.5 | 1.9                     | 18.9            | 4485            | 74.9                                       | 33.2                  |

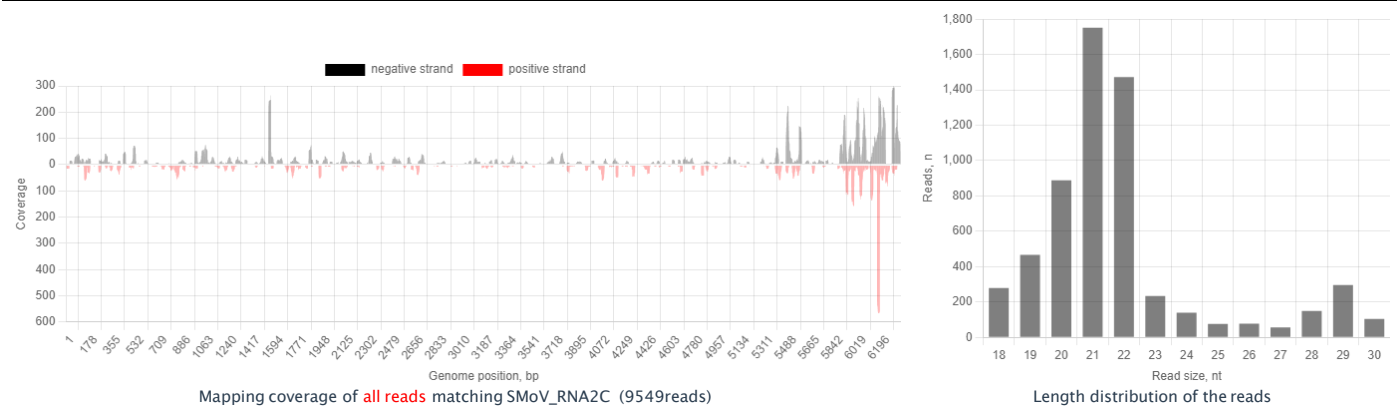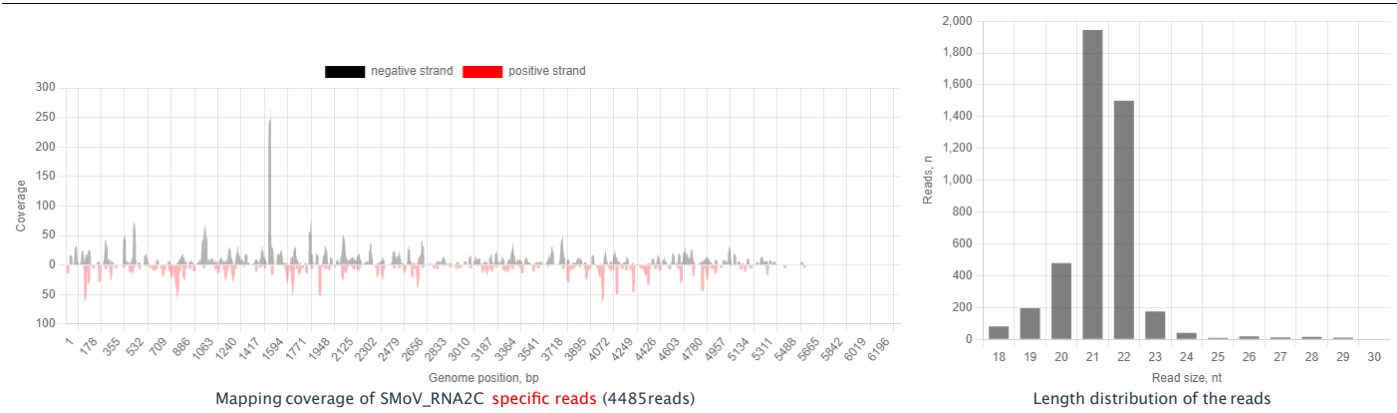

| Dataset | Input reads | Virus | Reference | Mapped reads | Mapped reads, % | RPKM | Forward/Reverse balance | Nonredundant, % | Strain specific | Strain specific, % from total mapped reads | Strain specific, RPKM |
|---------|-------------|-------|-----------|--------------|-----------------|------|-------------------------|-----------------|-----------------|--------------------------------------------|-----------------------|
| 1B_3    | 10000000    | StrV1 | StrV1_A   | 1141         | 0.011           | 8.1  | 0.8                     | 30.0            | 2267            | 198.7                                      | 6.4                   |

| Dataset | Input reads | Virus | Reference | Mapped reads | Mapped reads, % | RPKM | Forward/Reverse balance | Nonredundant, % | Strain specific | Strain specific, % from total mapped reads | Strain specific, RPKM |
|---------|-------------|-------|-----------|--------------|-----------------|------|-------------------------|-----------------|-----------------|--------------------------------------------|-----------------------|
|---------|-------------|-------|-----------|--------------|-----------------|------|-------------------------|-----------------|-----------------|--------------------------------------------|-----------------------|

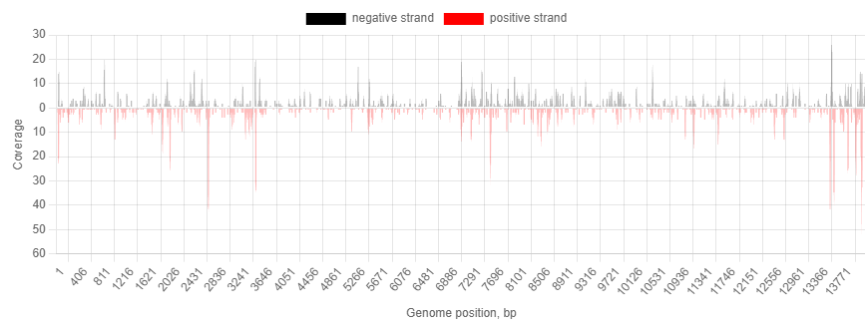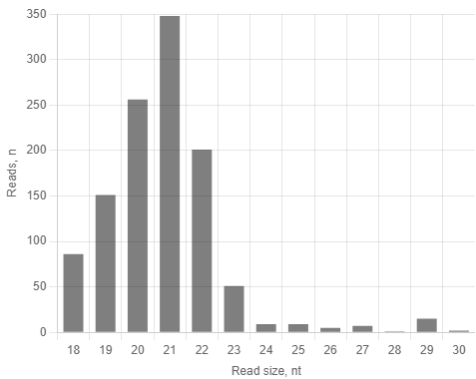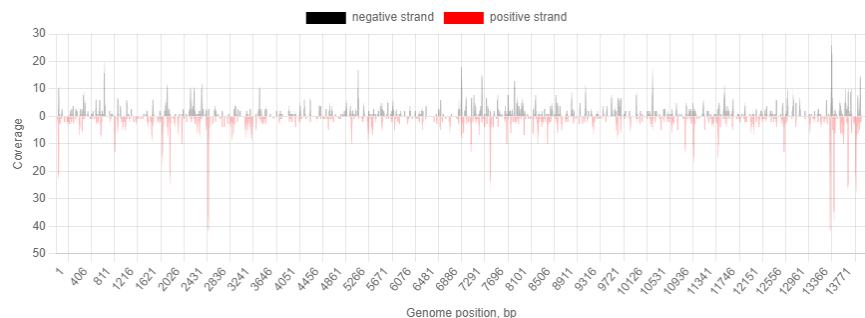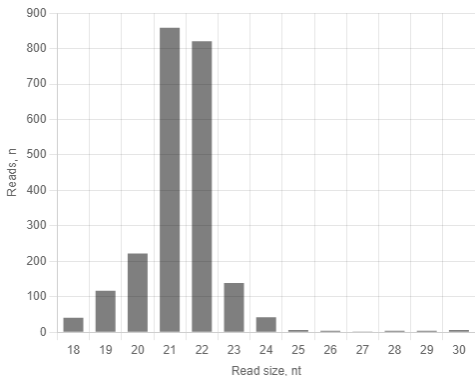

| Dataset | Input reads | Virus | Reference | Mapped reads | Mapped reads, % | RPKM | Forward/Reverse balance | Nonredundant, % | Strain specific | Strain specific, % from total mapped reads | Strain specific, RPKM |
|---------|-------------|-------|-----------|--------------|-----------------|------|-------------------------|-----------------|-----------------|--------------------------------------------|-----------------------|
| 1B_3    | 10000000    | StrV1 | StrV1_B   | 4198         | 0.042           | 29.9 | 1.4                     | 17.6            | 5741            | 136.8                                      | 29.3                  |

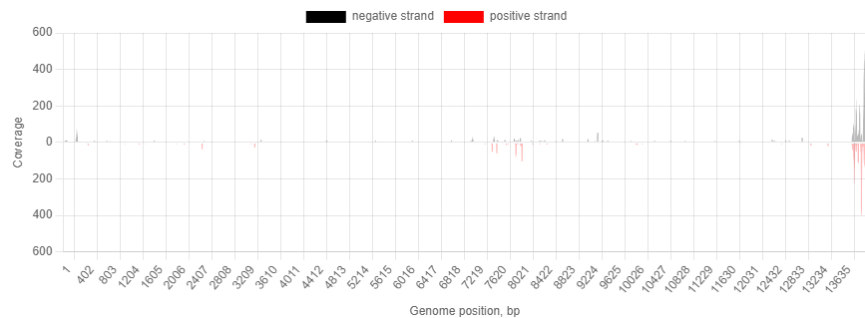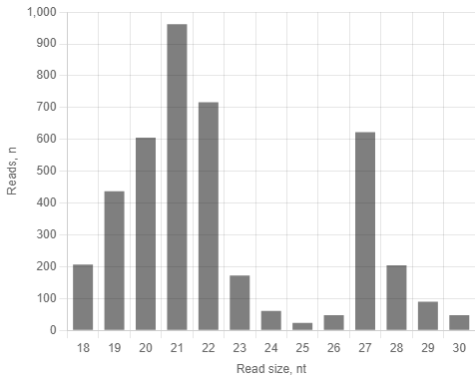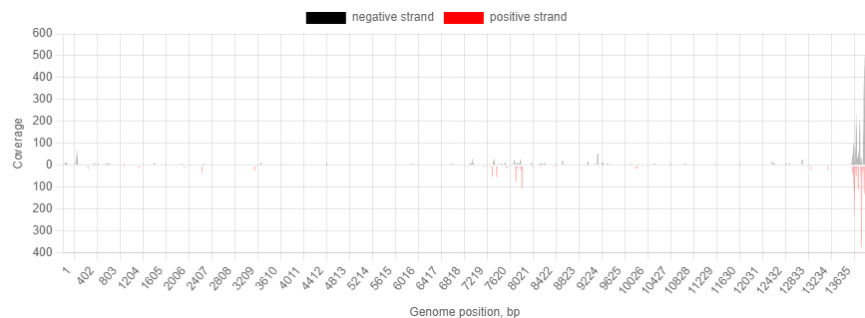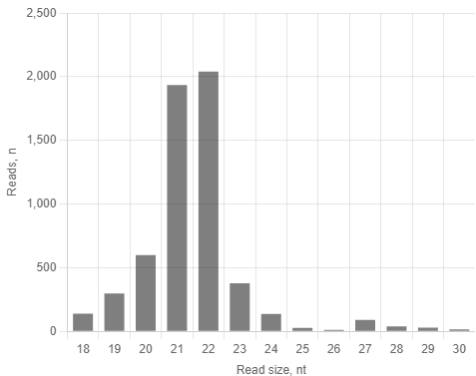

| Dataset | Input reads | Virus | Reference | Mapped reads | Mapped reads, % | RPKM | Forward/Reverse balance | Nonredundant, % | Strain specific | Strain specific, % from total mapped reads | Strain specific, RPKM |
|---------|-------------|-------|-----------|--------------|-----------------|------|-------------------------|-----------------|-----------------|--------------------------------------------|-----------------------|
| 1B_3    | 10000000    | StrV1 | StrV1_C   | 664          | 0.007           | 4.7  | 0.7                     | 29.7            | 763             | 114.9                                      | 3.0                   |



| Dataset | Input reads | Virus | Reference | Mapped reads | Mapped reads, % | RPKM | Forward/Reverse balance | Nonredundant, % | Strain specific | Strain specific, % from total mapped reads | Strain specific, RPKM |
|---------|-------------|-------|-----------|--------------|-----------------|------|-------------------------|-----------------|-----------------|--------------------------------------------|-----------------------|
|---------|-------------|-------|-----------|--------------|-----------------|------|-------------------------|-----------------|-----------------|--------------------------------------------|-----------------------|

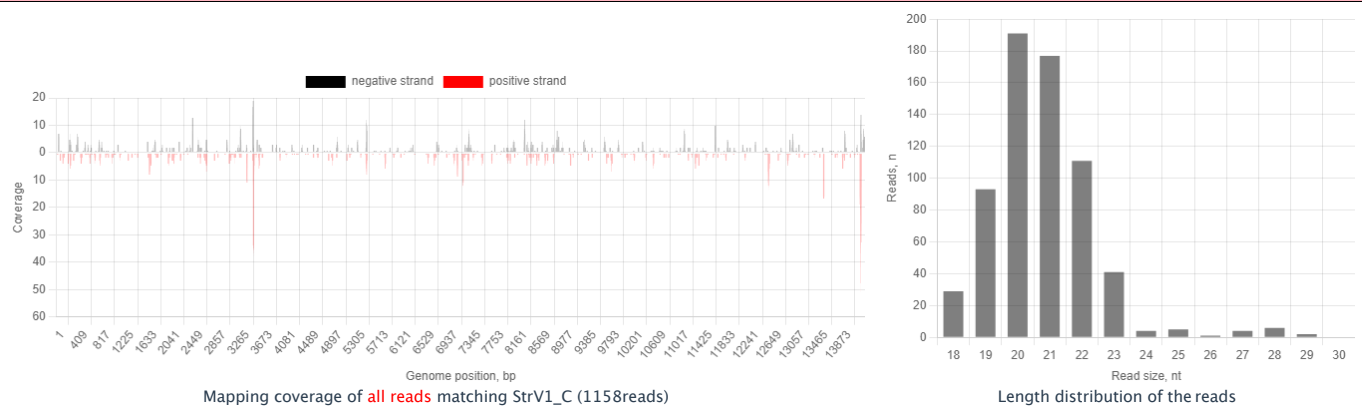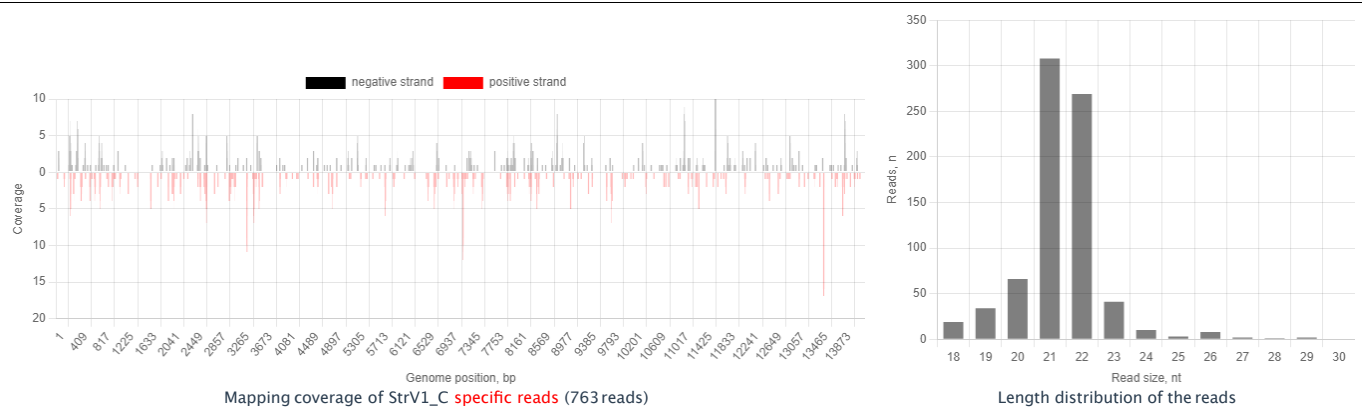

### Mappings of the 1B\_4 reads against the viral references.

| Dataset | Input reads | Virus | Reference | Mapped reads | Mapped reads, % | RPKM | Forward/Reverse balance | Nonredundant, % | Strain specific | Strain specific, % from total mapped reads | Strain specific, RPKM |
|---------|-------------|-------|-----------|--------------|-----------------|------|-------------------------|-----------------|-----------------|--------------------------------------------|-----------------------|
| 1B_4    | 10000000    | SCV   | SCV_A     | 7011         | 0.070           | 48.2 | 0.9                     | 24.0            | 6504            | 92.8                                       | 42.9                  |

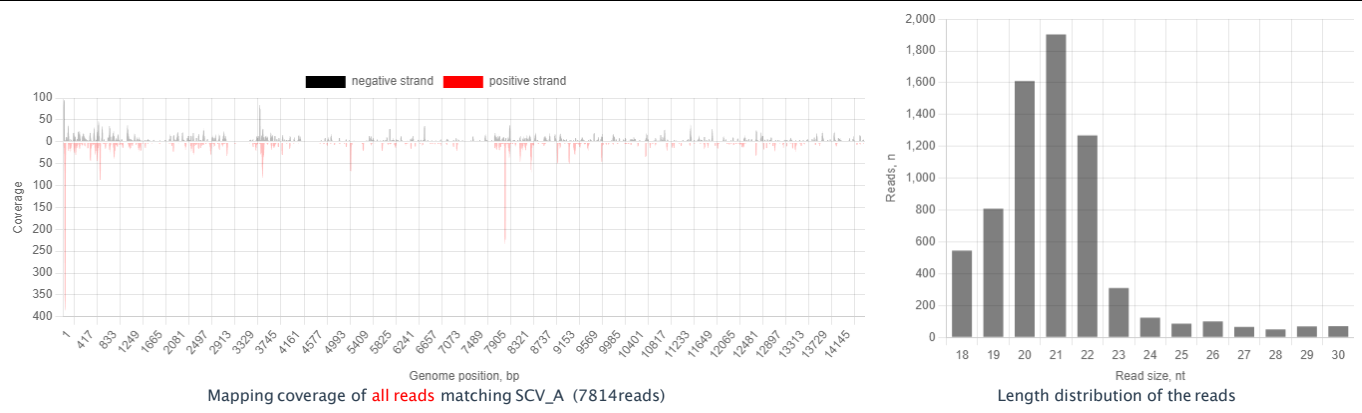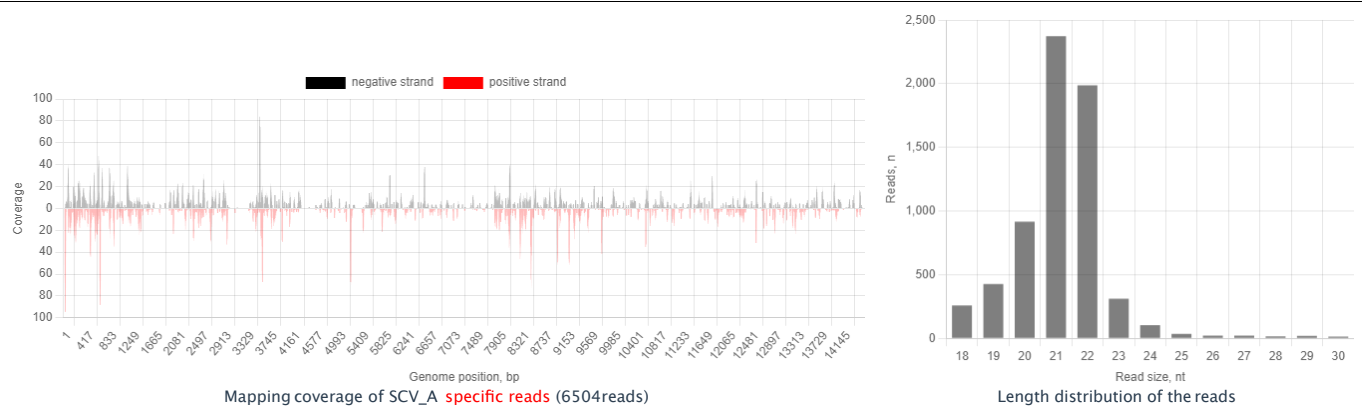

| Dataset | Input reads | Virus | Reference | Mapped reads | Mapped reads, % | RPKM | Forward/Reverse balance | Nonredundant, % | Strain specific | Strain specific, % from total mapped reads | Strain specific, RPKM |
|---------|-------------|-------|-----------|--------------|-----------------|------|-------------------------|-----------------|-----------------|--------------------------------------------|-----------------------|
| 1B_4    | 10000000    | SCV   | SCV_B     | 3462         | 0.035           | 23.8 | 0.8                     | 25.8            | 6824            | 197.1                                      | 18.5                  |

| Dataset | Input reads | Virus | Reference | Mapped reads | Mapped reads, % | RPKM | Forward/Reverse balance | Nonredundant, % | Strain specific | Strain specific, % from total mapped reads | Strain specific, RPKM |
|---------|-------------|-------|-----------|--------------|-----------------|------|-------------------------|-----------------|-----------------|--------------------------------------------|-----------------------|
|---------|-------------|-------|-----------|--------------|-----------------|------|-------------------------|-----------------|-----------------|--------------------------------------------|-----------------------|

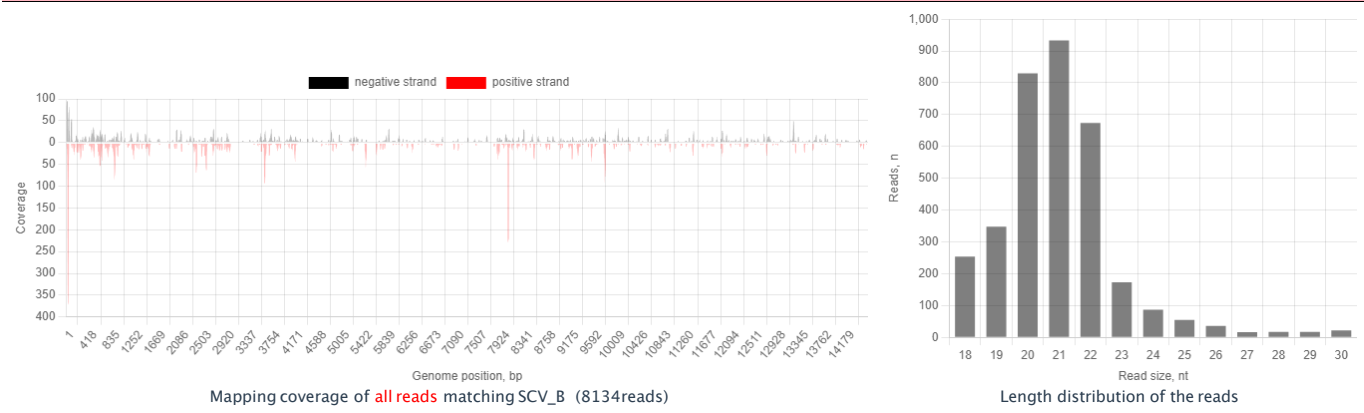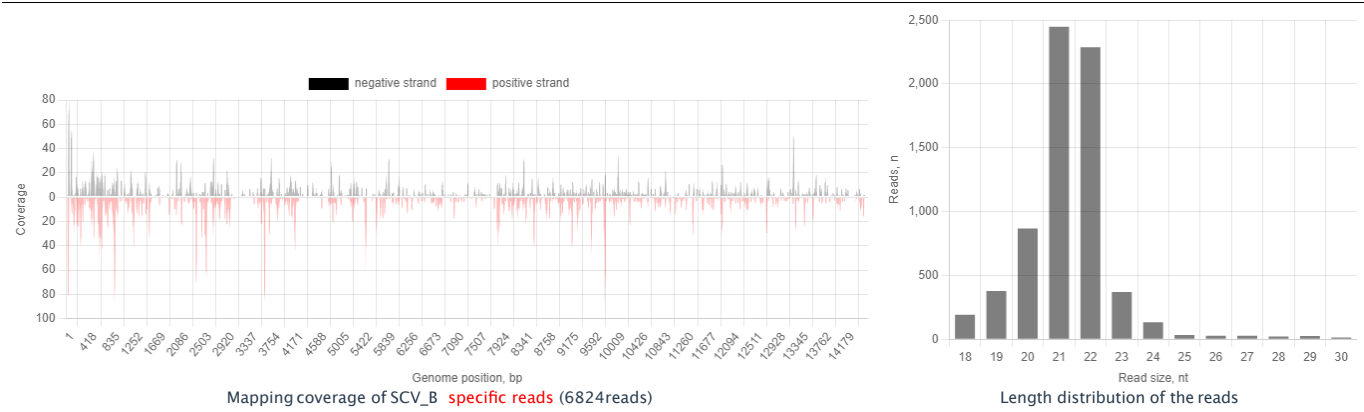

| Dataset | Input reads | Virus | Reference  | Mapped reads | Mapped reads, % | RPKM  | Forward/Reverse balance | Nonredundant, % | Strain specific | Strain specific, % from total mapped reads | Strain specific, RPKM |
|---------|-------------|-------|------------|--------------|-----------------|-------|-------------------------|-----------------|-----------------|--------------------------------------------|-----------------------|
| 1B_4    | 10000000    | SMoV  | SMoV_RNA1A | 7216         | 0.072           | 102.5 | 1.9                     | 19.3            | 5469            | 75.8                                       | 48.4                  |

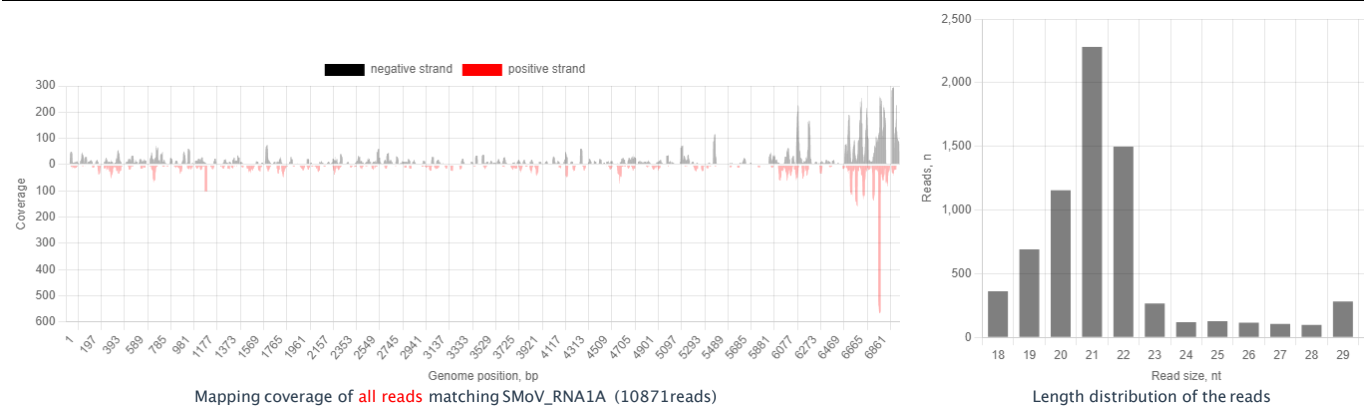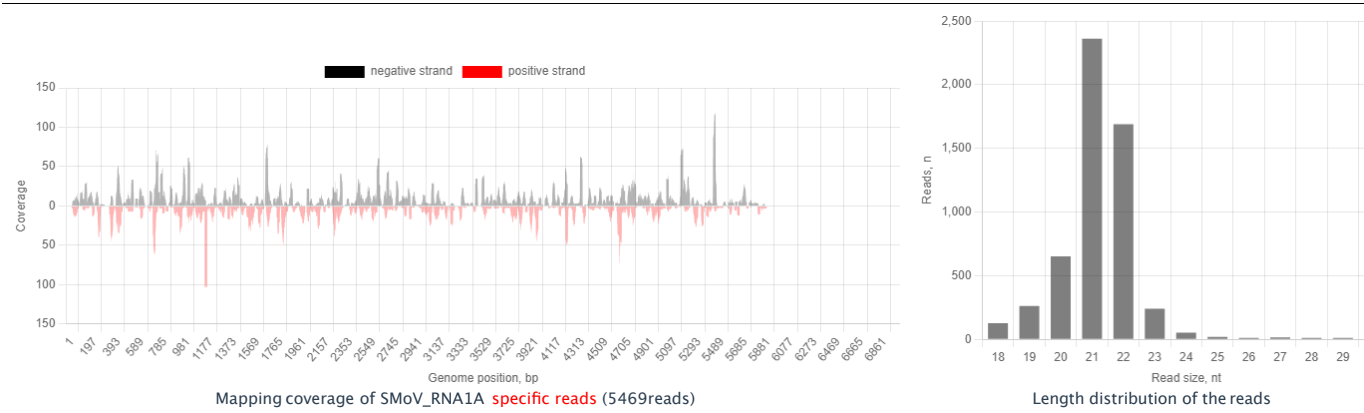

| Dataset | Input reads | Virus | Reference  | Mapped reads | Mapped reads, % | RPKM | Forward/Reverse balance | Nonredundant, % | Strain specific | Strain specific, % from total mapped reads | Strain specific, RPKM |
|---------|-------------|-------|------------|--------------|-----------------|------|-------------------------|-----------------|-----------------|--------------------------------------------|-----------------------|
| 1B_4    | 10000000    | SMoV  | SMoV_RNA1B | 6561         | 0.066           | 93.0 | 1.7                     | 19.2            | 4704            | 71.7                                       | 38.9                  |

| Dataset | Input reads | Virus | Reference | Mapped reads | Mapped reads, % | RPKM | Forward/Reverse balance | Nonredundant, % | Strain specific | Strain specific, % from total mapped reads | Strain specific, RPKM |
|---------|-------------|-------|-----------|--------------|-----------------|------|-------------------------|-----------------|-----------------|--------------------------------------------|-----------------------|
|---------|-------------|-------|-----------|--------------|-----------------|------|-------------------------|-----------------|-----------------|--------------------------------------------|-----------------------|

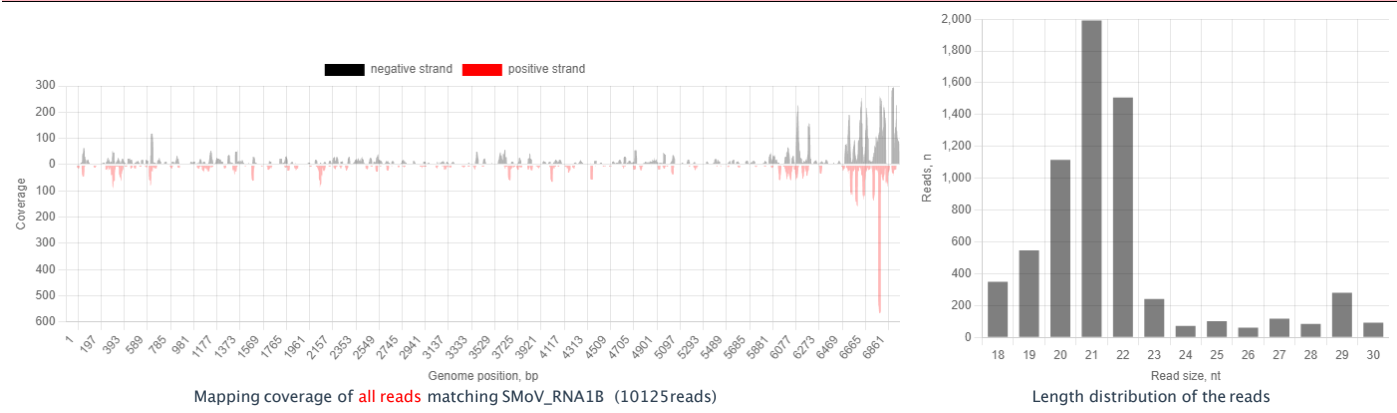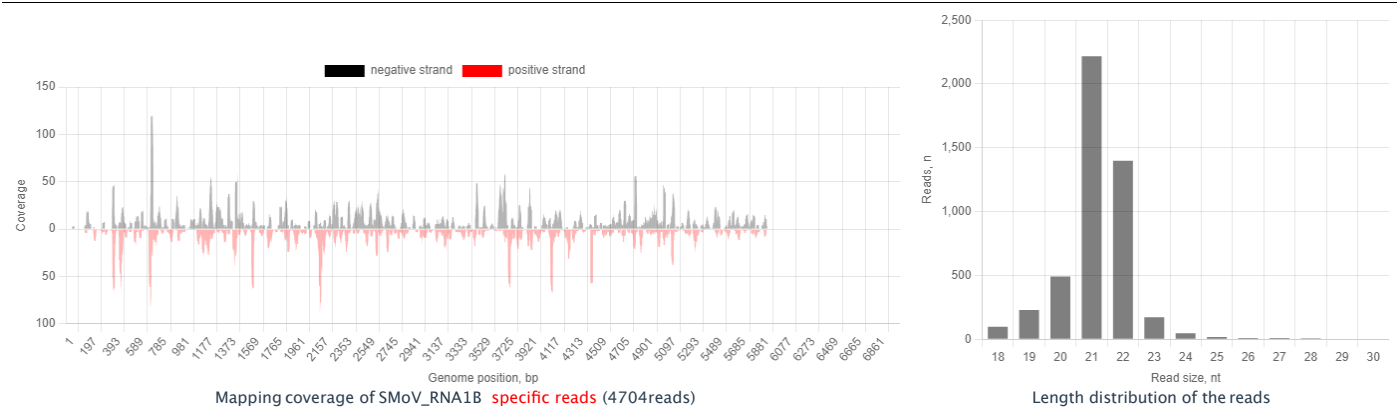

| Dataset | Input reads | Virus | Reference  | Mapped reads | Mapped reads, % | RPKM | Forward/Reverse balance | Nonredundant, % | Strain specific | Strain specific, % from total mapped reads | Strain specific, RPKM |
|---------|-------------|-------|------------|--------------|-----------------|------|-------------------------|-----------------|-----------------|--------------------------------------------|-----------------------|
| 1B_4    | 10000000    | SMoV  | SMoV_RNA1C | 6708         | 0.067           | 95.2 | 1.7                     | 19.9            | 5248            | 78.2                                       | 39.5                  |

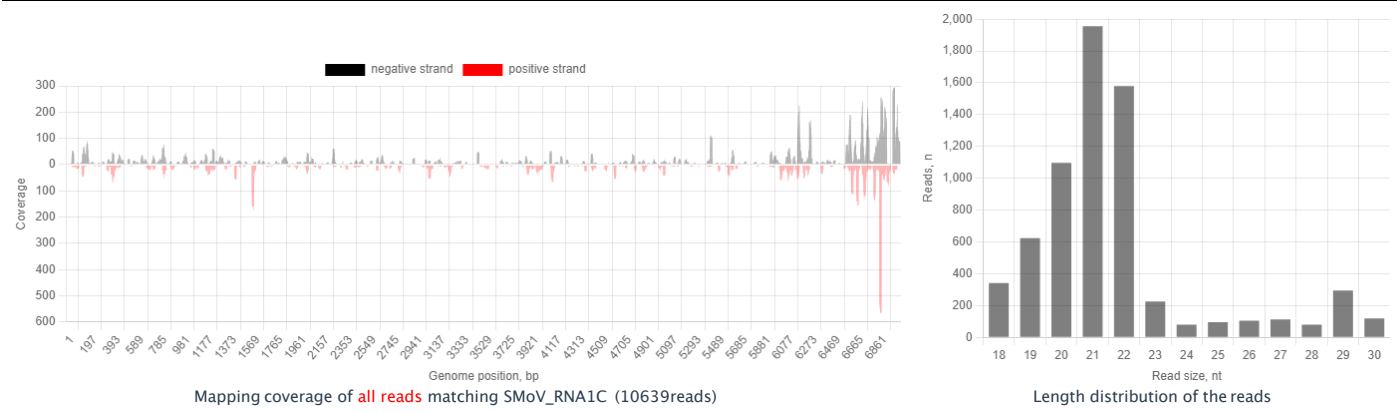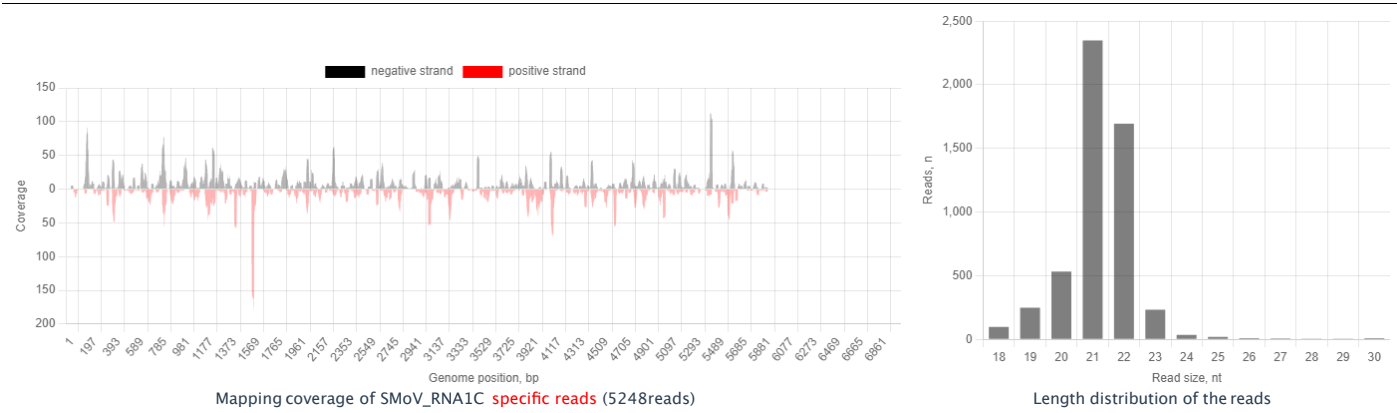

| Dataset | Input reads | Virus | Reference  | Mapped reads | Mapped reads, % | RPKM | Forward/Reverse balance | Nonredundant, % | Strain specific | Strain specific, % from total mapped reads | Strain specific, RPKM |
|---------|-------------|-------|------------|--------------|-----------------|------|-------------------------|-----------------|-----------------|--------------------------------------------|-----------------------|
| 1B_4    | 10000000    | SMoV  | SMoV_RNA2A | 4865         | 0.049           | 77.6 | 1.8                     | 19.8            | 4714            | 96.9                                       | 45.9                  |

| Dataset | Input reads | Virus | Reference | Mapped reads | Mapped reads, % | RPKM | Forward/Reverse balance | Nonredundant, % | Strain specific | Strain specific, % from total mapped reads | Strain specific, RPKM |
|---------|-------------|-------|-----------|--------------|-----------------|------|-------------------------|-----------------|-----------------|--------------------------------------------|-----------------------|
|---------|-------------|-------|-----------|--------------|-----------------|------|-------------------------|-----------------|-----------------|--------------------------------------------|-----------------------|

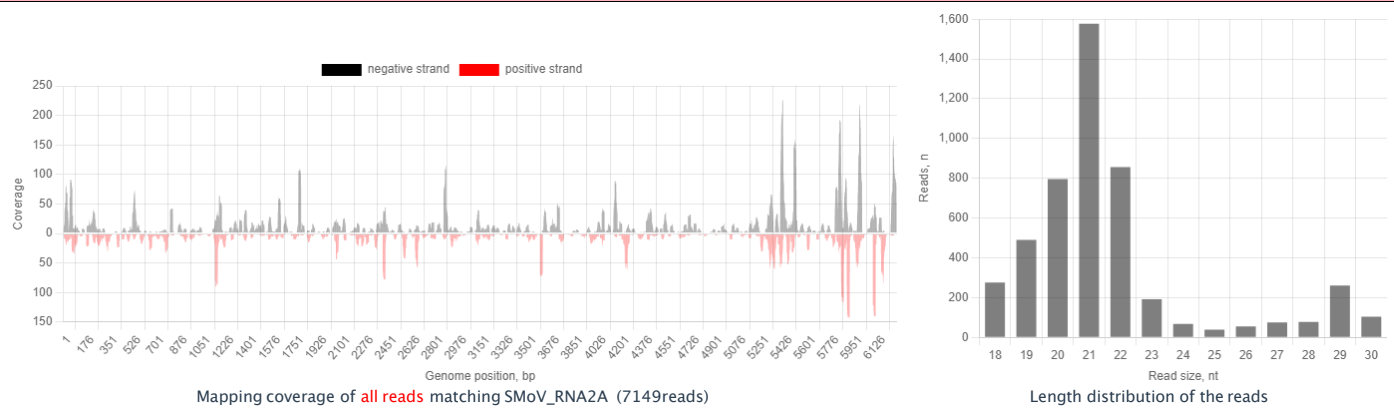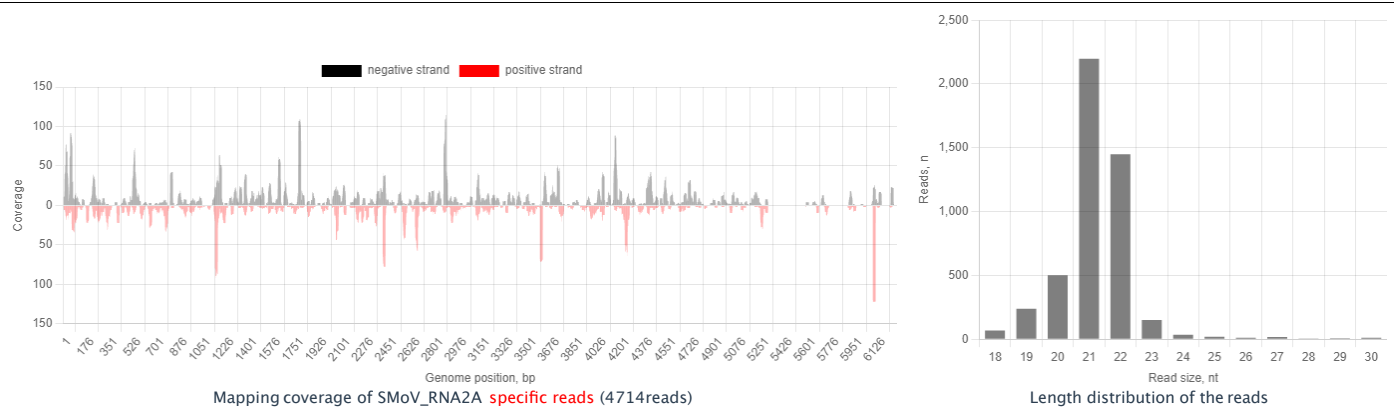

| Dataset | Input reads | Virus | Reference  | Mapped reads | Mapped reads, % | RPKM | Forward/Reverse balance | Nonredundant, % | Strain specific | Strain specific, % from total mapped reads | Strain specific, RPKM |
|---------|-------------|-------|------------|--------------|-----------------|------|-------------------------|-----------------|-----------------|--------------------------------------------|-----------------------|
| 1B_4    | 10000000    | SMoV  | SMoV_RNA2B | 4184         | 0.042           | 66.1 | 2.1                     | 21.3            | 3027            | 72.3                                       | 29.6                  |

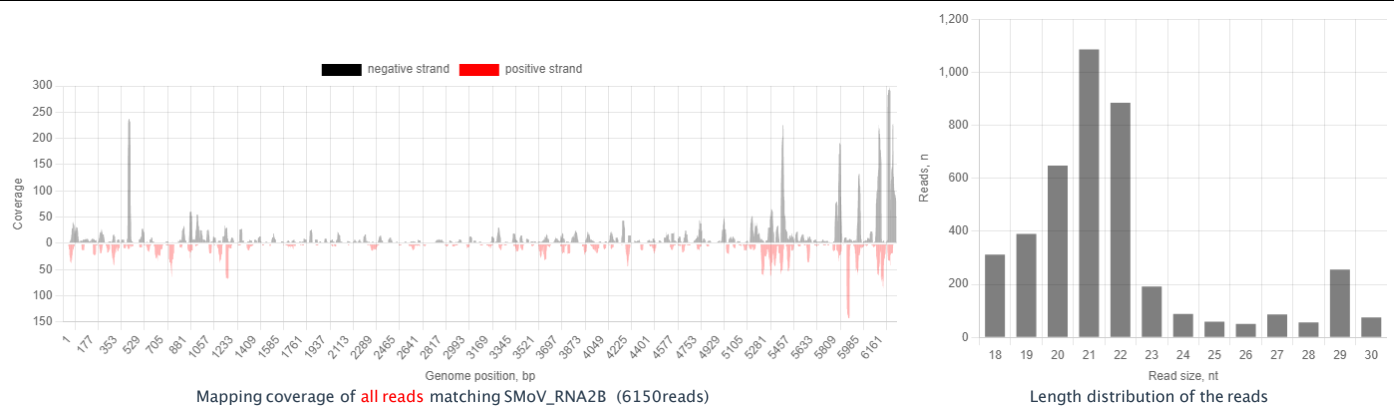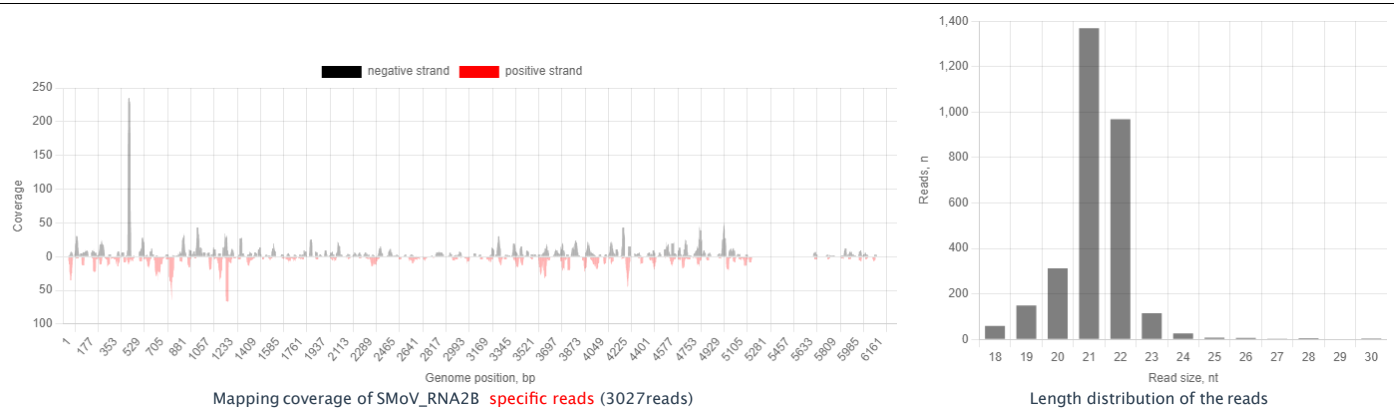

| Dataset | Input reads | Virus | Reference  | Mapped reads | Mapped reads, % | RPKM | Forward/Reverse balance | Nonredundant, % | Strain specific | Strain specific, % from total mapped reads | Strain specific, RPKM |
|---------|-------------|-------|------------|--------------|-----------------|------|-------------------------|-----------------|-----------------|--------------------------------------------|-----------------------|
| 1B_4    | 10000000    | SMoV  | SMoV_RNA2C | 6262         | 0.063           | 98.8 | 1.7                     | 18.4            | 4485            | 71.6                                       | 40.4                  |

| Dataset | Input reads | Virus | Reference | Mapped reads | Mapped reads, % | RPKM | Forward/Reverse balance | Nonredundant, % | Strain specific | Strain specific, % from total mapped reads | Strain specific, RPKM |
|---------|-------------|-------|-----------|--------------|-----------------|------|-------------------------|-----------------|-----------------|--------------------------------------------|-----------------------|
|---------|-------------|-------|-----------|--------------|-----------------|------|-------------------------|-----------------|-----------------|--------------------------------------------|-----------------------|

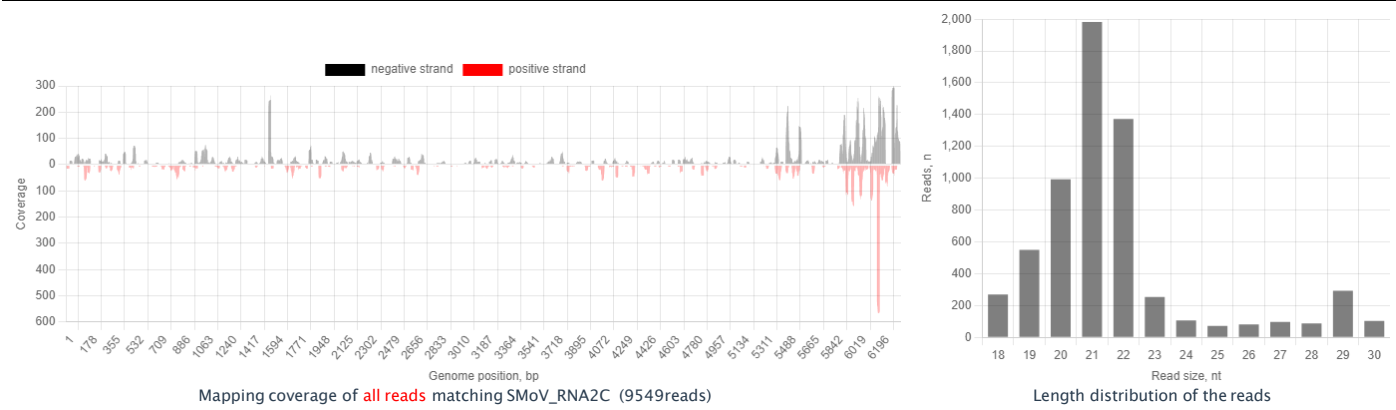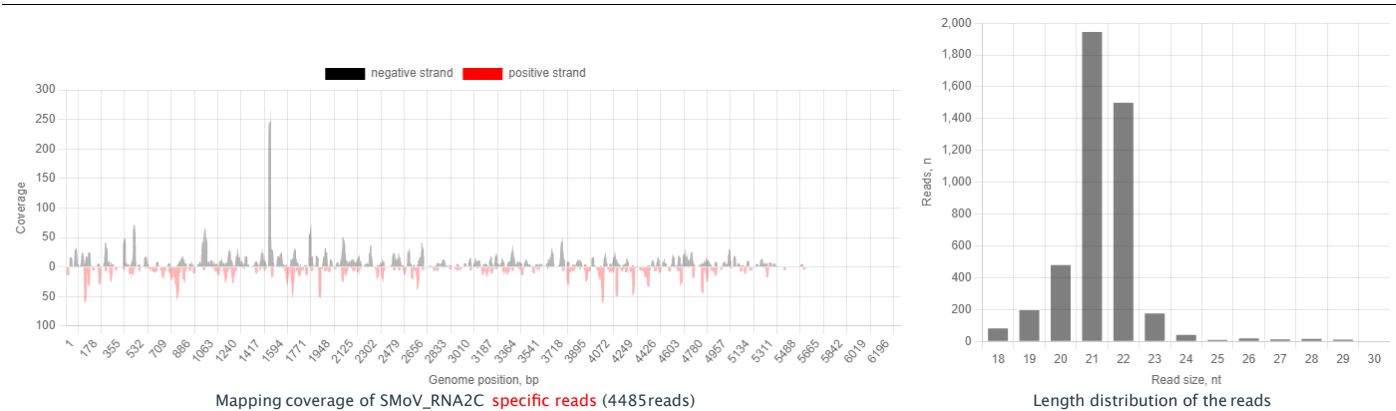

| Dataset | Input reads | Virus | Reference | Mapped reads | Mapped reads, % | RPKM | Forward/Reverse balance | Nonredundant, % | Strain specific | Strain specific, % from total mapped reads | Strain specific, RPKM |
|---------|-------------|-------|-----------|--------------|-----------------|------|-------------------------|-----------------|-----------------|--------------------------------------------|-----------------------|
| 1B_4    | 10000000    | StrV1 | StrV1_A   | 1376         | 0.014           | 9.7  | 0.9                     | 25.2            | 2267            | 164.8                                      | 7.7                   |

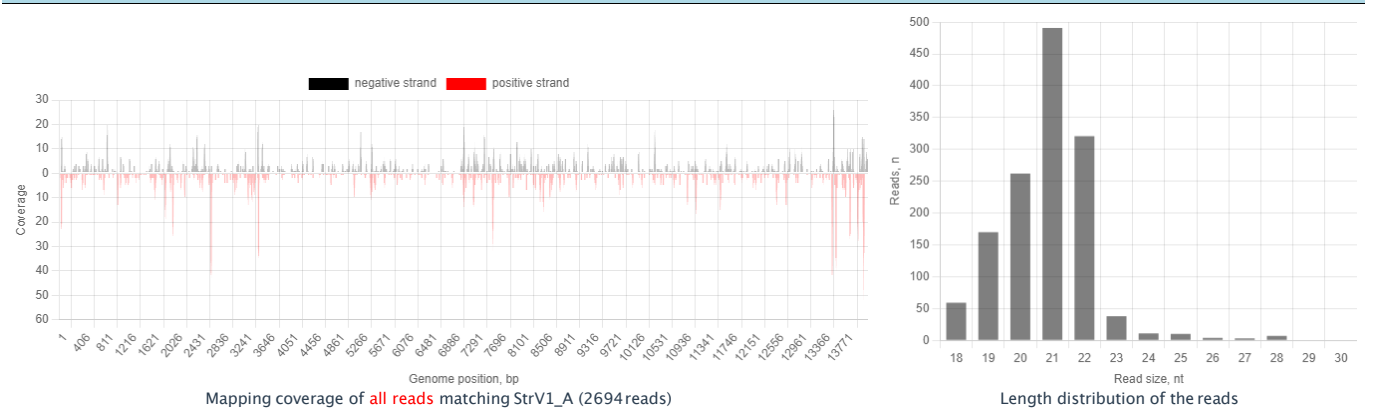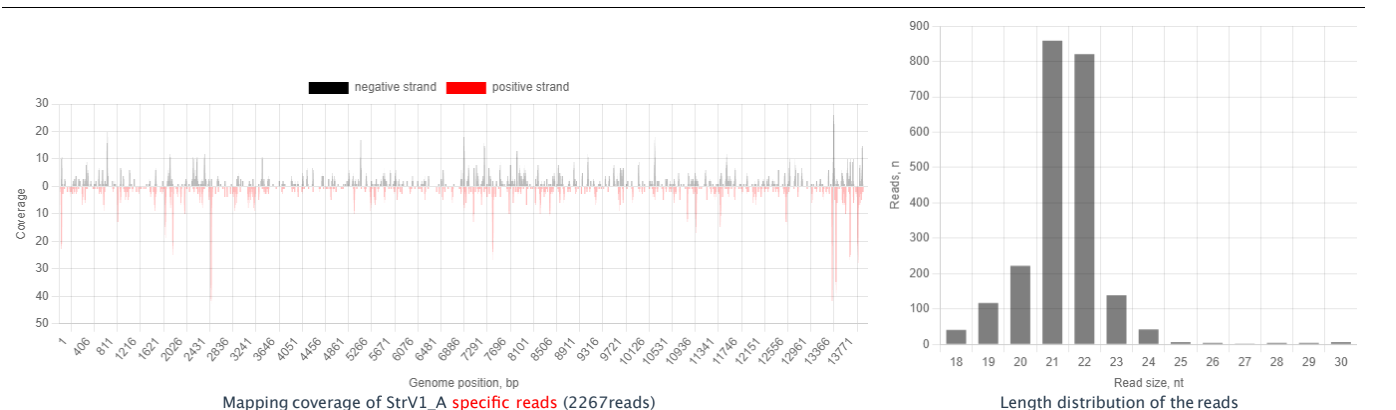

| Dataset | Input reads | Virus | Reference | Mapped reads | Mapped reads, % | RPKM | Forward/Reverse balance | Nonredundant, % | Strain specific | Strain specific, % from total mapped reads | Strain specific, RPKM |
|---------|-------------|-------|-----------|--------------|-----------------|------|-------------------------|-----------------|-----------------|--------------------------------------------|-----------------------|
| 1B_4    | 10000000    | StrV1 | StrV1_B   | 3560         | 0.036           | 25.4 | 1.5                     | 21.1            | 5741            | 161.3                                      | 24.7                  |

| Dataset | Input reads | Virus | Reference | Mapped reads | Mapped reads, % | RPKM | Forward/Reverse balance | Nonredundant, % | Strain specific | Strain specific, % from total mapped reads | Strain specific, RPKM |
|---------|-------------|-------|-----------|--------------|-----------------|------|-------------------------|-----------------|-----------------|--------------------------------------------|-----------------------|
|---------|-------------|-------|-----------|--------------|-----------------|------|-------------------------|-----------------|-----------------|--------------------------------------------|-----------------------|

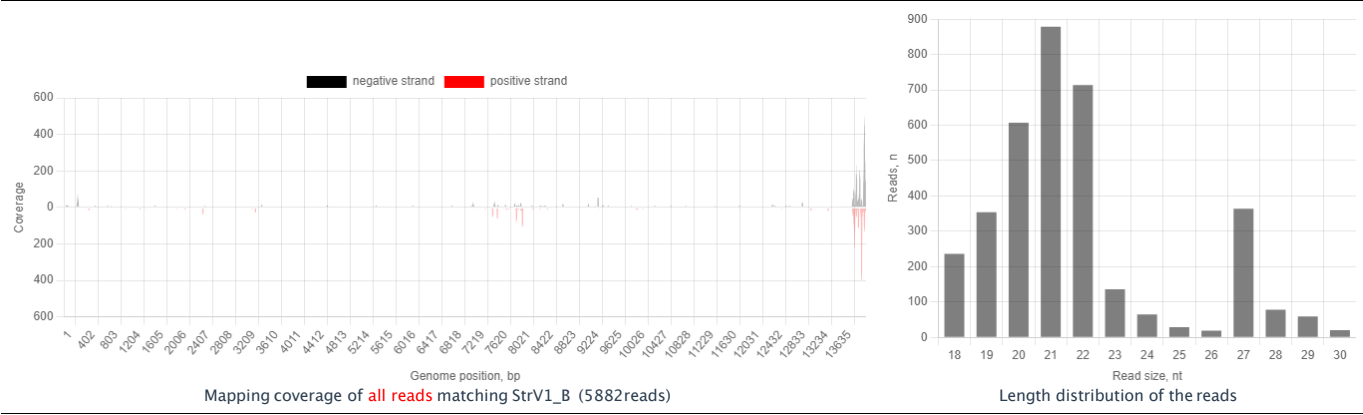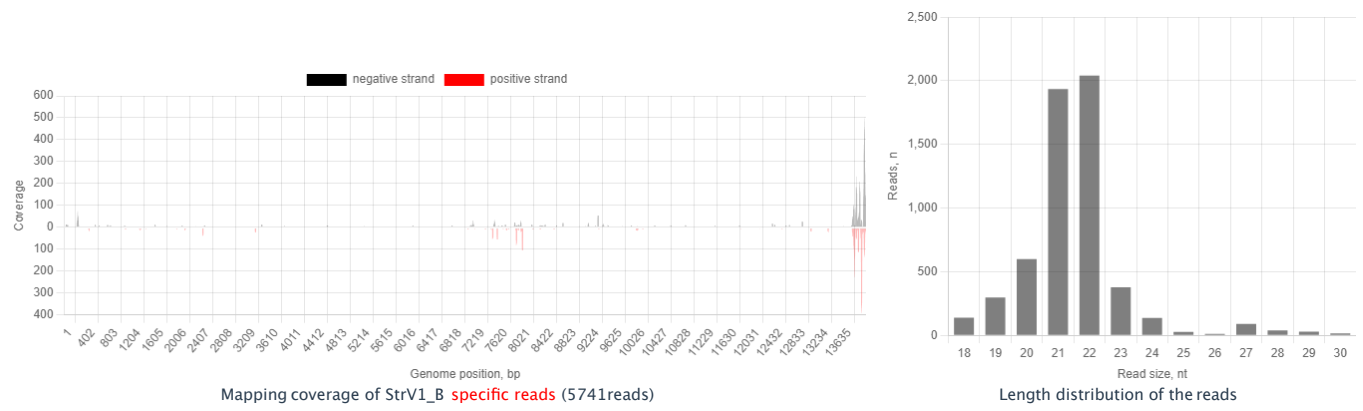

| Dataset | Input reads | Virus | Reference | Mapped reads | Mapped reads, % | RPKM | Forward/Reverse balance | Nonredundant, % | Strain specific | Strain specific, % from total mapped reads | Strain specific, RPKM |
|---------|-------------|-------|-----------|--------------|-----------------|------|-------------------------|-----------------|-----------------|--------------------------------------------|-----------------------|
| 1B_4    | 10000000    | StrV1 | StrV1_C   | 1107         | 0.011           | 7.8  | 1.0                     | 26.6            | 763             | 68.9                                       | 5.8                   |

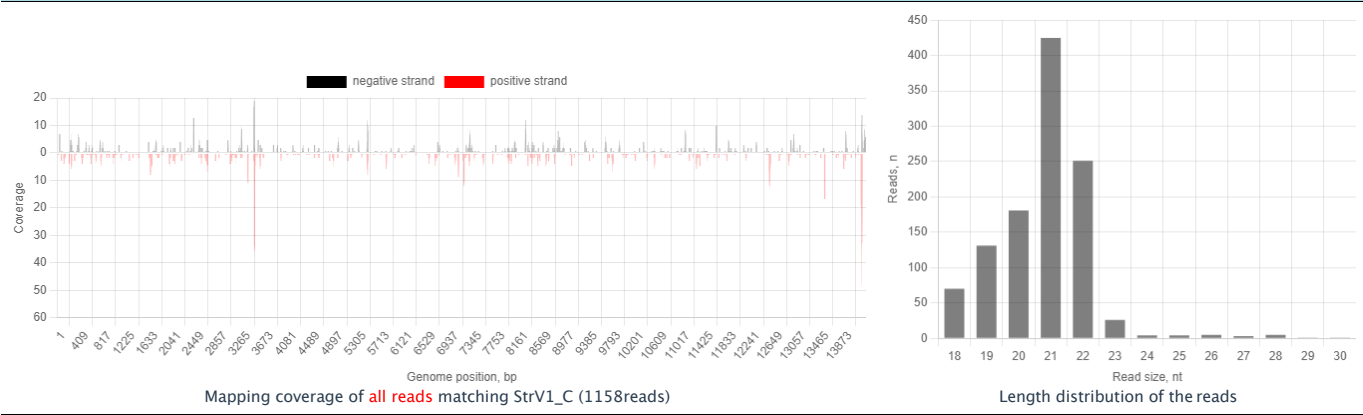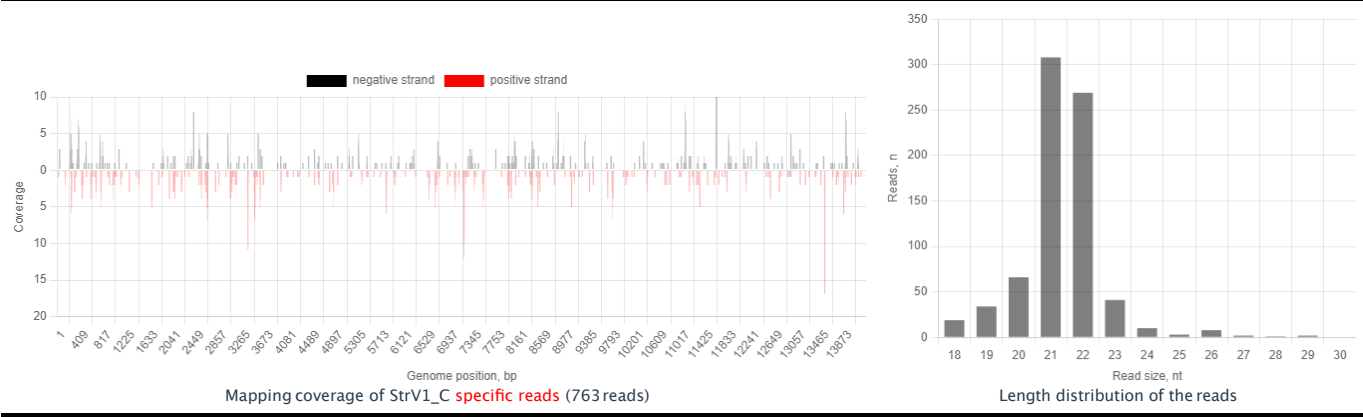

Mappings of the 2A\_2 reads against the viral references.

| Dataset | Input reads | Virus | Reference | Mapped reads | Mapped reads, % | RPKM | Forward/Reverse balance | Nonredundant, % | Strain specific | Strain specific, % from total mapped reads | Strain specific, RPKM |
|---------|-------------|-------|-----------|--------------|-----------------|------|-------------------------|-----------------|-----------------|--------------------------------------------|-----------------------|
| 2A_2    | 10000000    | SCV   | SCV_A     | 13189        | 0.132           | 90.7 | 0.8                     | 38.4            | 11245           | 85.3                                       | 77.3                  |

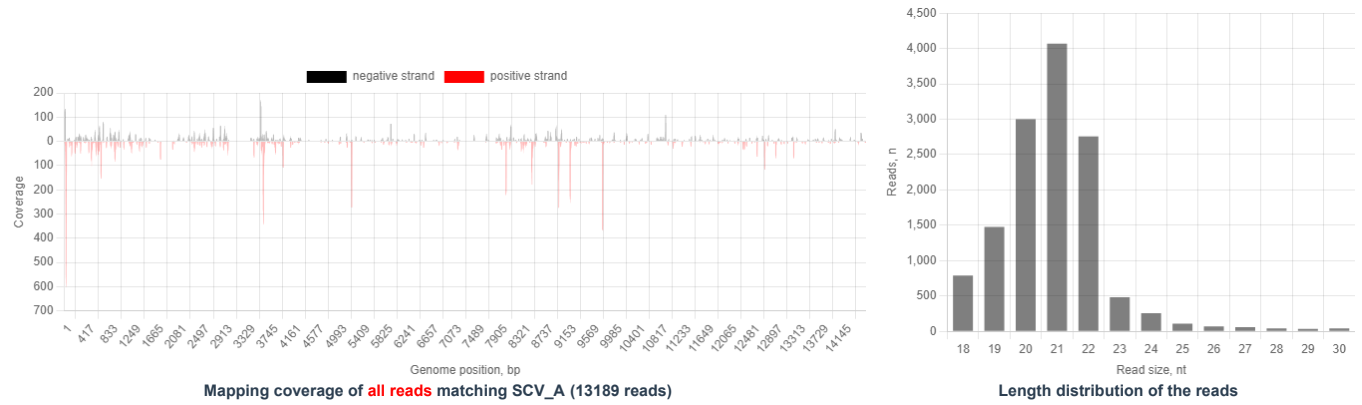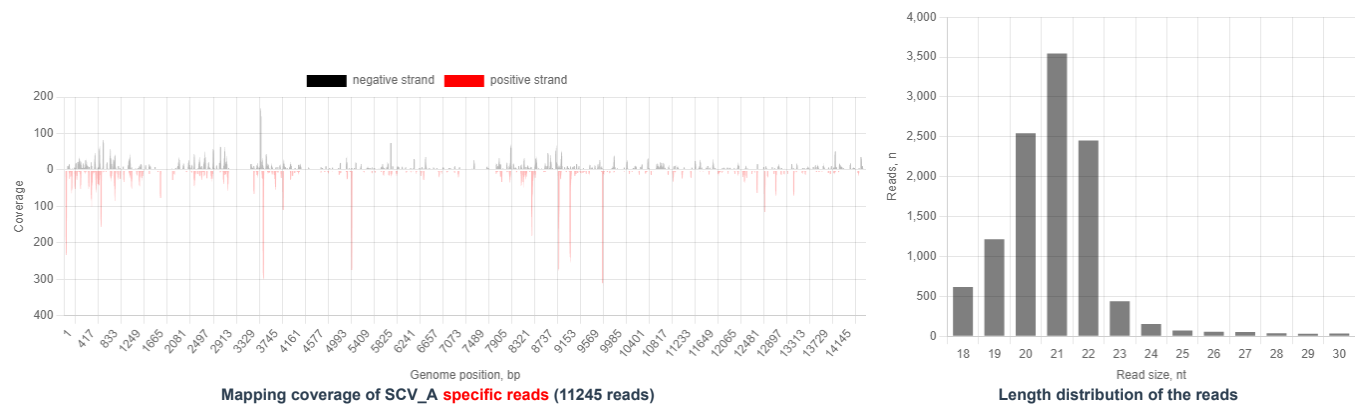

| Dataset | Input reads | Virus | Reference | Mapped reads | Mapped reads, % | RPKM | Forward/Reverse balance | Nonredundant, % | Strain specific | Strain specific, % from total mapped reads | Strain specific, RPKM |
|---------|-------------|-------|-----------|--------------|-----------------|------|-------------------------|-----------------|-----------------|--------------------------------------------|-----------------------|
| 2A_2    | 10000000    | SCV   | SCV_B     | 10814        | 0.108           | 74.3 | 0.8                     | 43.3            | 8870            | 82.0                                       | 60.9                  |

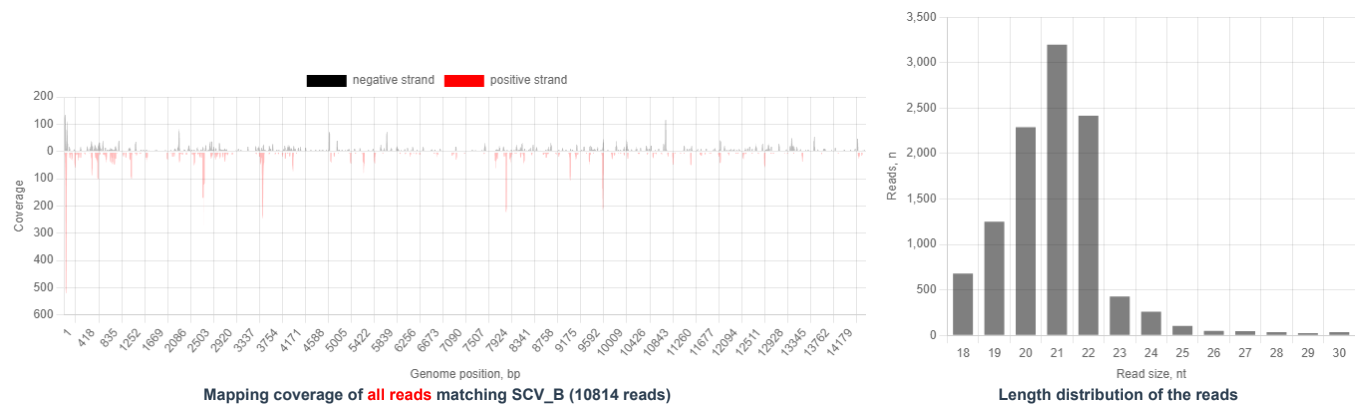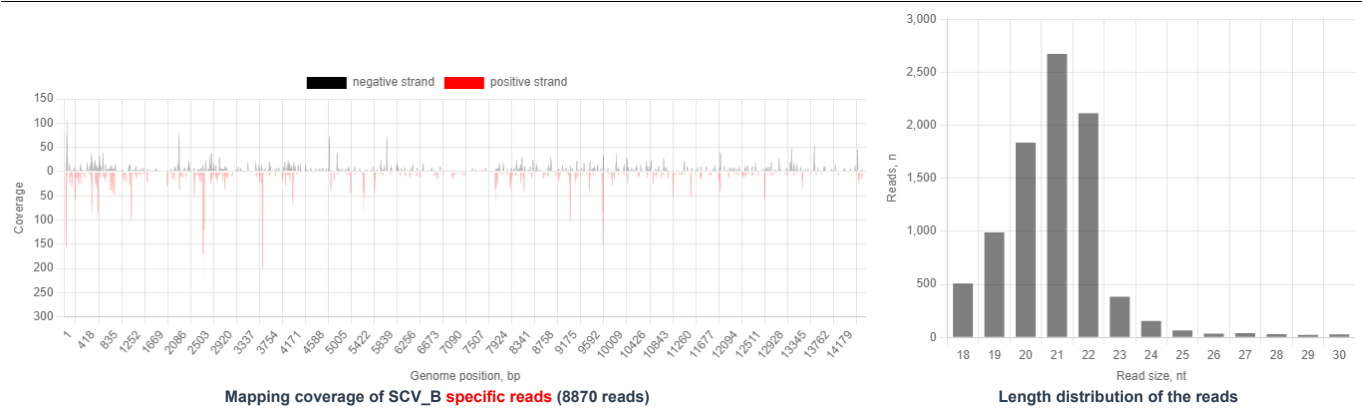

| Dataset | Input reads | Virus | Reference  | Mapped reads | Mapped reads, % | RPKM  | Forward/Reverse balance | Nonredundant, % | Strain specific | Strain specific, % from total mapped reads | Strain specific, RPKM |
|---------|-------------|-------|------------|--------------|-----------------|-------|-------------------------|-----------------|-----------------|--------------------------------------------|-----------------------|
| 2A_2    | 10000000    | SMoV  | SMoV_RNA1A | 7992         | 0.080           | 113.6 | 1.5                     | 37.2            | 4257            | 53.3                                       | 60.5                  |

| Dataset | Input reads | Virus | Reference | Mapped reads | Mapped reads, % | RPKM | Forward/Reverse balance | Nonredundant, % | Strain specific | Strain specific, % from total mapped reads | Strain specific, RPKM |
|---------|-------------|-------|-----------|--------------|-----------------|------|-------------------------|-----------------|-----------------|--------------------------------------------|-----------------------|
|---------|-------------|-------|-----------|--------------|-----------------|------|-------------------------|-----------------|-----------------|--------------------------------------------|-----------------------|

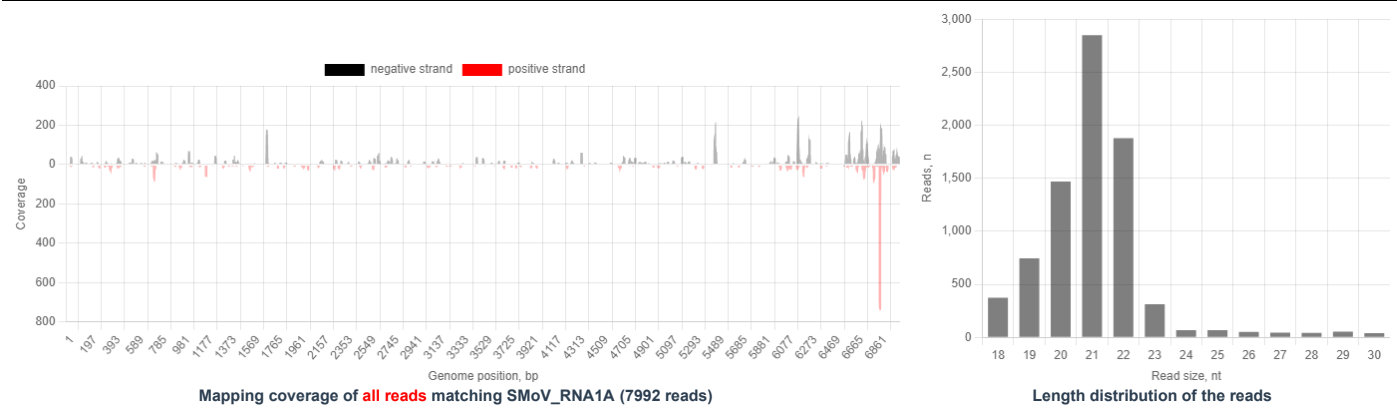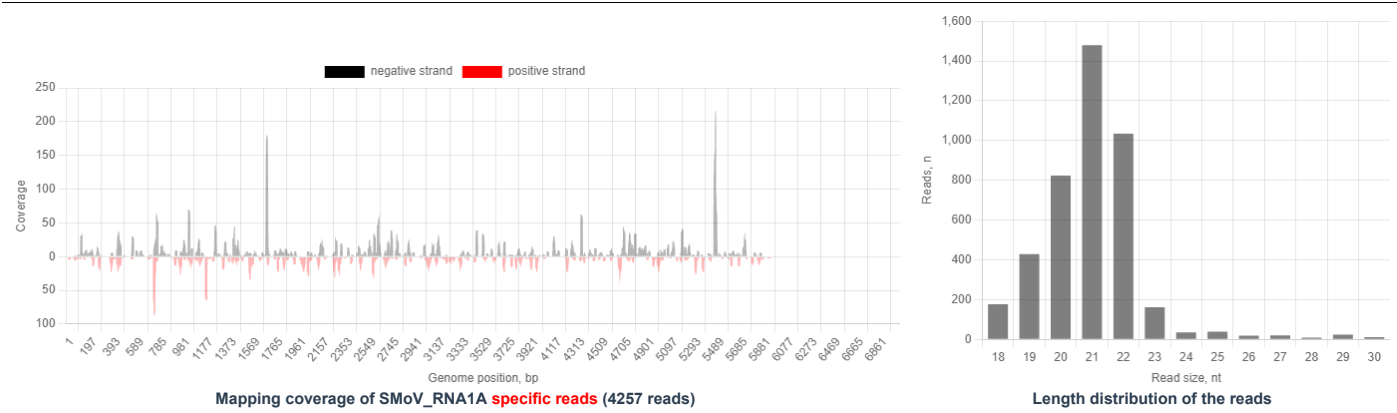

| Dataset | Input reads | Virus | Reference  | Mapped reads | Mapped reads, % | RPKM  | Forward/Reverse balance | Nonredundant, % | Strain specific | Strain specific, % from total mapped reads | Strain specific, RPKM |
|---------|-------------|-------|------------|--------------|-----------------|-------|-------------------------|-----------------|-----------------|--------------------------------------------|-----------------------|
| 2A_2    | 10000000    | SMoV  | SMoV_RNA1B | 7155         | 0.072           | 101.5 | 1.1                     | 37.9            | 3443            | 48.1                                       | 48.8                  |

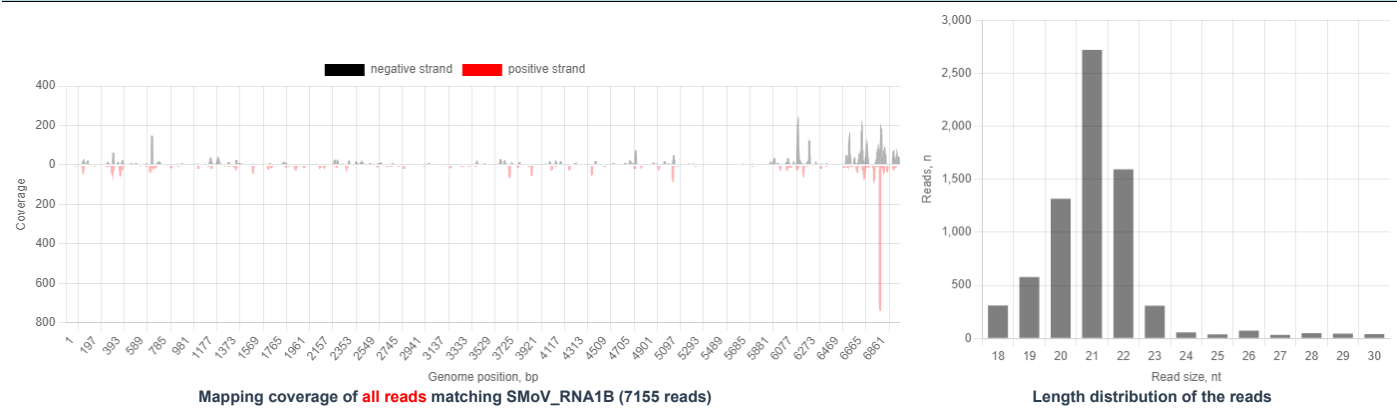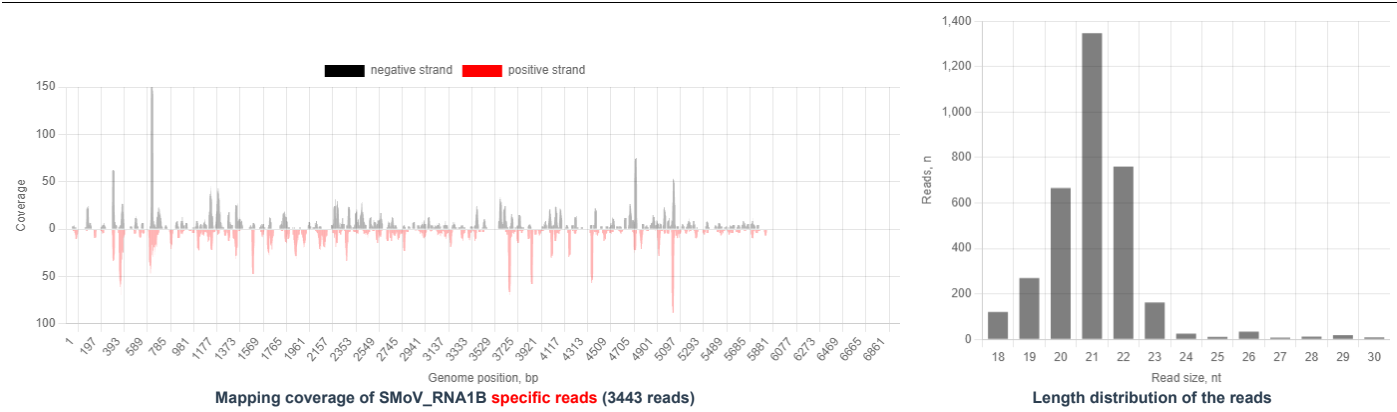

| Dataset | Input reads | Virus | Reference  | Mapped reads | Mapped reads, % | RPKM  | Forward/Reverse balance | Nonredundant, % | Strain specific | Strain specific, % from total mapped reads | Strain specific, RPKM |
|---------|-------------|-------|------------|--------------|-----------------|-------|-------------------------|-----------------|-----------------|--------------------------------------------|-----------------------|
| 2A_2    | 10000000    | SMoV  | SMoV_RNA1C | 7767         | 0.078           | 110.3 | 1.3                     | 38.7            | 4015            | 51.7                                       | 57.0                  |



| Dataset | Input reads | Virus | Reference | Mapped reads | Mapped reads, % | RPKM | Forward/Reverse balance | Nonredundant, % | Strain specific | Strain specific, % from total mapped reads | Strain specific, RPKM |
|---------|-------------|-------|-----------|--------------|-----------------|------|-------------------------|-----------------|-----------------|--------------------------------------------|-----------------------|
|---------|-------------|-------|-----------|--------------|-----------------|------|-------------------------|-----------------|-----------------|--------------------------------------------|-----------------------|

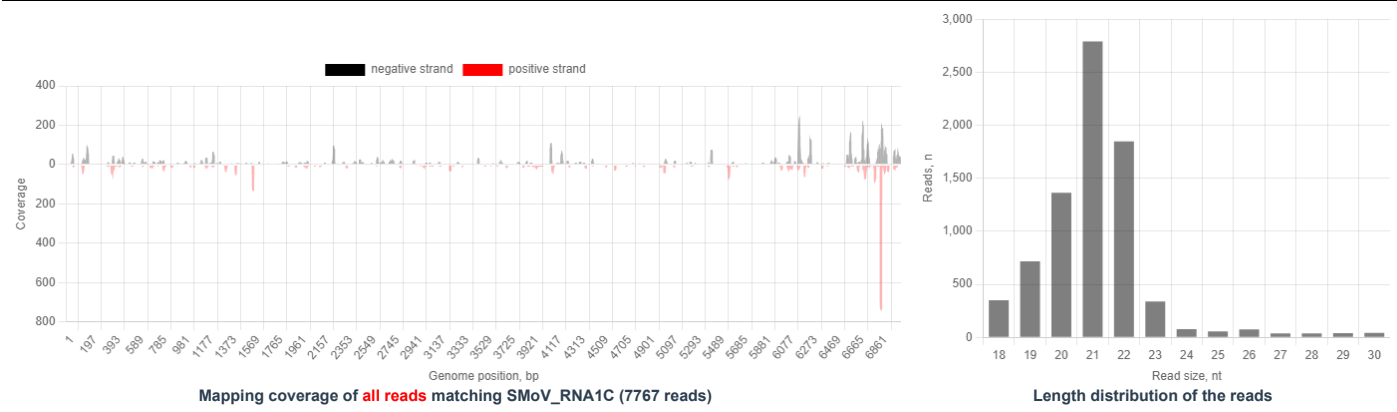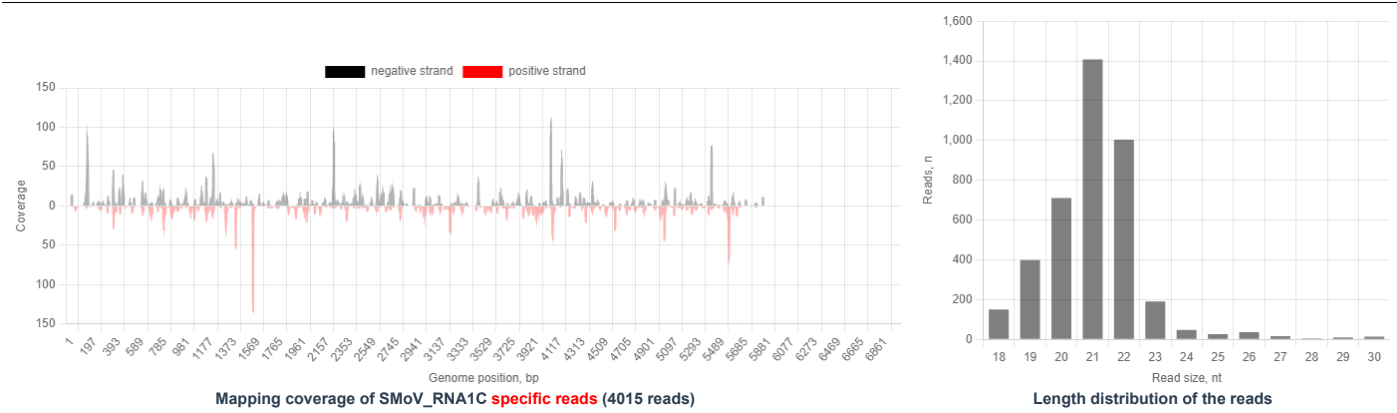

| Dataset | Input reads | Virus | Reference  | Mapped reads | Mapped reads, % | RPKM | Forward/Reverse balance | Nonredundant, % | Strain specific | Strain specific, % from total mapped reads | Strain specific, RPKM |
|---------|-------------|-------|------------|--------------|-----------------|------|-------------------------|-----------------|-----------------|--------------------------------------------|-----------------------|
| 2A_2    | 10000000    | SMoV  | SMoV_RNA2A | 4719         | 0.047           | 75.3 | 1.5                     | 42.2            | 3172            | 67.2                                       | 50.6                  |

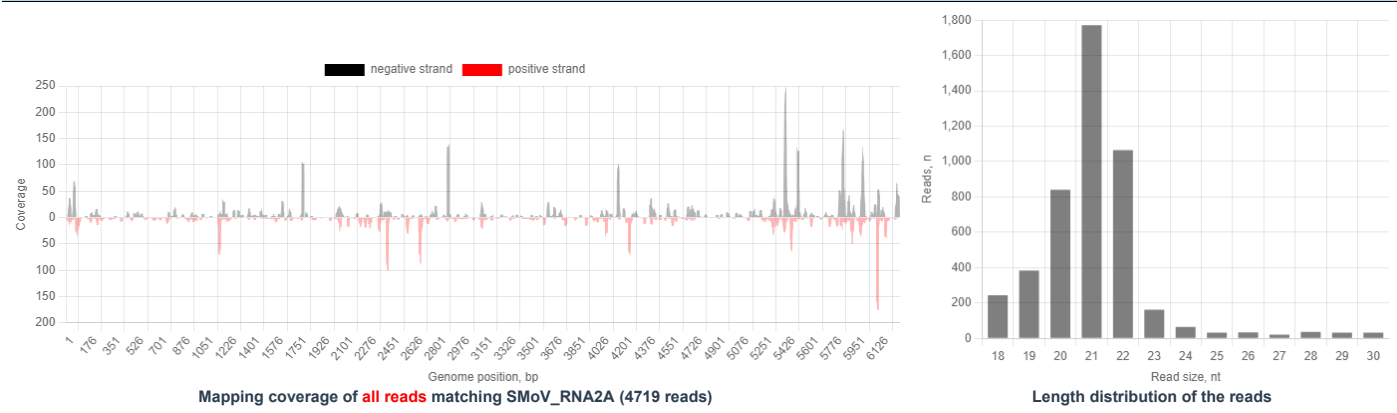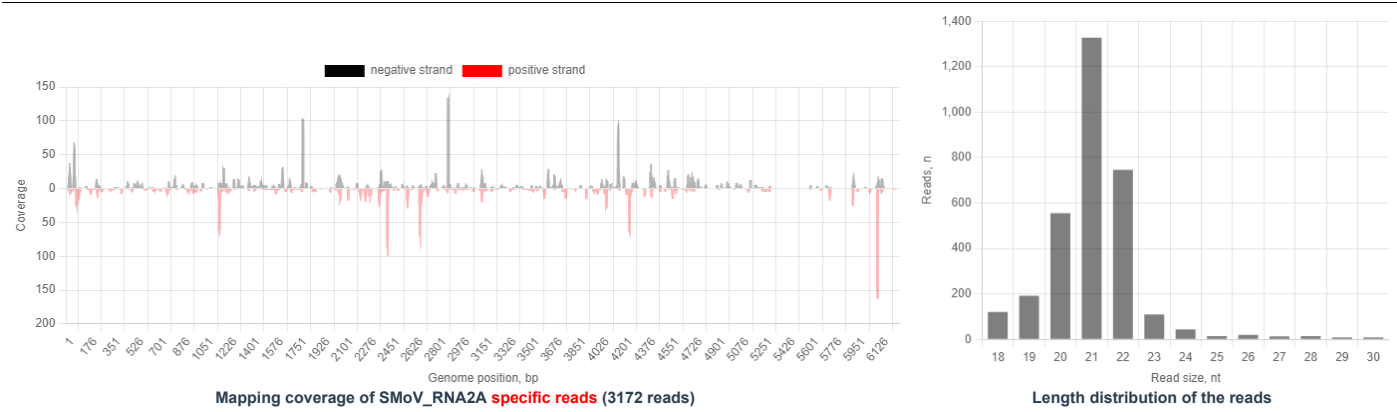

| Dataset | Input reads | Virus | Reference  | Mapped reads | Mapped reads, % | RPKM | Forward/Reverse balance | Nonredundant, % | Strain specific | Strain specific, % from total mapped reads | Strain specific, RPKM |
|---------|-------------|-------|------------|--------------|-----------------|------|-------------------------|-----------------|-----------------|--------------------------------------------|-----------------------|
| 2A_2    | 10000000    | SMoV  | SMoV_RNA2B | 4073         | 0.041           | 64.4 | 1.6                     | 46.4            | 2198            | 54.0                                       | 34.8                  |

| Dataset | Input reads | Virus | Reference | Mapped reads | Mapped reads, % | RPKM | Forward/Reverse balance | Nonredundant, % | Strain specific | Strain specific, % from total mapped reads | Strain specific, RPKM |
|---------|-------------|-------|-----------|--------------|-----------------|------|-------------------------|-----------------|-----------------|--------------------------------------------|-----------------------|
|---------|-------------|-------|-----------|--------------|-----------------|------|-------------------------|-----------------|-----------------|--------------------------------------------|-----------------------|

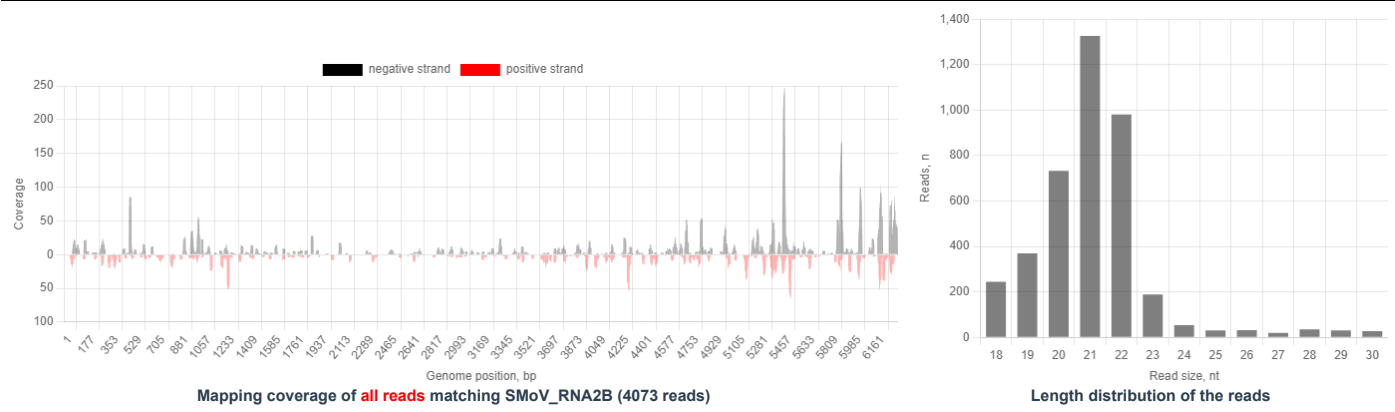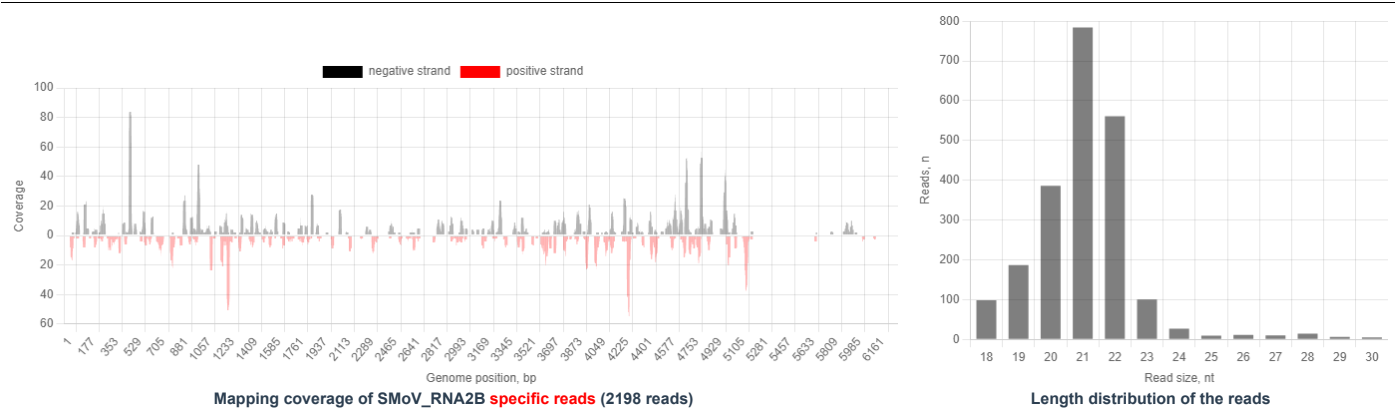

| Dataset | Input reads | Virus | Reference  | Mapped reads | Mapped reads, % | RPKM | Forward/Reverse balance | Nonredundant, % | Strain specific | Strain specific, % from total mapped reads | Strain specific, RPKM |
|---------|-------------|-------|------------|--------------|-----------------|------|-------------------------|-----------------|-----------------|--------------------------------------------|-----------------------|
| 2A_2    | 10000000    | SMoV  | SMoV_RNA2C | 6073         | 0.061           | 95.8 | 1.4                     | 36.7            | 2588            | 42.6                                       | 40.8                  |

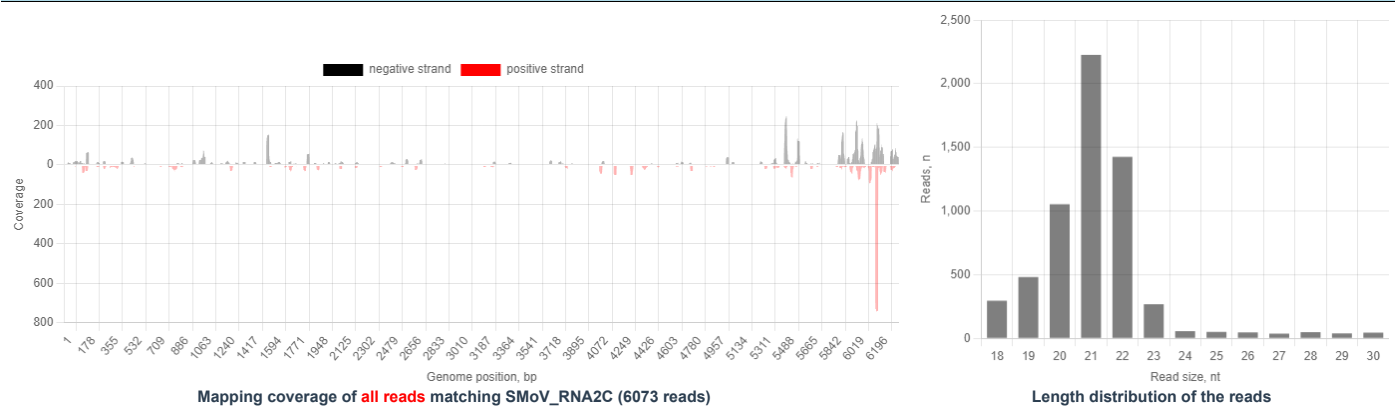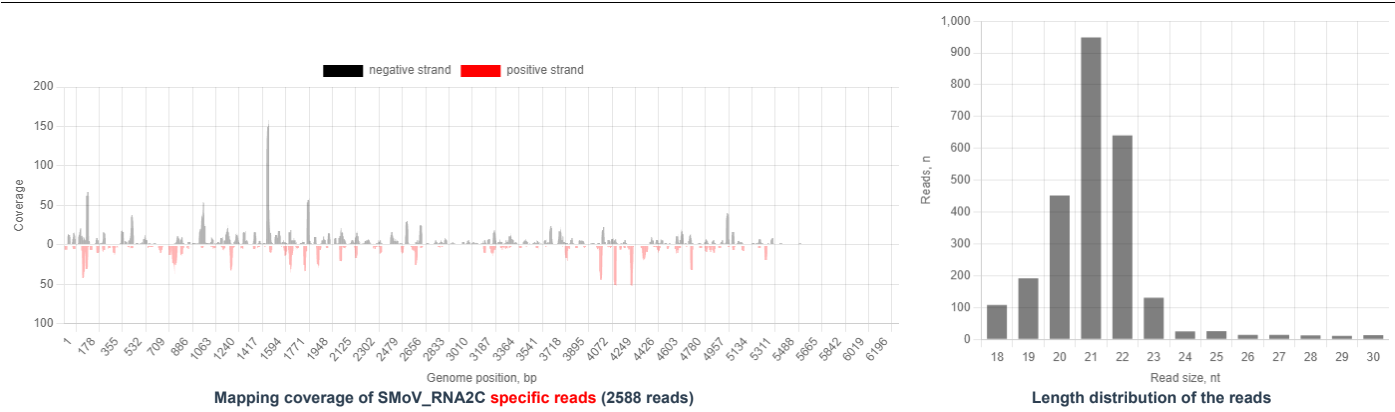

| Dataset | Input reads | Virus | Reference | Mapped reads | Mapped reads, % | RPKM | Forward/Reverse balance | Nonredundant, % | Strain specific | Strain specific, % from total mapped reads | Strain specific, RPKM |
|---------|-------------|-------|-----------|--------------|-----------------|------|-------------------------|-----------------|-----------------|--------------------------------------------|-----------------------|
| 2A_2    | 10000000    | StrV1 | StrV1_A   | 7722         | 0.077           | 54.5 | 0.9                     | 43.7            | 6044            | 78.3                                       | 42.7                  |

| Dataset | Input reads | Virus | Reference | Mapped reads | Mapped reads, % | RPKM | Forward/Reverse balance | Nonredundant, % | Strain specific | Strain specific, % from total mapped reads | Strain specific, RPKM |
|---------|-------------|-------|-----------|--------------|-----------------|------|-------------------------|-----------------|-----------------|--------------------------------------------|-----------------------|
|---------|-------------|-------|-----------|--------------|-----------------|------|-------------------------|-----------------|-----------------|--------------------------------------------|-----------------------|

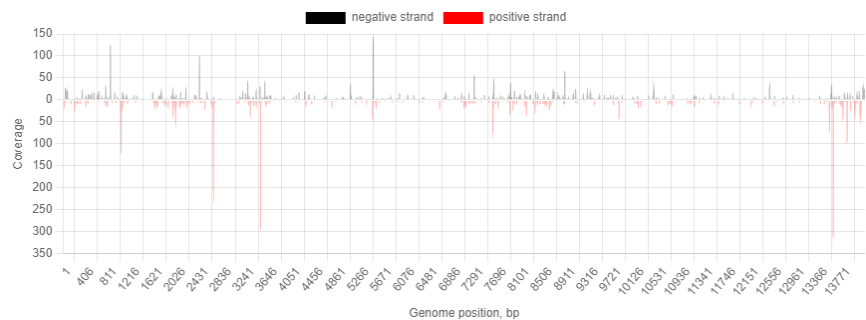

Mapping coverage of **all reads matching StrV1\_A (7722 reads)**

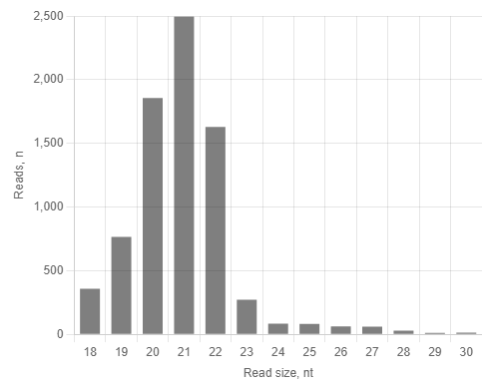

Length distribution of the reads

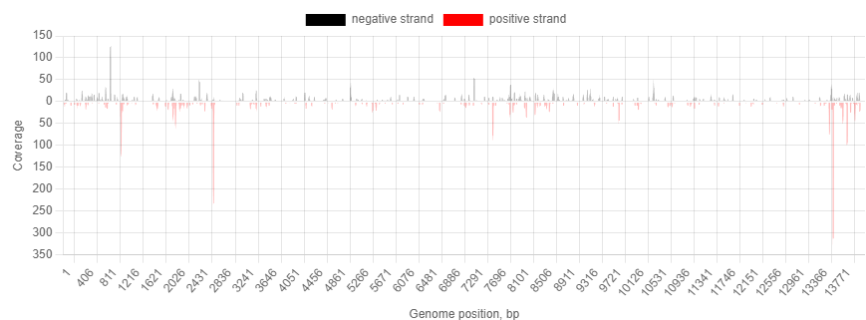

Mapping coverage of **StrV1\_A specific reads (6044 reads)**

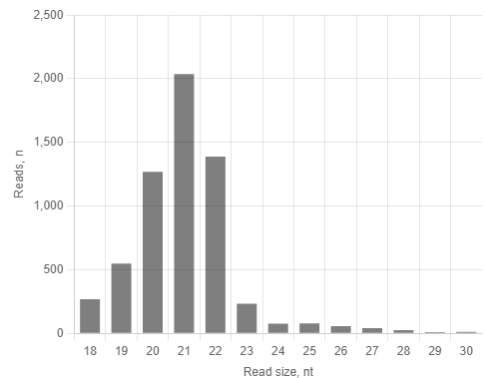

Length distribution of the reads

| Dataset | Input reads | Virus | Reference | Mapped reads | Mapped reads, % | RPKM | Forward/Reverse balance | Nonredundant, % | Strain specific | Strain specific, % from total mapped reads | Strain specific, RPKM |
|---------|-------------|-------|-----------|--------------|-----------------|------|-------------------------|-----------------|-----------------|--------------------------------------------|-----------------------|
| 2A_2    | 10000000    | StrV1 | StrV1_B   | 12995        | 0.130           | 92.6 | 1.3                     | 34.6            | 12448           | 95.8                                       | 88.7                  |

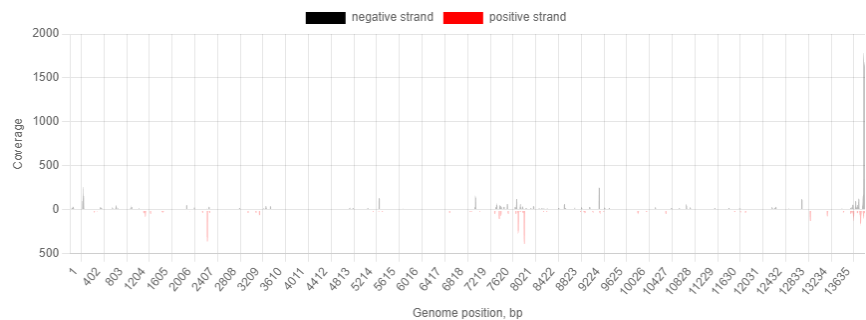

Mapping coverage of **all reads matching StrV1\_B (12995 reads)**

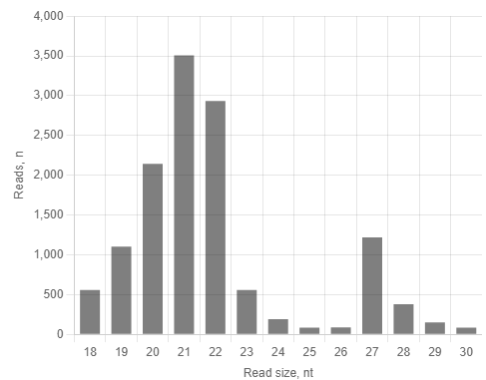

Length distribution of the reads

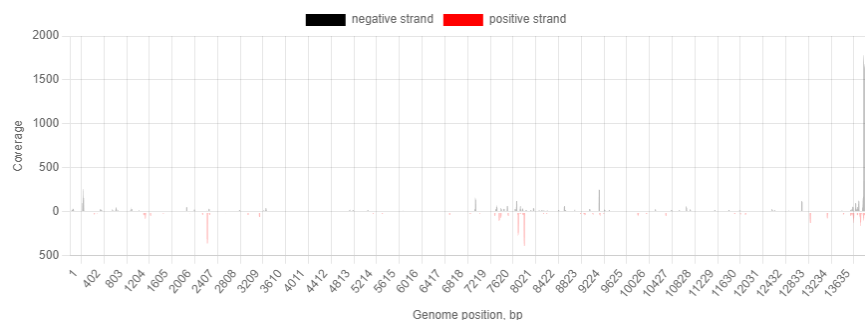

Mapping coverage of **StrV1\_B specific reads (12448 reads)**

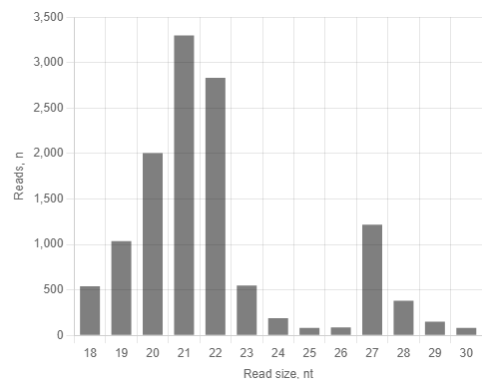

Length distribution of the reads

| Dataset | Input reads | Virus | Reference | Mapped reads | Mapped reads, % | RPKM | Forward/Reverse balance | Nonredundant, % | Strain specific | Strain specific, % from total mapped reads | Strain specific, RPKM |
|---------|-------------|-------|-----------|--------------|-----------------|------|-------------------------|-----------------|-----------------|--------------------------------------------|-----------------------|
| 2A_2    | 10000000    | StrV1 | StrV1_C   | 5025         | 0.050           | 35.3 | 1.0                     | 47.7            | 3458            | 68.8                                       | 24.3                  |

| Dataset | Input reads | Virus | Reference | Mapped reads | Mapped reads, % | RPKM | Forward/Reverse balance | Nonredundant, % | Strain specific | Strain specific, % from total mapped reads | Strain specific, RPKM |
|---------|-------------|-------|-----------|--------------|-----------------|------|-------------------------|-----------------|-----------------|--------------------------------------------|-----------------------|
|---------|-------------|-------|-----------|--------------|-----------------|------|-------------------------|-----------------|-----------------|--------------------------------------------|-----------------------|

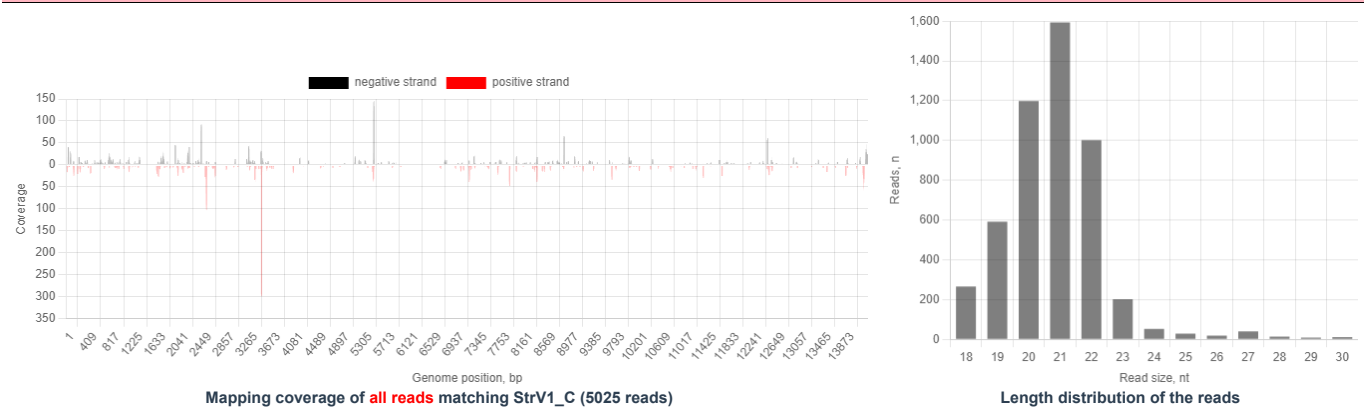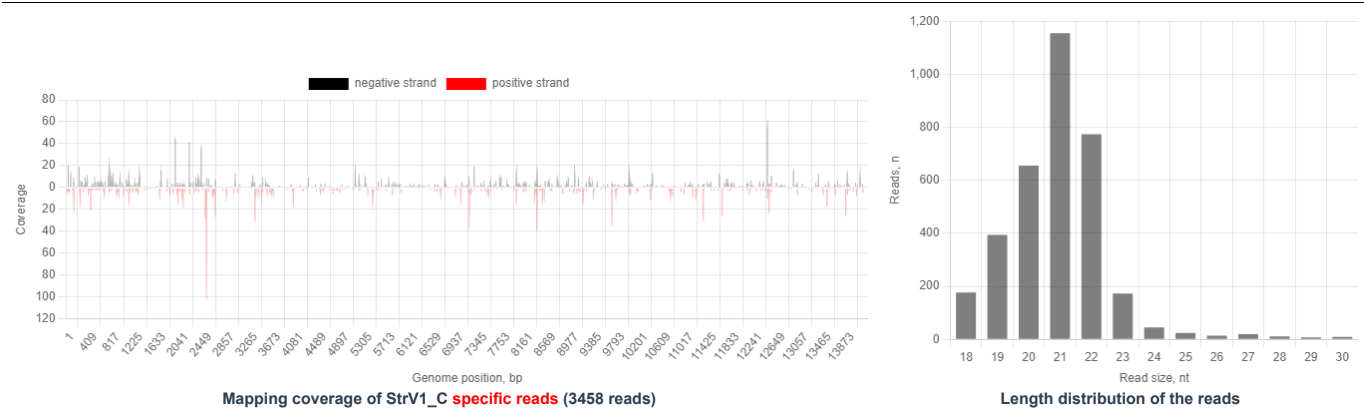

### Mappings of the 2A\_3 reads against the viral references.

| Dataset | Input reads | Virus | Reference | Mapped reads | Mapped reads, % | RPKM | Forward/Reverse balance | Nonredundant, % | Strain specific | Strain specific, % from total mapped reads | Strain specific, RPKM |
|---------|-------------|-------|-----------|--------------|-----------------|------|-------------------------|-----------------|-----------------|--------------------------------------------|-----------------------|
| 2A_3    | 10000000    | SCV   | SCV_A     | 10906        | 0.109           | 75.0 | 0.8                     | 34.3            | 11245           | 103.1                                      | 62.3                  |

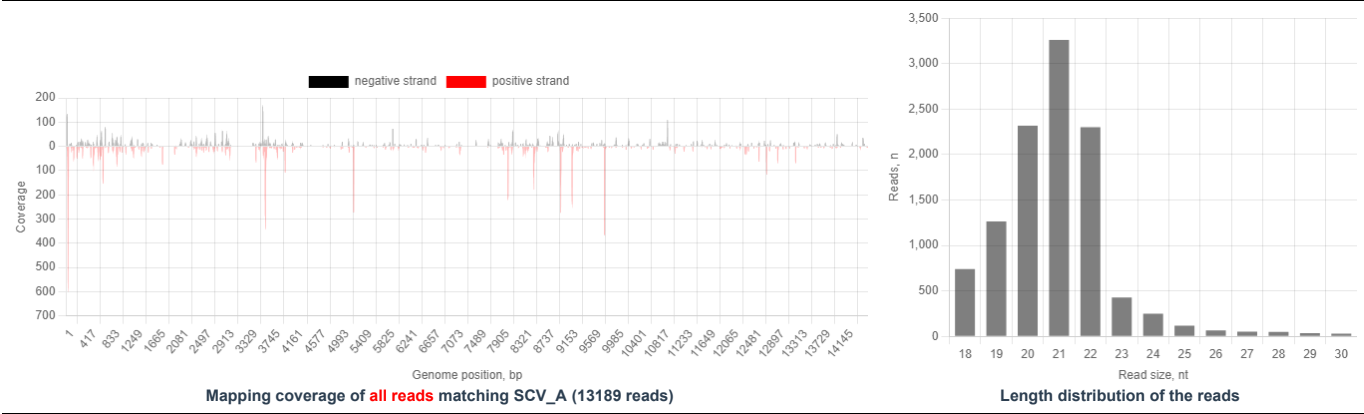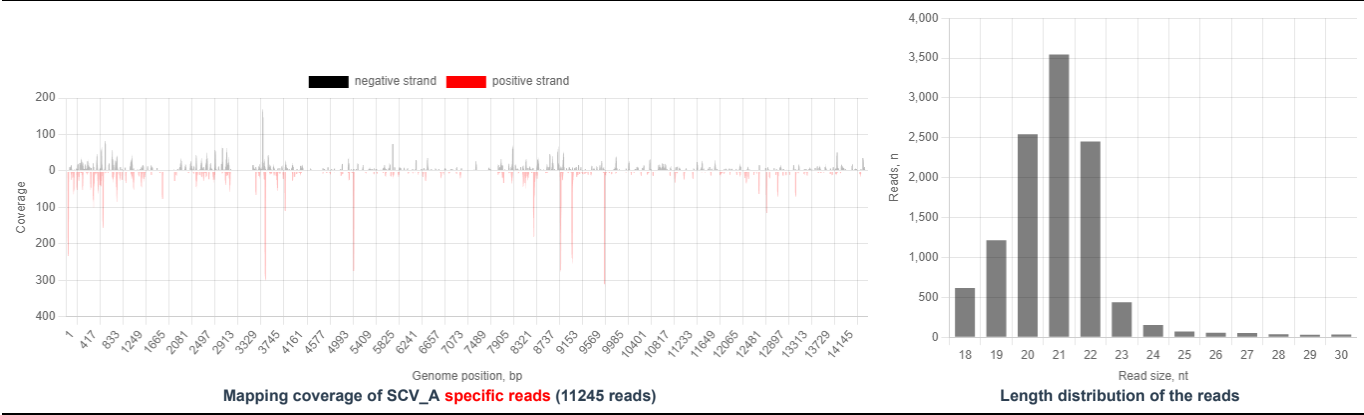

| Dataset | Input reads | Virus | Reference | Mapped reads | Mapped reads, % | RPKM | Forward/Reverse balance | Nonredundant, % | Strain specific | Strain specific, % from total mapped reads | Strain specific, RPKM |
|---------|-------------|-------|-----------|--------------|-----------------|------|-------------------------|-----------------|-----------------|--------------------------------------------|-----------------------|
| 2A_3    | 10000000    | SCV   | SCV_B     | 10718        | 0.107           | 73.6 | 0.8                     | 34.9            | 8870            | 82.8                                       | 61.0                  |

| Dataset | Input reads | Virus | Reference | Mapped reads | Mapped reads, % | RPKM | Forward/Reverse balance | Nonredundant, % | Strain specific | Strain specific, % from total mapped reads | Strain specific, RPKM |
|---------|-------------|-------|-----------|--------------|-----------------|------|-------------------------|-----------------|-----------------|--------------------------------------------|-----------------------|
|---------|-------------|-------|-----------|--------------|-----------------|------|-------------------------|-----------------|-----------------|--------------------------------------------|-----------------------|

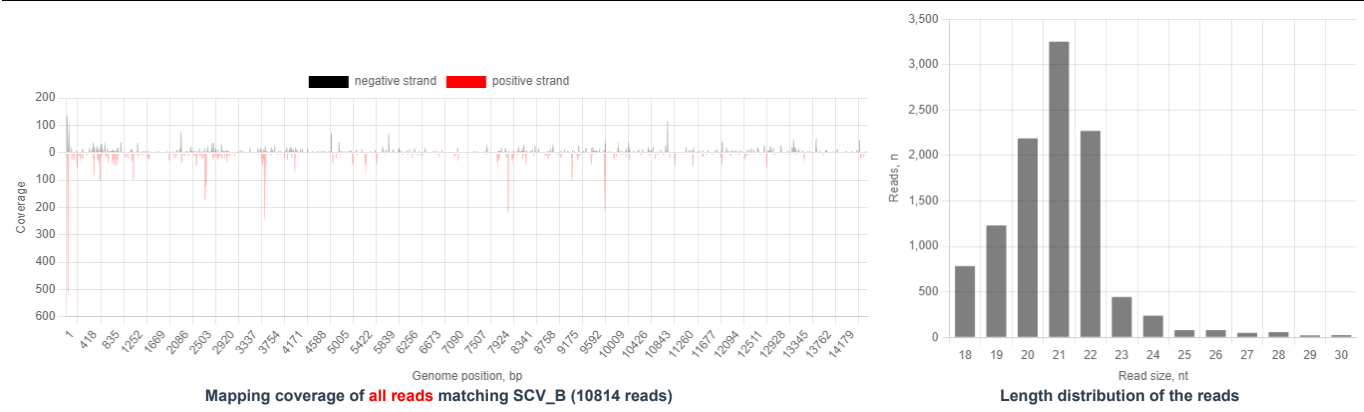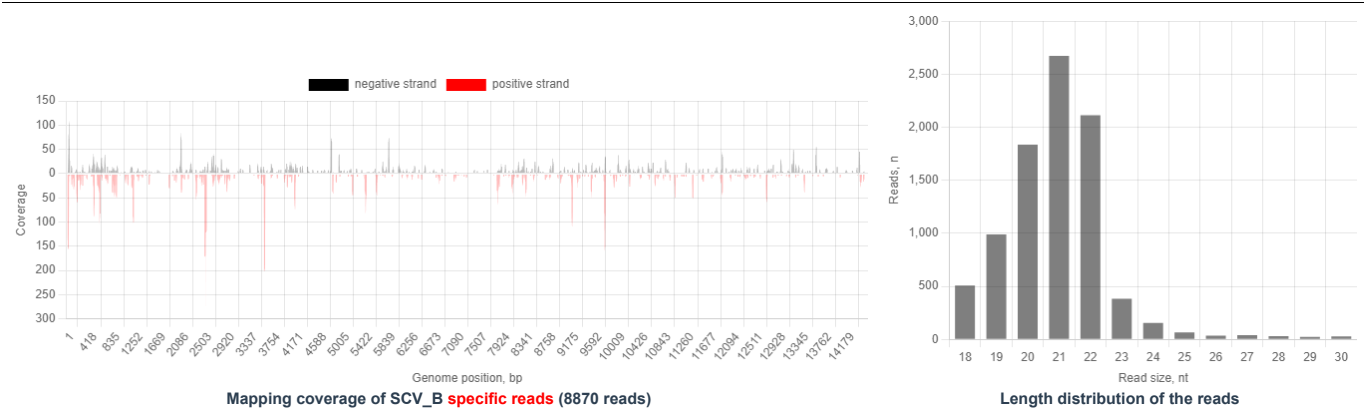

| Dataset | Input reads | Virus | Reference  | Mapped reads | Mapped reads, % | RPKM  | Forward/Reverse balance | Nonredundant, % | Strain specific | Strain specific, % from total mapped reads | Strain specific, RPKM |
|---------|-------------|-------|------------|--------------|-----------------|-------|-------------------------|-----------------|-----------------|--------------------------------------------|-----------------------|
| 2A_3    | 10000000    | SMoV  | SMoV_RNA1A | 7497         | 0.075           | 106.6 | 1.6                     | 31.9            | 4257            | 56.8                                       | 57.1                  |

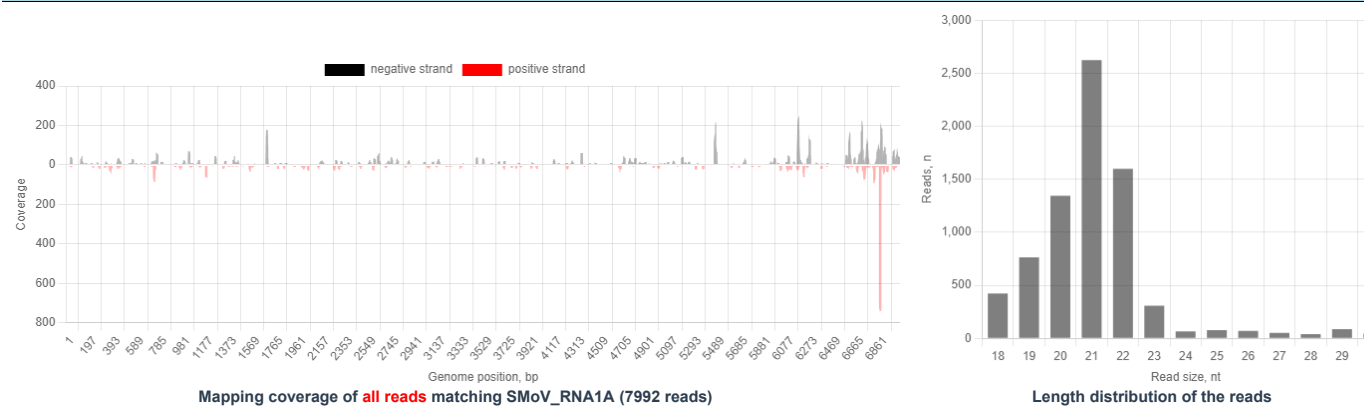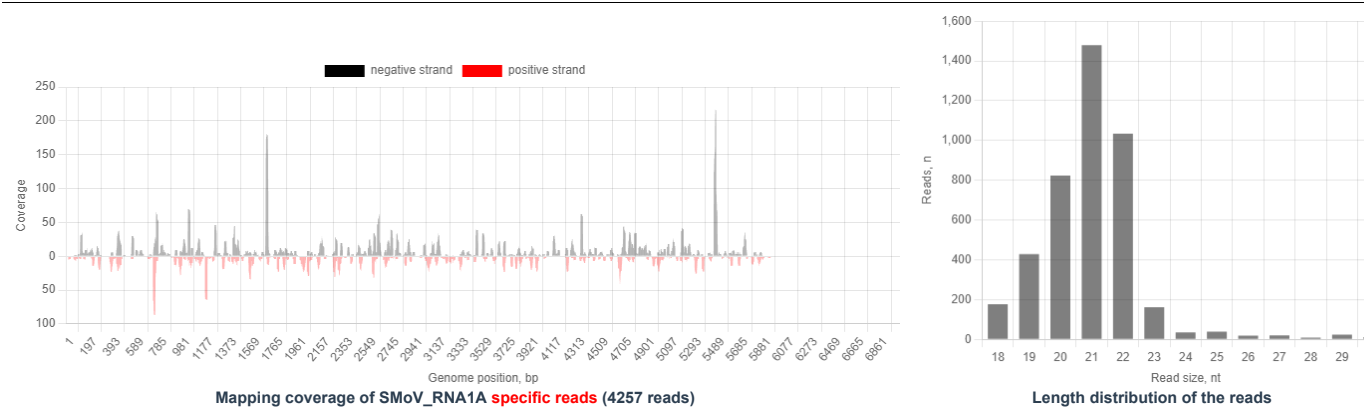

| Dataset | Input reads | Virus | Reference  | Mapped reads | Mapped reads, % | RPKM | Forward/Reverse balance | Nonredundant, % | Strain specific | Strain specific, % from total mapped reads | Strain specific, RPKM |
|---------|-------------|-------|------------|--------------|-----------------|------|-------------------------|-----------------|-----------------|--------------------------------------------|-----------------------|
| 2A_3    | 10000000    | SMoV  | SMoV_RNA1B | 6494         | 0.065           | 92.1 | 1.3                     | 32.6            | 3443            | 53.0                                       | 44.0                  |

| Dataset | Input reads | Virus | Reference | Mapped reads | Mapped reads, % | RPKM | Forward/Reverse balance | Nonredundant, % | Strain specific | Strain specific, % from total mapped reads | Strain specific, RPKM |
|---------|-------------|-------|-----------|--------------|-----------------|------|-------------------------|-----------------|-----------------|--------------------------------------------|-----------------------|
|---------|-------------|-------|-----------|--------------|-----------------|------|-------------------------|-----------------|-----------------|--------------------------------------------|-----------------------|

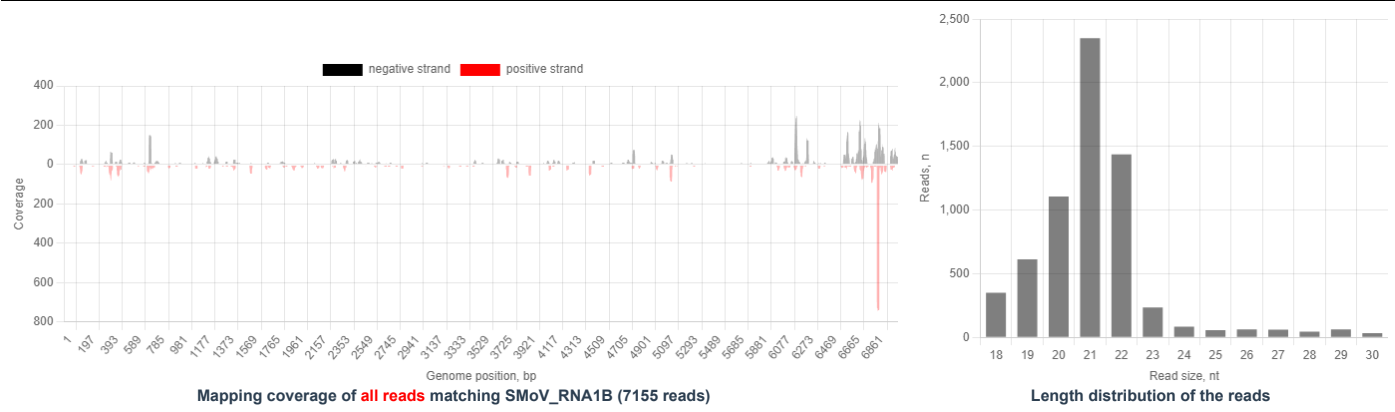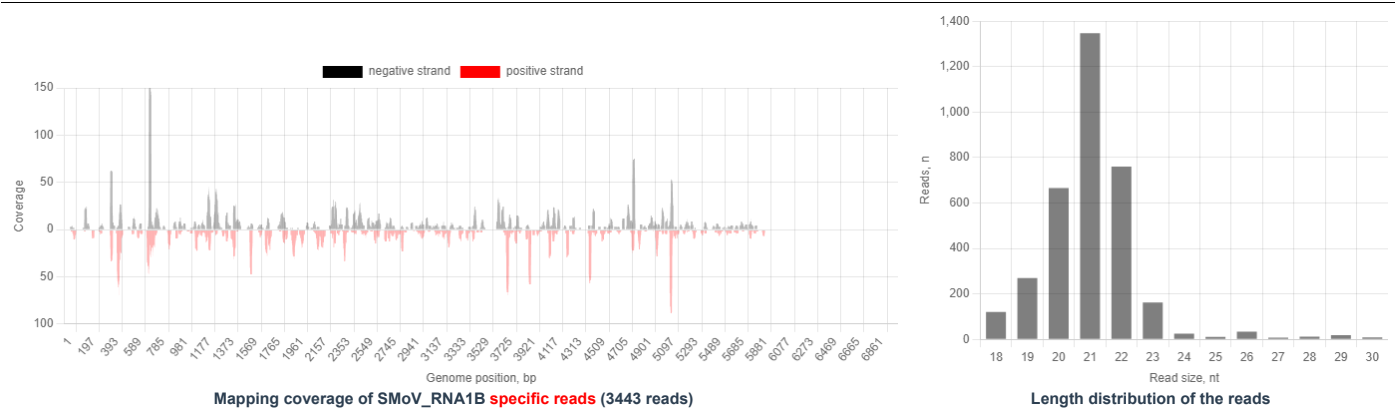

| Dataset | Input reads | Virus | Reference  | Mapped reads | Mapped reads, % | RPKM  | Forward/Reverse balance | Nonredundant, % | Strain specific | Strain specific, % from total mapped reads | Strain specific, RPKM |
|---------|-------------|-------|------------|--------------|-----------------|-------|-------------------------|-----------------|-----------------|--------------------------------------------|-----------------------|
| 2A_3    | 10000000    | SMoV  | SMoV_RNA1C | 7238         | 0.072           | 102.8 | 1.4                     | 33.0            | 4015            | 55.5                                       | 53.6                  |

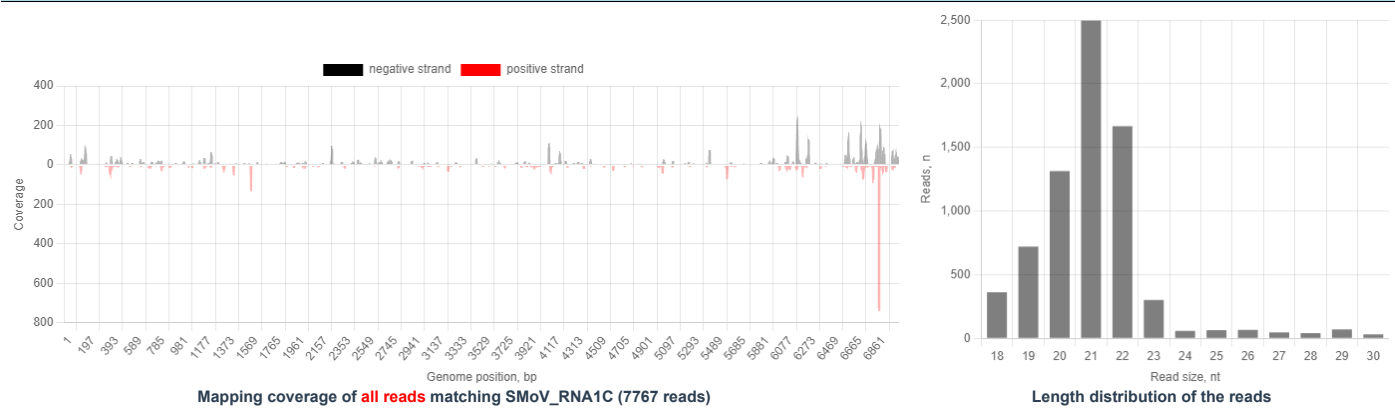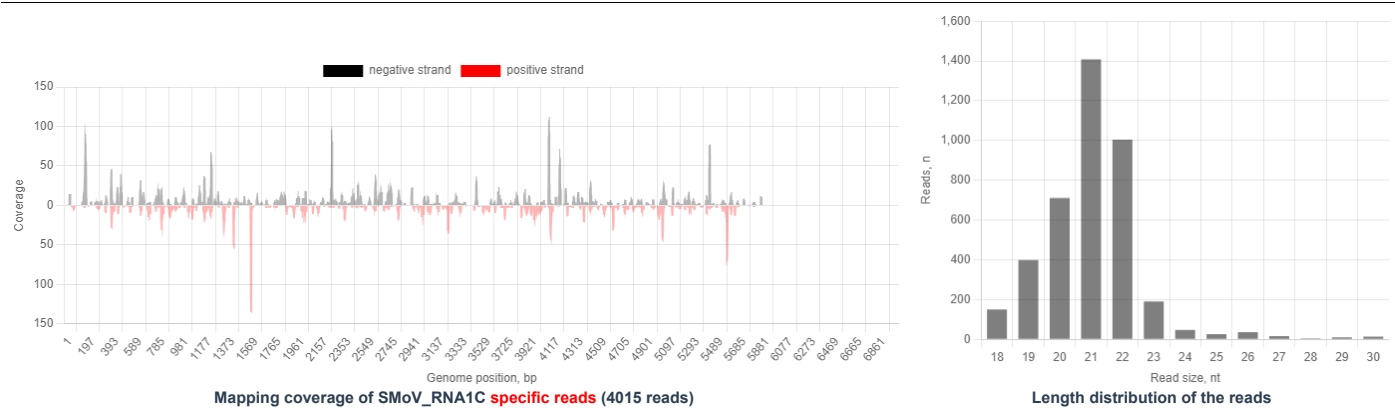

| Dataset | Input reads | Virus | Reference  | Mapped reads | Mapped reads, % | RPKM | Forward/Reverse balance | Nonredundant, % | Strain specific | Strain specific, % from total mapped reads | Strain specific, RPKM |
|---------|-------------|-------|------------|--------------|-----------------|------|-------------------------|-----------------|-----------------|--------------------------------------------|-----------------------|
| 2A_3    | 10000000    | SMoV  | SMoV_RNA2A | 4309         | 0.043           | 68.8 | 1.7                     | 35.0            | 3172            | 73.6                                       | 42.7                  |

| Dataset | Input reads | Virus | Reference | Mapped reads | Mapped reads, % | RPKM | Forward/Reverse balance | Nonredundant, % | Strain specific | Strain specific, % from total mapped reads | Strain specific, RPKM |
|---------|-------------|-------|-----------|--------------|-----------------|------|-------------------------|-----------------|-----------------|--------------------------------------------|-----------------------|
|---------|-------------|-------|-----------|--------------|-----------------|------|-------------------------|-----------------|-----------------|--------------------------------------------|-----------------------|

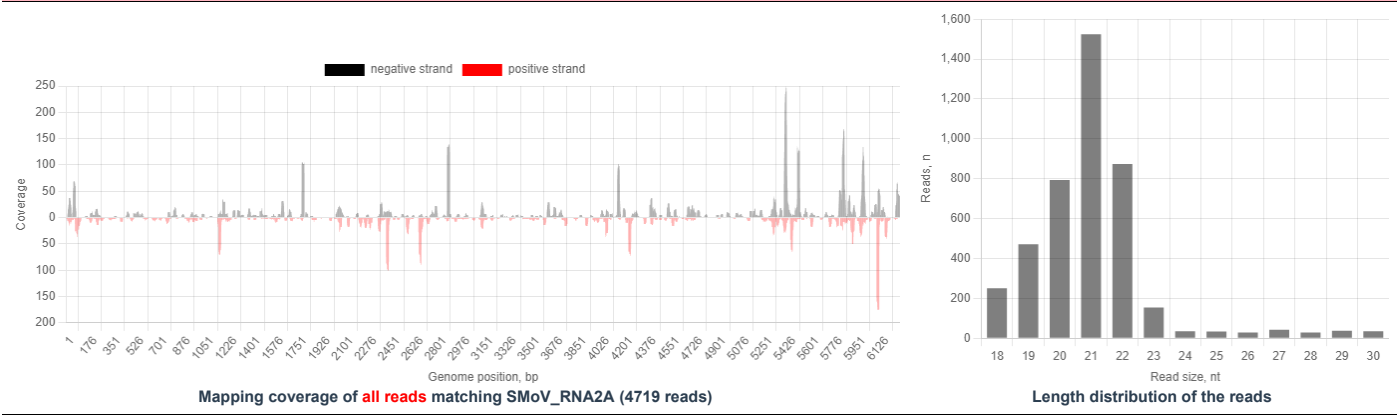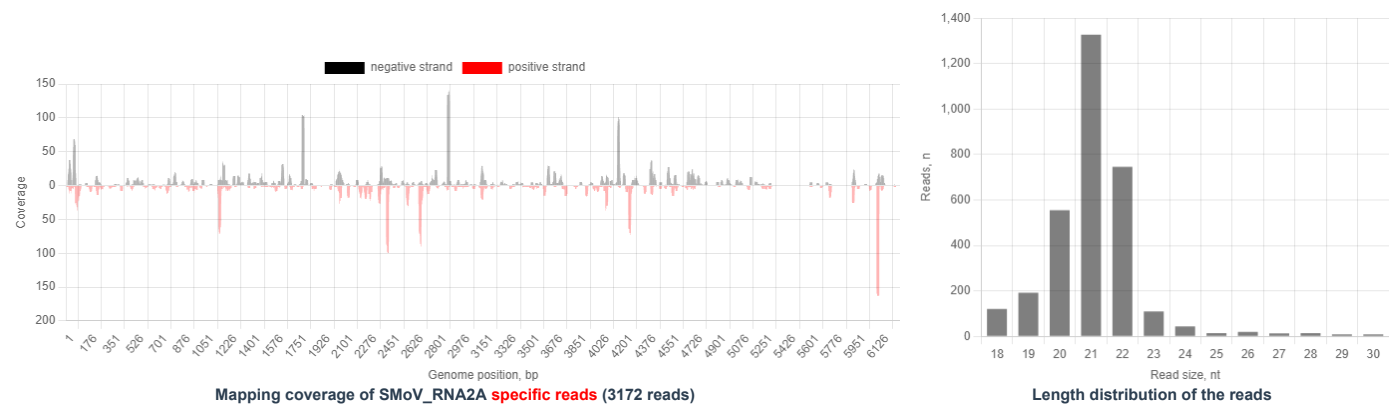

| Dataset | Input reads | Virus | Reference  | Mapped reads | Mapped reads, % | RPKM | Forward/Reverse balance | Nonredundant, % | Strain specific | Strain specific, % from total mapped reads | Strain specific, RPKM |
|---------|-------------|-------|------------|--------------|-----------------|------|-------------------------|-----------------|-----------------|--------------------------------------------|-----------------------|
| 2A_3    | 10000000    | SMoV  | SMoV_RNA2B | 4178         | 0.042           | 66.1 | 1.6                     | 36.2            | 2198            | 52.6                                       | 35.7                  |

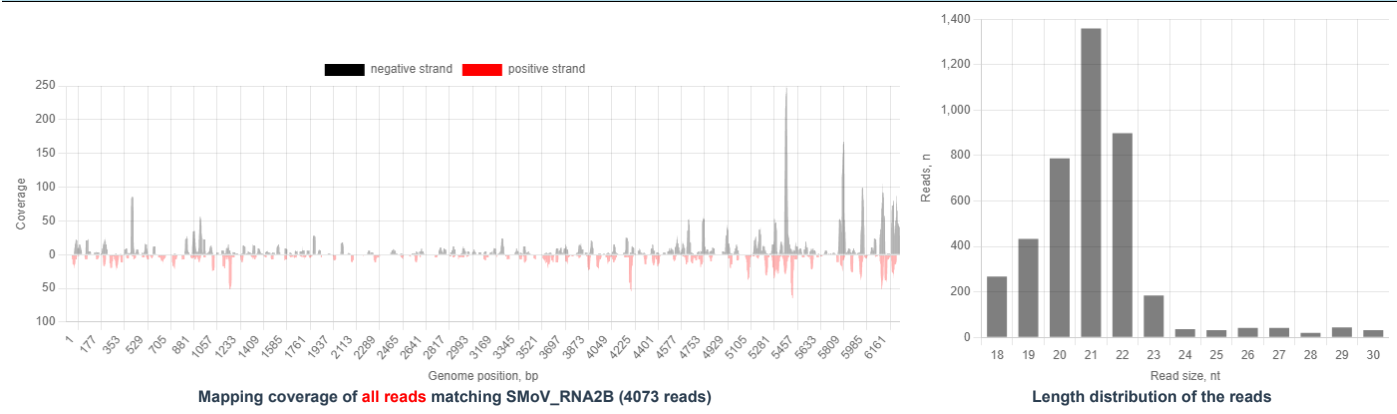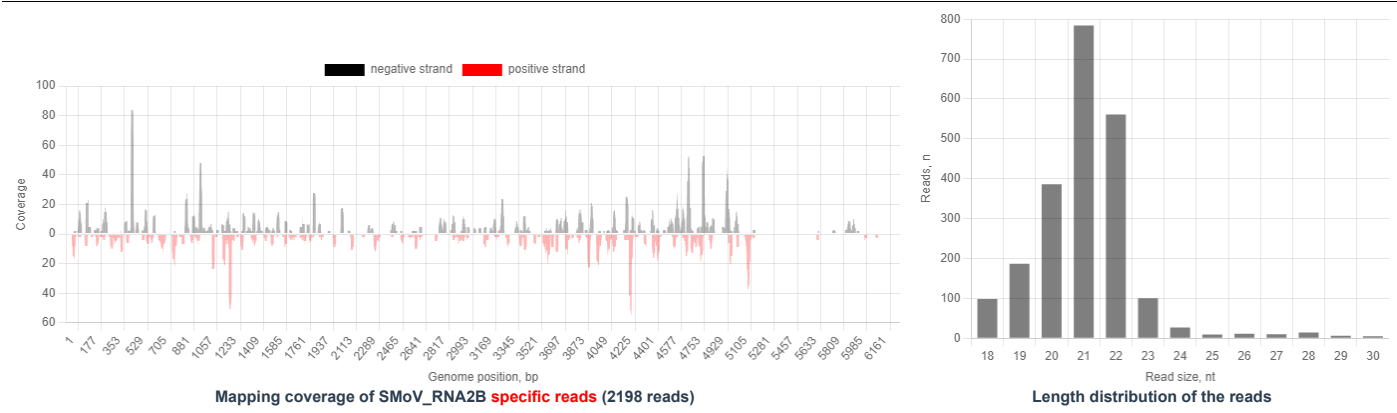

| Dataset | Input reads | Virus | Reference  | Mapped reads | Mapped reads, % | RPKM | Forward/Reverse balance | Nonredundant, % | Strain specific | Strain specific, % from total mapped reads | Strain specific, RPKM |
|---------|-------------|-------|------------|--------------|-----------------|------|-------------------------|-----------------|-----------------|--------------------------------------------|-----------------------|
| 2A_3    | 10000000    | SMoV  | SMoV_RNA2C | 5810         | 0.058           | 91.7 | 1.4                     | 31.3            | 2588            | 44.5                                       | 41.3                  |

| Dataset | Input reads | Virus | Reference | Mapped reads | Mapped reads, % | RPKM | Forward/Reverse balance | Nonredundant, % | Strain specific | Strain specific, % from total mapped reads | Strain specific, RPKM |
|---------|-------------|-------|-----------|--------------|-----------------|------|-------------------------|-----------------|-----------------|--------------------------------------------|-----------------------|
|---------|-------------|-------|-----------|--------------|-----------------|------|-------------------------|-----------------|-----------------|--------------------------------------------|-----------------------|

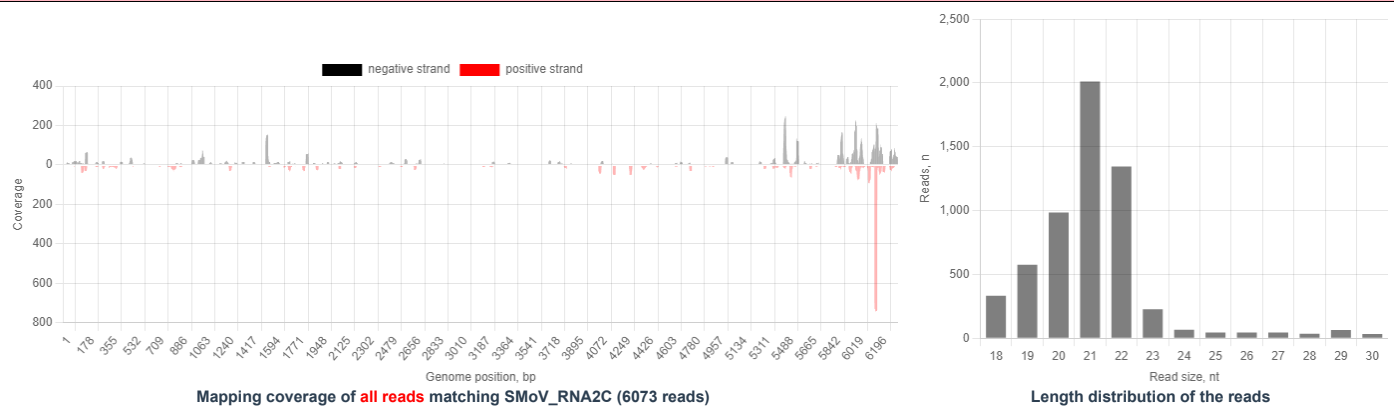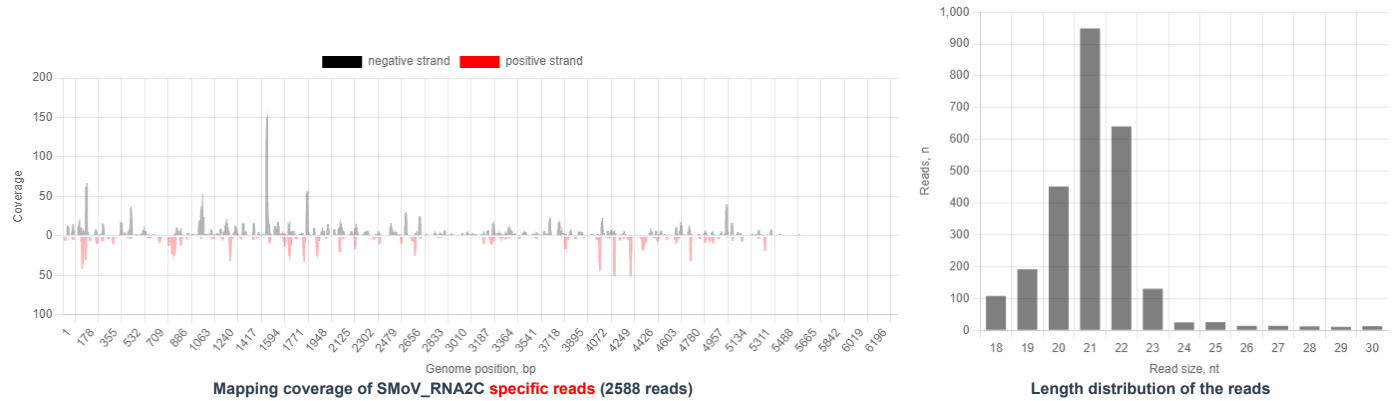

| Dataset | Input reads | Virus | Reference | Mapped reads | Mapped reads, % | RPKM | Forward/Reverse balance | Nonredundant, % | Strain specific | Strain specific, % from total mapped reads | Strain specific, RPKM |
|---------|-------------|-------|-----------|--------------|-----------------|------|-------------------------|-----------------|-----------------|--------------------------------------------|-----------------------|
| 2A_3    | 10000000    | StrV1 | StrV1_A   | 7704         | 0.077           | 54.4 | 0.9                     | 35.7            | 6044            | 78.5                                       | 43.7                  |

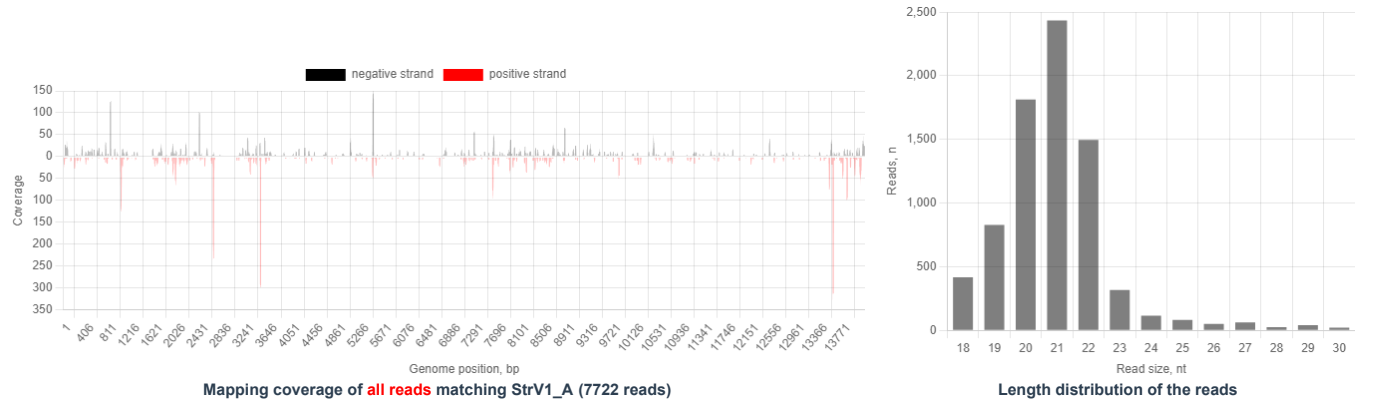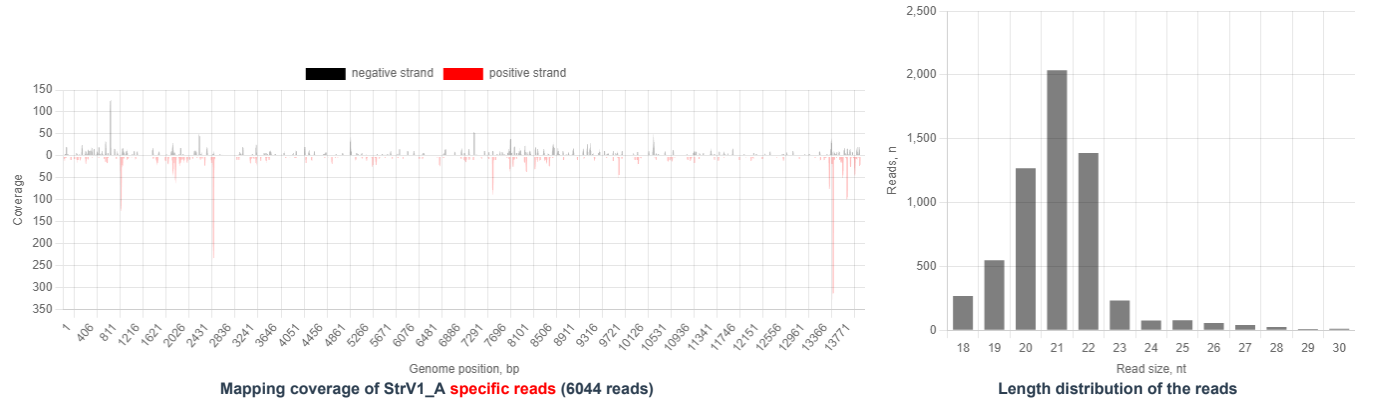

| Dataset | Input reads | Virus | Reference | Mapped reads | Mapped reads, % | RPKM  | Forward/Reverse balance | Nonredundant, % | Strain specific | Strain specific, % from total mapped reads | Strain specific, RPKM |
|---------|-------------|-------|-----------|--------------|-----------------|-------|-------------------------|-----------------|-----------------|--------------------------------------------|-----------------------|
| 2A_3    | 10000000    | StrV1 | StrV1_B   | 16466        | 0.165           | 117.4 | 1.4                     | 26.9            | 12448           | 75.6                                       | 112.9                 |



| Dataset | Input reads | Virus | Reference | Mapped reads | Mapped reads, % | RPKM | Forward/Reverse balance | Nonredundant, % | Strain specific | Strain specific, % from total mapped reads | Strain specific, RPKM |
|---------|-------------|-------|-----------|--------------|-----------------|------|-------------------------|-----------------|-----------------|--------------------------------------------|-----------------------|
|---------|-------------|-------|-----------|--------------|-----------------|------|-------------------------|-----------------|-----------------|--------------------------------------------|-----------------------|

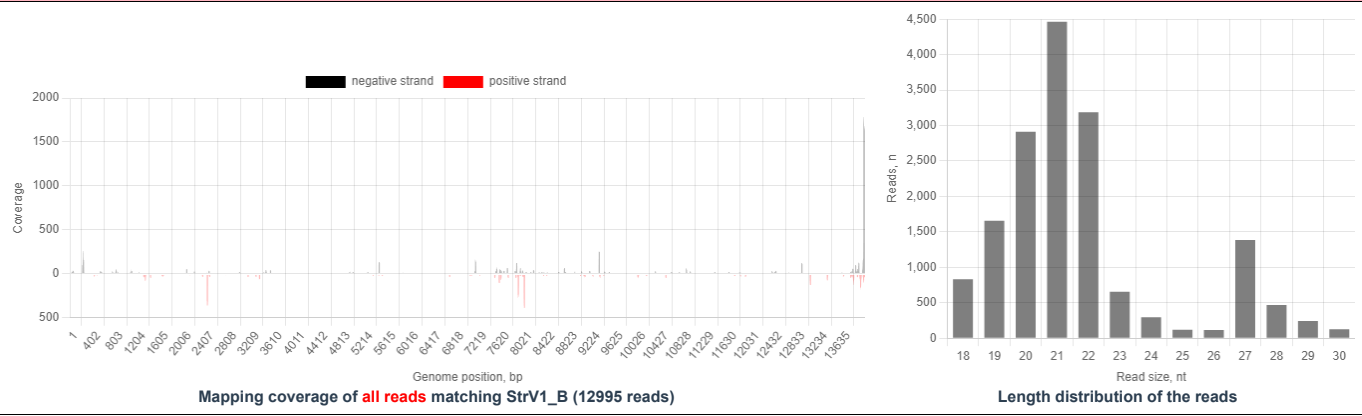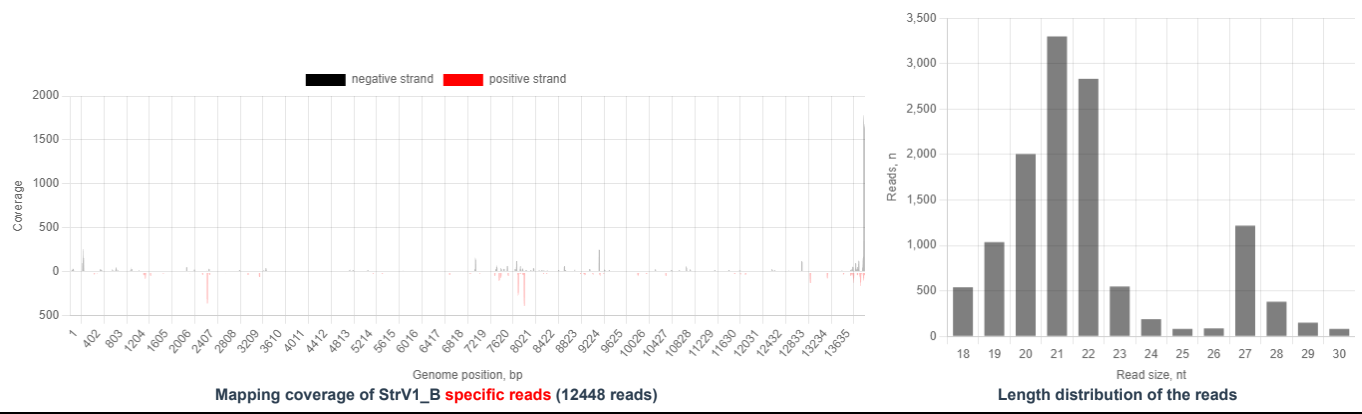

| Dataset | Input reads | Virus | Reference | Mapped reads | Mapped reads, % | RPKM | Forward/Reverse balance | Nonredundant, % | Strain specific | Strain specific, % from total mapped reads | Strain specific, RPKM |
|---------|-------------|-------|-----------|--------------|-----------------|------|-------------------------|-----------------|-----------------|--------------------------------------------|-----------------------|
| 2A_3    | 10000000    | StrV1 | StrV1_C   | 4232         | 0.042           | 29.7 | 1.1                     | 38.4            | 3458            | 81.7                                       | 20.1                  |

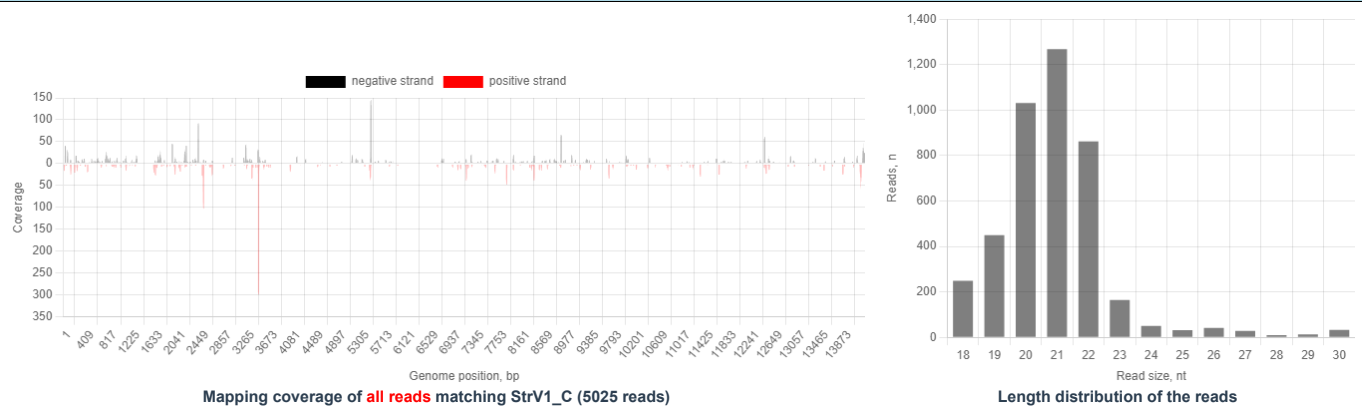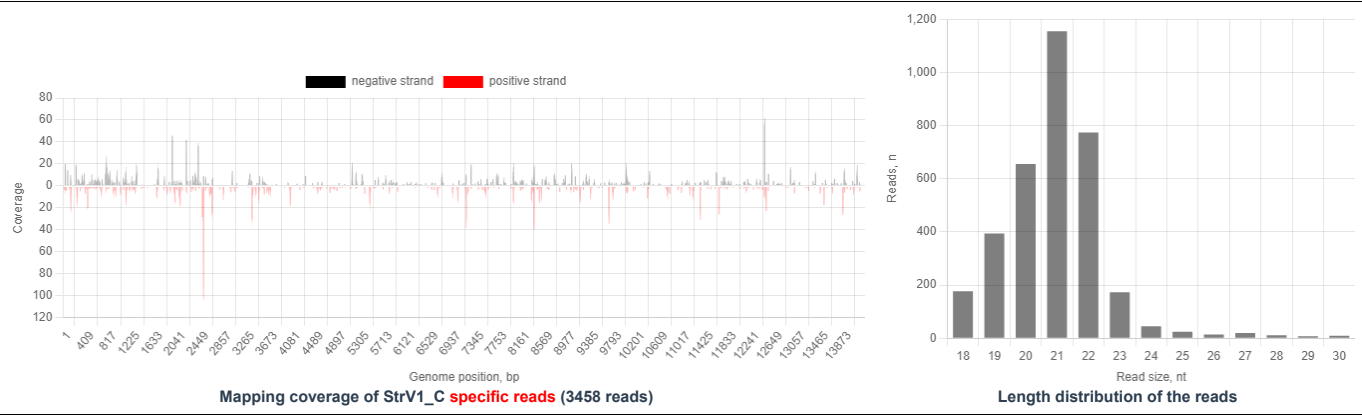

### Mappings of the 2A\_4 reads against the viral references.

| Dataset | Input reads | Virus | Reference | Mapped reads | Mapped reads, % | RPKM | Forward/Reverse balance | Nonredundant, % | Strain specific | Strain specific, % from total mapped reads | Strain specific, RPKM |
|---------|-------------|-------|-----------|--------------|-----------------|------|-------------------------|-----------------|-----------------|--------------------------------------------|-----------------------|
| 2A_4    | 10000000    | SCV   | SCV_A     | 5649         | 0.056           | 38.8 | 0.8                     | 32.4            | 11245           | 199.1                                      | 33.1                  |

| Dataset | Input reads | Virus | Reference | Mapped reads | Mapped reads, % | RPKM | Forward/Reverse balance | Nonredundant, % | Strain specific | Strain specific, % from total mapped reads | Strain specific, RPKM |
|---------|-------------|-------|-----------|--------------|-----------------|------|-------------------------|-----------------|-----------------|--------------------------------------------|-----------------------|
|---------|-------------|-------|-----------|--------------|-----------------|------|-------------------------|-----------------|-----------------|--------------------------------------------|-----------------------|

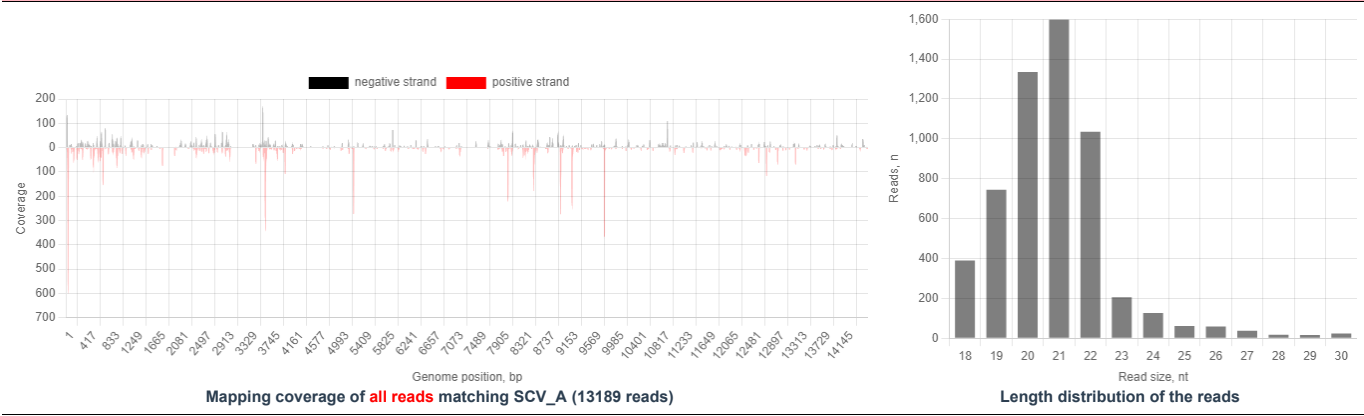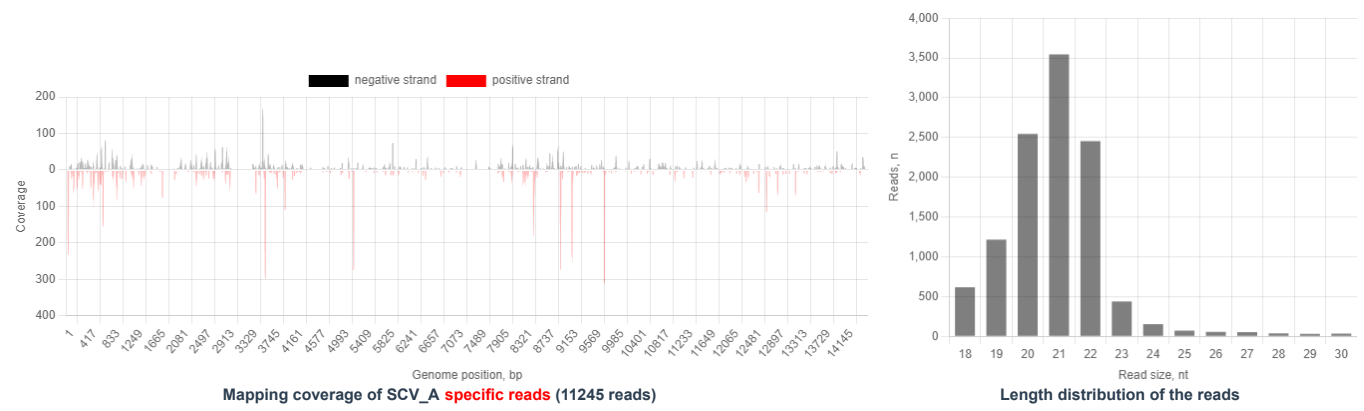

| Dataset | Input reads | Virus | Reference | Mapped reads | Mapped reads, % | RPKM | Forward/Reverse balance | Nonredundant, % | Strain specific | Strain specific, % from total mapped reads | Strain specific, RPKM |
|---------|-------------|-------|-----------|--------------|-----------------|------|-------------------------|-----------------|-----------------|--------------------------------------------|-----------------------|
| 2A_4    | 10000000    | SCV   | SCV_B     | 4337         | 0.043           | 29.8 | 0.8                     | 35.0            | 8870            | 204.5                                      | 24.1                  |

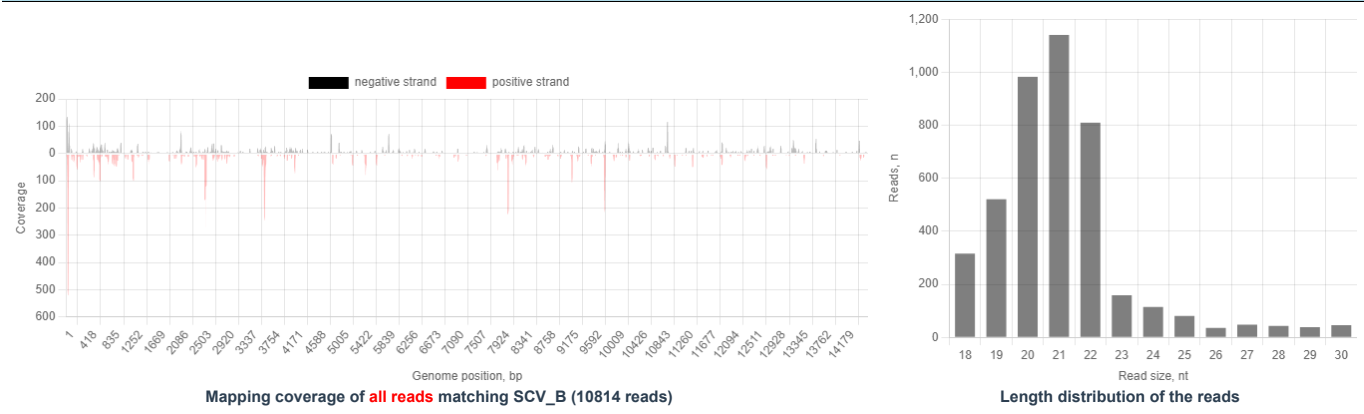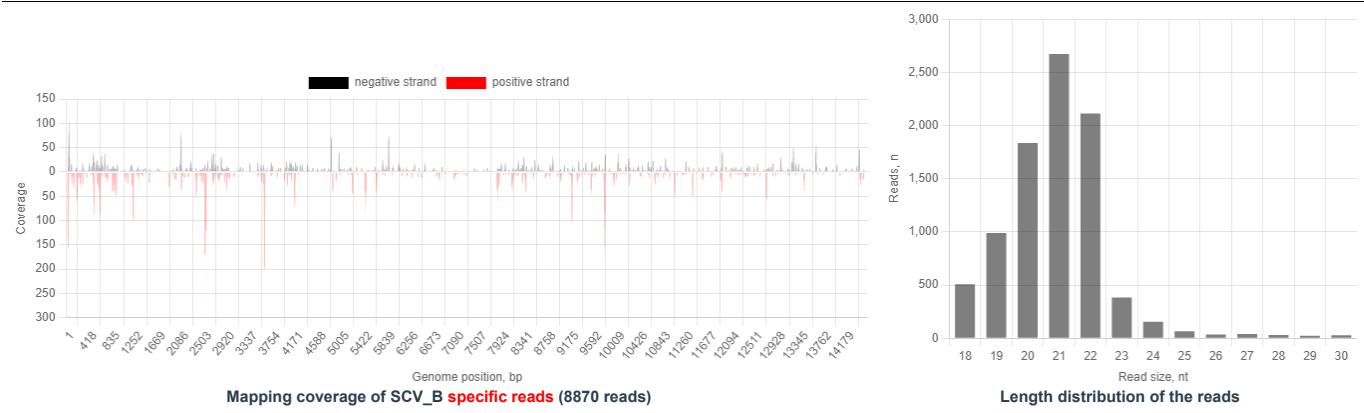

| Dataset | Input reads | Virus | Reference  | Mapped reads | Mapped reads, % | RPKM | Forward/Reverse balance | Nonredundant, % | Strain specific | Strain specific, % from total mapped reads | Strain specific, RPKM |
|---------|-------------|-------|------------|--------------|-----------------|------|-------------------------|-----------------|-----------------|--------------------------------------------|-----------------------|
| 2A_4    | 10000000    | SMoV  | SMoV_RNA1A | 6062         | 0.061           | 86.2 | 1.5                     | 28.3            | 4257            | 70.2                                       | 47.5                  |

| Dataset | Input reads | Virus | Reference | Mapped reads | Mapped reads, % | RPKM | Forward/Reverse balance | Nonredundant, % | Strain specific | Strain specific, % from total mapped reads | Strain specific, RPKM |
|---------|-------------|-------|-----------|--------------|-----------------|------|-------------------------|-----------------|-----------------|--------------------------------------------|-----------------------|
|---------|-------------|-------|-----------|--------------|-----------------|------|-------------------------|-----------------|-----------------|--------------------------------------------|-----------------------|

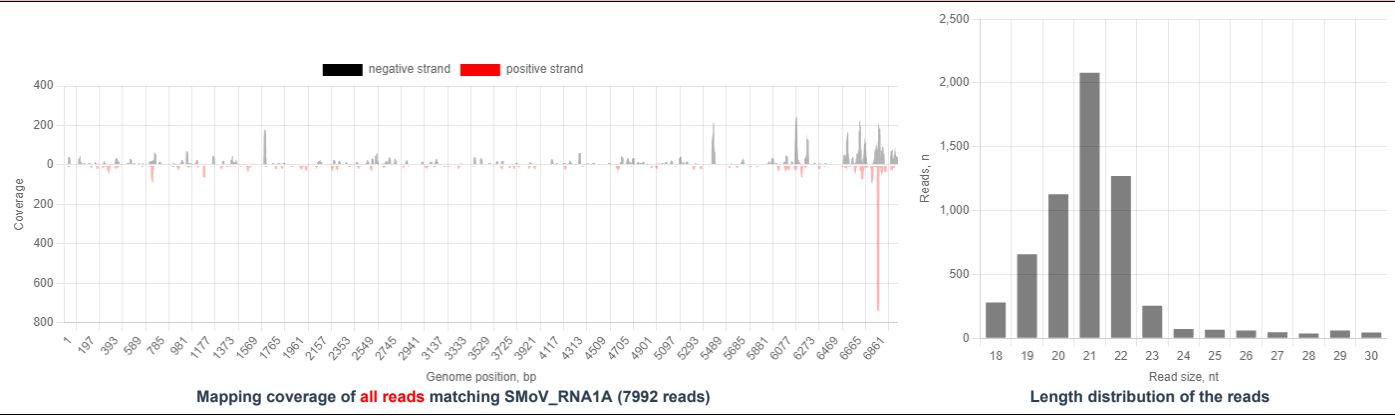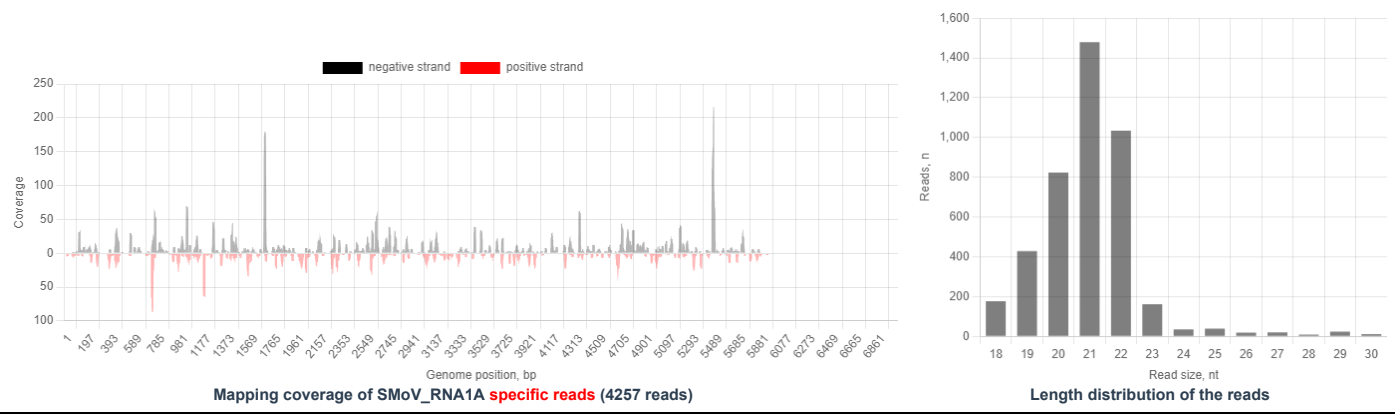

| Dataset | Input reads | Virus | Reference  | Mapped reads | Mapped reads, % | RPKM | Forward/Reverse balance | Nonredundant, % | Strain specific | Strain specific, % from total mapped reads | Strain specific, RPKM |
|---------|-------------|-------|------------|--------------|-----------------|------|-------------------------|-----------------|-----------------|--------------------------------------------|-----------------------|
| 2A_4    | 10000000    | SMoV  | SMoV_RNA1B | 5372         | 0.054           | 76.2 | 1.2                     | 29.5            | 3443            | 64.1                                       | 38.0                  |

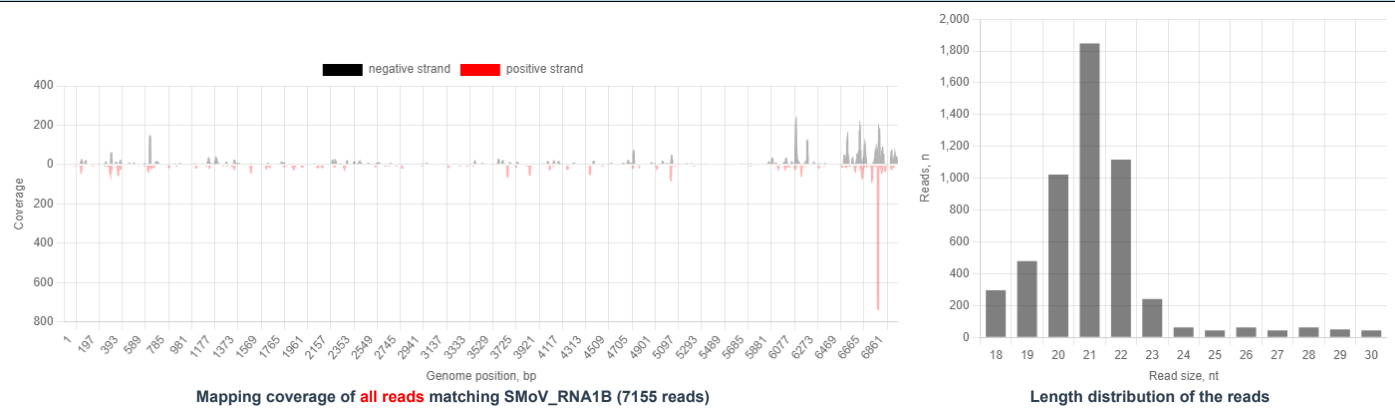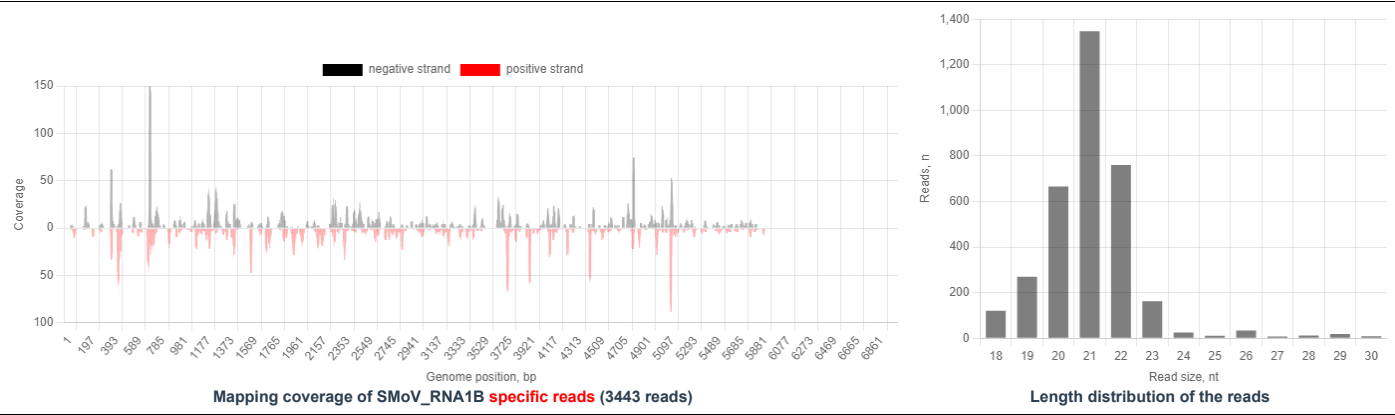

| Dataset | Input reads | Virus | Reference  | Mapped reads | Mapped reads, % | RPKM | Forward/Reverse balance | Nonredundant, % | Strain specific | Strain specific, % from total mapped reads | Strain specific, RPKM |
|---------|-------------|-------|------------|--------------|-----------------|------|-------------------------|-----------------|-----------------|--------------------------------------------|-----------------------|
| 2A_4    | 10000000    | SMoV  | SMoV_RNA1C | 5813         | 0.058           | 82.6 | 1.3                     | 29.1            | 4015            | 69.1                                       | 43.7                  |

| Dataset | Input reads | Virus | Reference | Mapped reads | Mapped reads, % | RPKM | Forward/Reverse balance | Nonredundant, % | Strain specific | Strain specific, % from total mapped reads | Strain specific, RPKM |
|---------|-------------|-------|-----------|--------------|-----------------|------|-------------------------|-----------------|-----------------|--------------------------------------------|-----------------------|
|---------|-------------|-------|-----------|--------------|-----------------|------|-------------------------|-----------------|-----------------|--------------------------------------------|-----------------------|

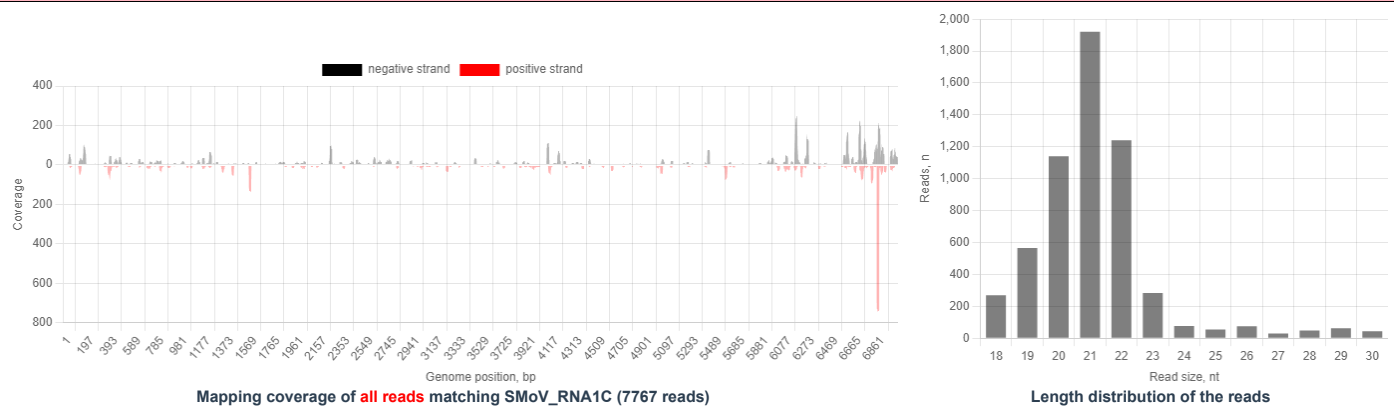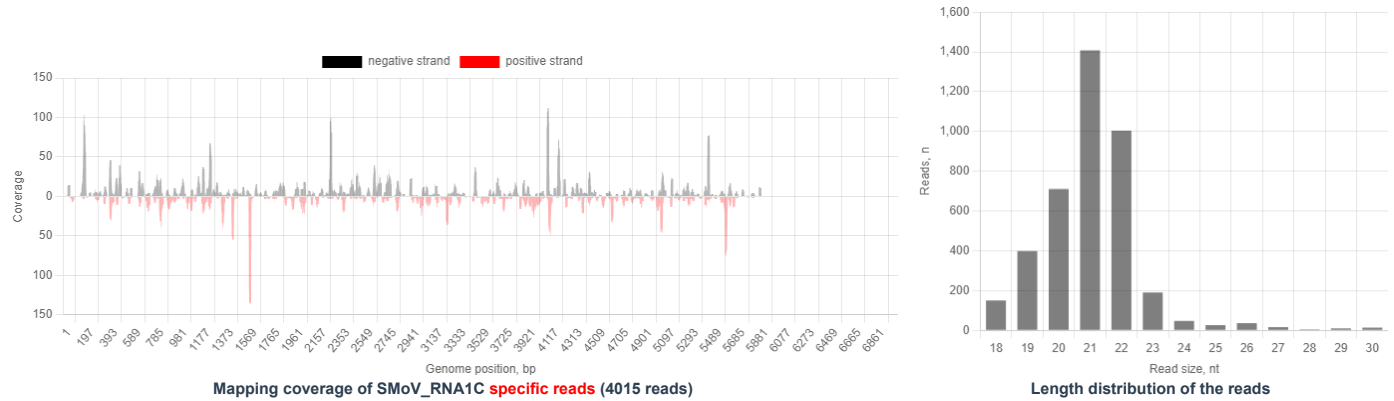

| Dataset | Input reads | Virus | Reference  | Mapped reads | Mapped reads, % | RPKM | Forward/Reverse balance | Nonredundant, % | Strain specific | Strain specific, % from total mapped reads | Strain specific, RPKM |
|---------|-------------|-------|------------|--------------|-----------------|------|-------------------------|-----------------|-----------------|--------------------------------------------|-----------------------|
| 2A_4    | 10000000    | SMoV  | SMoV_RNA2A | 3808         | 0.038           | 60.7 | 1.7                     | 30.6            | 3172            | 83.3                                       | 42.2                  |

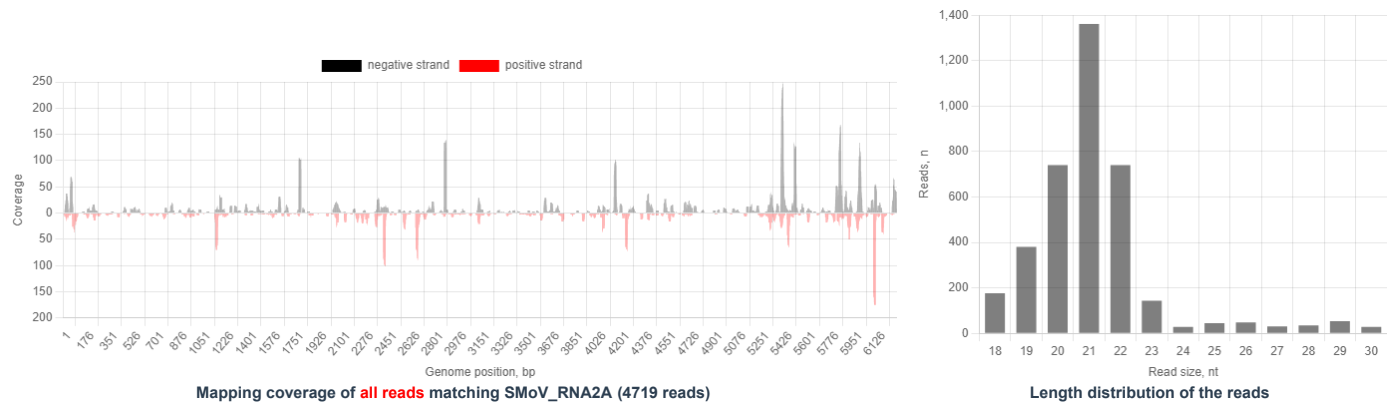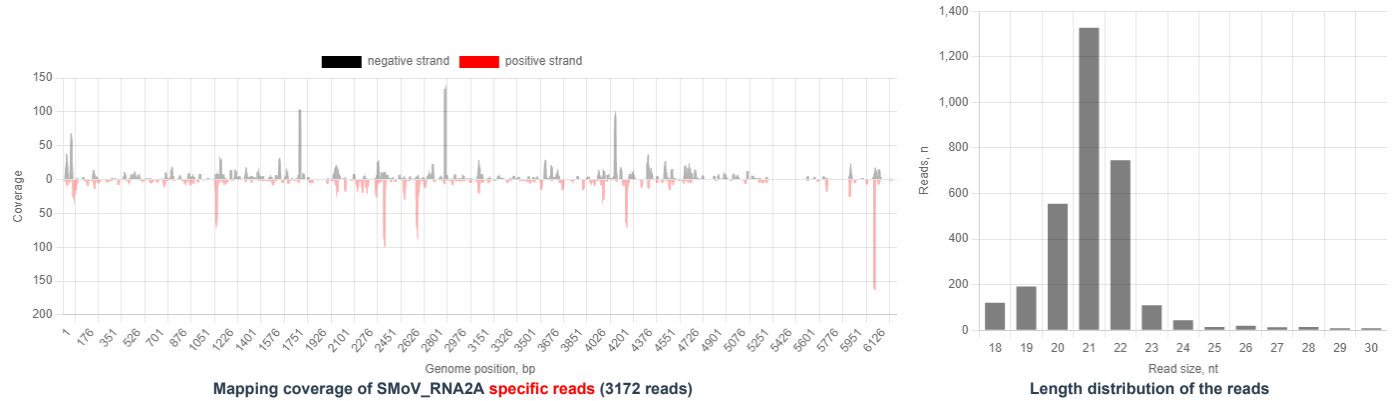

| Dataset | Input reads | Virus | Reference  | Mapped reads | Mapped reads, % | RPKM | Forward/Reverse balance | Nonredundant, % | Strain specific | Strain specific, % from total mapped reads | Strain specific, RPKM |
|---------|-------------|-------|------------|--------------|-----------------|------|-------------------------|-----------------|-----------------|--------------------------------------------|-----------------------|
| 2A_4    | 10000000    | SMoV  | SMoV_RNA2B | 3090         | 0.031           | 48.9 | 1.7                     | 33.5            | 2198            | 71.1                                       | 26.2                  |

| Dataset | Input reads | Virus | Reference | Mapped reads | Mapped reads, % | RPKM | Forward/Reverse balance | Nonredundant, % | Strain specific | Strain specific, % from total mapped reads | Strain specific, RPKM |
|---------|-------------|-------|-----------|--------------|-----------------|------|-------------------------|-----------------|-----------------|--------------------------------------------|-----------------------|
|---------|-------------|-------|-----------|--------------|-----------------|------|-------------------------|-----------------|-----------------|--------------------------------------------|-----------------------|

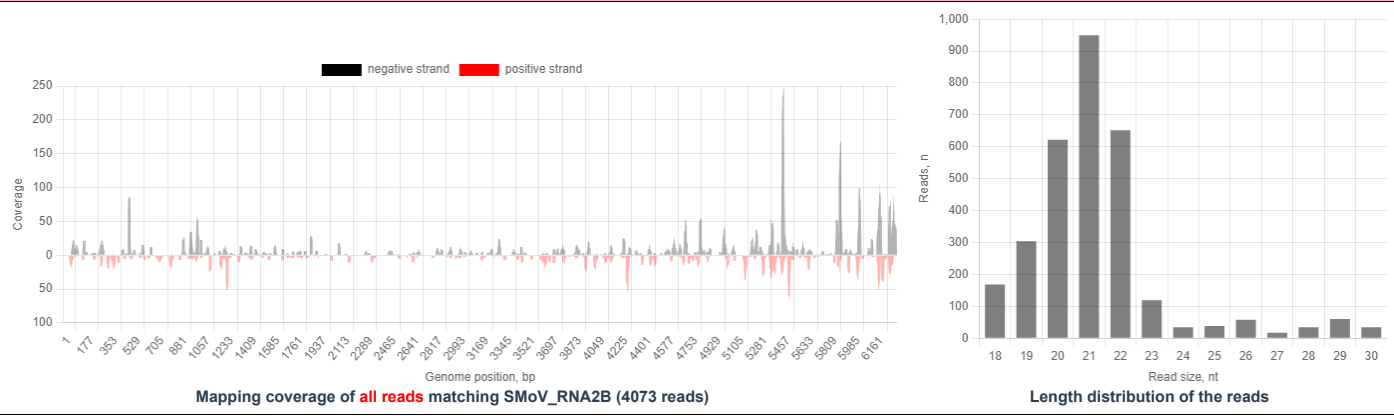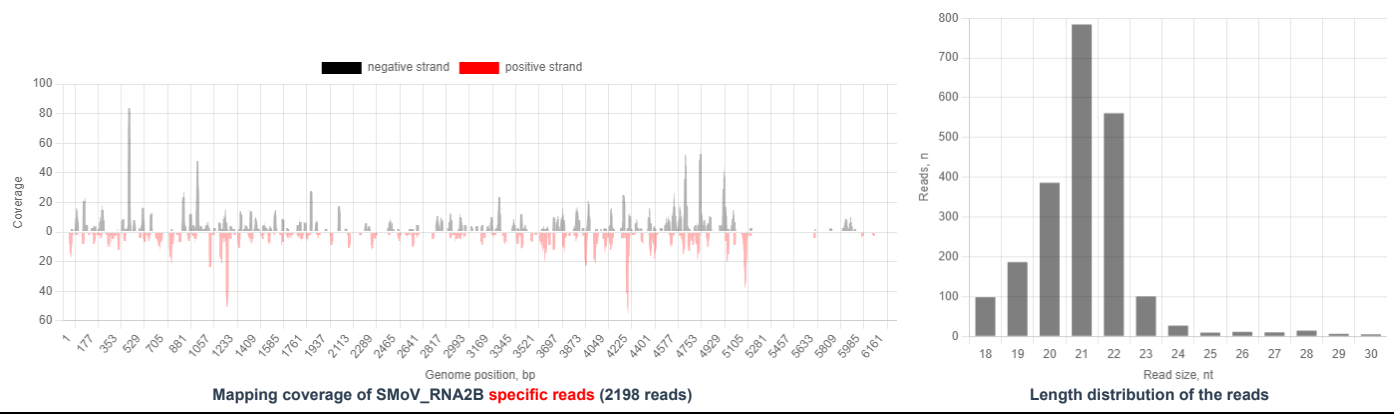

| Dataset | Input reads | Virus | Reference  | Mapped reads | Mapped reads, % | RPKM | Forward/Reverse balance | Nonredundant, % | Strain specific | Strain specific, % from total mapped reads | Strain specific, RPKM |
|---------|-------------|-------|------------|--------------|-----------------|------|-------------------------|-----------------|-----------------|--------------------------------------------|-----------------------|
| 2A_4    | 10000000    | SMoV  | SMoV_RNA2C | 4626         | 0.046           | 73.0 | 1.4                     | 28.0            | 2588            | 55.9                                       | 33.7                  |

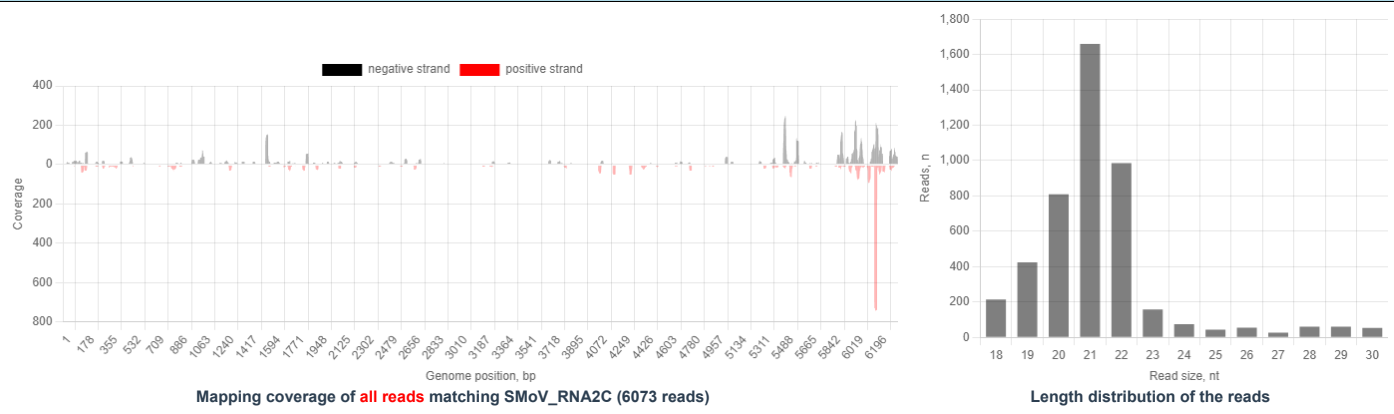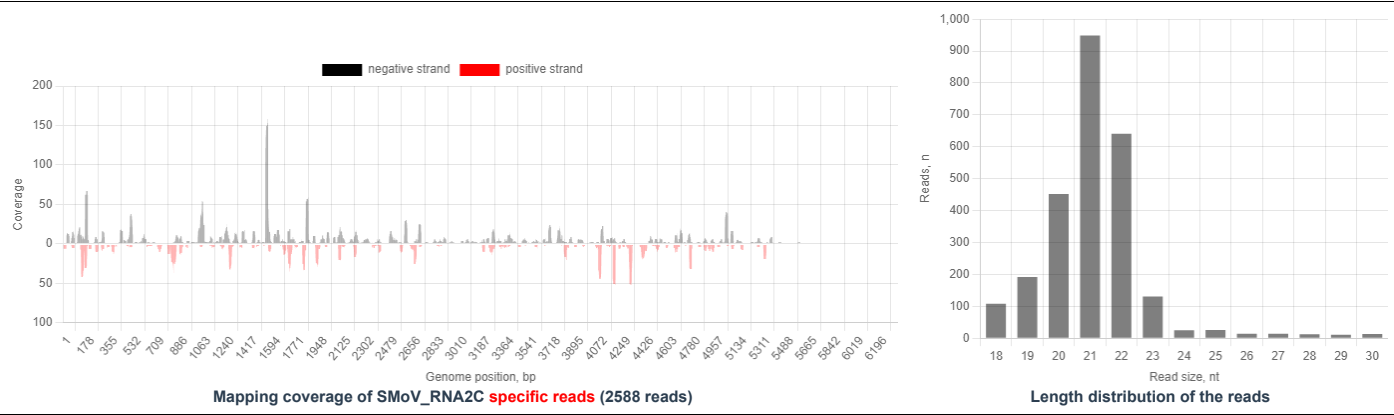

| Dataset | Input reads | Virus | Reference | Mapped reads | Mapped reads, % | RPKM | Forward/Reverse balance | Nonredundant, % | Strain specific | Strain specific, % from total mapped reads | Strain specific, RPKM |
|---------|-------------|-------|-----------|--------------|-----------------|------|-------------------------|-----------------|-----------------|--------------------------------------------|-----------------------|
| 2A_4    | 10000000    | StrV1 | StrV1_A   | 3009         | 0.030           | 21.2 | 0.8                     | 35.1            | 6044            | 200.9                                      | 17.4                  |

| Dataset | Input reads | Virus | Reference | Mapped reads | Mapped reads, % | RPKM | Forward/Reverse balance | Nonredundant, % | Strain specific | Strain specific, % from total mapped reads | Strain specific, RPKM |
|---------|-------------|-------|-----------|--------------|-----------------|------|-------------------------|-----------------|-----------------|--------------------------------------------|-----------------------|
|---------|-------------|-------|-----------|--------------|-----------------|------|-------------------------|-----------------|-----------------|--------------------------------------------|-----------------------|

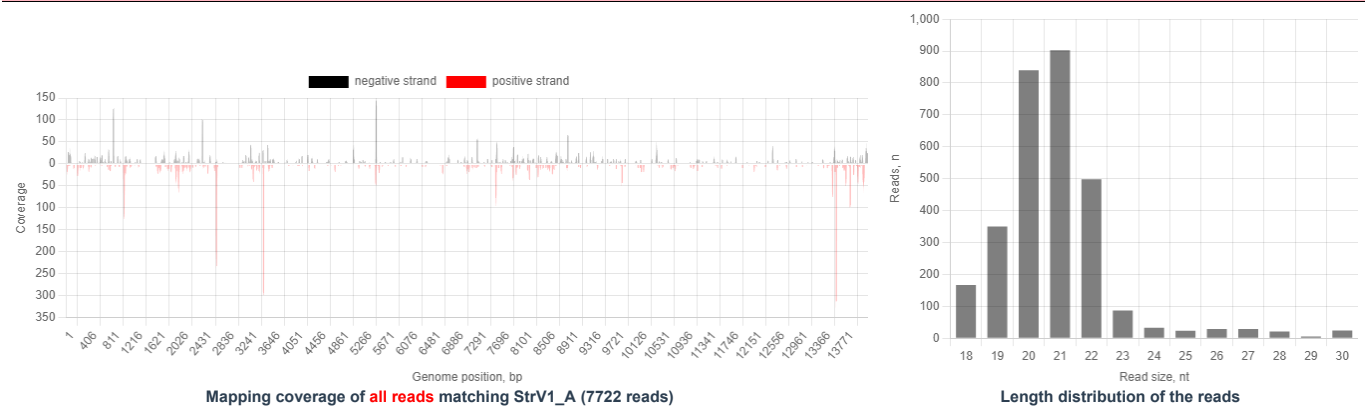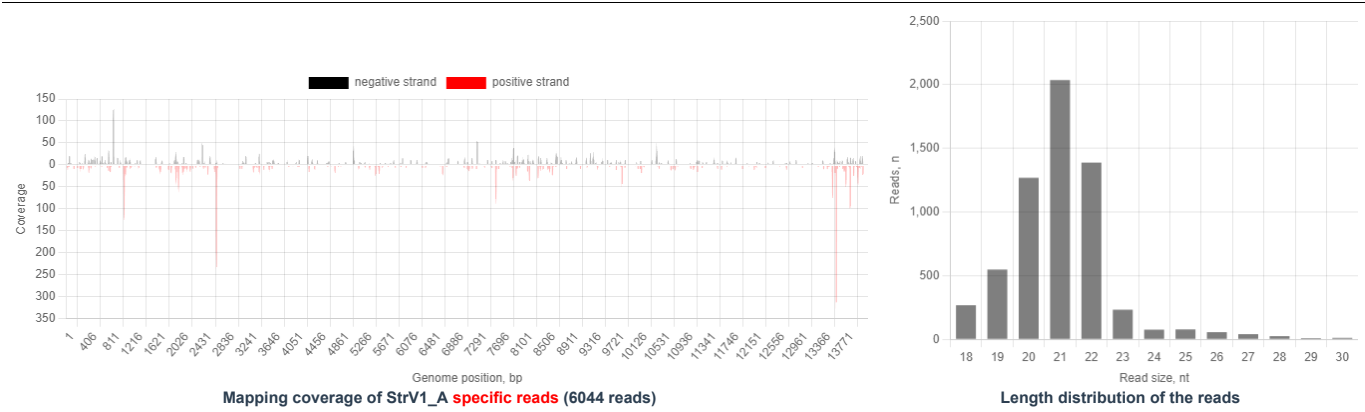

| Dataset | Input reads | Virus | Reference | Mapped reads | Mapped reads, % | RPKM | Forward/Reverse balance | Nonredundant, % | Strain specific | Strain specific, % from total mapped reads | Strain specific, RPKM |
|---------|-------------|-------|-----------|--------------|-----------------|------|-------------------------|-----------------|-----------------|--------------------------------------------|-----------------------|
| 2A_4    | 10000000    | StrV1 | StrV1_B   | 8341         | 0.083           | 59.5 | 1.6                     | 25.7            | 12448           | 149.2                                      | 58.2                  |

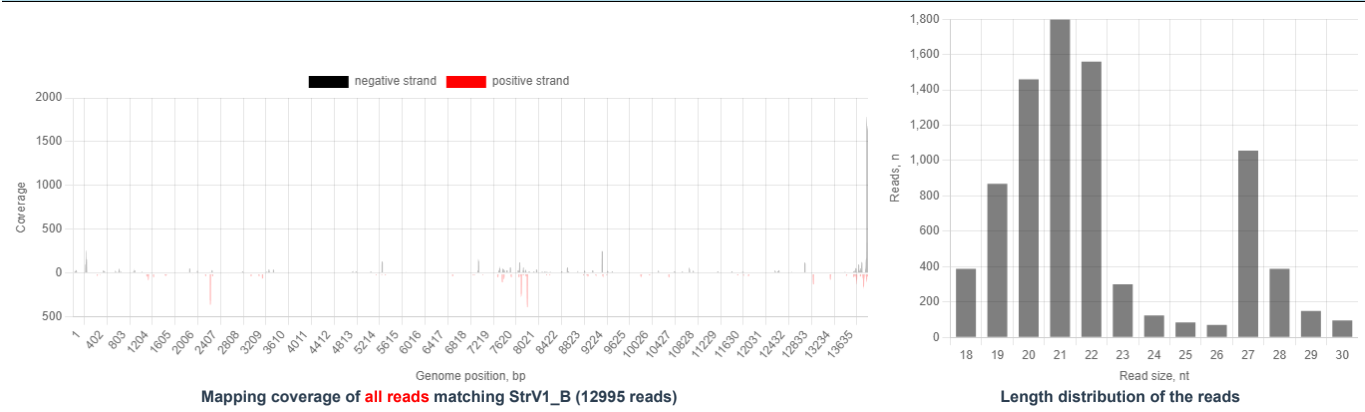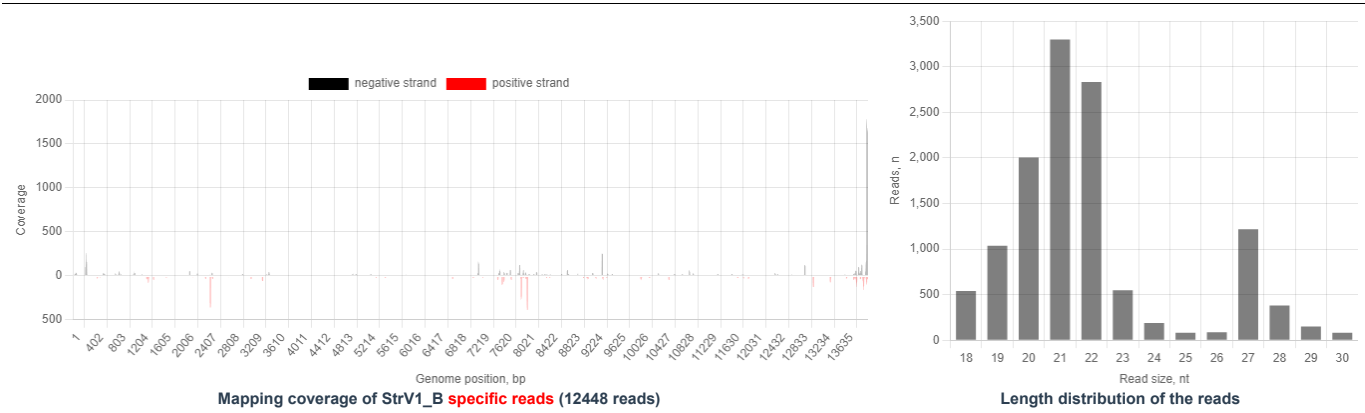

| Dataset | Input reads | Virus | Reference | Mapped reads | Mapped reads, % | RPKM | Forward/Reverse balance | Nonredundant, % | Strain specific | Strain specific, % from total mapped reads | Strain specific, RPKM |
|---------|-------------|-------|-----------|--------------|-----------------|------|-------------------------|-----------------|-----------------|--------------------------------------------|-----------------------|
| 2A_4    | 10000000    | StrV1 | StrV1_C   | 1428         | 0.014           | 10.0 | 1.0                     | 36.4            | 3458            | 242.2                                      | 6.4                   |

| Dataset | Input reads | Virus | Reference | Mapped reads | Mapped reads, % | RPKM | Forward/Reverse balance | Nonredundant, % | Strain specific | Strain specific, % from total mapped reads | Strain specific, RPKM |
|---------|-------------|-------|-----------|--------------|-----------------|------|-------------------------|-----------------|-----------------|--------------------------------------------|-----------------------|
|---------|-------------|-------|-----------|--------------|-----------------|------|-------------------------|-----------------|-----------------|--------------------------------------------|-----------------------|

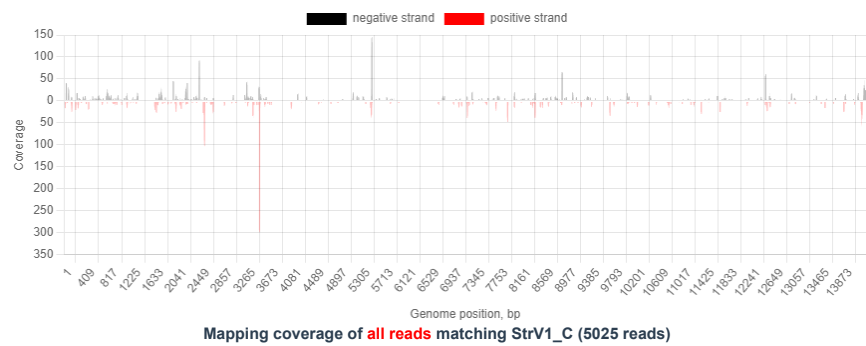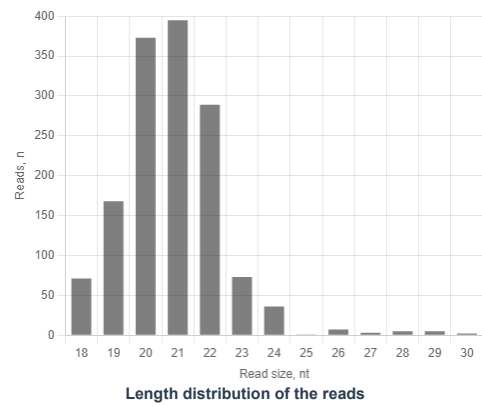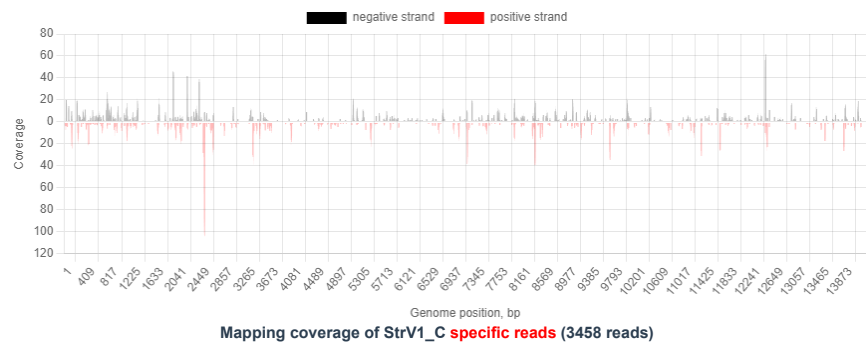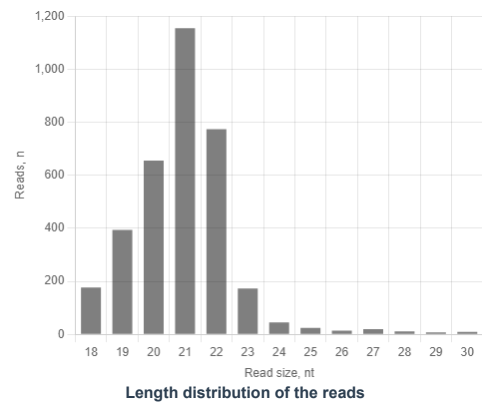

Mappings of the 3K\_1 reads against the viral references.

| Dataset | Input reads | Virus | Reference | Mapped reads | Mapped reads, % | RPKM | Forward/Reverse balance | Nonredundant, % | Strain specific | Strain specific, % from total mapped reads | Strain specific, RPKM |
|---------|-------------|-------|-----------|--------------|-----------------|------|-------------------------|-----------------|-----------------|--------------------------------------------|-----------------------|
| 3K_1    | 10000000    | SCV   | SCV_A     | 9737         | 0.097           | 66.9 | 0.8                     | 56.6            | 8443            | 86.7                                       | 58.0                  |

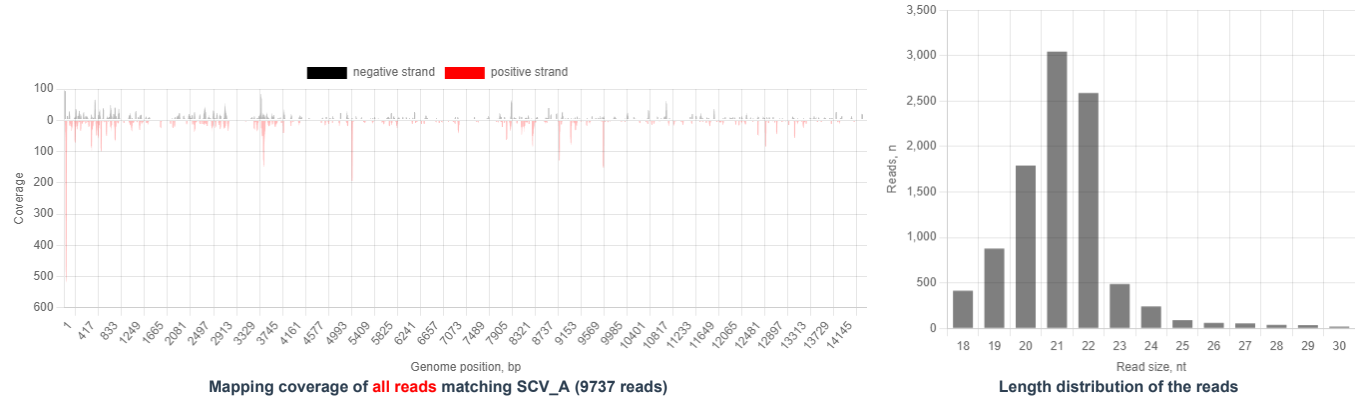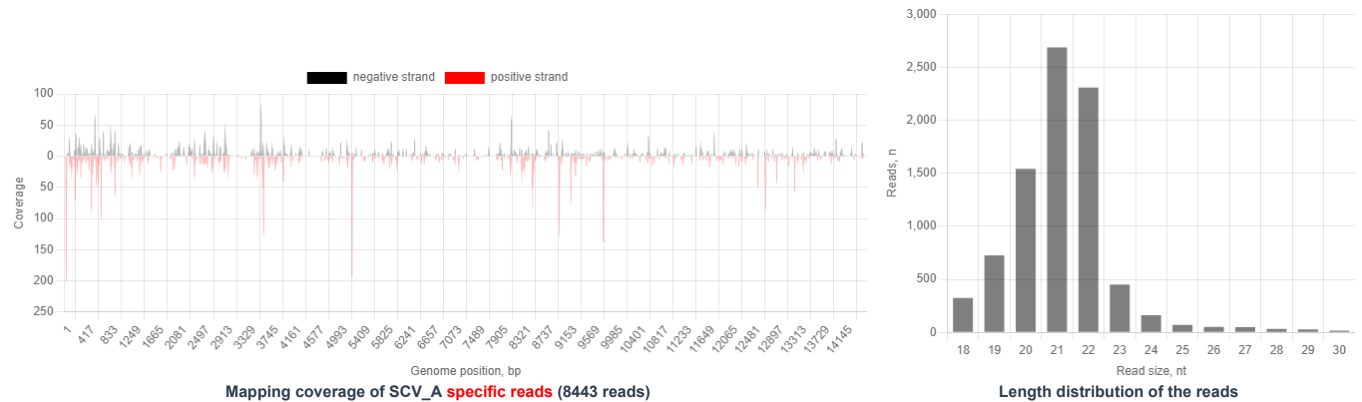

| Dataset | Input reads | Virus | Reference | Mapped reads | Mapped reads, % | RPKM | Forward/Reverse balance | Nonredundant, % | Strain specific | Strain specific, % from total mapped reads | Strain specific, RPKM |
|---------|-------------|-------|-----------|--------------|-----------------|------|-------------------------|-----------------|-----------------|--------------------------------------------|-----------------------|
| 3K_1    | 10000000    | SCV   | SCV_B     | 6588         | 0.066           | 45.2 | 0.7                     | 60.1            | 5294            | 80.4                                       | 36.4                  |

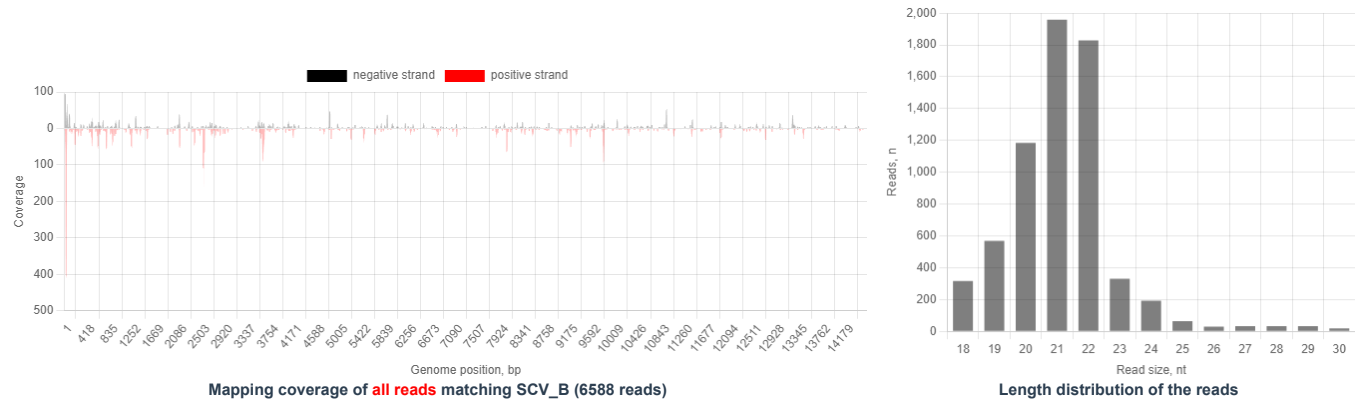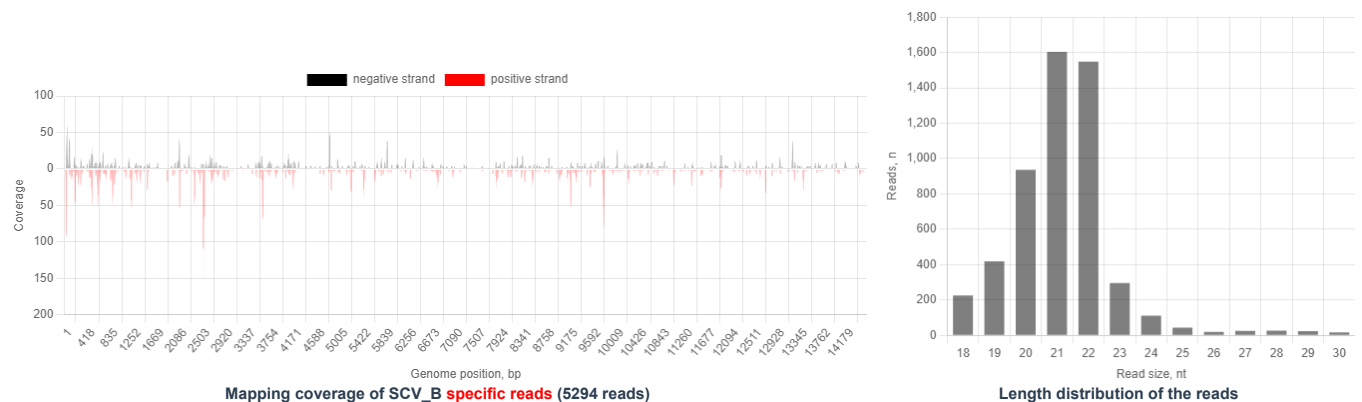

| Dataset | Input reads | Virus | Reference  | Mapped reads | Mapped reads, % | RPKM  | Forward/Reverse balance | Nonredundant, % | Strain specific | Strain specific, % from total mapped reads | Strain specific, RPKM |
|---------|-------------|-------|------------|--------------|-----------------|-------|-------------------------|-----------------|-----------------|--------------------------------------------|-----------------------|
| 3K_1    | 10000000    | SMoV  | SMoV_RNA1A | 8455         | 0.085           | 120.2 | 1.5                     | 50.1            | 4731            | 56.0                                       | 67.2                  |



| Dataset | Input reads | Virus | Reference | Mapped reads | Mapped reads, % | RPKM | Forward/Reverse balance | Nonredundant, % | Strain specific | Strain specific, % from total mapped reads | Strain specific, RPKM |
|---------|-------------|-------|-----------|--------------|-----------------|------|-------------------------|-----------------|-----------------|--------------------------------------------|-----------------------|
|---------|-------------|-------|-----------|--------------|-----------------|------|-------------------------|-----------------|-----------------|--------------------------------------------|-----------------------|

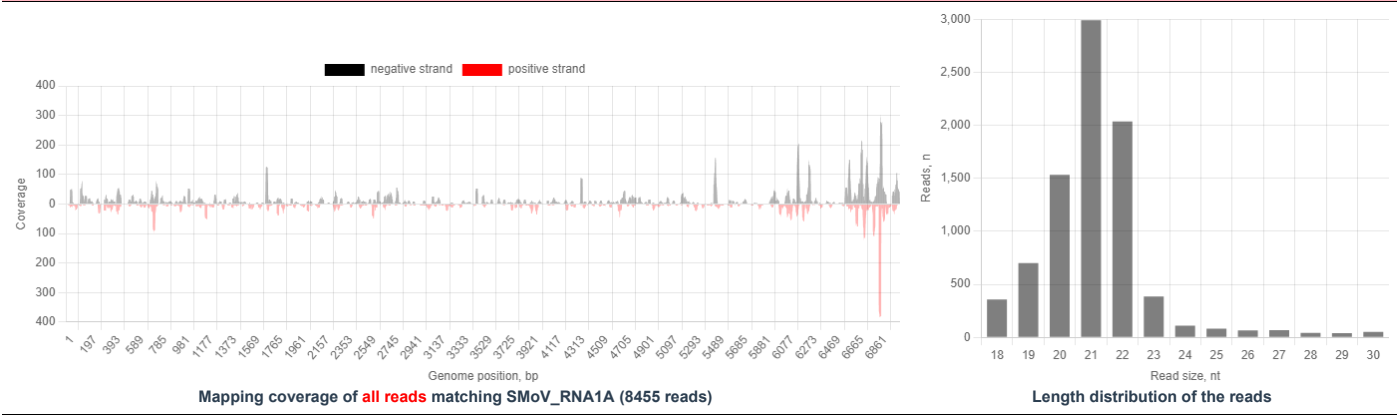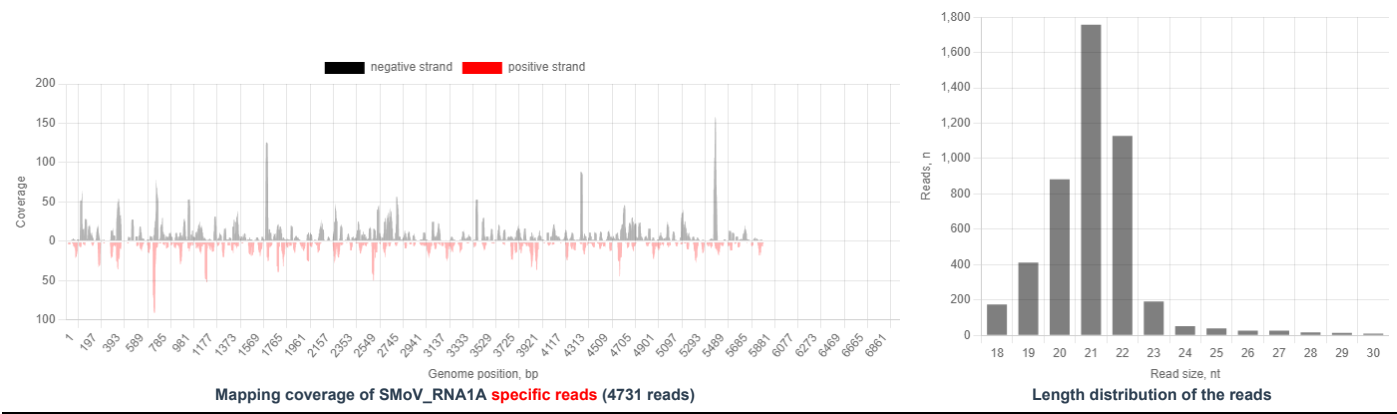

| Dataset | Input reads | Virus | Reference  | Mapped reads | Mapped reads, % | RPKM  | Forward/Reverse balance | Nonredundant, % | Strain specific | Strain specific, % from total mapped reads | Strain specific, RPKM |
|---------|-------------|-------|------------|--------------|-----------------|-------|-------------------------|-----------------|-----------------|--------------------------------------------|-----------------------|
| 3K_1    | 10000000    | SMoV  | SMoV_RNA1B | 7511         | 0.075           | 106.5 | 1.3                     | 49.5            | 3850            | 51.3                                       | 54.6                  |

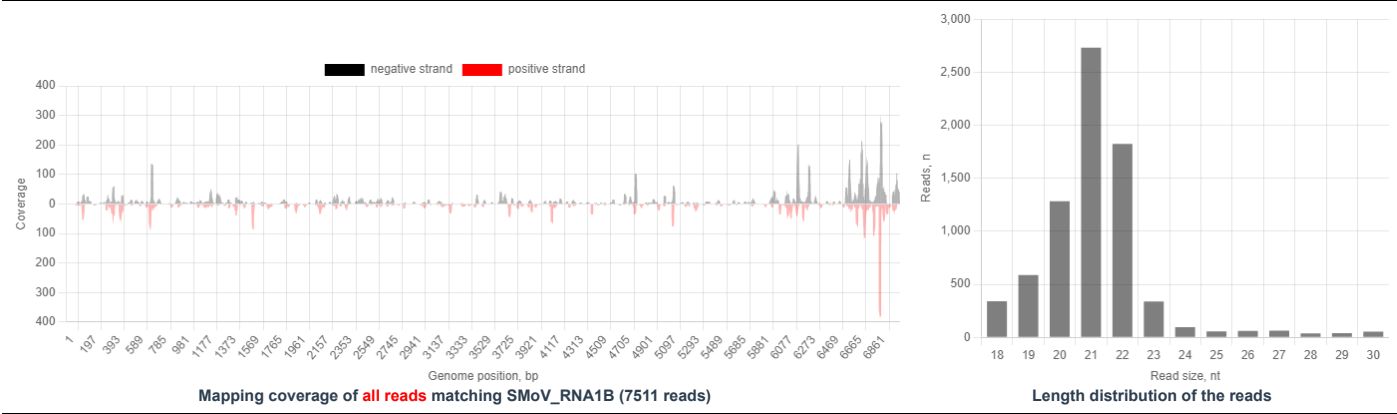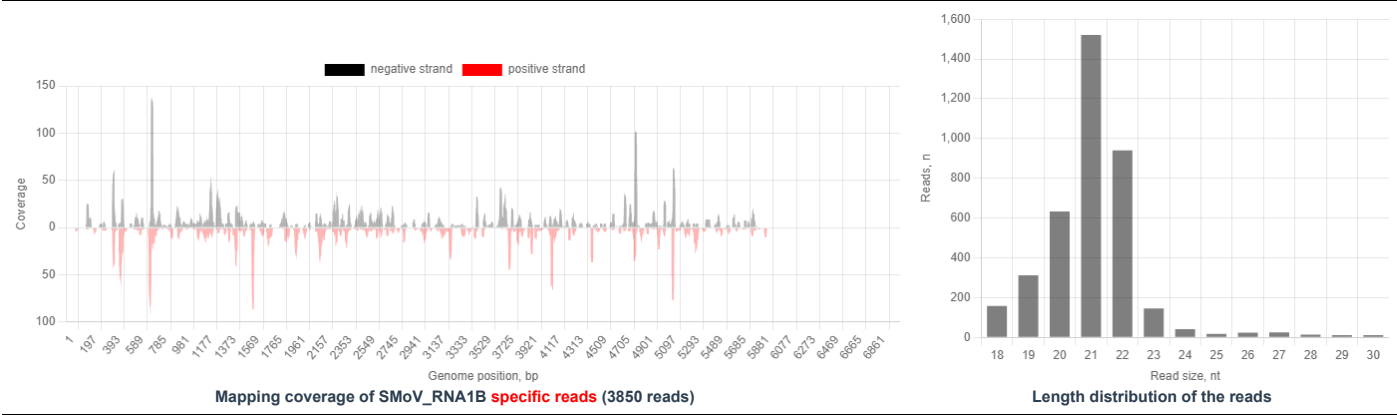

| Dataset | Input reads | Virus | Reference  | Mapped reads | Mapped reads, % | RPKM  | Forward/Reverse balance | Nonredundant, % | Strain specific | Strain specific, % from total mapped reads | Strain specific, RPKM |
|---------|-------------|-------|------------|--------------|-----------------|-------|-------------------------|-----------------|-----------------|--------------------------------------------|-----------------------|
| 3K_1    | 10000000    | SMoV  | SMoV_RNA1C | 8226         | 0.082           | 116.8 | 1.4                     | 49.2            | 4522            | 55.0                                       | 64.2                  |

| Dataset | Input reads | Virus | Reference | Mapped reads | Mapped reads, % | RPKM | Forward/Reverse balance | Nonredundant, % | Strain specific | Strain specific, % from total mapped reads | Strain specific, RPKM |
|---------|-------------|-------|-----------|--------------|-----------------|------|-------------------------|-----------------|-----------------|--------------------------------------------|-----------------------|
|---------|-------------|-------|-----------|--------------|-----------------|------|-------------------------|-----------------|-----------------|--------------------------------------------|-----------------------|

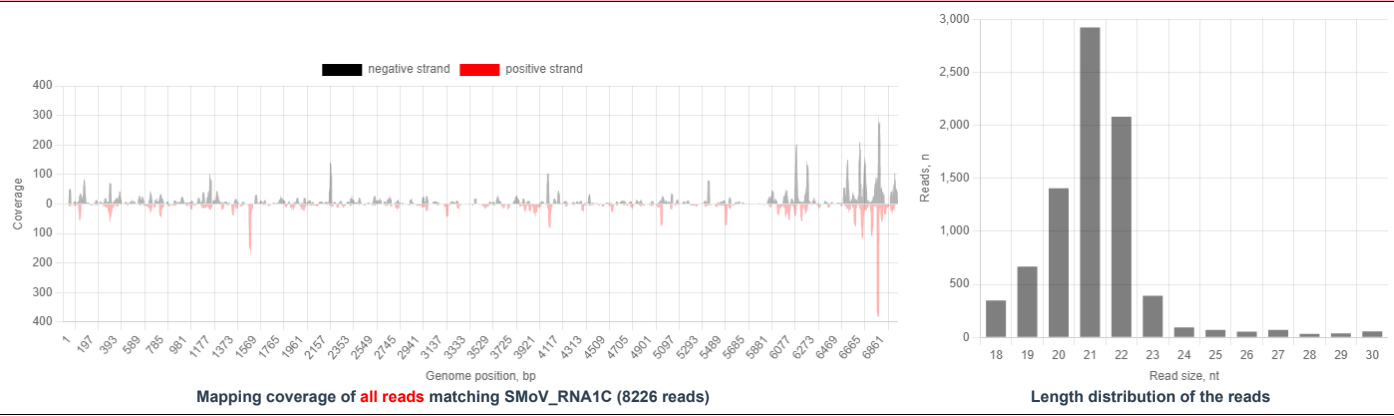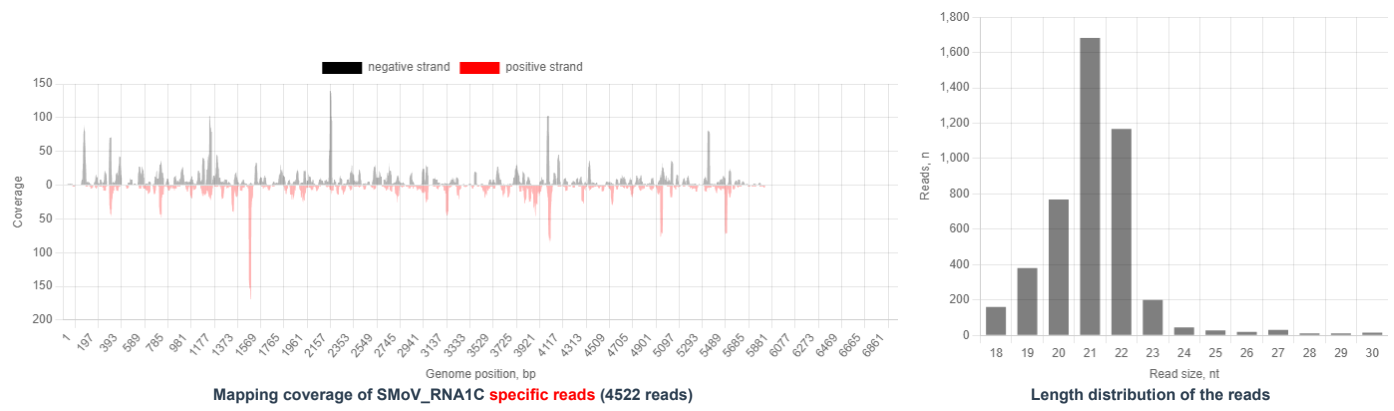

| Dataset | Input reads | Virus | Reference  | Mapped reads | Mapped reads, % | RPKM | Forward/Reverse balance | Nonredundant, % | Strain specific | Strain specific, % from total mapped reads | Strain specific, RPKM |
|---------|-------------|-------|------------|--------------|-----------------|------|-------------------------|-----------------|-----------------|--------------------------------------------|-----------------------|
| 3K_1    | 10000000    | SMoV  | SMoV_RNA2A | 5328         | 0.053           | 84.9 | 1.4                     | 54.6            | 3543            | 66.5                                       | 56.5                  |

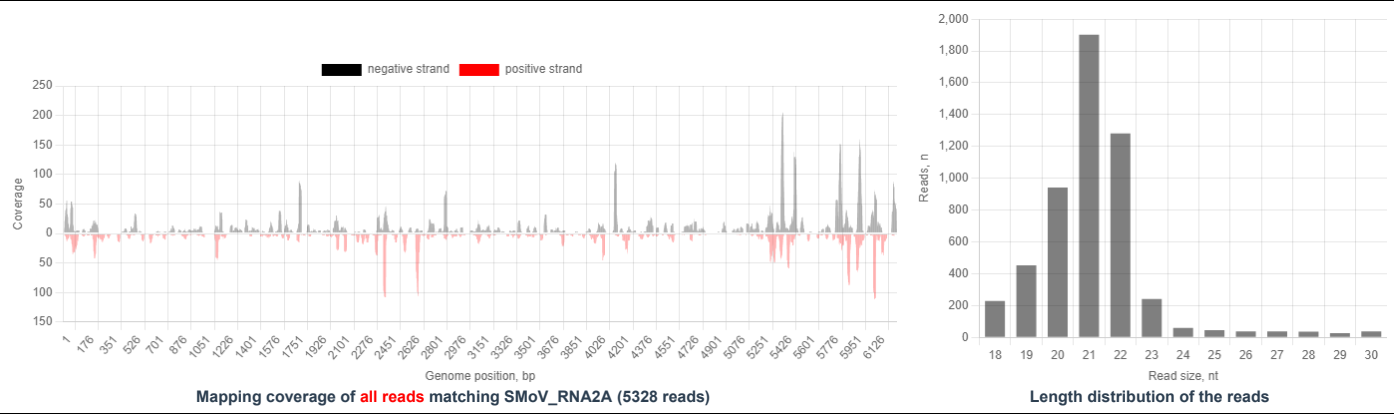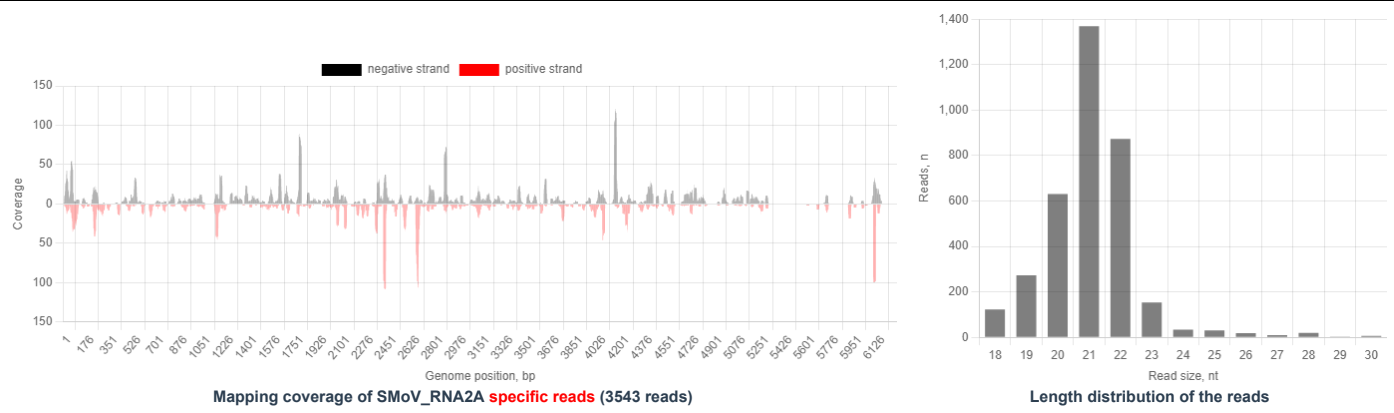

| Dataset | Input reads | Virus | Reference  | Mapped reads | Mapped reads, % | RPKM | Forward/Reverse balance | Nonredundant, % | Strain specific | Strain specific, % from total mapped reads | Strain specific, RPKM |
|---------|-------------|-------|------------|--------------|-----------------|------|-------------------------|-----------------|-----------------|--------------------------------------------|-----------------------|
| 3K_1    | 10000000    | SMoV  | SMoV_RNA2B | 4406         | 0.044           | 69.7 | 1.4                     | 58.6            | 2383            | 54.1                                       | 37.7                  |

| Dataset | Input reads | Virus | Reference | Mapped reads | Mapped reads, % | RPKM | Forward/Reverse balance | Nonredundant, % | Strain specific | Strain specific, % from total mapped reads | Strain specific, RPKM |
|---------|-------------|-------|-----------|--------------|-----------------|------|-------------------------|-----------------|-----------------|--------------------------------------------|-----------------------|
|---------|-------------|-------|-----------|--------------|-----------------|------|-------------------------|-----------------|-----------------|--------------------------------------------|-----------------------|

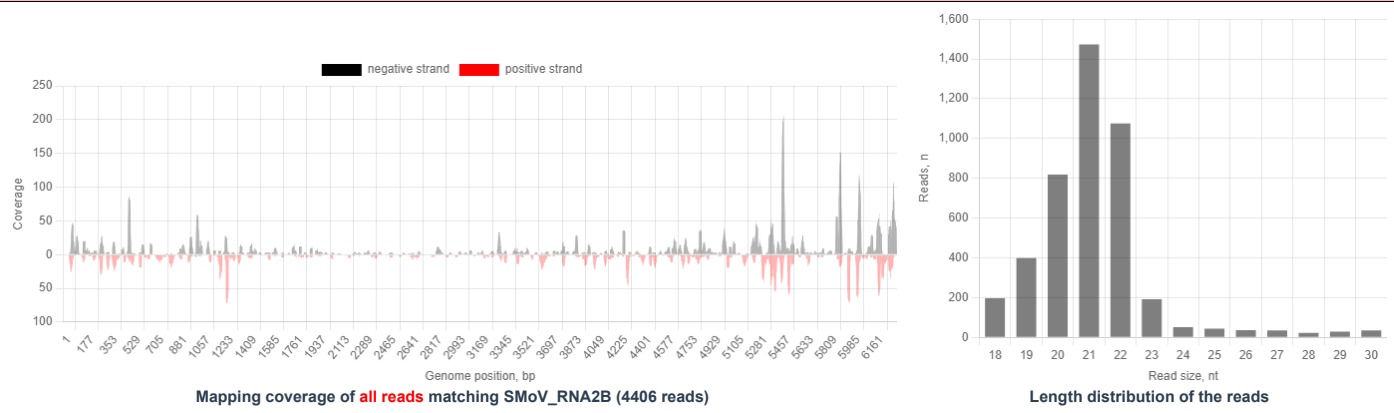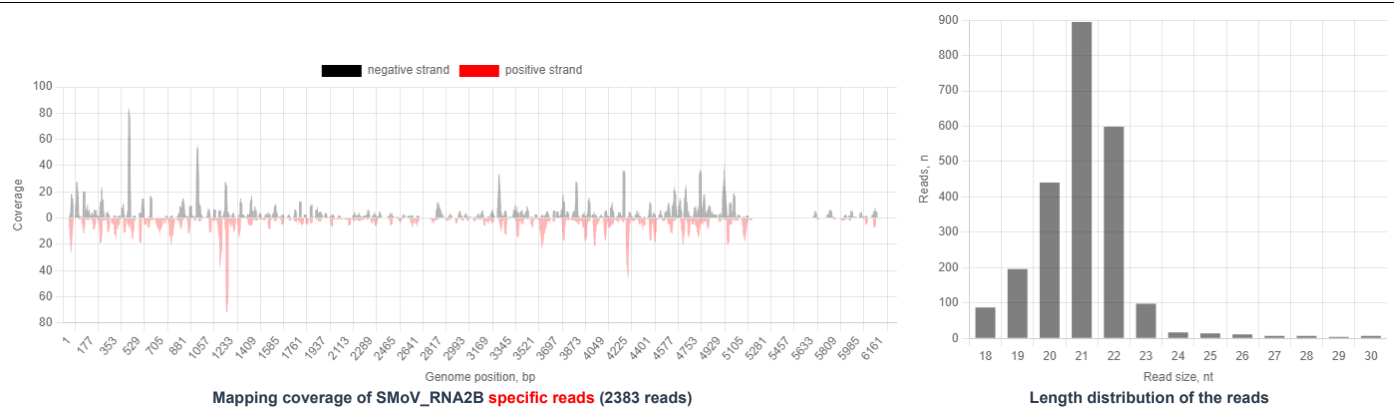

| Dataset | Input reads | Virus | Reference  | Mapped reads | Mapped reads, % | RPKM | Forward/Reverse balance | Nonredundant, % | Strain specific | Strain specific, % from total mapped reads | Strain specific, RPKM |
|---------|-------------|-------|------------|--------------|-----------------|------|-------------------------|-----------------|-----------------|--------------------------------------------|-----------------------|
| 3K_1    | 10000000    | SMoV  | SMoV_RNA2C | 6056         | 0.061           | 95.6 | 1.3                     | 48.5            | 2702            | 44.6                                       | 42.6                  |

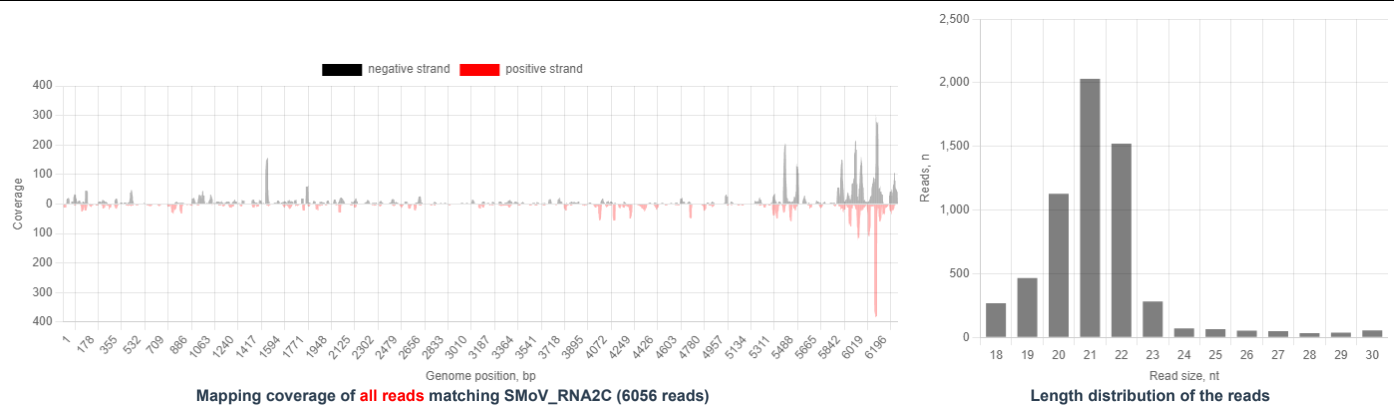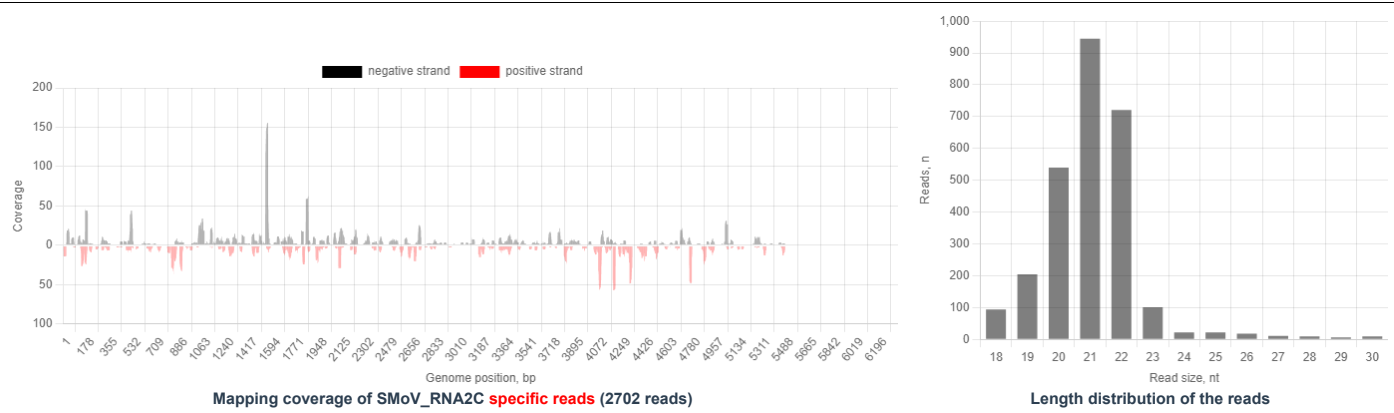

| Dataset | Input reads | Virus | Reference | Mapped reads | Mapped reads, % | RPKM | Forward/Reverse balance | Nonredundant, % | Strain specific | Strain specific, % from total mapped reads | Strain specific, RPKM |
|---------|-------------|-------|-----------|--------------|-----------------|------|-------------------------|-----------------|-----------------|--------------------------------------------|-----------------------|
| 3K_1    | 10000000    | StrV1 | StrV1_A   | 2859         | 0.029           | 20.2 | 0.9                     | 67.8            | 2149            | 75.2                                       | 15.2                  |

| Dataset | Input reads | Virus | Reference | Mapped reads | Mapped reads, % | RPKM | Forward/Reverse balance | Nonredundant, % | Strain specific | Strain specific, % from total mapped reads | Strain specific, RPKM |
|---------|-------------|-------|-----------|--------------|-----------------|------|-------------------------|-----------------|-----------------|--------------------------------------------|-----------------------|
|---------|-------------|-------|-----------|--------------|-----------------|------|-------------------------|-----------------|-----------------|--------------------------------------------|-----------------------|

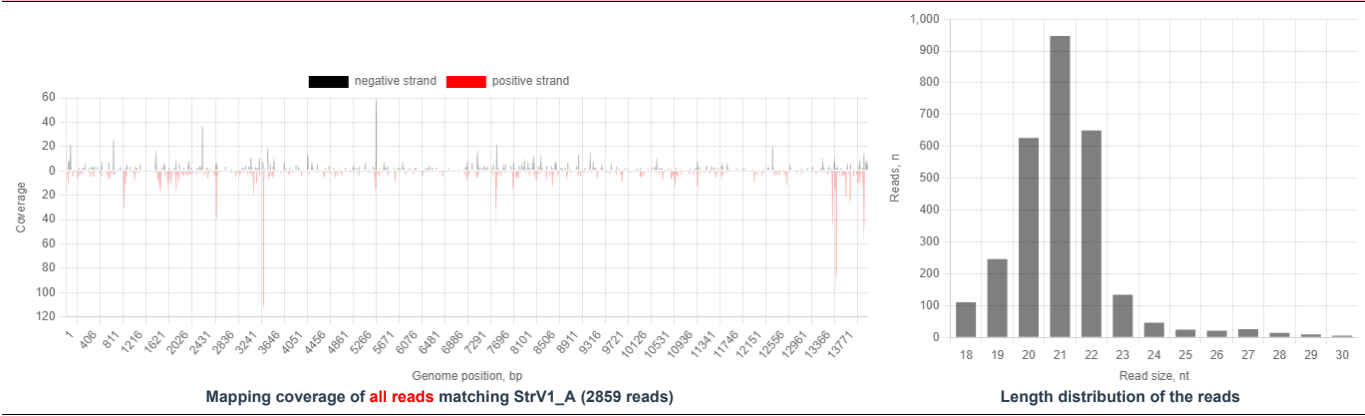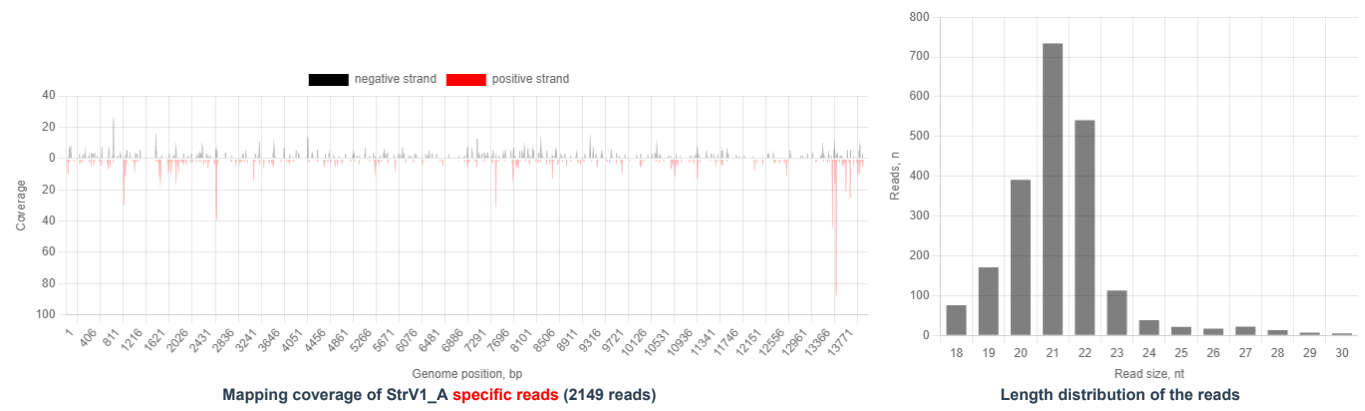

| Dataset | Input reads | Virus | Reference | Mapped reads | Mapped reads, % | RPKM | Forward/Reverse balance | Nonredundant, % | Strain specific | Strain specific, % from total mapped reads | Strain specific, RPKM |
|---------|-------------|-------|-----------|--------------|-----------------|------|-------------------------|-----------------|-----------------|--------------------------------------------|-----------------------|
| 3K_1    | 10000000    | StrV1 | StrV1_B   | 7267         | 0.073           | 51.8 | 1.3                     | 40.1            | 6971            | 95.9                                       | 49.7                  |

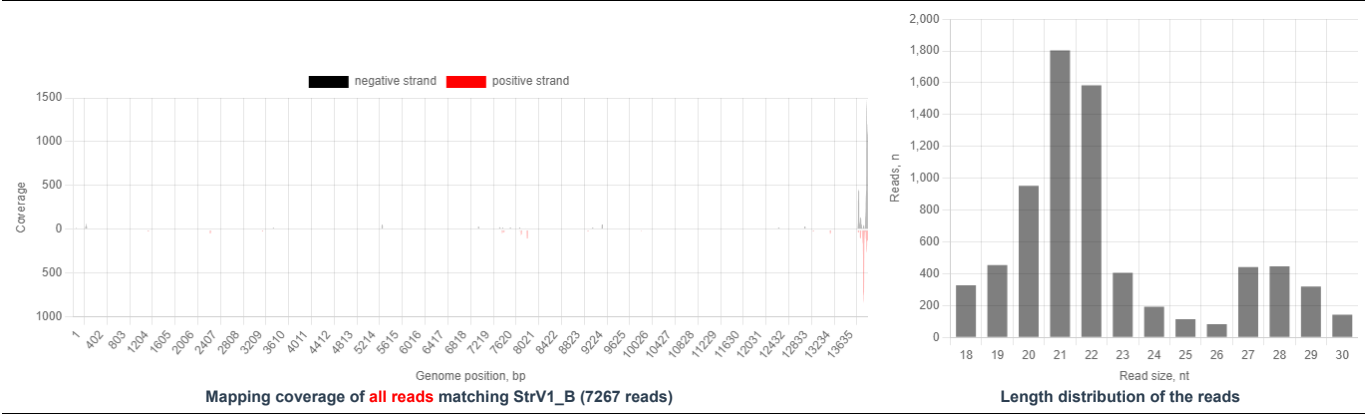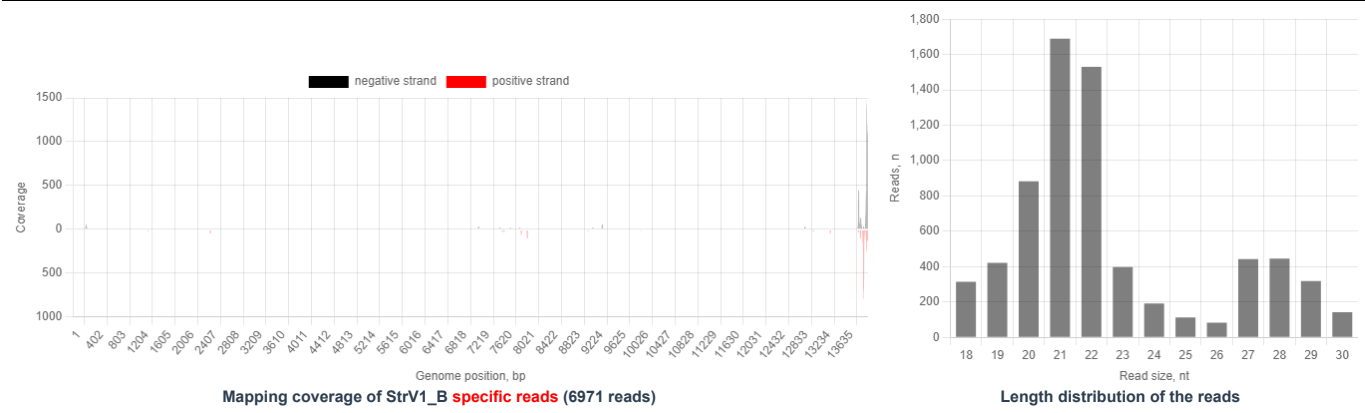

| Dataset | Input reads | Virus | Reference | Mapped reads | Mapped reads, % | RPKM | Forward/Reverse balance | Nonredundant, % | Strain specific | Strain specific, % from total mapped reads | Strain specific, RPKM |
|---------|-------------|-------|-----------|--------------|-----------------|------|-------------------------|-----------------|-----------------|--------------------------------------------|-----------------------|
| 3K_1    | 10000000    | StrV1 | StrV1_C   | 2365         | 0.024           | 16.6 | 1.0                     | 70.7            | 1721            | 72.8                                       | 12.1                  |

| Dataset | Input reads | Virus | Reference | Mapped reads | Mapped reads, % | RPKM | Forward/Reverse balance | Nonredundant, % | Strain specific | Strain specific, % from total mapped reads | Strain specific, RPKM |
|---------|-------------|-------|-----------|--------------|-----------------|------|-------------------------|-----------------|-----------------|--------------------------------------------|-----------------------|
|---------|-------------|-------|-----------|--------------|-----------------|------|-------------------------|-----------------|-----------------|--------------------------------------------|-----------------------|

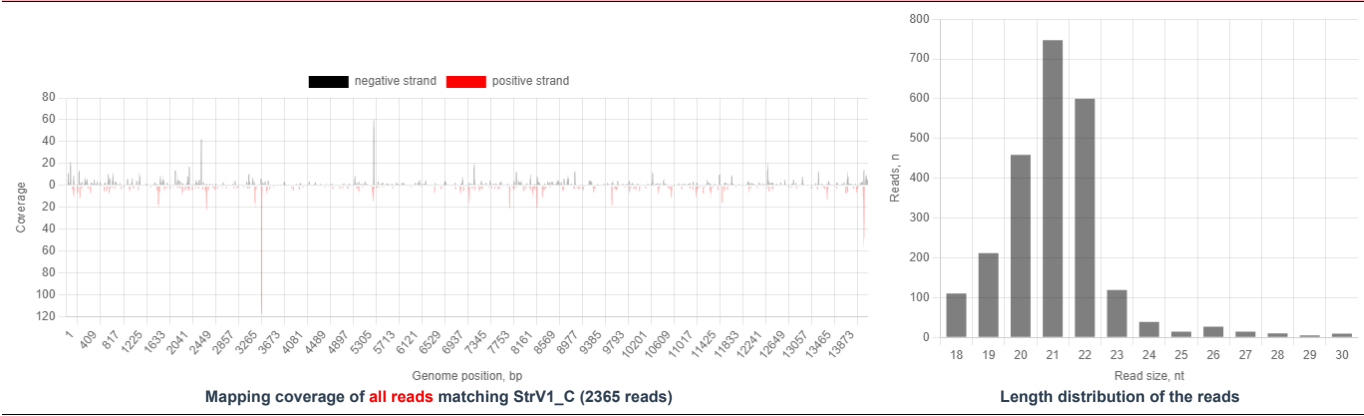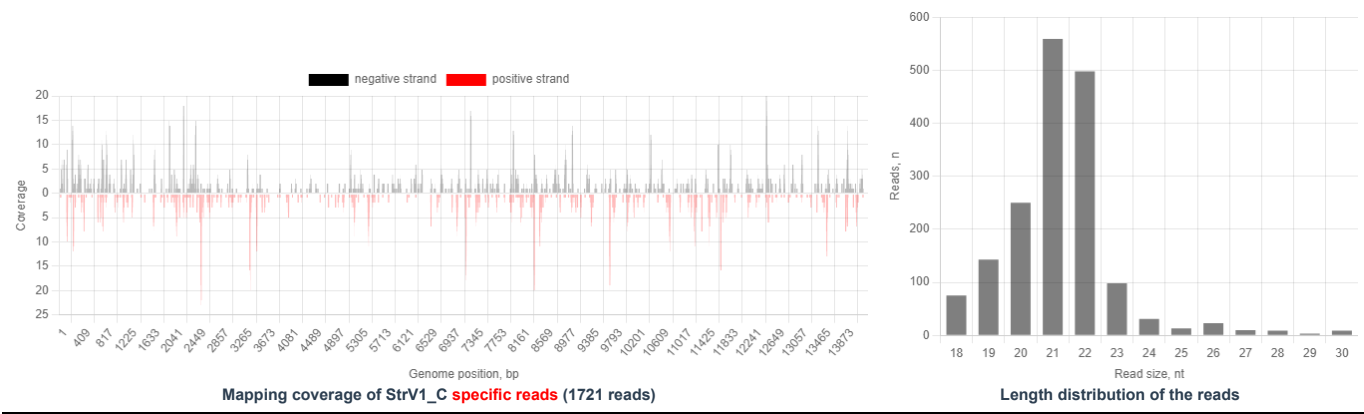

Mappings of the 3K\_2 reads against the viral references.

| Dataset | Input reads | Virus | Reference | Mapped reads | Mapped reads, % | RPKM | Forward/Reverse balance | Nonredundant, % | Strain specific | Strain specific, % from total mapped reads | Strain specific, RPKM |
|---------|-------------|-------|-----------|--------------|-----------------|------|-------------------------|-----------------|-----------------|--------------------------------------------|-----------------------|
| 3K_2    | 10000000    | SCV   | SCV_A     | 11218        | 0.112           | 77.1 | 0.9                     | 58.0            | 8443            | 75.3                                       | 66.5                  |

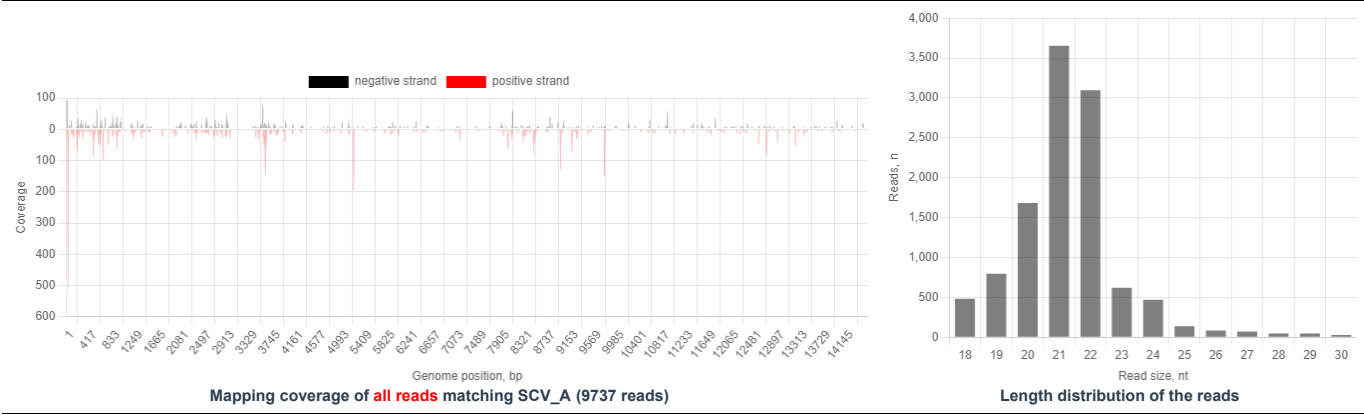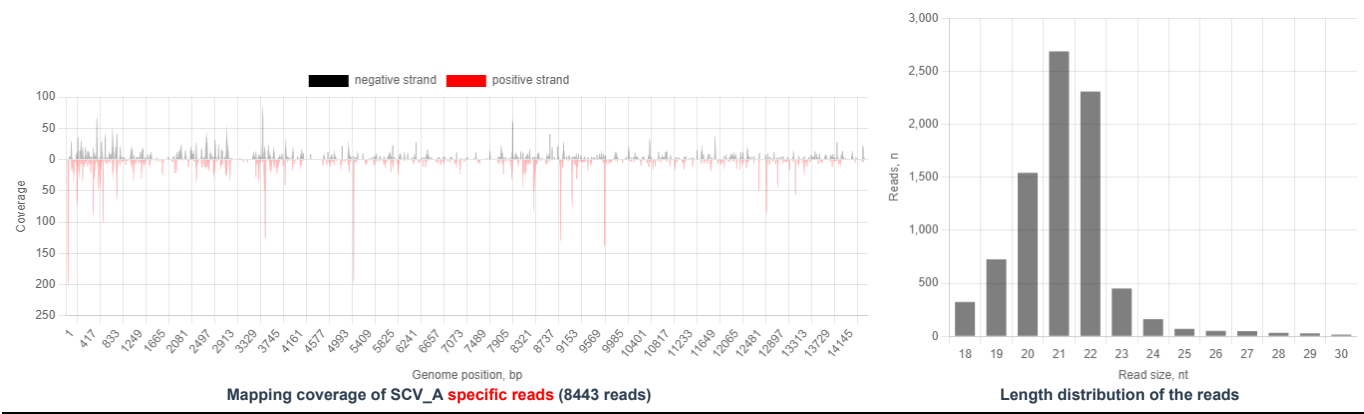

| Dataset | Input reads | Virus | Reference | Mapped reads | Mapped reads, % | RPKM | Forward/Reverse balance | Nonredundant, % | Strain specific | Strain specific, % from total mapped reads | Strain specific, RPKM |
|---------|-------------|-------|-----------|--------------|-----------------|------|-------------------------|-----------------|-----------------|--------------------------------------------|-----------------------|
| 3K_2    | 10000000    | SCV   | SCV_B     | 7197         | 0.072           | 49.4 | 0.8                     | 61.9            | 5294            | 73.6                                       | 38.8                  |

| Dataset | Input reads | Virus | Reference | Mapped reads | Mapped reads, % | RPKM | Forward/Reverse balance | Nonredundant, % | Strain specific | Strain specific, % from total mapped reads | Strain specific, RPKM |
|---------|-------------|-------|-----------|--------------|-----------------|------|-------------------------|-----------------|-----------------|--------------------------------------------|-----------------------|
|---------|-------------|-------|-----------|--------------|-----------------|------|-------------------------|-----------------|-----------------|--------------------------------------------|-----------------------|

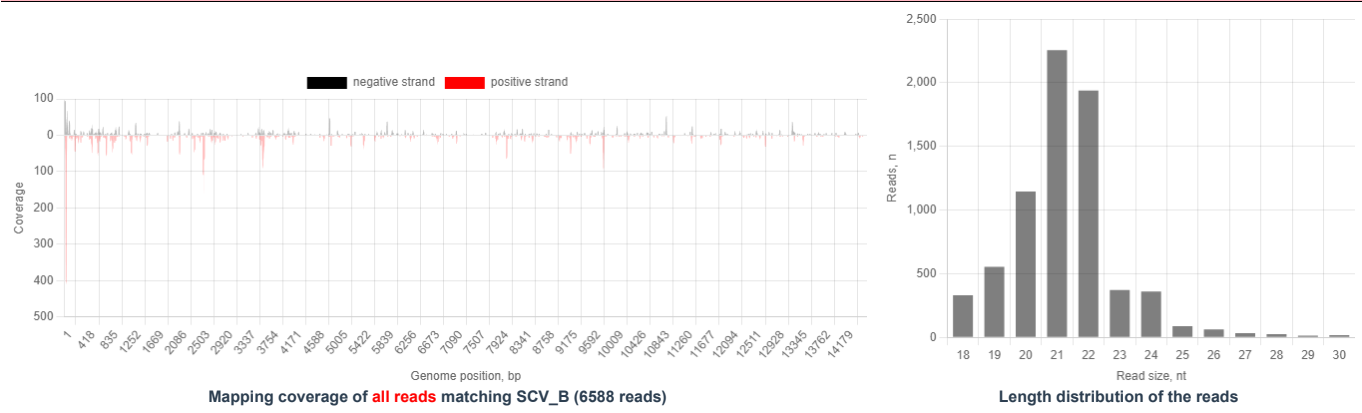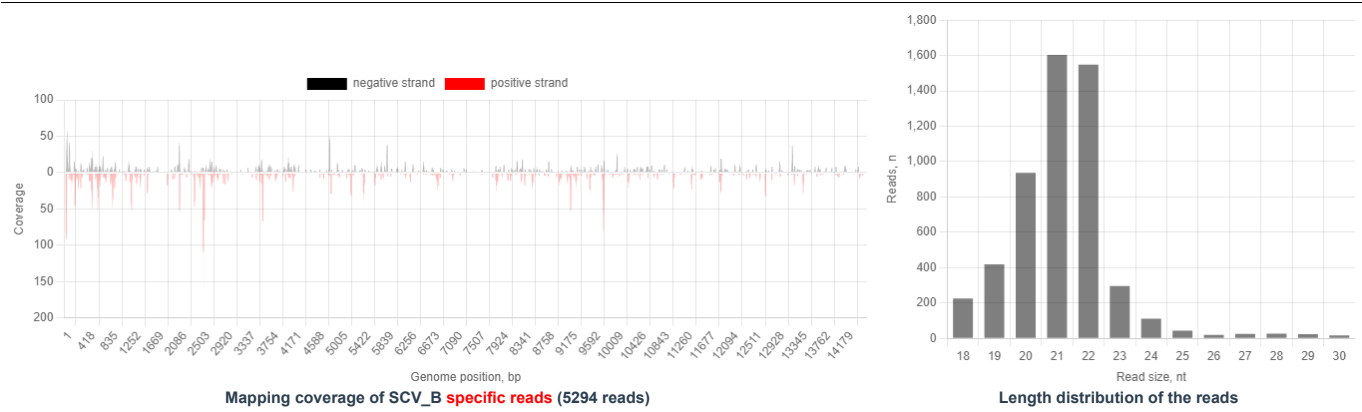

| Dataset | Input reads | Virus | Reference  | Mapped reads | Mapped reads, % | RPKM  | Forward/Reverse balance | Nonredundant, % | Strain specific | Strain specific, % from total mapped reads | Strain specific, RPKM |
|---------|-------------|-------|------------|--------------|-----------------|-------|-------------------------|-----------------|-----------------|--------------------------------------------|-----------------------|
| 3K_2    | 10000000    | SMoV  | SMoV_RNA1A | 9058         | 0.091           | 128.8 | 1.3                     | 51.9            | 4731            | 52.2                                       | 73.8                  |

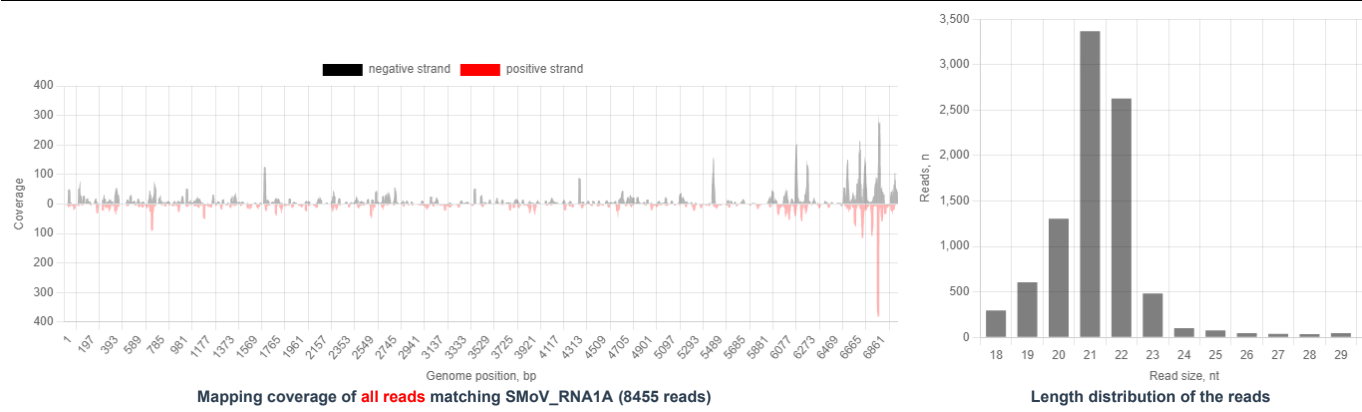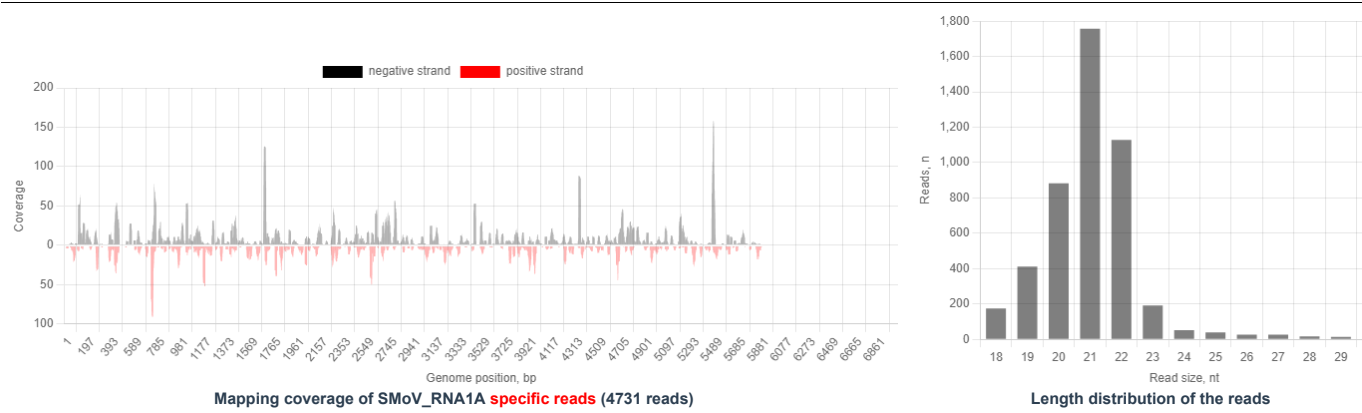

| Dataset | Input reads | Virus | Reference  | Mapped reads | Mapped reads, % | RPKM  | Forward/Reverse balance | Nonredundant, % | Strain specific | Strain specific, % from total mapped reads | Strain specific, RPKM |
|---------|-------------|-------|------------|--------------|-----------------|-------|-------------------------|-----------------|-----------------|--------------------------------------------|-----------------------|
| 3K_2    | 10000000    | SMoV  | SMoV_RNA1B | 7667         | 0.077           | 108.8 | 1.2                     | 51.9            | 3850            | 50.2                                       | 55.3                  |

| Dataset | Input reads | Virus | Reference | Mapped reads | Mapped reads, % | RPKM | Forward/Reverse balance | Nonredundant, % | Strain specific | Strain specific, % from total mapped reads | Strain specific, RPKM |
|---------|-------------|-------|-----------|--------------|-----------------|------|-------------------------|-----------------|-----------------|--------------------------------------------|-----------------------|
|---------|-------------|-------|-----------|--------------|-----------------|------|-------------------------|-----------------|-----------------|--------------------------------------------|-----------------------|

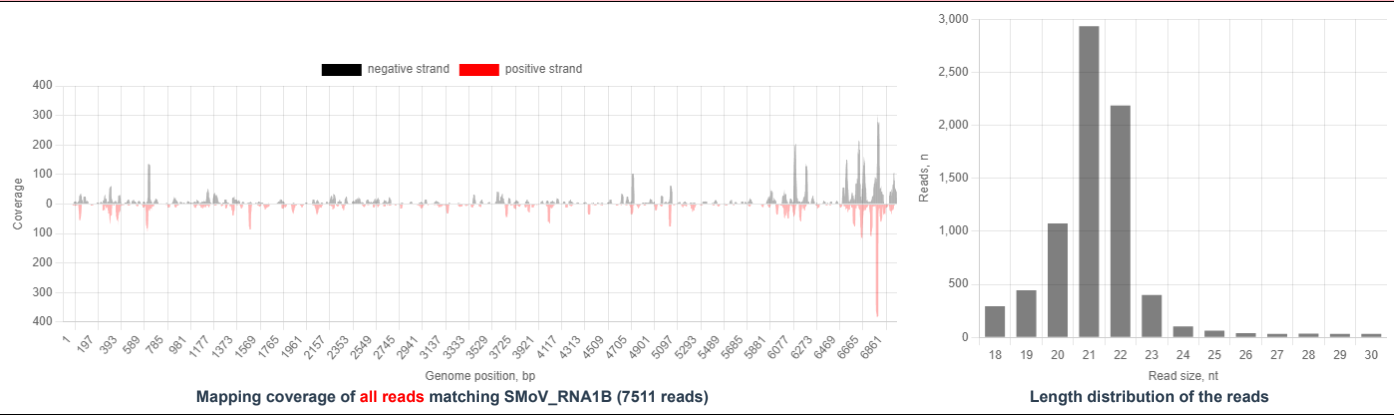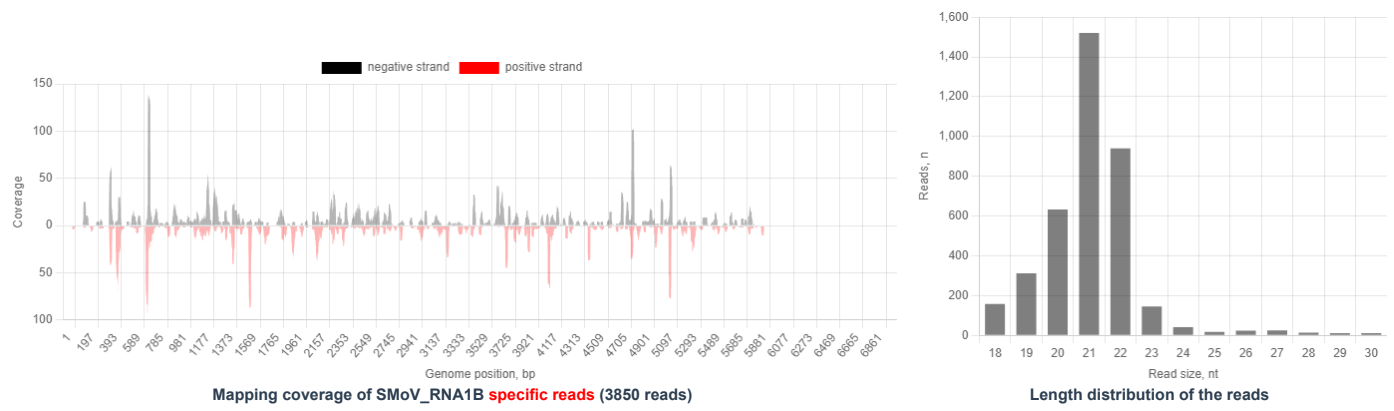

| Dataset | Input reads | Virus | Reference  | Mapped reads | Mapped reads, % | RPKM  | Forward/Reverse balance | Nonredundant, % | Strain specific | Strain specific, % from total mapped reads | Strain specific, RPKM |
|---------|-------------|-------|------------|--------------|-----------------|-------|-------------------------|-----------------|-----------------|--------------------------------------------|-----------------------|
| 3K_2    | 10000000    | SMoV  | SMoV_RNA1C | 8292         | 0.083           | 117.8 | 1.2                     | 52.5            | 4522            | 54.5                                       | 62.9                  |

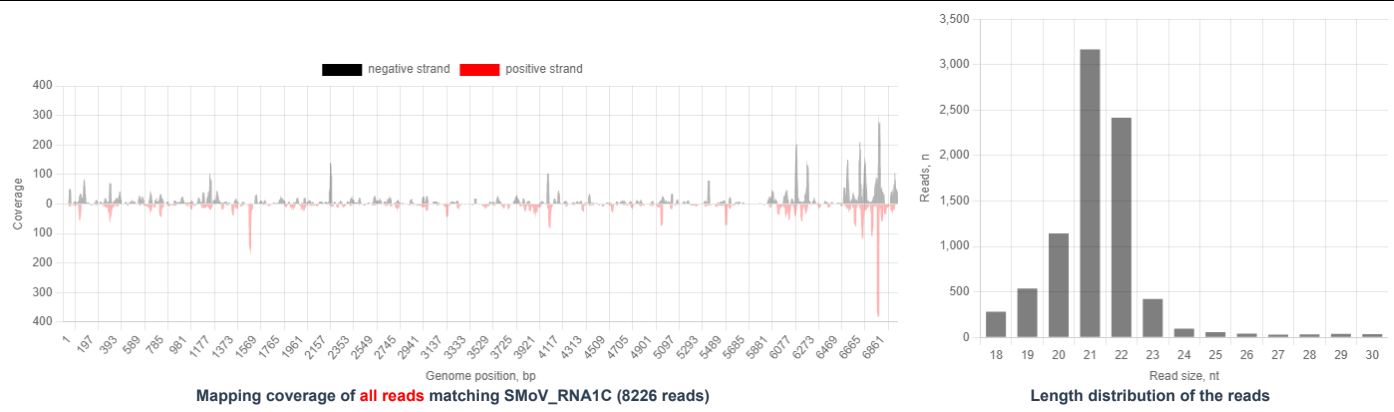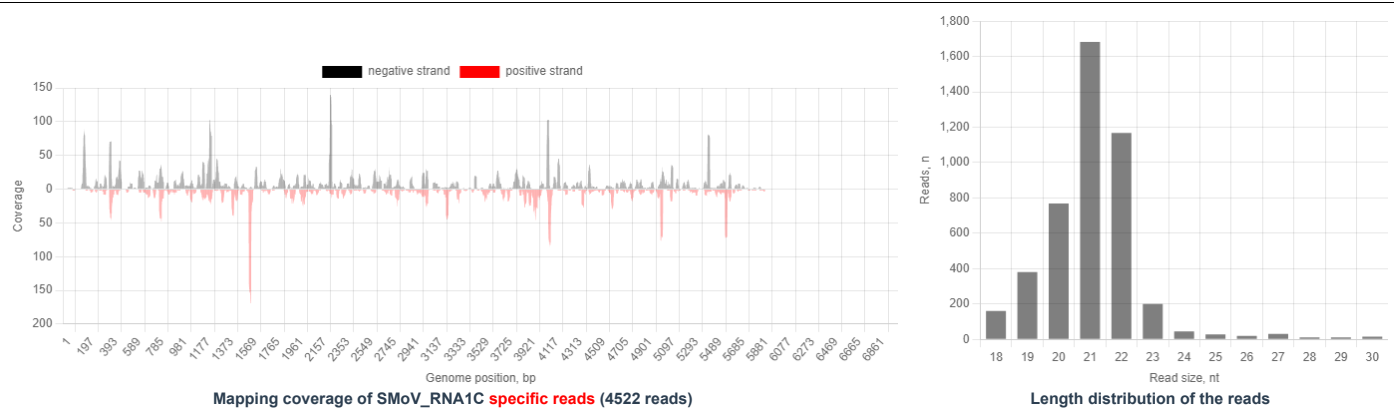

| Dataset | Input reads | Virus | Reference  | Mapped reads | Mapped reads, % | RPKM | Forward/Reverse balance | Nonredundant, % | Strain specific | Strain specific, % from total mapped reads | Strain specific, RPKM |
|---------|-------------|-------|------------|--------------|-----------------|------|-------------------------|-----------------|-----------------|--------------------------------------------|-----------------------|
| 3K_2    | 10000000    | SMoV  | SMoV_RNA2A | 5438         | 0.054           | 86.8 | 1.4                     | 56.8            | 3543            | 65.2                                       | 58.7                  |

| Dataset | Input reads | Virus | Reference | Mapped reads | Mapped reads, % | RPKM | Forward/Reverse balance | Nonredundant, % | Strain specific | Strain specific, % from total mapped reads | Strain specific, RPKM |
|---------|-------------|-------|-----------|--------------|-----------------|------|-------------------------|-----------------|-----------------|--------------------------------------------|-----------------------|
|---------|-------------|-------|-----------|--------------|-----------------|------|-------------------------|-----------------|-----------------|--------------------------------------------|-----------------------|

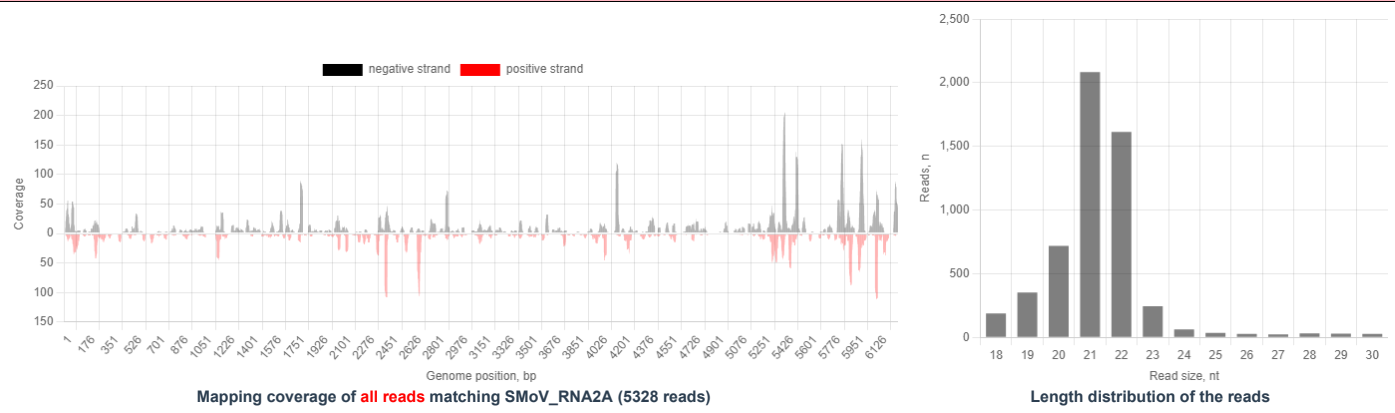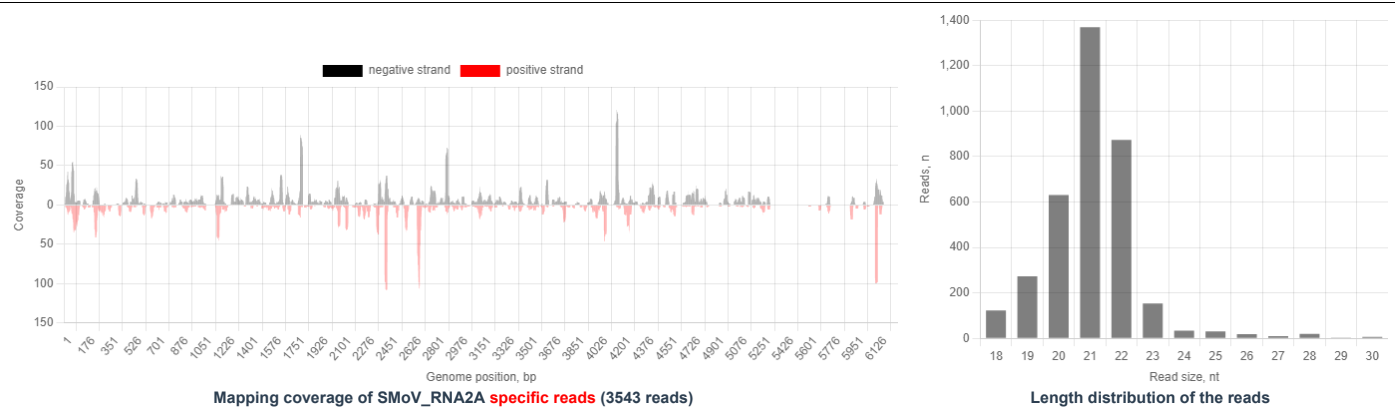

| Dataset | Input reads | Virus | Reference  | Mapped reads | Mapped reads, % | RPKM | Forward/Reverse balance | Nonredundant, % | Strain specific | Strain specific, % from total mapped reads | Strain specific, RPKM |
|---------|-------------|-------|------------|--------------|-----------------|------|-------------------------|-----------------|-----------------|--------------------------------------------|-----------------------|
| 3K_2    | 10000000    | SMoV  | SMoV_RNA2B | 4696         | 0.047           | 74.3 | 1.4                     | 60.7            | 2383            | 50.7                                       | 41.6                  |

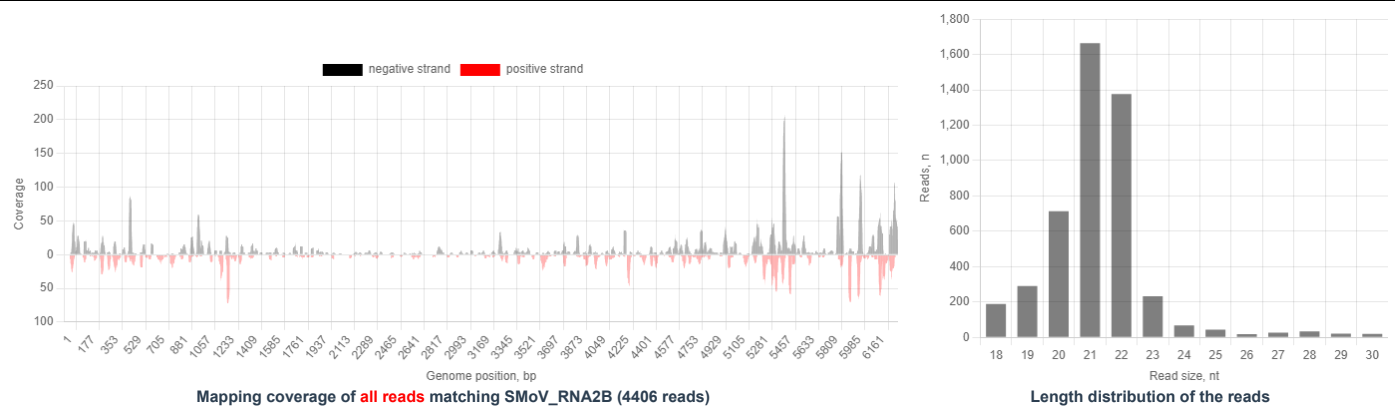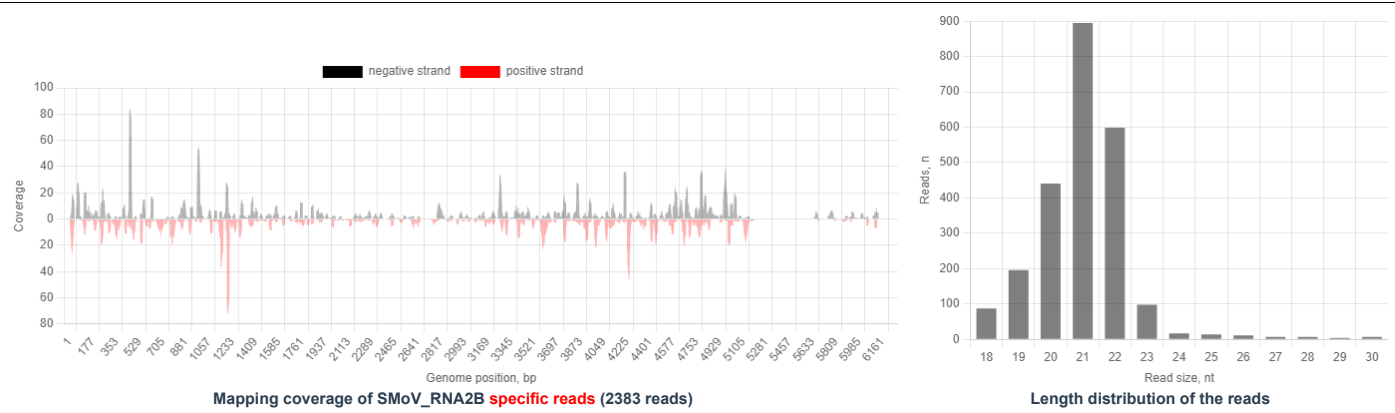

| Dataset | Input reads | Virus | Reference  | Mapped reads | Mapped reads, % | RPKM | Forward/Reverse balance | Nonredundant, % | Strain specific | Strain specific, % from total mapped reads | Strain specific, RPKM |
|---------|-------------|-------|------------|--------------|-----------------|------|-------------------------|-----------------|-----------------|--------------------------------------------|-----------------------|
| 3K_2    | 10000000    | SMoV  | SMoV_RNA2C | 6121         | 0.061           | 96.6 | 1.2                     | 49.8            | 2702            | 44.1                                       | 42.5                  |



| Dataset | Input reads | Virus | Reference | Mapped reads | Mapped reads, % | RPKM | Forward/Reverse balance | Nonredundant, % | Strain specific | Strain specific, % from total mapped reads | Strain specific, RPKM |
|---------|-------------|-------|-----------|--------------|-----------------|------|-------------------------|-----------------|-----------------|--------------------------------------------|-----------------------|
|---------|-------------|-------|-----------|--------------|-----------------|------|-------------------------|-----------------|-----------------|--------------------------------------------|-----------------------|

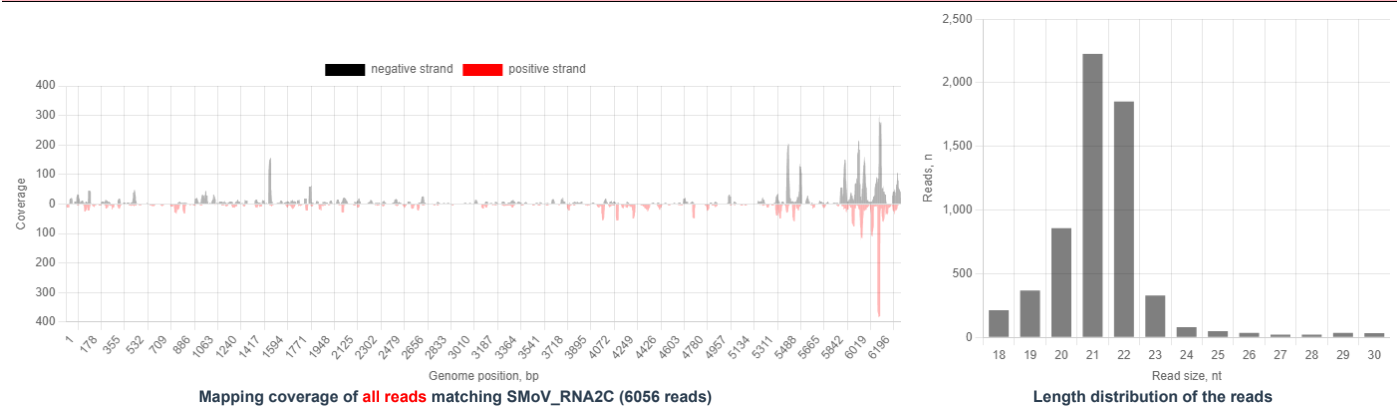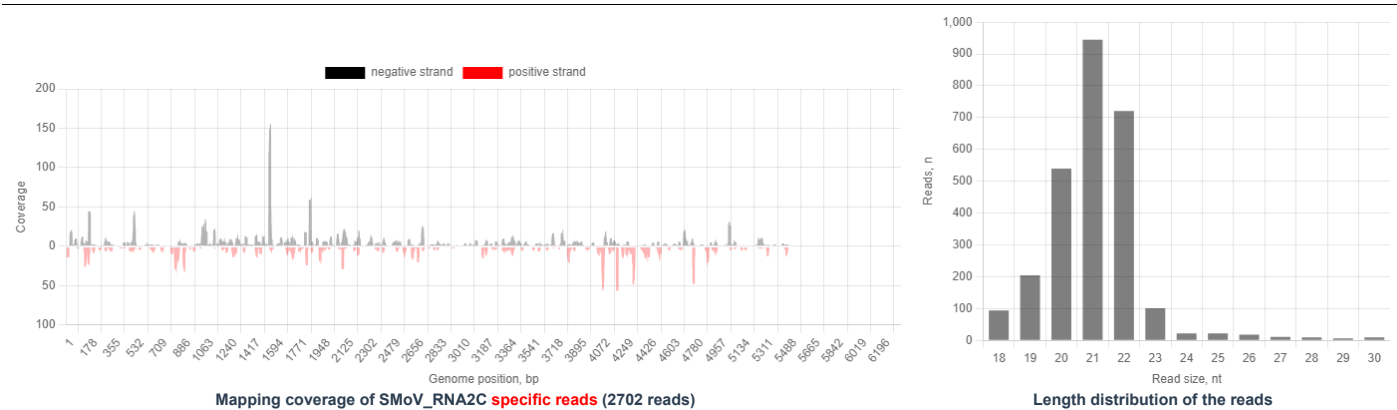

| Dataset | Input reads | Virus | Reference | Mapped reads | Mapped reads, % | RPKM | Forward/Reverse balance | Nonredundant, % | Strain specific | Strain specific, % from total mapped reads | Strain specific, RPKM |
|---------|-------------|-------|-----------|--------------|-----------------|------|-------------------------|-----------------|-----------------|--------------------------------------------|-----------------------|
| 3K_2    | 10000000    | StrV1 | StrV1_A   | 3940         | 0.039           | 27.8 | 1.0                     | 70.2            | 2149            | 54.5                                       | 22.1                  |

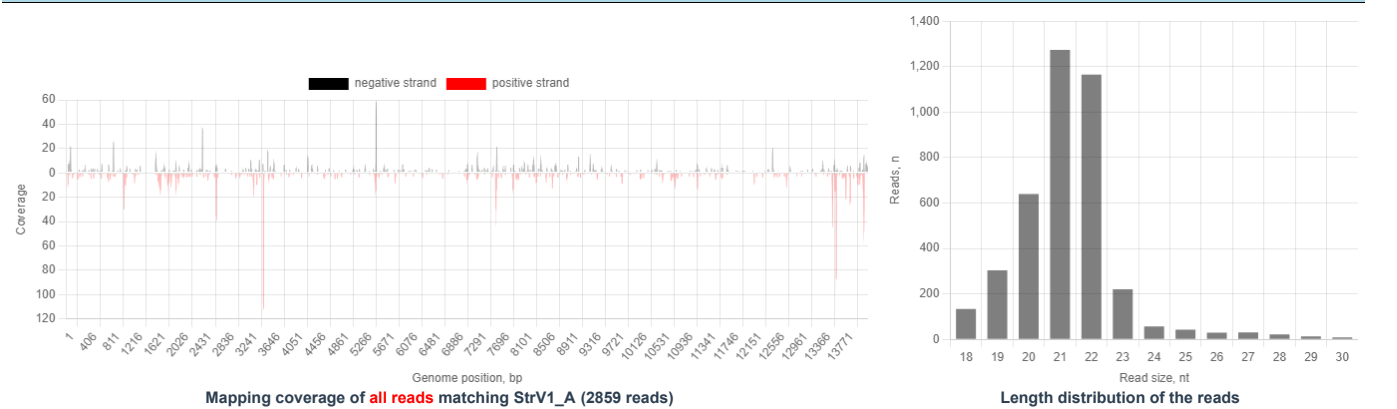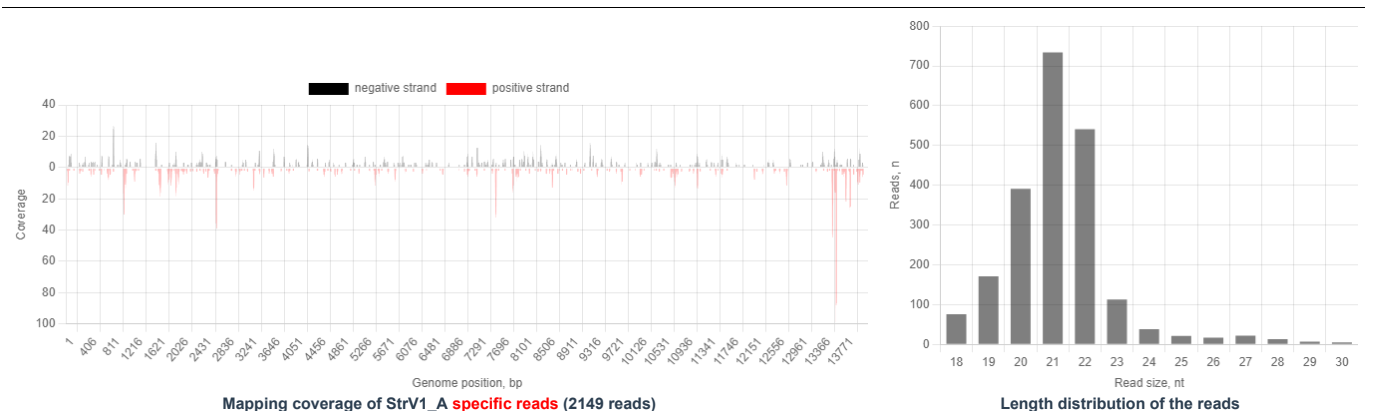

| Dataset | Input reads | Virus | Reference | Mapped reads | Mapped reads, % | RPKM | Forward/Reverse balance | Nonredundant, % | Strain specific | Strain specific, % from total mapped reads | Strain specific, RPKM |
|---------|-------------|-------|-----------|--------------|-----------------|------|-------------------------|-----------------|-----------------|--------------------------------------------|-----------------------|
| 3K_2    | 10000000    | StrV1 | StrV1_B   | 11149        | 0.111           | 79.5 | 1.3                     | 42.2            | 6971            | 62.5                                       | 76.6                  |

| Dataset | Input reads | Virus | Reference | Mapped reads | Mapped reads, % | RPKM | Forward/Reverse balance | Nonredundant, % | Strain specific | Strain specific, % from total mapped reads | Strain specific, RPKM |
|---------|-------------|-------|-----------|--------------|-----------------|------|-------------------------|-----------------|-----------------|--------------------------------------------|-----------------------|
|---------|-------------|-------|-----------|--------------|-----------------|------|-------------------------|-----------------|-----------------|--------------------------------------------|-----------------------|

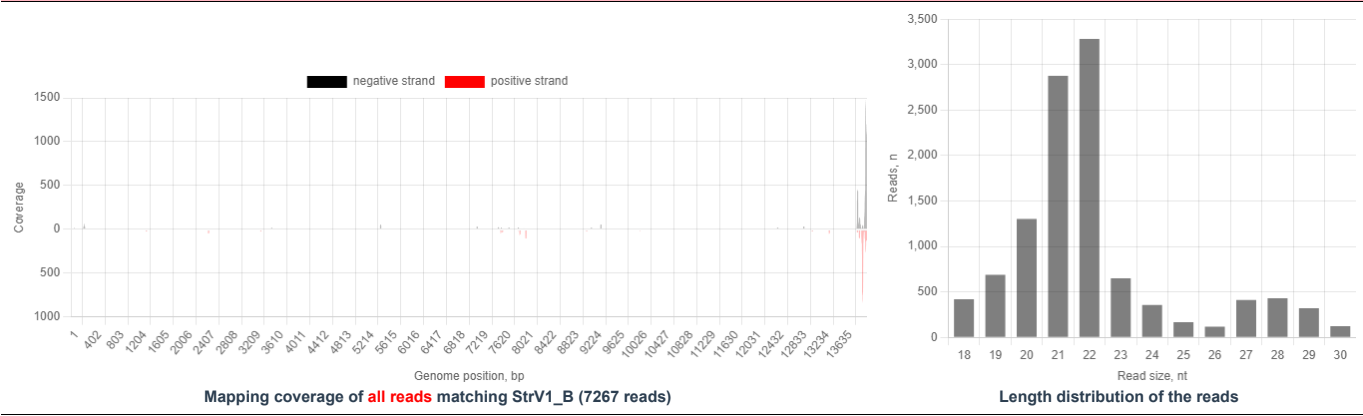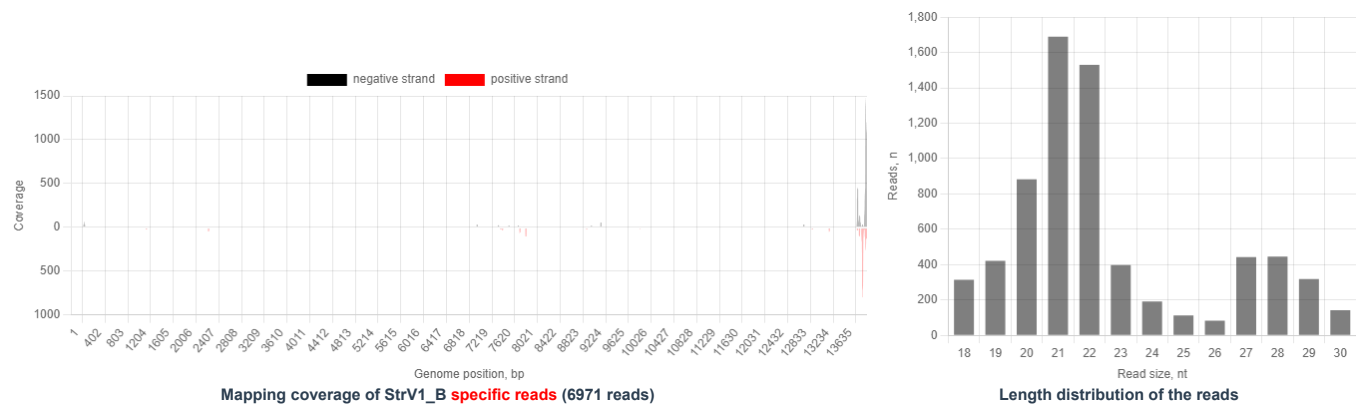

| Dataset | Input reads | Virus | Reference | Mapped reads | Mapped reads, % | RPKM | Forward/Reverse balance | Nonredundant, % | Strain specific | Strain specific, % from total mapped reads | Strain specific, RPKM |
|---------|-------------|-------|-----------|--------------|-----------------|------|-------------------------|-----------------|-----------------|--------------------------------------------|-----------------------|
| 3K_2    | 10000000    | StrV1 | StrV1_C   | 2759         | 0.028           | 19.4 | 1.1                     | 72.4            | 1721            | 62.4                                       | 13.8                  |

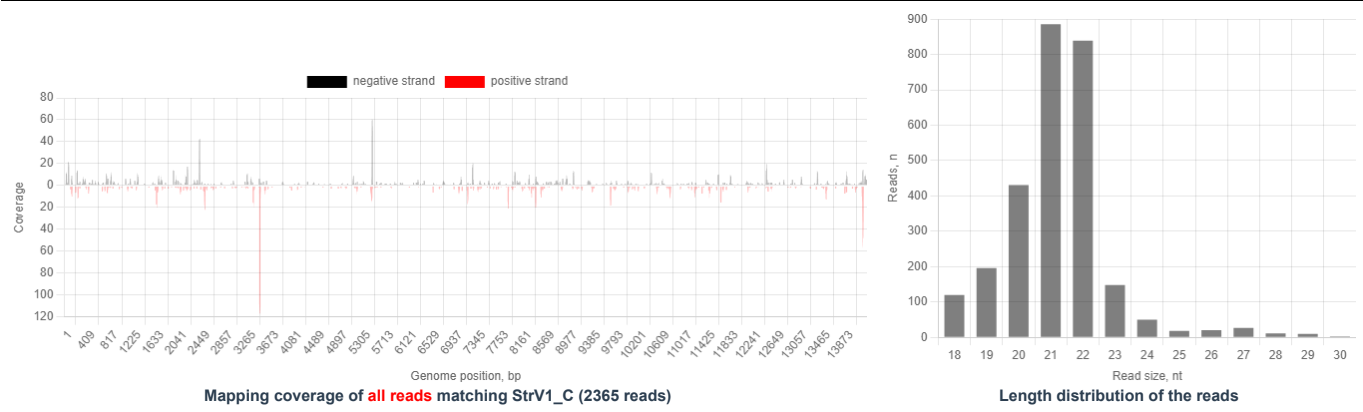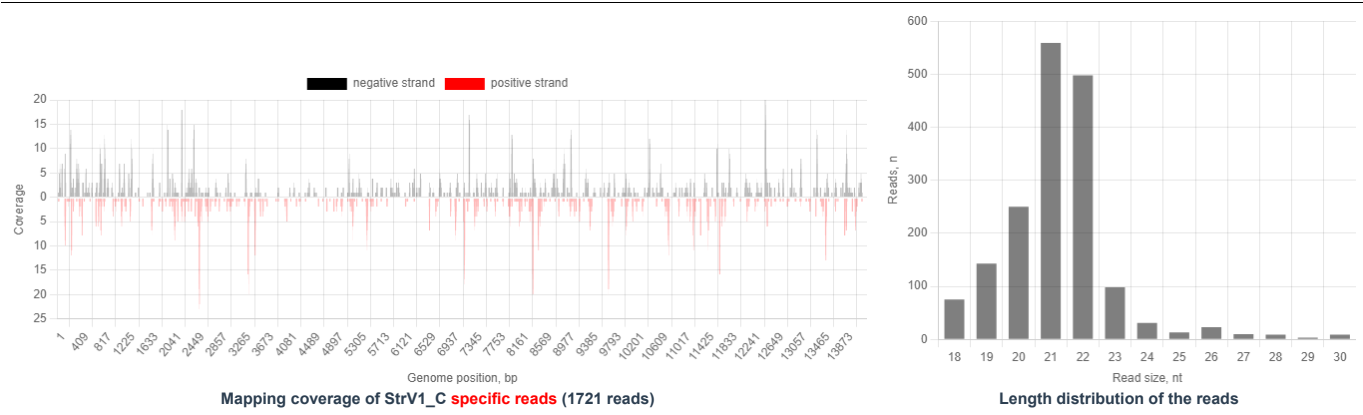

### Mappings of the 3K\_3 reads against the viral references.

| Dataset | Input reads | Virus | Reference | Mapped reads | Mapped reads, % | RPKM | Forward/Reverse balance | Nonredundant, % | Strain specific | Strain specific, % from total mapped reads | Strain specific, RPKM |
|---------|-------------|-------|-----------|--------------|-----------------|------|-------------------------|-----------------|-----------------|--------------------------------------------|-----------------------|
| 3K_3    | 10000000    | SCV   | SCV_A     | 13890        | 0.139           | 95.5 | 1.0                     | 47.3            | 8443            | 60.8                                       | 84.7                  |

| Dataset | Input reads | Virus | Reference | Mapped reads | Mapped reads, % | RPKM | Forward/Reverse balance | Nonredundant, % | Strain specific | Strain specific, % from total mapped reads | Strain specific, RPKM |
|---------|-------------|-------|-----------|--------------|-----------------|------|-------------------------|-----------------|-----------------|--------------------------------------------|-----------------------|
|---------|-------------|-------|-----------|--------------|-----------------|------|-------------------------|-----------------|-----------------|--------------------------------------------|-----------------------|

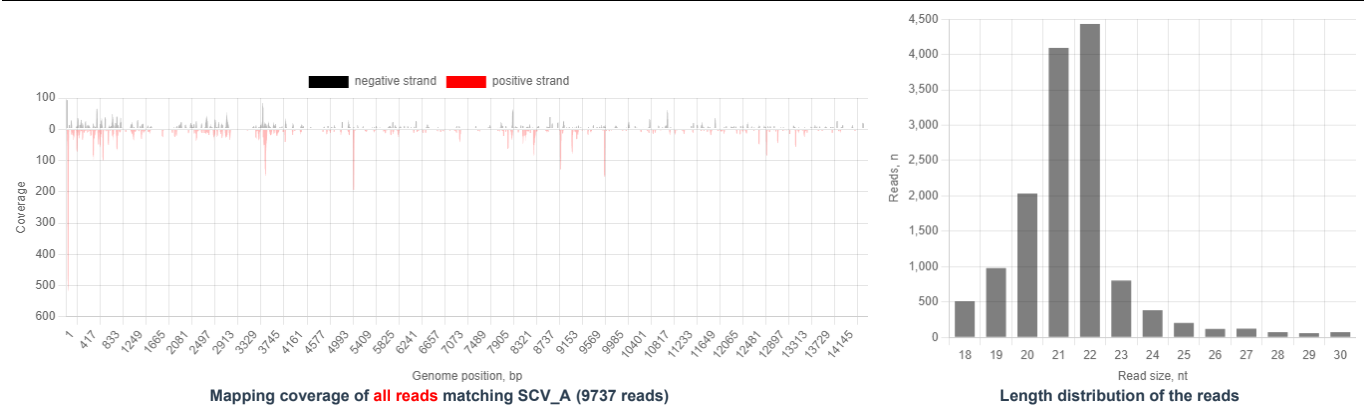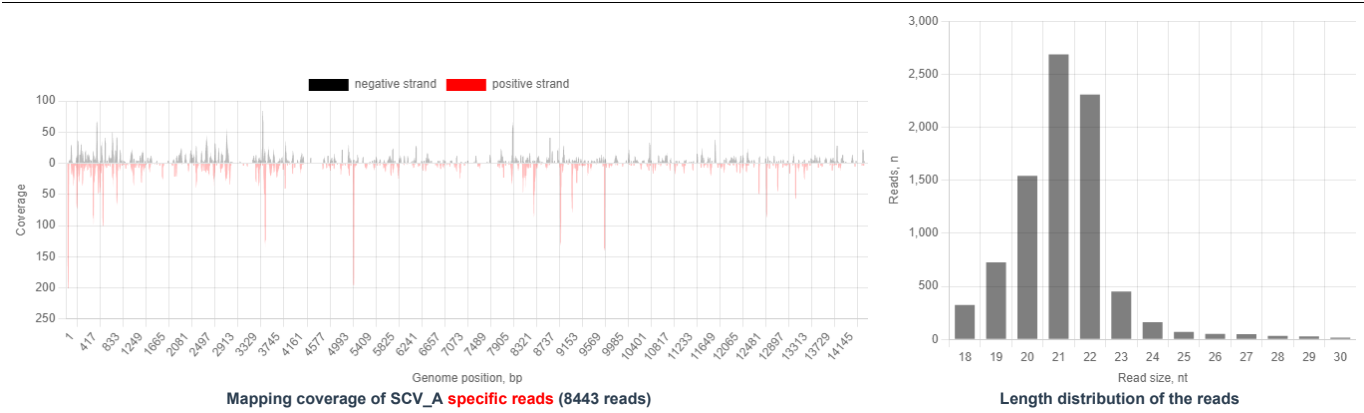

| Dataset | Input reads | Virus | Reference | Mapped reads | Mapped reads, % | RPKM | Forward/Reverse balance | Nonredundant, % | Strain specific | Strain specific, % from total mapped reads | Strain specific, RPKM |
|---------|-------------|-------|-----------|--------------|-----------------|------|-------------------------|-----------------|-----------------|--------------------------------------------|-----------------------|
| 3K_3    | 10000000    | SCV   | SCV_B     | 6567         | 0.066           | 45.1 | 1.0                     | 52.9            | 5294            | 80.6                                       | 34.3                  |

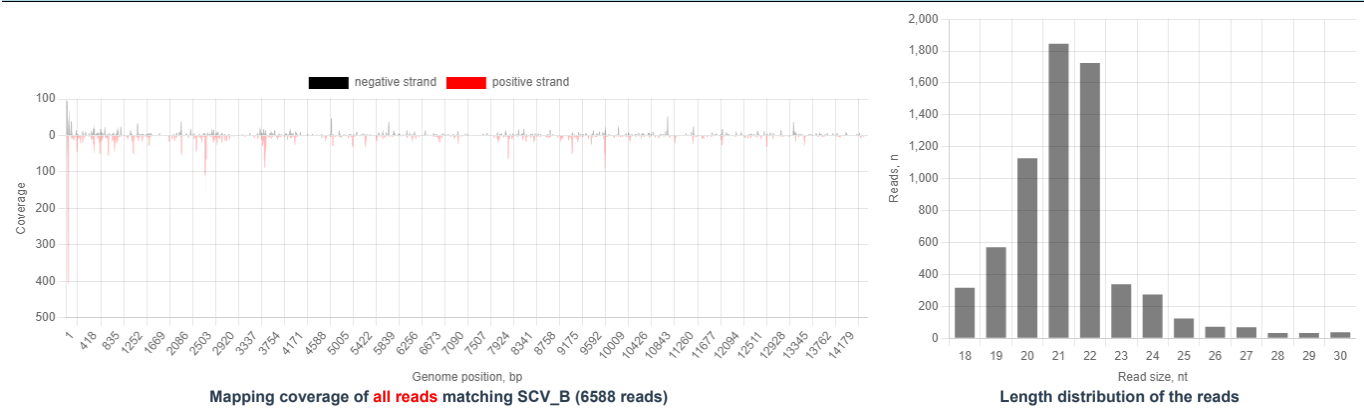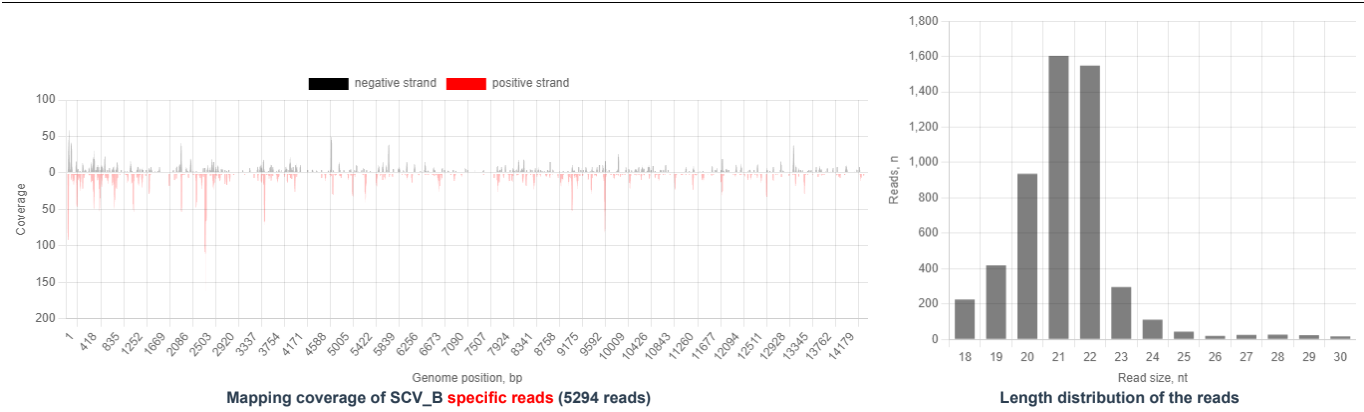

| Dataset | Input reads | Virus | Reference  | Mapped reads | Mapped reads, % | RPKM | Forward/Reverse balance | Nonredundant, % | Strain specific | Strain specific, % from total mapped reads | Strain specific, RPKM |
|---------|-------------|-------|------------|--------------|-----------------|------|-------------------------|-----------------|-----------------|--------------------------------------------|-----------------------|
| 3K_3    | 10000000    | SMoV  | SMoV_RNA1A | 5642         | 0.056           | 80.1 | 1.7                     | 48.8            | 4731            | 83.9                                       | 43.3                  |

| Dataset | Input reads | Virus | Reference | Mapped reads | Mapped reads, % | RPKM | Forward/Reverse balance | Nonredundant, % | Strain specific | Strain specific, % from total mapped reads | Strain specific, RPKM |
|---------|-------------|-------|-----------|--------------|-----------------|------|-------------------------|-----------------|-----------------|--------------------------------------------|-----------------------|
|---------|-------------|-------|-----------|--------------|-----------------|------|-------------------------|-----------------|-----------------|--------------------------------------------|-----------------------|

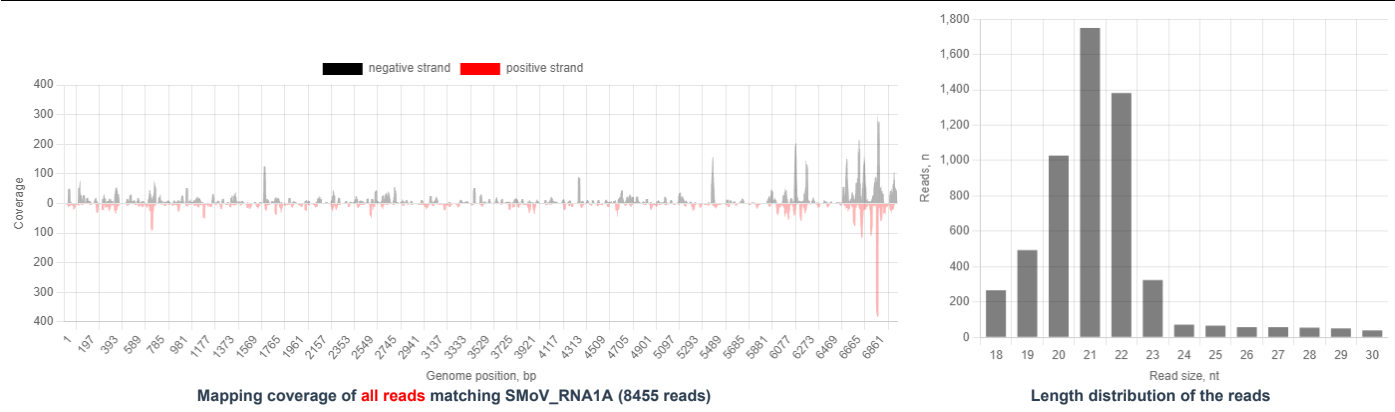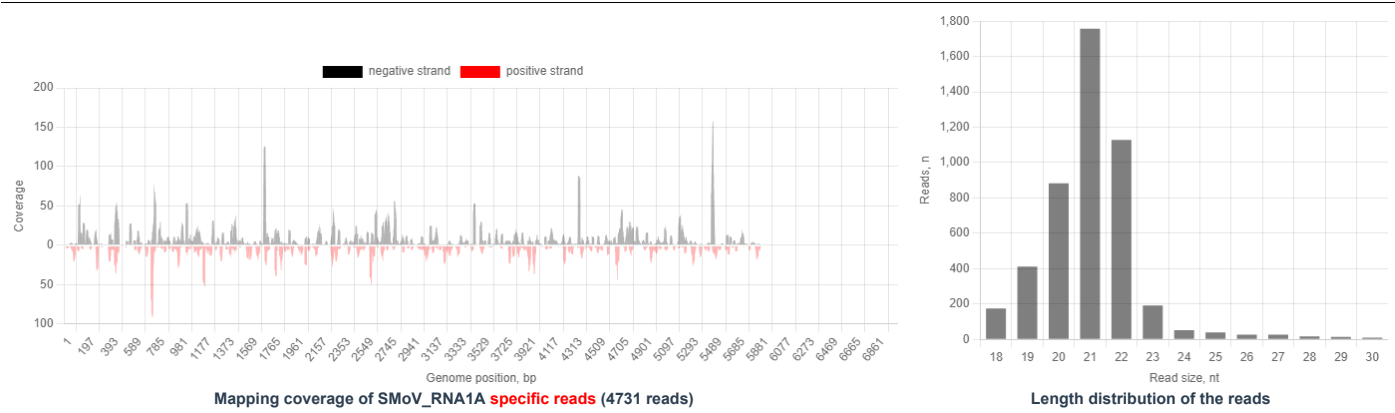

| Dataset | Input reads | Virus | Reference  | Mapped reads | Mapped reads, % | RPKM | Forward/Reverse balance | Nonredundant, % | Strain specific | Strain specific, % from total mapped reads | Strain specific, RPKM |
|---------|-------------|-------|------------|--------------|-----------------|------|-------------------------|-----------------|-----------------|--------------------------------------------|-----------------------|
| 3K_3    | 10000000    | SMoV  | SMoV_RNA1B | 5082         | 0.051           | 72.1 | 1.3                     | 47.1            | 3850            | 75.8                                       | 36.4                  |

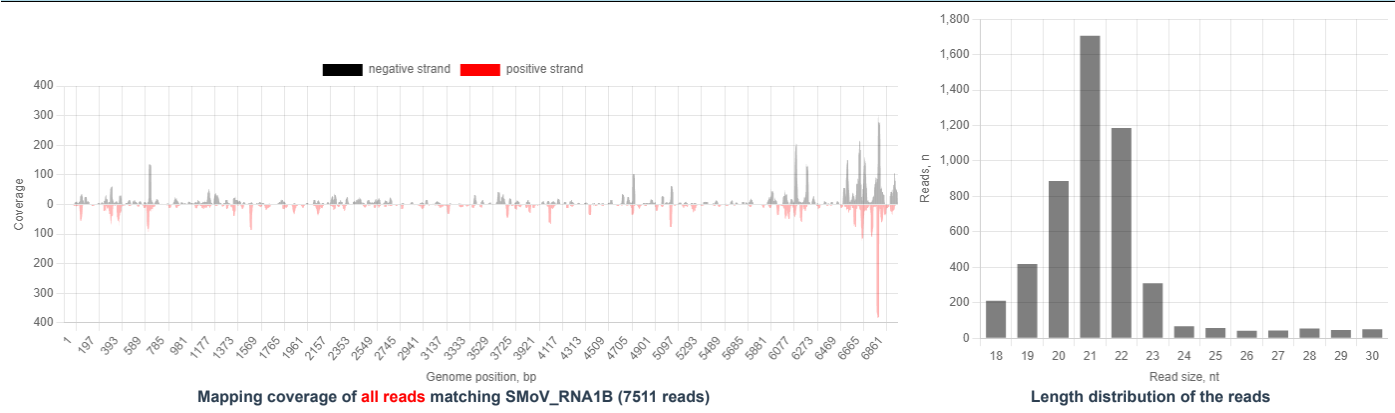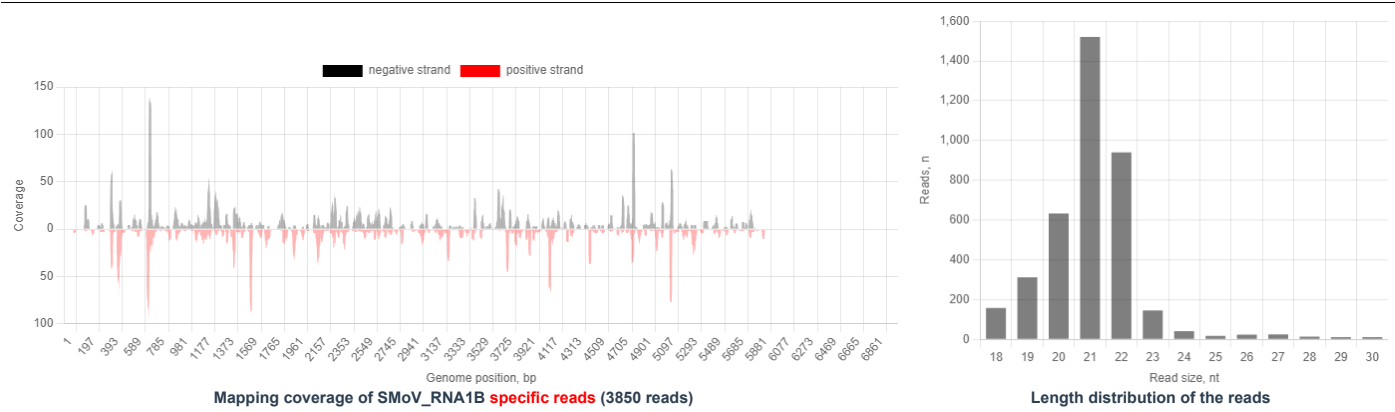

| Dataset | Input reads | Virus | Reference  | Mapped reads | Mapped reads, % | RPKM | Forward/Reverse balance | Nonredundant, % | Strain specific | Strain specific, % from total mapped reads | Strain specific, RPKM |
|---------|-------------|-------|------------|--------------|-----------------|------|-------------------------|-----------------|-----------------|--------------------------------------------|-----------------------|
| 3K_3    | 10000000    | SMoV  | SMoV_RNA1C | 5308         | 0.053           | 75.4 | 1.3                     | 48.4            | 4522            | 85.2                                       | 38.7                  |

| Dataset | Input reads | Virus | Reference | Mapped reads | Mapped reads, % | RPKM | Forward/Reverse balance | Nonredundant, % | Strain specific | Strain specific, % from total mapped reads | Strain specific, RPKM |
|---------|-------------|-------|-----------|--------------|-----------------|------|-------------------------|-----------------|-----------------|--------------------------------------------|-----------------------|
|---------|-------------|-------|-----------|--------------|-----------------|------|-------------------------|-----------------|-----------------|--------------------------------------------|-----------------------|

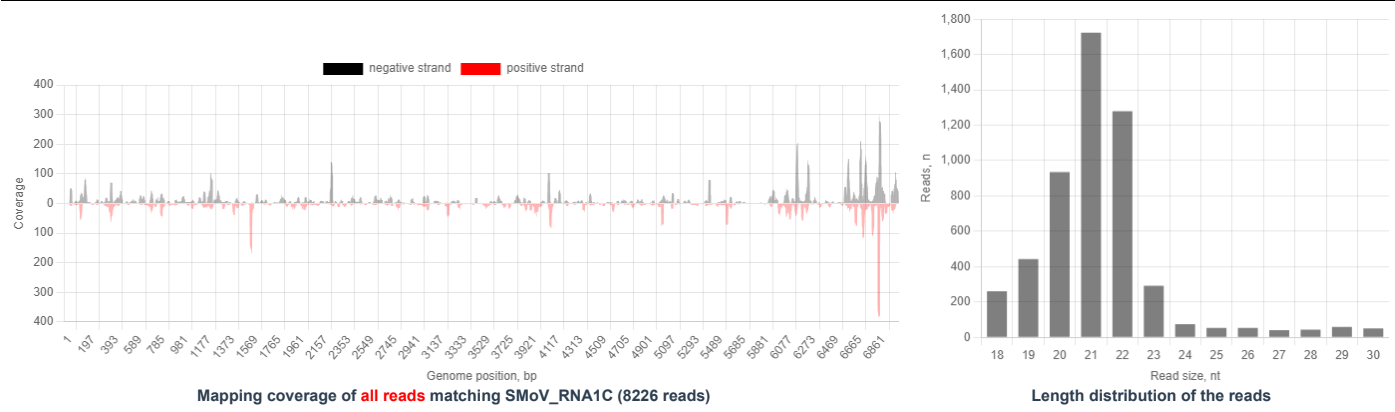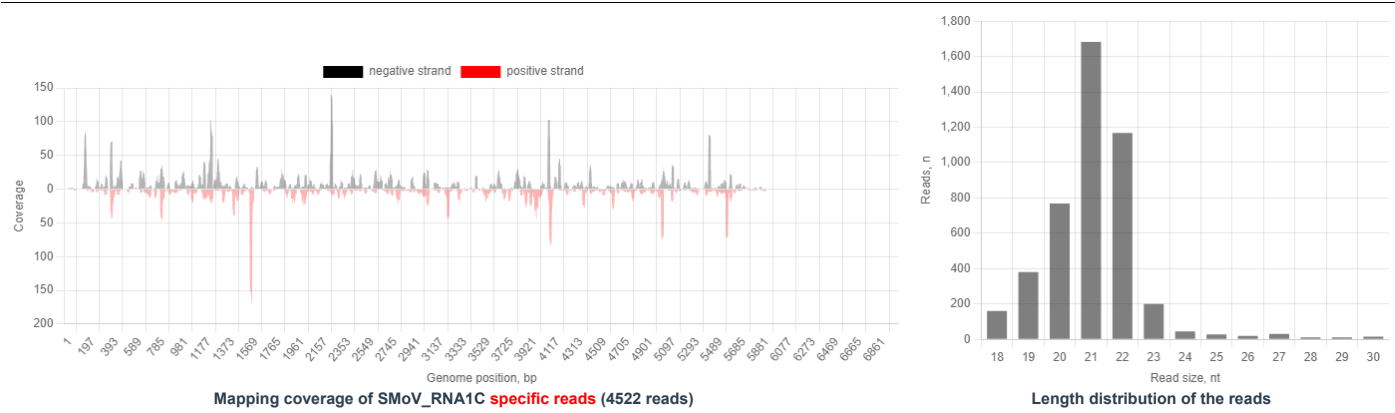

| Dataset | Input reads | Virus | Reference  | Mapped reads | Mapped reads, % | RPKM | Forward/Reverse balance | Nonredundant, % | Strain specific | Strain specific, % from total mapped reads | Strain specific, RPKM |
|---------|-------------|-------|------------|--------------|-----------------|------|-------------------------|-----------------|-----------------|--------------------------------------------|-----------------------|
| 3K_3    | 10000000    | SMoV  | SMoV_RNA2A | 3527         | 0.035           | 56.2 | 1.6                     | 52.3            | 3543            | 100.5                                      | 34.7                  |

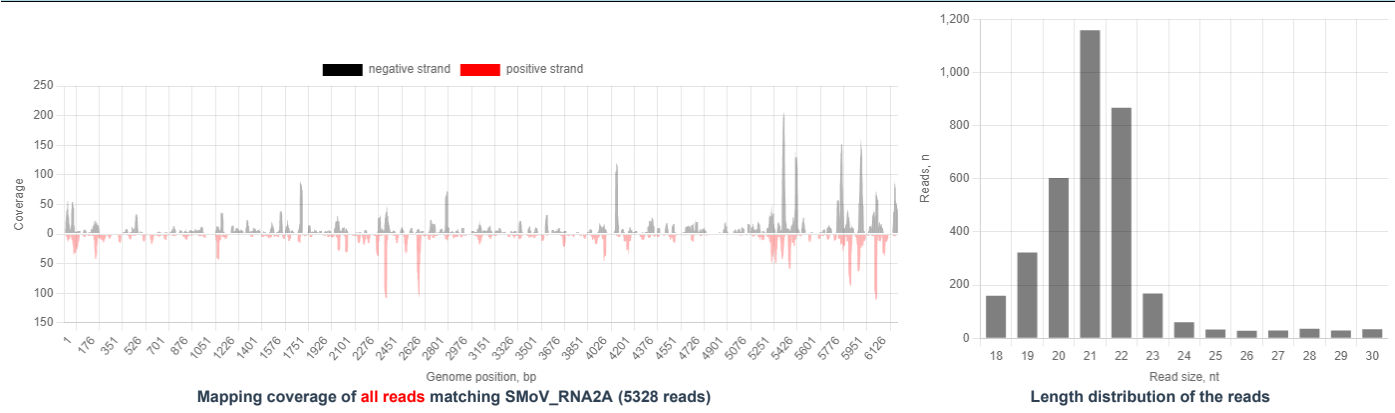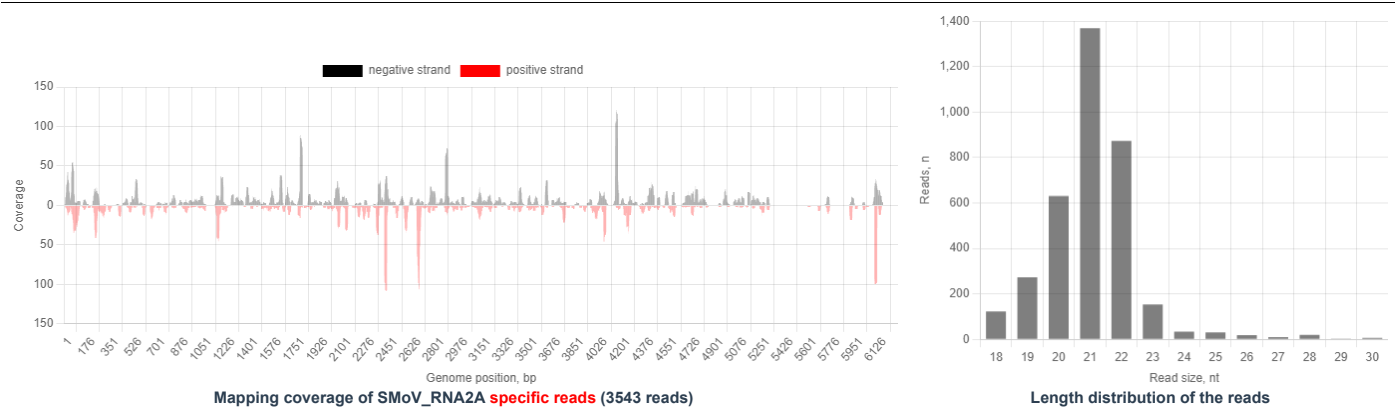

| Dataset | Input reads | Virus | Reference  | Mapped reads | Mapped reads, % | RPKM | Forward/Reverse balance | Nonredundant, % | Strain specific | Strain specific, % from total mapped reads | Strain specific, RPKM |
|---------|-------------|-------|------------|--------------|-----------------|------|-------------------------|-----------------|-----------------|--------------------------------------------|-----------------------|
| 3K_3    | 10000000    | SMoV  | SMoV_RNA2B | 3053         | 0.031           | 48.3 | 1.6                     | 52.5            | 2383            | 78.1                                       | 24.4                  |

| Dataset | Input reads | Virus | Reference | Mapped reads | Mapped reads, % | RPKM | Forward/Reverse balance | Nonredundant, % | Strain specific | Strain specific, % from total mapped reads | Strain specific, RPKM |
|---------|-------------|-------|-----------|--------------|-----------------|------|-------------------------|-----------------|-----------------|--------------------------------------------|-----------------------|
|---------|-------------|-------|-----------|--------------|-----------------|------|-------------------------|-----------------|-----------------|--------------------------------------------|-----------------------|

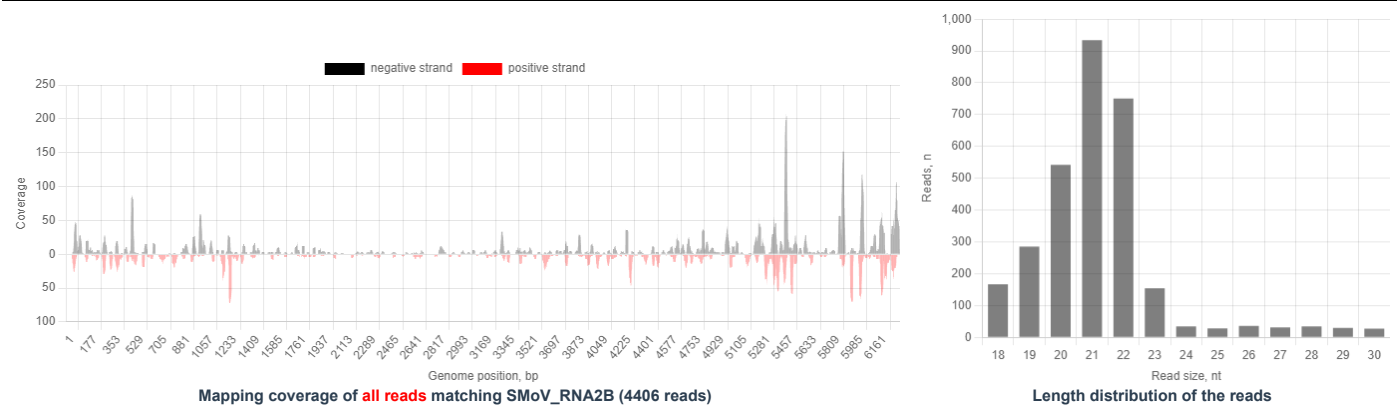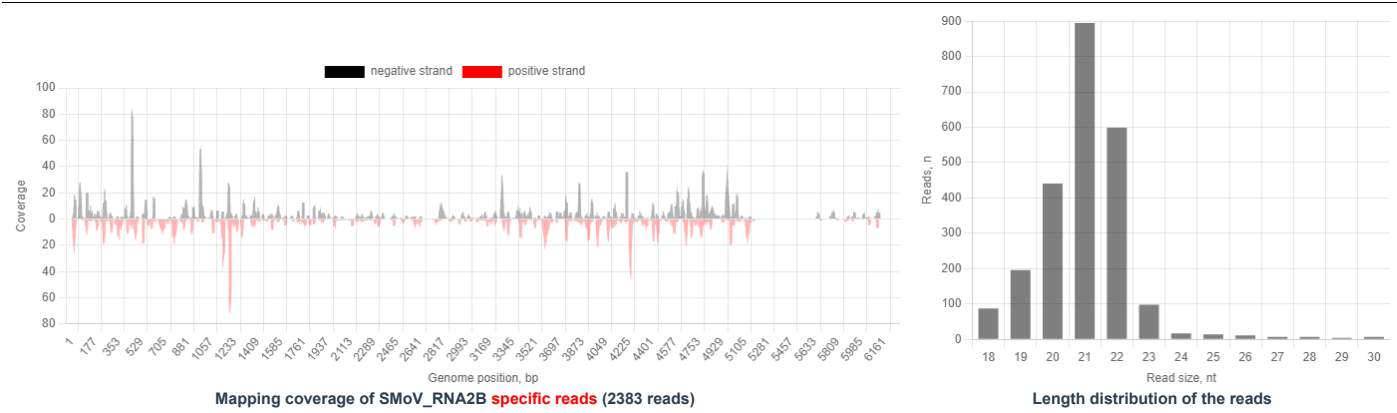

| Dataset | Input reads | Virus | Reference  | Mapped reads | Mapped reads, % | RPKM | Forward/Reverse balance | Nonredundant, % | Strain specific | Strain specific, % from total mapped reads | Strain specific, RPKM |
|---------|-------------|-------|------------|--------------|-----------------|------|-------------------------|-----------------|-----------------|--------------------------------------------|-----------------------|
| 3K_3    | 10000000    | SMoV  | SMoV_RNA2C | 4212         | 0.042           | 66.4 | 1.5                     | 47.3            | 2702            | 64.2                                       | 30.3                  |

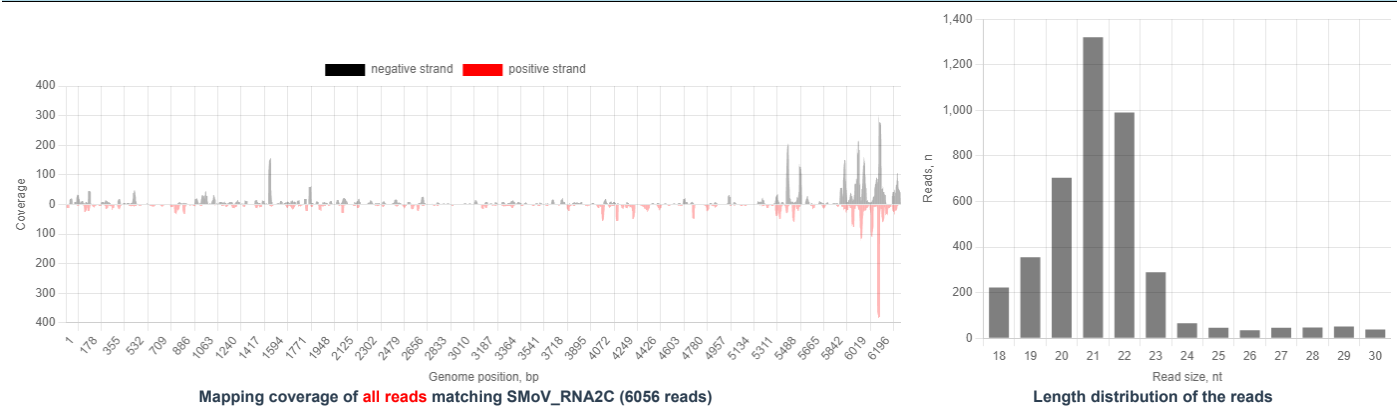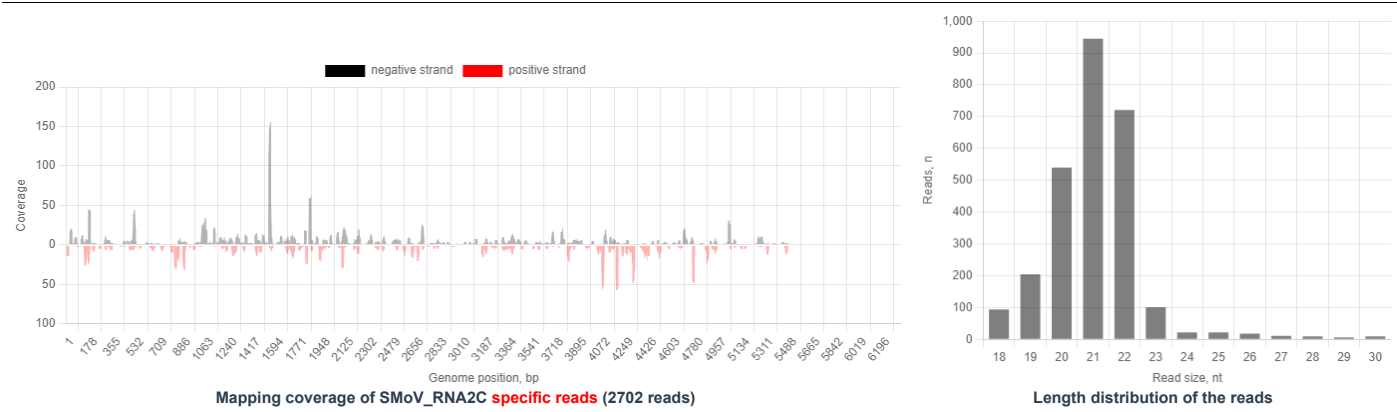

| Dataset | Input reads | Virus | Reference | Mapped reads | Mapped reads, % | RPKM | Forward/Reverse balance | Nonredundant, % | Strain specific | Strain specific, % from total mapped reads | Strain specific, RPKM |
|---------|-------------|-------|-----------|--------------|-----------------|------|-------------------------|-----------------|-----------------|--------------------------------------------|-----------------------|
| 3K_3    | 10000000    | StrV1 | StrV1_A   | 2437         | 0.024           | 17.2 | 1.0                     | 61.3            | 2149            | 88.2                                       | 13.2                  |

| Dataset | Input reads | Virus | Reference | Mapped reads | Mapped reads, % | RPKM | Forward/Reverse balance | Nonredundant, % | Strain specific | Strain specific, % from total mapped reads | Strain specific, RPKM |
|---------|-------------|-------|-----------|--------------|-----------------|------|-------------------------|-----------------|-----------------|--------------------------------------------|-----------------------|
|---------|-------------|-------|-----------|--------------|-----------------|------|-------------------------|-----------------|-----------------|--------------------------------------------|-----------------------|

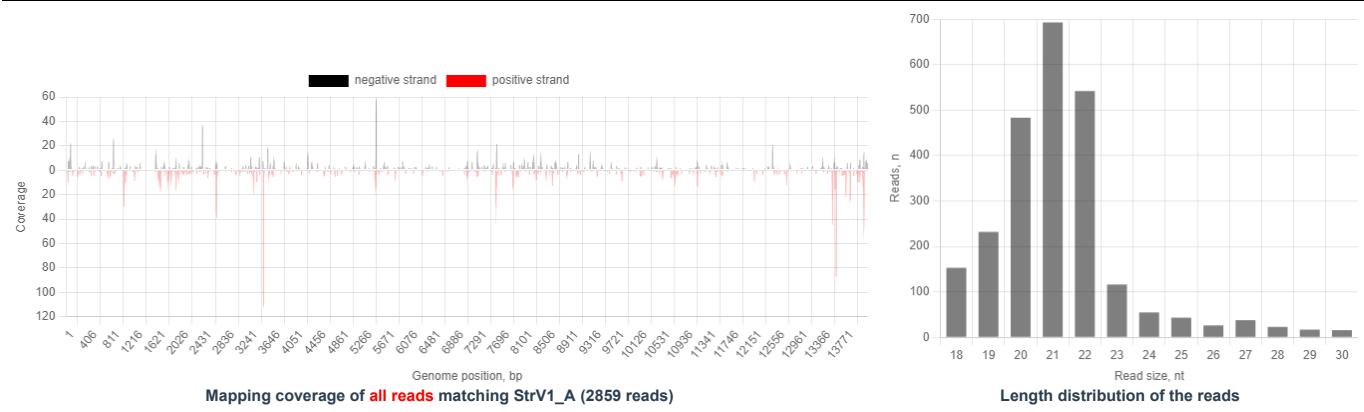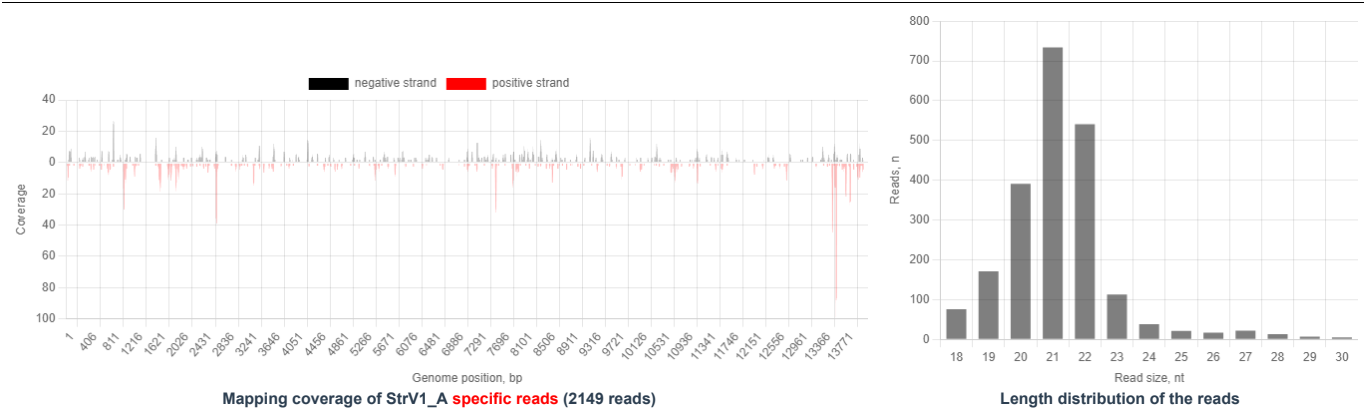

| Dataset | Input reads | Virus | Reference | Mapped reads | Mapped reads, % | RPKM | Forward/Reverse balance | Nonredundant, % | Strain specific | Strain specific, % from total mapped reads | Strain specific, RPKM |
|---------|-------------|-------|-----------|--------------|-----------------|------|-------------------------|-----------------|-----------------|--------------------------------------------|-----------------------|
| 3K_3    | 10000000    | StrV1 | StrV1_B   | 6422         | 0.064           | 45.8 | 1.6                     | 40.3            | 6971            | 108.5                                      | 44.0                  |

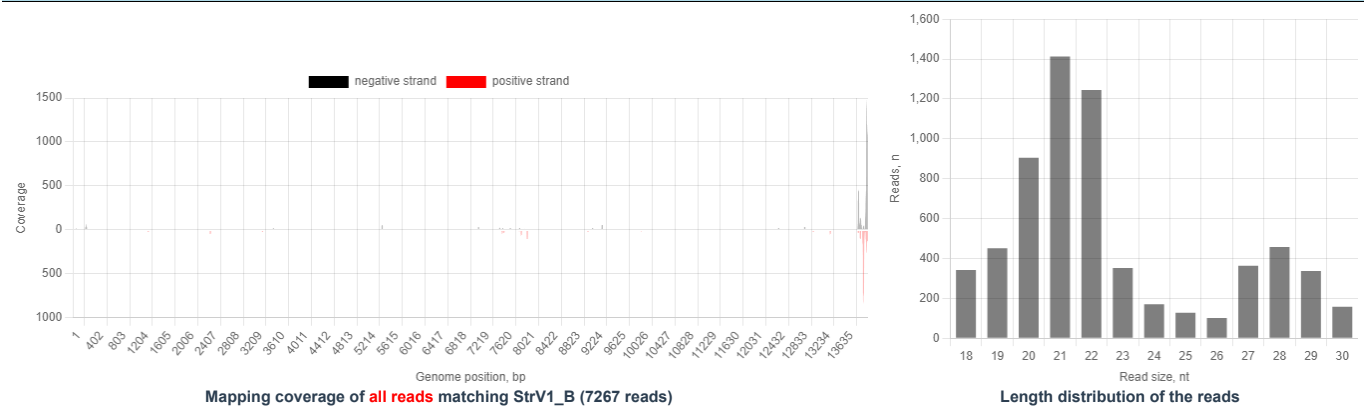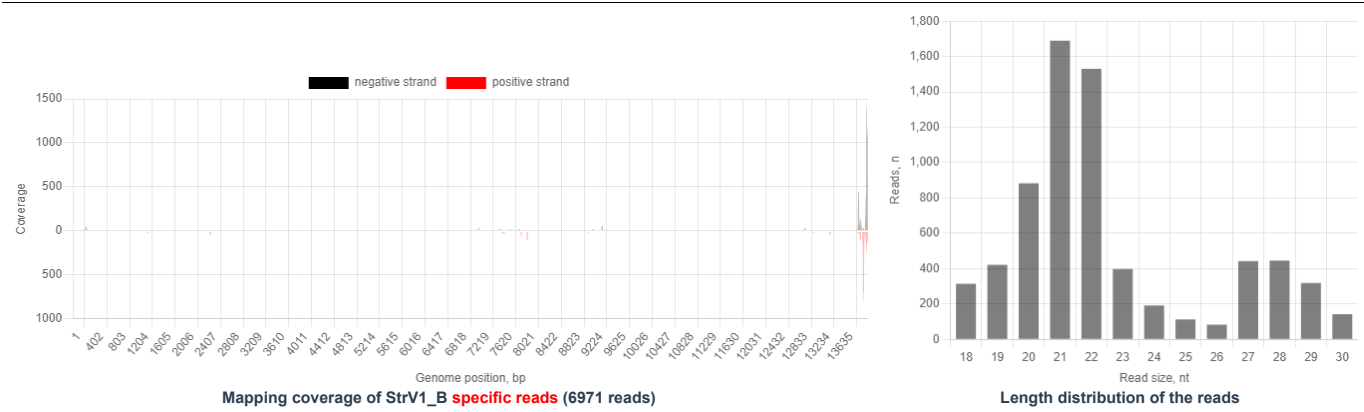

| Dataset | Input reads | Virus | Reference | Mapped reads | Mapped reads, % | RPKM | Forward/Reverse balance | Nonredundant, % | Strain specific | Strain specific, % from total mapped reads | Strain specific, RPKM |
|---------|-------------|-------|-----------|--------------|-----------------|------|-------------------------|-----------------|-----------------|--------------------------------------------|-----------------------|
| 3K_3    | 10000000    | StrV1 | StrV1_C   | 2004         | 0.020           | 14.1 | 1.1                     | 61.6            | 1721            | 85.9                                       | 9.9                   |

| Dataset | Input reads | Virus | Reference | Mapped reads | Mapped reads, % | RPKM | Forward/Reverse balance | Nonredundant, % | Strain specific | Strain specific, % from total mapped reads | Strain specific, RPKM |
|---------|-------------|-------|-----------|--------------|-----------------|------|-------------------------|-----------------|-----------------|--------------------------------------------|-----------------------|
|---------|-------------|-------|-----------|--------------|-----------------|------|-------------------------|-----------------|-----------------|--------------------------------------------|-----------------------|

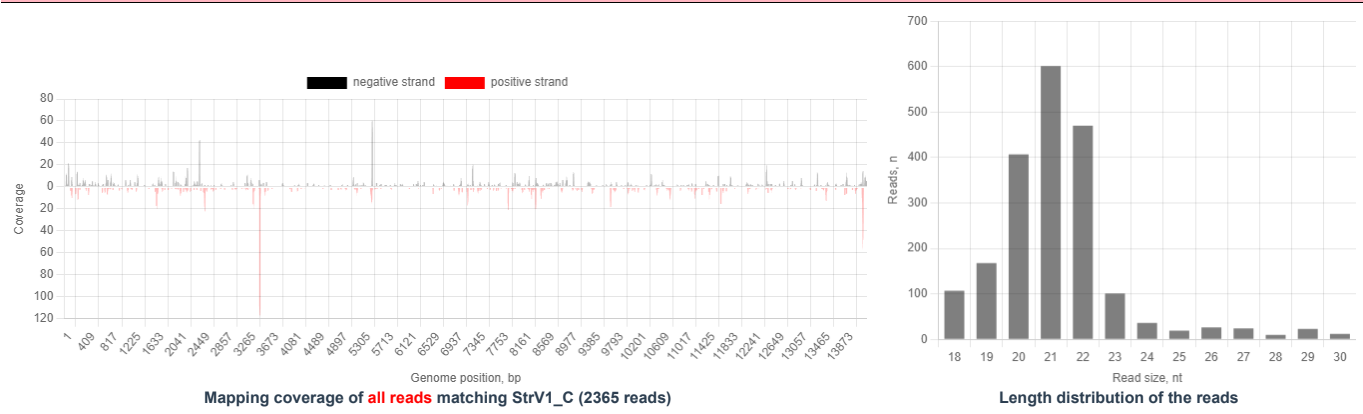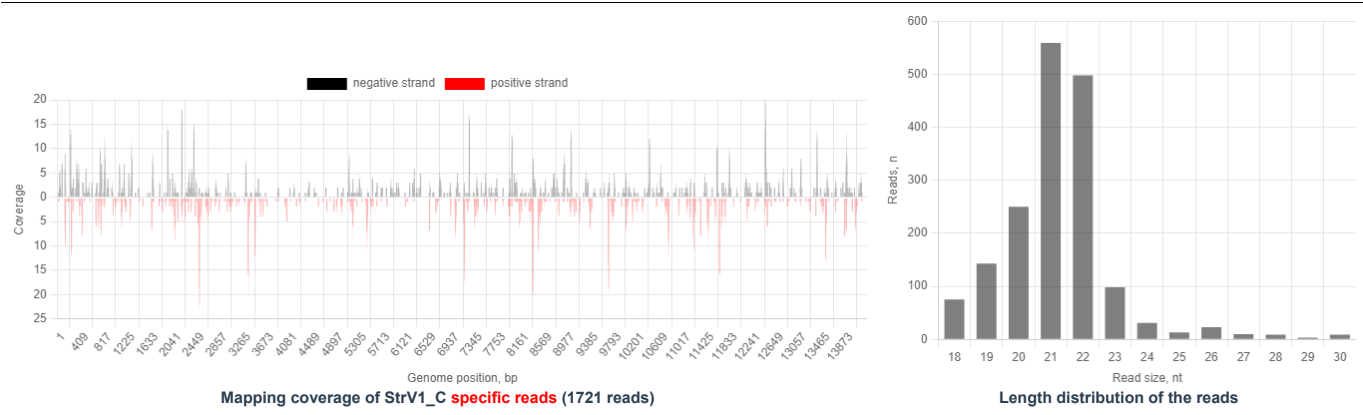

### Mappings of the 3K\_4 reads against the viral references.

| Dataset | Input reads | Virus | Reference | Mapped reads | Mapped reads, % | RPKM  | Forward/Reverse balance | Nonredundant, % | Strain specific | Strain specific, % from total mapped reads | Strain specific, RPKM |
|---------|-------------|-------|-----------|--------------|-----------------|-------|-------------------------|-----------------|-----------------|--------------------------------------------|-----------------------|
| 3K_4    | 10000000    | SCV   | SCV_A     | 16741        | 0.167           | 115.1 | 0.9                     | 52.8            | 8443            | 50.4                                       | 100.2                 |

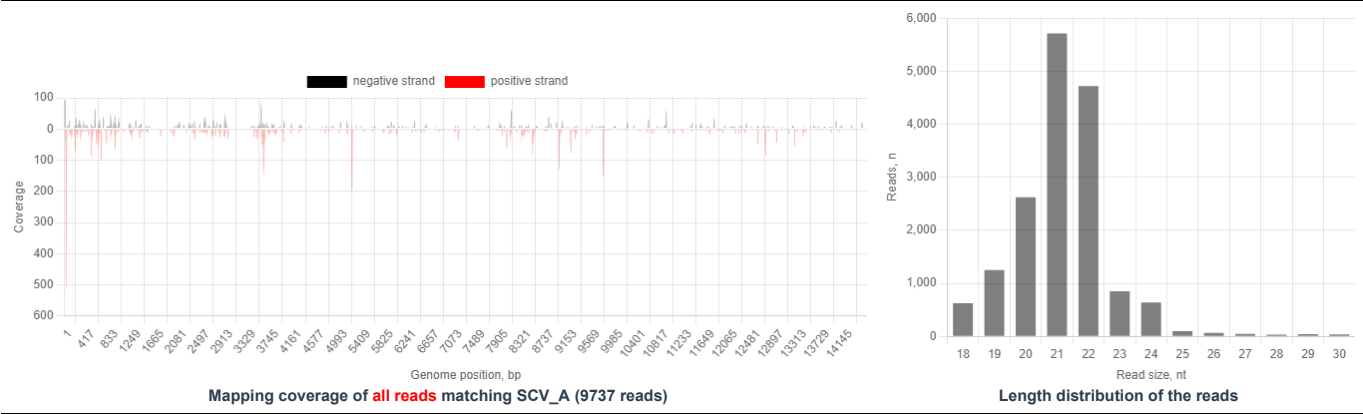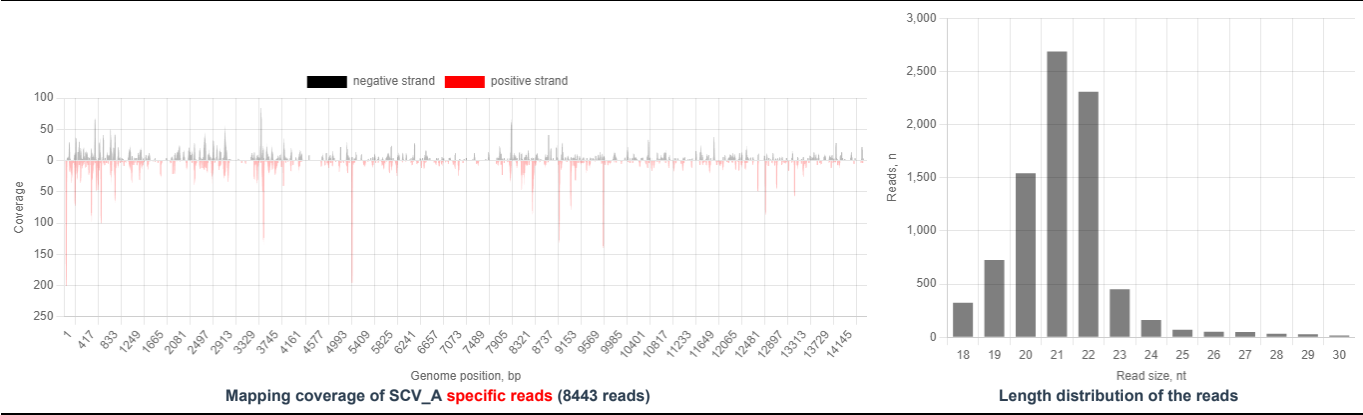

| Dataset | Input reads | Virus | Reference | Mapped reads | Mapped reads, % | RPKM | Forward/Reverse balance | Nonredundant, % | Strain specific | Strain specific, % from total mapped reads | Strain specific, RPKM |
|---------|-------------|-------|-----------|--------------|-----------------|------|-------------------------|-----------------|-----------------|--------------------------------------------|-----------------------|
| 3K_4    | 10000000    | SCV   | SCV_B     | 11607        | 0.116           | 79.7 | 0.8                     | 56.4            | 5294            | 45.6                                       | 64.9                  |



| Dataset | Input reads | Virus | Reference | Mapped reads | Mapped reads, % | RPKM | Forward/Reverse balance | Nonredundant, % | Strain specific | Strain specific, % from total mapped reads | Strain specific, RPKM |
|---------|-------------|-------|-----------|--------------|-----------------|------|-------------------------|-----------------|-----------------|--------------------------------------------|-----------------------|
|---------|-------------|-------|-----------|--------------|-----------------|------|-------------------------|-----------------|-----------------|--------------------------------------------|-----------------------|

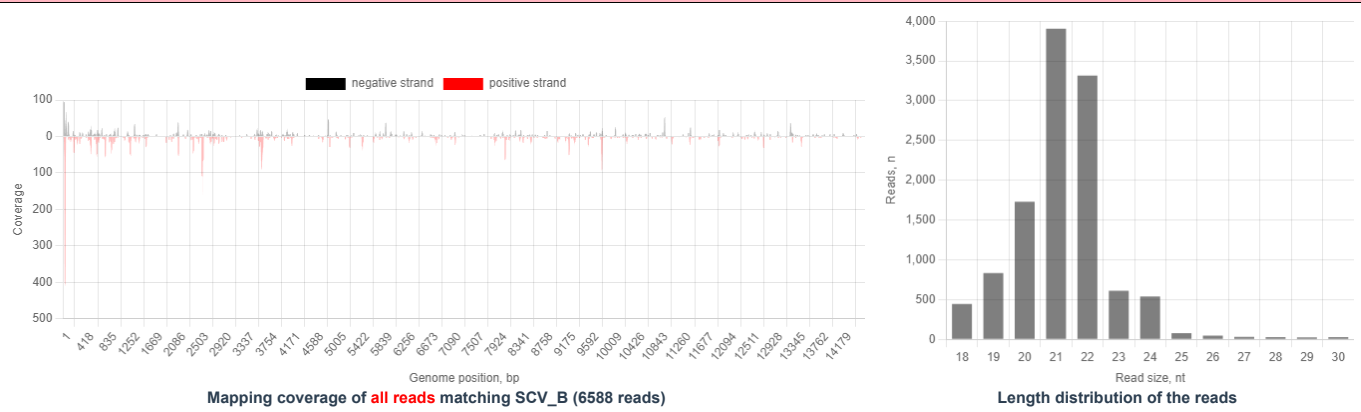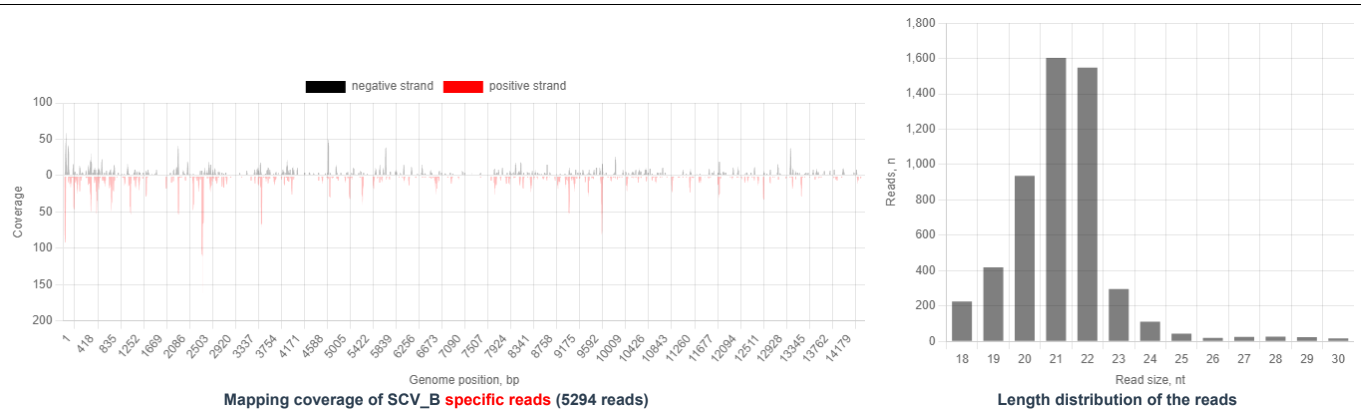

| Dataset | Input reads | Virus | Reference  | Mapped reads | Mapped reads, % | RPKM  | Forward/Reverse balance | Nonredundant, % | Strain specific | Strain specific, % from total mapped reads | Strain specific, RPKM |
|---------|-------------|-------|------------|--------------|-----------------|-------|-------------------------|-----------------|-----------------|--------------------------------------------|-----------------------|
| 3K_4    | 10000000    | SMoV  | SMoV_RNA1A | 9272         | 0.093           | 131.8 | 1.3                     | 51.5            | 4731            | 51.0                                       | 72.5                  |

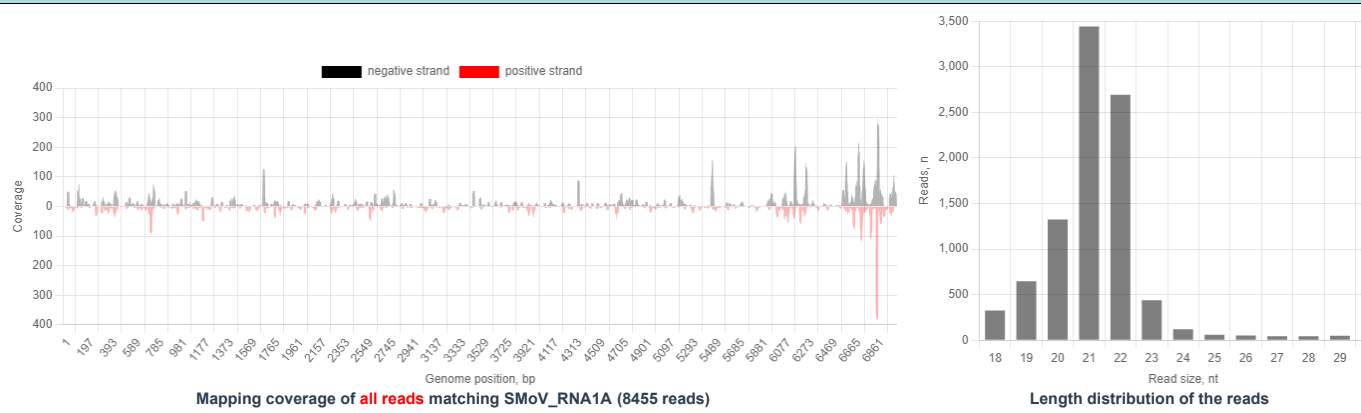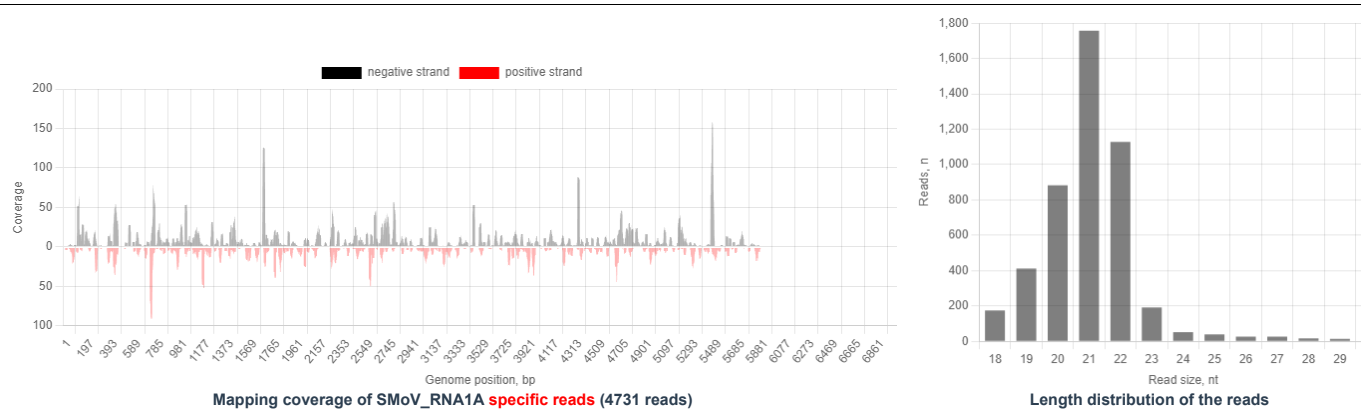

| Dataset | Input reads | Virus | Reference  | Mapped reads | Mapped reads, % | RPKM  | Forward/Reverse balance | Nonredundant, % | Strain specific | Strain specific, % from total mapped reads | Strain specific, RPKM |
|---------|-------------|-------|------------|--------------|-----------------|-------|-------------------------|-----------------|-----------------|--------------------------------------------|-----------------------|
| 3K_4    | 10000000    | SMoV  | SMoV_RNA1B | 8175         | 0.082           | 115.9 | 1.2                     | 50.3            | 3850            | 47.1                                       | 58.0                  |

| Dataset | Input reads | Virus | Reference | Mapped reads | Mapped reads, % | RPKM | Forward/Reverse balance | Nonredundant, % | Strain specific | Strain specific, % from total mapped reads | Strain specific, RPKM |
|---------|-------------|-------|-----------|--------------|-----------------|------|-------------------------|-----------------|-----------------|--------------------------------------------|-----------------------|
|---------|-------------|-------|-----------|--------------|-----------------|------|-------------------------|-----------------|-----------------|--------------------------------------------|-----------------------|

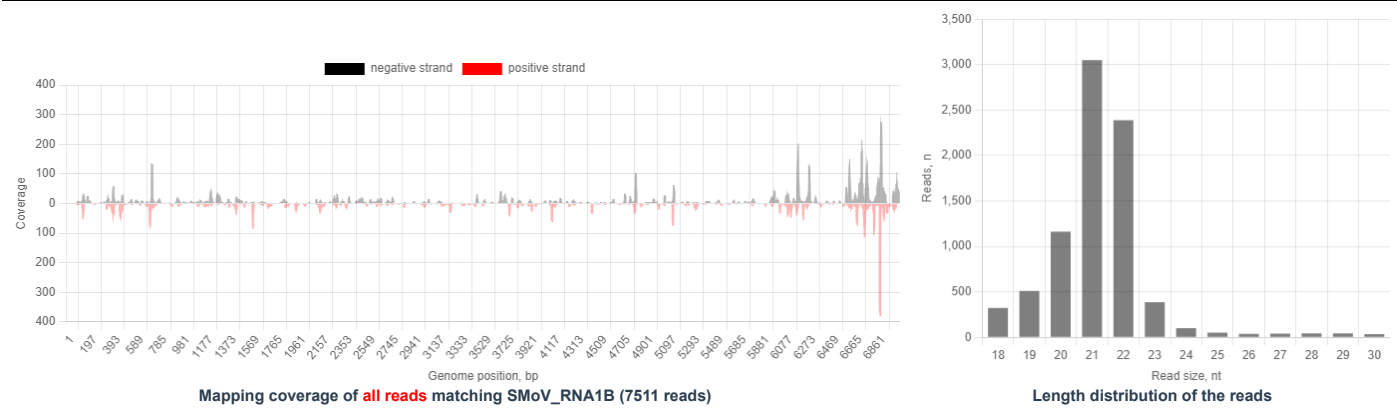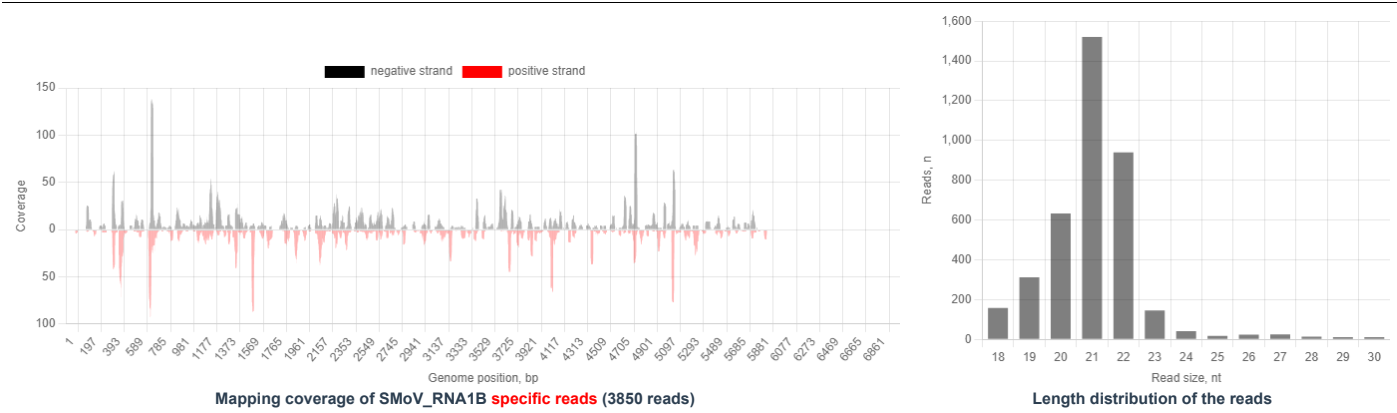

| Dataset | Input reads | Virus | Reference  | Mapped reads | Mapped reads, % | RPKM  | Forward/Reverse balance | Nonredundant, % | Strain specific | Strain specific, % from total mapped reads | Strain specific, RPKM |
|---------|-------------|-------|------------|--------------|-----------------|-------|-------------------------|-----------------|-----------------|--------------------------------------------|-----------------------|
| 3K_4    | 10000000    | SMoV  | SMoV_RNA1C | 8838         | 0.088           | 125.5 | 1.2                     | 51.1            | 4522            | 51.2                                       | 66.5                  |

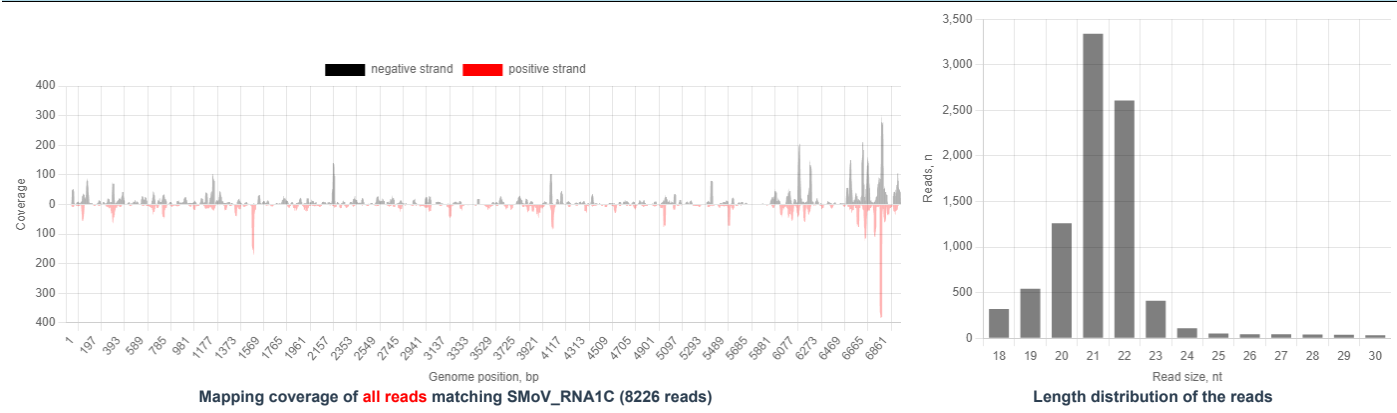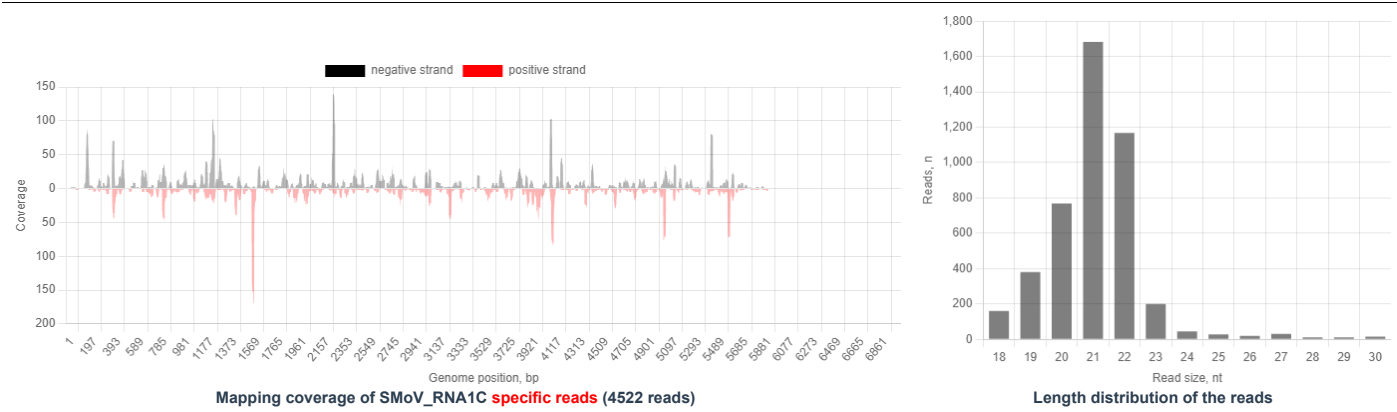

| Dataset | Input reads | Virus | Reference  | Mapped reads | Mapped reads, % | RPKM | Forward/Reverse balance | Nonredundant, % | Strain specific | Strain specific, % from total mapped reads | Strain specific, RPKM |
|---------|-------------|-------|------------|--------------|-----------------|------|-------------------------|-----------------|-----------------|--------------------------------------------|-----------------------|
| 3K_4    | 10000000    | SMoV  | SMoV_RNA2A | 5487         | 0.055           | 87.6 | 1.4                     | 56.9            | 3543            | 64.6                                       | 56.5                  |

| Dataset | Input reads | Virus | Reference | Mapped reads | Mapped reads, % | RPKM | Forward/Reverse balance | Nonredundant, % | Strain specific | Strain specific, % from total mapped reads | Strain specific, RPKM |
|---------|-------------|-------|-----------|--------------|-----------------|------|-------------------------|-----------------|-----------------|--------------------------------------------|-----------------------|
|---------|-------------|-------|-----------|--------------|-----------------|------|-------------------------|-----------------|-----------------|--------------------------------------------|-----------------------|

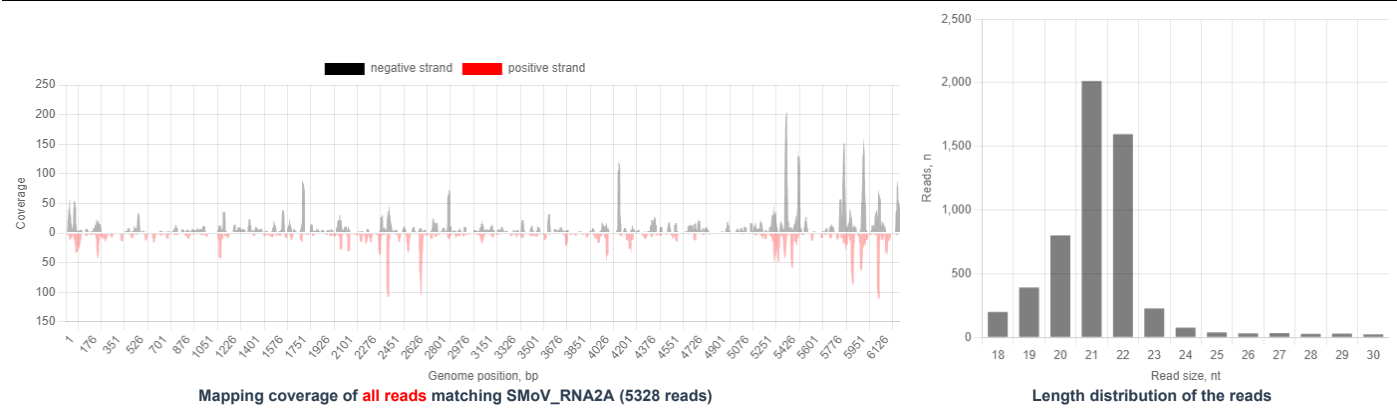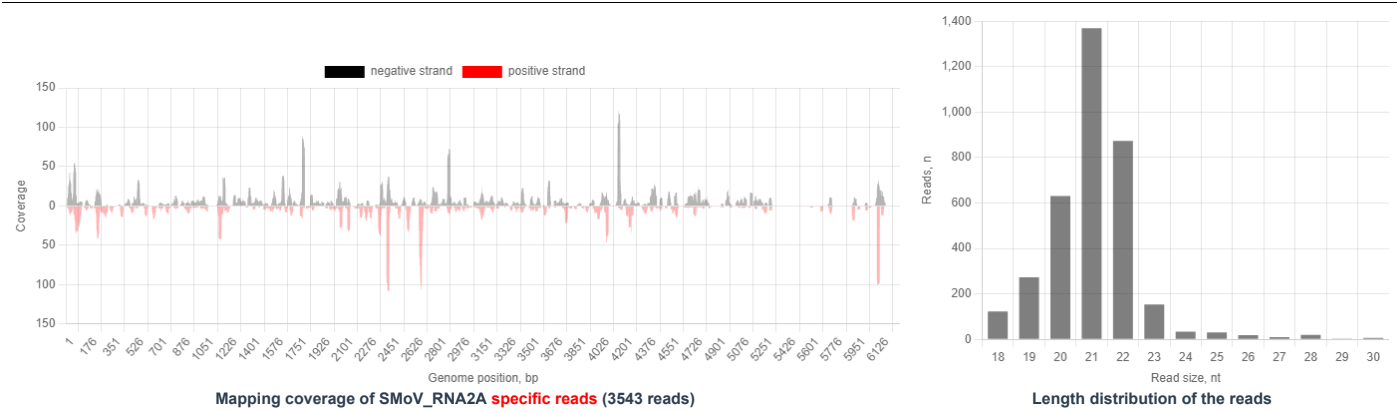

| Dataset | Input reads | Virus | Reference  | Mapped reads | Mapped reads, % | RPKM | Forward/Reverse balance | Nonredundant, % | Strain specific | Strain specific, % from total mapped reads | Strain specific, RPKM |
|---------|-------------|-------|------------|--------------|-----------------|------|-------------------------|-----------------|-----------------|--------------------------------------------|-----------------------|
| 3K_4    | 10000000    | SMoV  | SMoV_RNA2B | 4859         | 0.049           | 76.8 | 1.4                     | 59.8            | 2383            | 49.0                                       | 42.3                  |

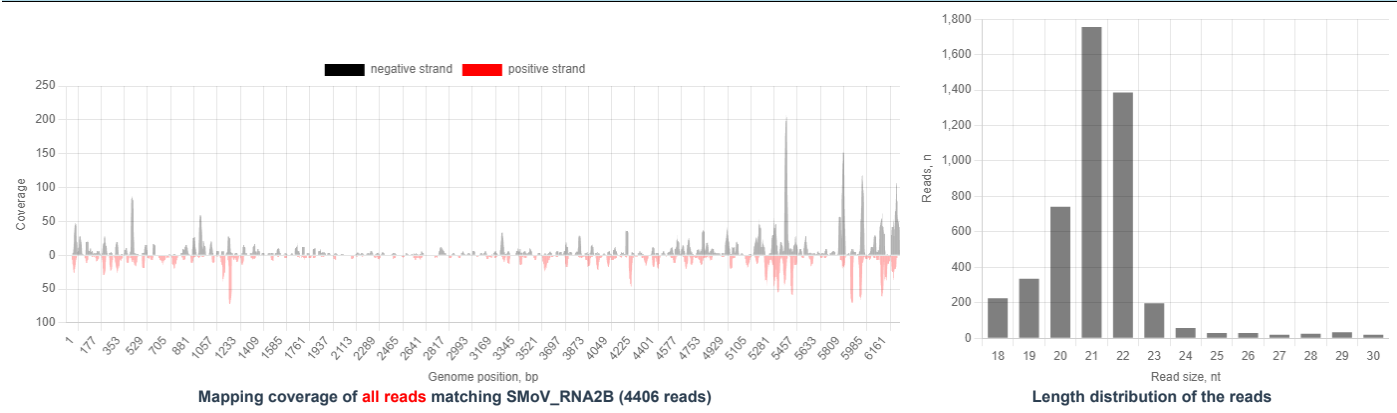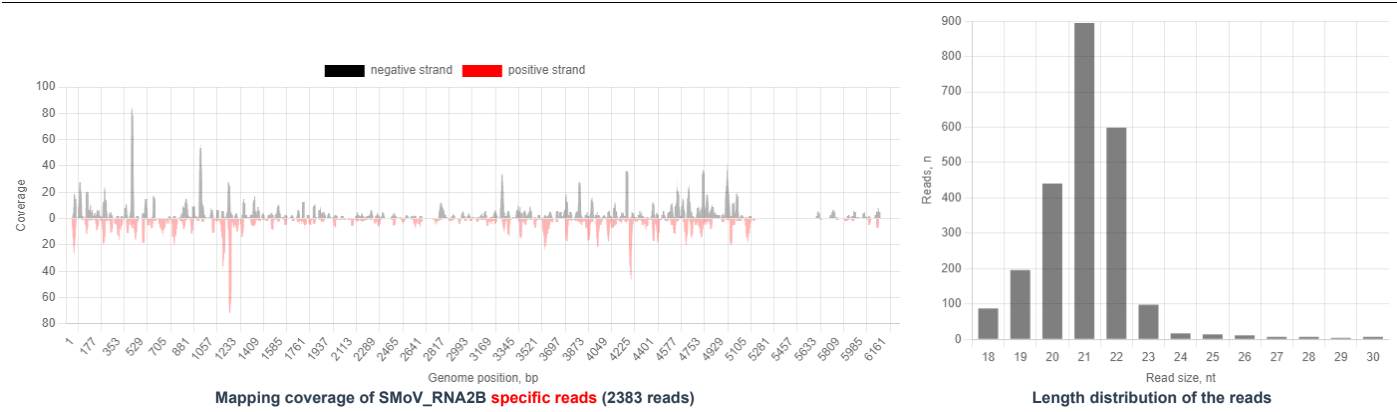

| Dataset | Input reads | Virus | Reference  | Mapped reads | Mapped reads, % | RPKM  | Forward/Reverse balance | Nonredundant, % | Strain specific | Strain specific, % from total mapped reads | Strain specific, RPKM |
|---------|-------------|-------|------------|--------------|-----------------|-------|-------------------------|-----------------|-----------------|--------------------------------------------|-----------------------|
| 3K_4    | 10000000    | SMoV  | SMoV_RNA2C | 6716         | 0.067           | 105.9 | 1.2                     | 49.5            | 2702            | 40.2                                       | 46.8                  |

| Dataset | Input reads | Virus | Reference | Mapped reads | Mapped reads, % | RPKM | Forward/Reverse balance | Nonredundant, % | Strain specific | Strain specific, % from total mapped reads | Strain specific, RPKM |
|---------|-------------|-------|-----------|--------------|-----------------|------|-------------------------|-----------------|-----------------|--------------------------------------------|-----------------------|
|---------|-------------|-------|-----------|--------------|-----------------|------|-------------------------|-----------------|-----------------|--------------------------------------------|-----------------------|

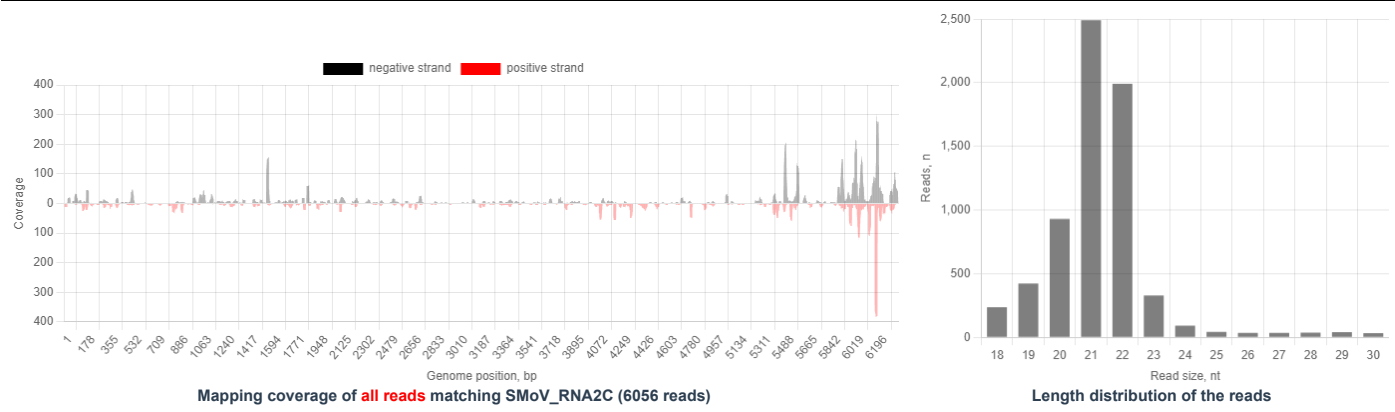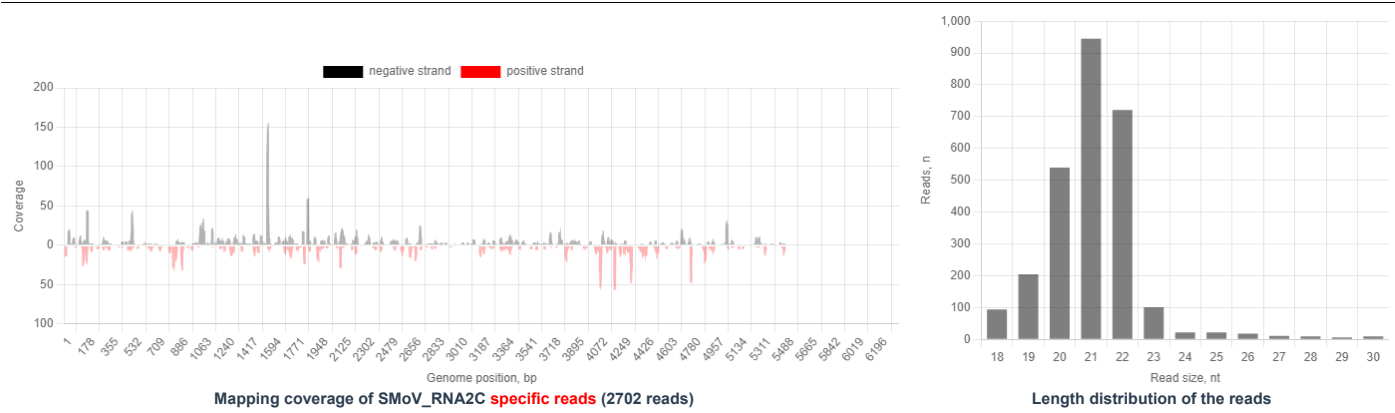

| Dataset | Input reads | Virus | Reference | Mapped reads | Mapped reads, % | RPKM | Forward/Reverse balance | Nonredundant, % | Strain specific | Strain specific, % from total mapped reads | Strain specific, RPKM |
|---------|-------------|-------|-----------|--------------|-----------------|------|-------------------------|-----------------|-----------------|--------------------------------------------|-----------------------|
| 3K_4    | 10000000    | StrV1 | StrV1_A   | 3980         | 0.040           | 28.1 | 1.0                     | 71.8            | 2149            | 54.0                                       | 22.9                  |

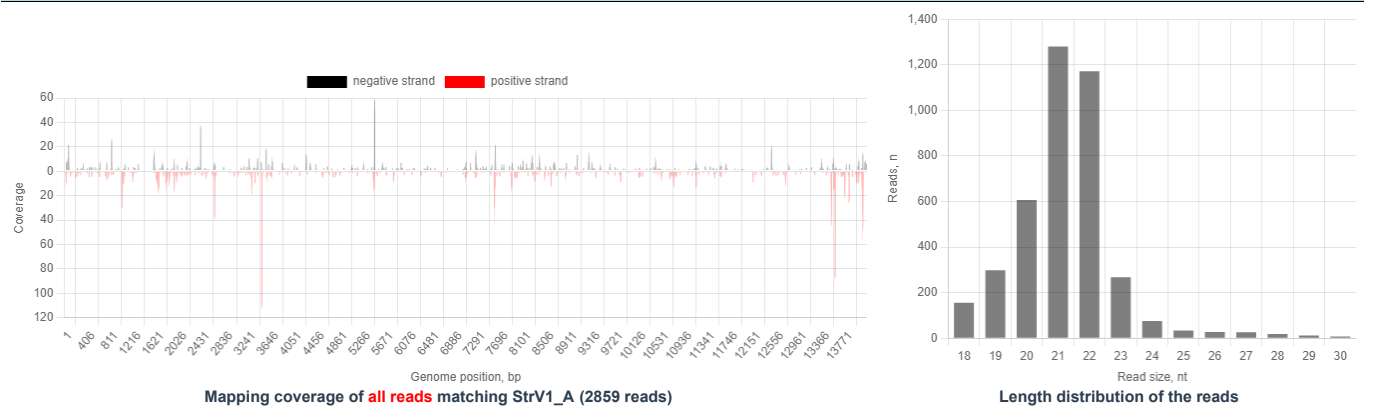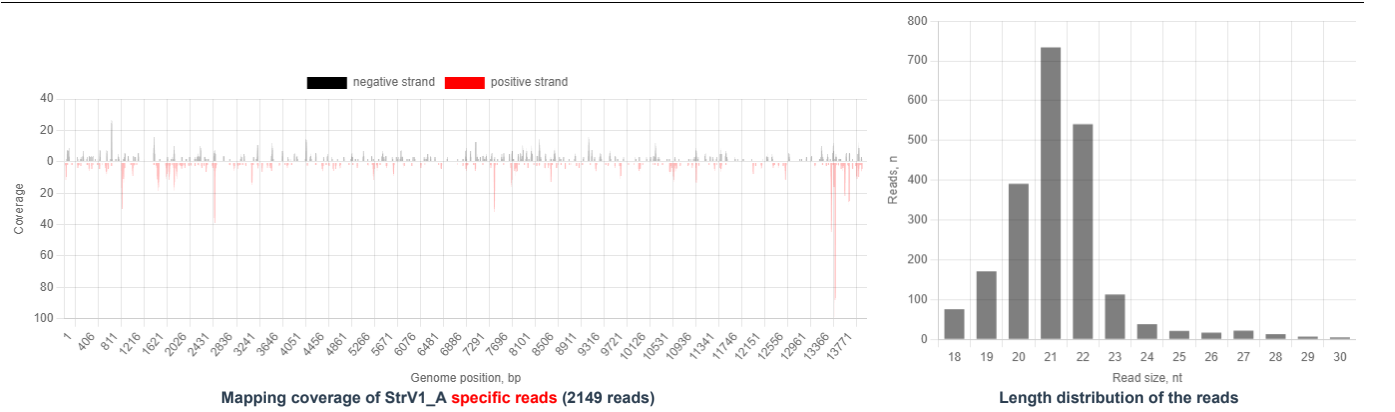

| Dataset | Input reads | Virus | Reference | Mapped reads | Mapped reads, % | RPKM | Forward/Reverse balance | Nonredundant, % | Strain specific | Strain specific, % from total mapped reads | Strain specific, RPKM |
|---------|-------------|-------|-----------|--------------|-----------------|------|-------------------------|-----------------|-----------------|--------------------------------------------|-----------------------|
| 3K_4    | 10000000    | StrV1 | StrV1_B   | 8719         | 0.087           | 62.1 | 1.4                     | 42.7            | 6971            | 80.0                                       | 59.8                  |

| Dataset | Input reads | Virus | Reference | Mapped reads | Mapped reads, % | RPKM | Forward/Reverse balance | Nonredundant, % | Strain specific | Strain specific, % from total mapped reads | Strain specific, RPKM |
|---------|-------------|-------|-----------|--------------|-----------------|------|-------------------------|-----------------|-----------------|--------------------------------------------|-----------------------|
|---------|-------------|-------|-----------|--------------|-----------------|------|-------------------------|-----------------|-----------------|--------------------------------------------|-----------------------|

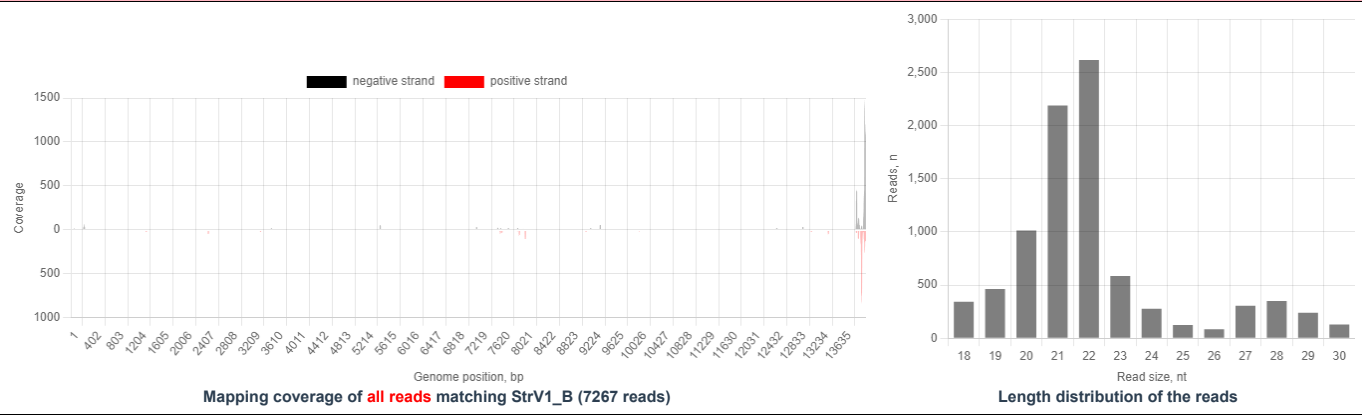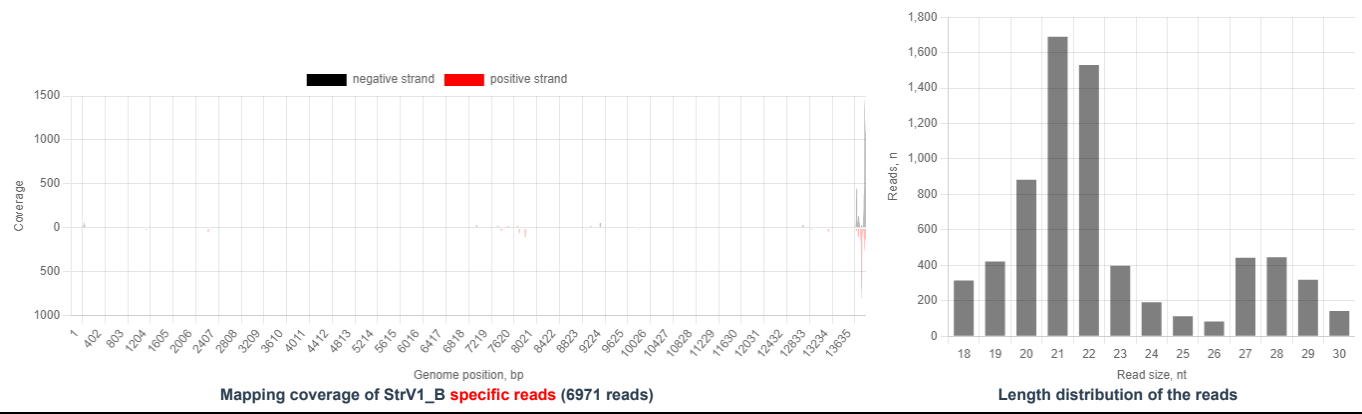

| Dataset | Input reads | Virus | Reference | Mapped reads | Mapped reads, % | RPKM | Forward/Reverse balance | Nonredundant, % | Strain specific | Strain specific, % from total mapped reads | Strain specific, RPKM |
|---------|-------------|-------|-----------|--------------|-----------------|------|-------------------------|-----------------|-----------------|--------------------------------------------|-----------------------|
| 3K_4    | 10000000    | StrV1 | StrV1_C   | 2729         | 0.027           | 19.1 | 1.1                     | 75.2            | 1721            | 63.1                                       | 14.4                  |

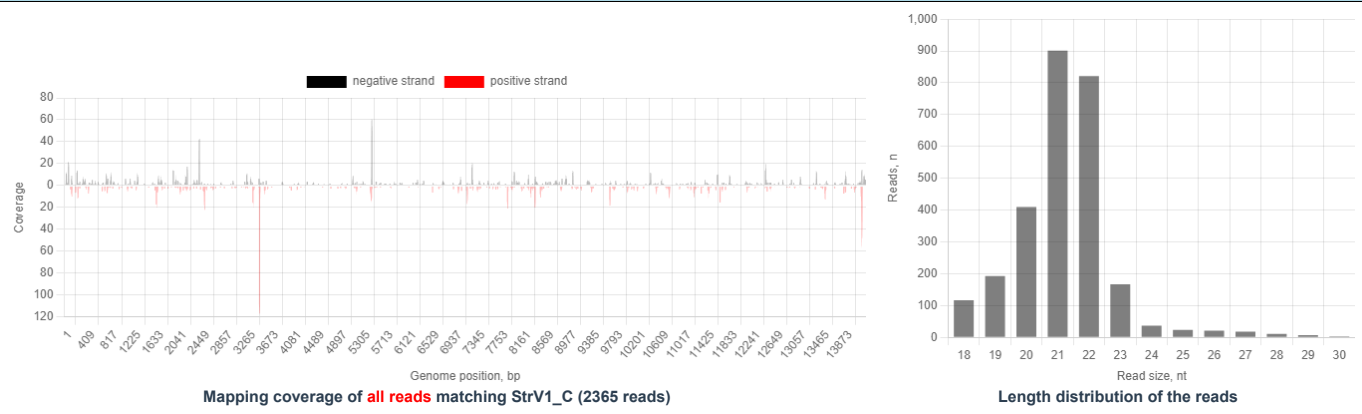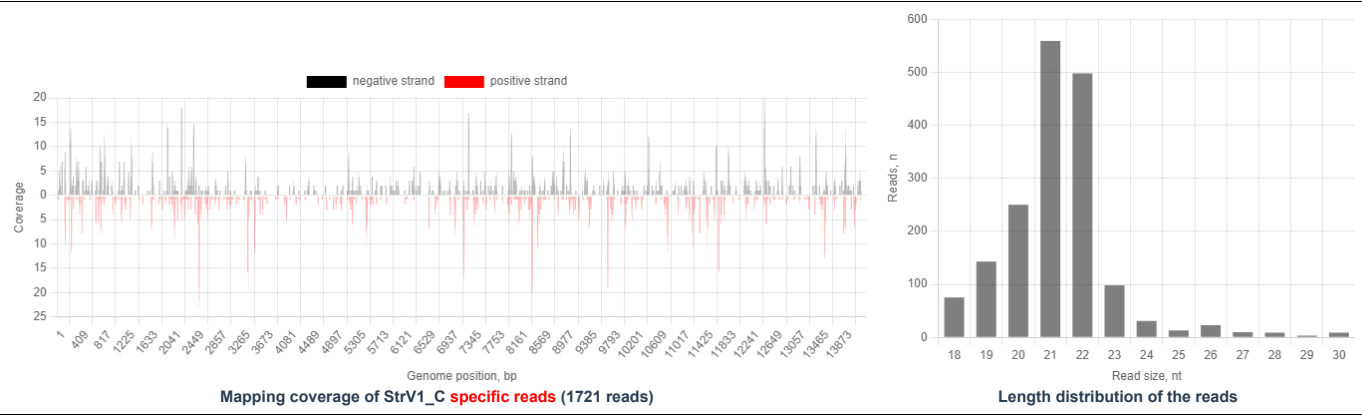

Supplement: s1 [file s1]
