# Supplementary material for: Analysis of Virus-Derived siRNAs in Strawberry Plants Co-Infected with Multiple Viruses and Their Genotypes
Source: MDPI journal article supplement (doi:10.3390/plants12132564), 2023-07-06
Supplement: s1 [file s1]

Figure S3 Mapping and distribution plots of vsiRNAs (reads) from the Fv\_StrV-1\_A, Fv\_StrV-1\_B, and Fv\_StrV-1\_AB samples.

Plant Fv\_StrV-1\_A –datasets S95, S98

Plant Fv\_StrV-1\_B –datasets S99, S107, S108

Plant Fv\_StrV-1\_AB –dataset S101

Color legends show strand specificity of the mapped reads. Axes of abscissas show genomic position in nucleotides, axes of ordinaries – sequence (mapping) coverage.

Mappings of the S101 reads against the viral references.

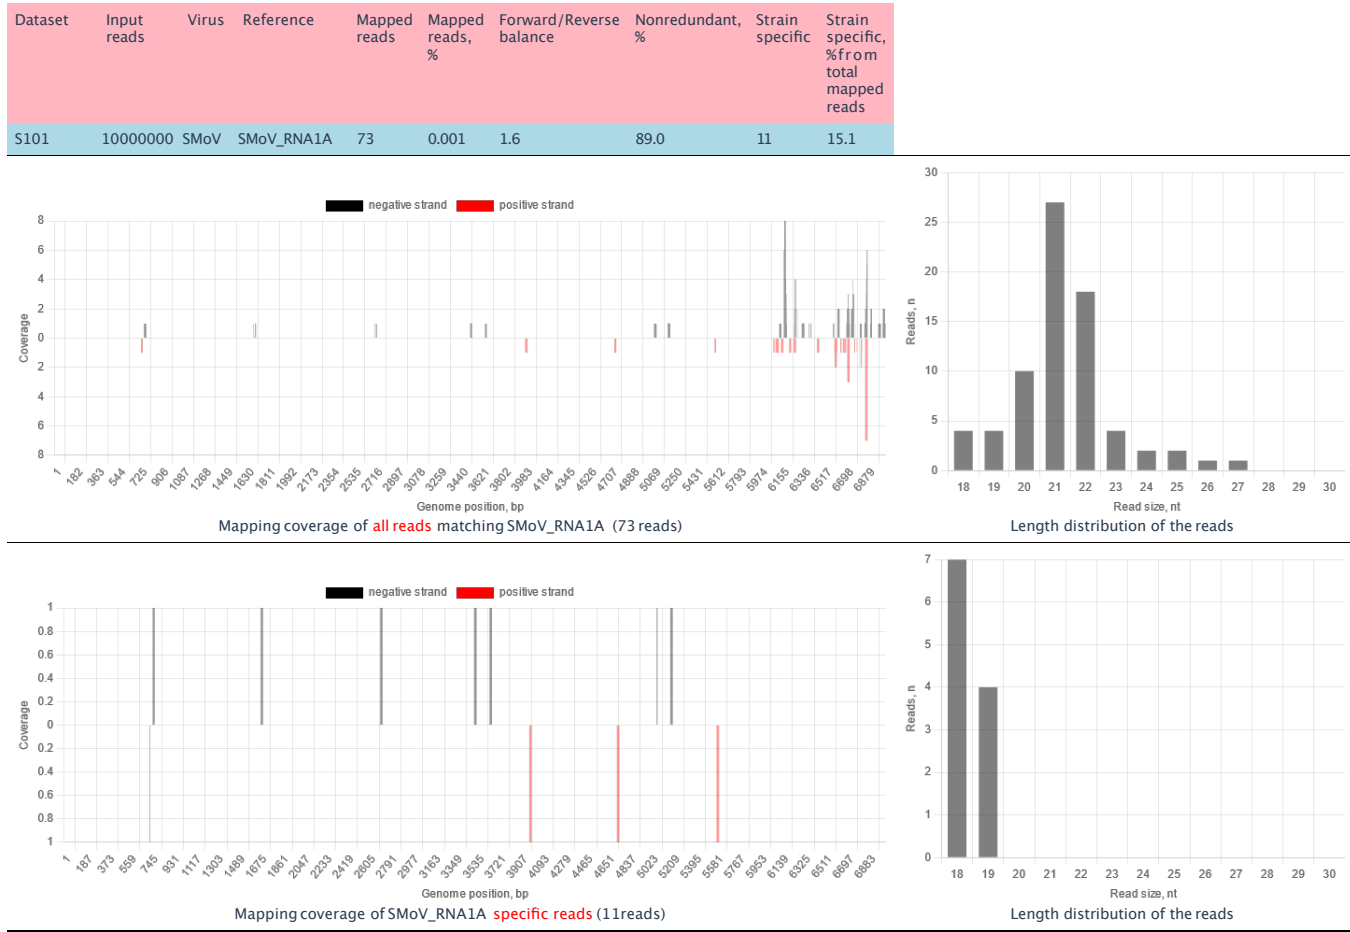

| Dataset | Input reads | Virus | Reference  | Mapped reads | Mapped reads, % | Forward/Reverse balance | Nonredundant, % | Strain specific | Strain specific, % from total mapped reads |
|---------|-------------|-------|------------|--------------|-----------------|-------------------------|-----------------|-----------------|--------------------------------------------|
| S101    | 10000000    | SMoV  | SMoV_RNA1B | 103          | 0.001           | 1.5                     | 88.3            | 39              | 37.9                                       |

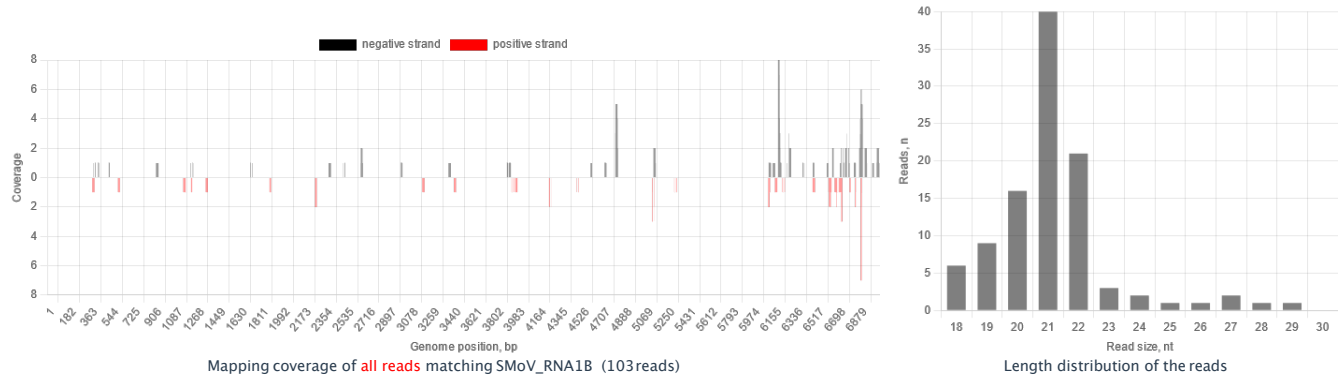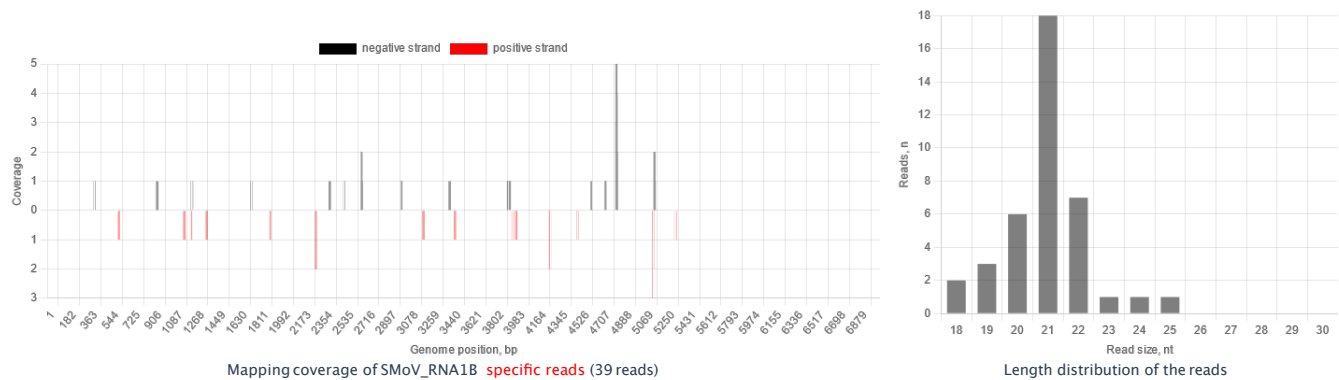

| Dataset | Input reads | Virus | Reference  | Mapped reads | Mapped reads, % | Forward/Reverse balance | Nonredundant, % | Strain specific | Strain specific, % from total mapped reads |
|---------|-------------|-------|------------|--------------|-----------------|-------------------------|-----------------|-----------------|--------------------------------------------|
| S101    | 10000000    | SMoV  | SMoV_RNA1C | 137          | 0.001           | 1.6                     | 90.5            | 73              | 53.3                                       |

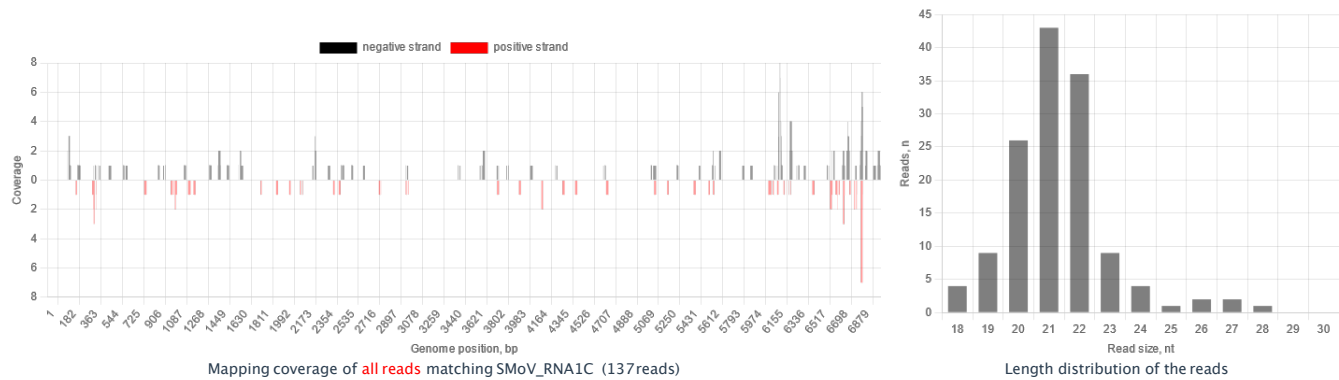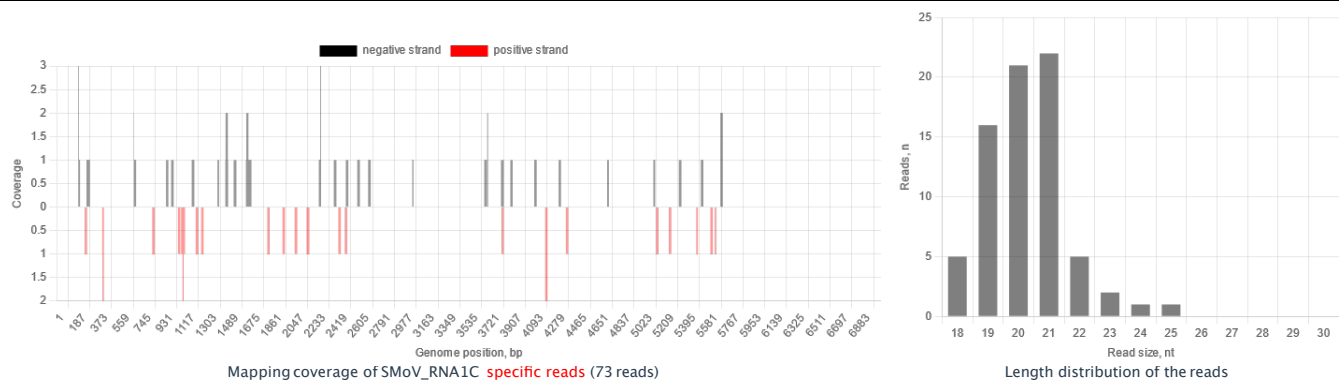

| Dataset | Input reads | Virus | Reference  | Mapped reads | Mapped reads, % | Forward/Reverse balance | Nonredundant, % | Strain specific | Strain specific, % from total mapped reads |
|---------|-------------|-------|------------|--------------|-----------------|-------------------------|-----------------|-----------------|--------------------------------------------|
| S101    | 10000000    | SMoV  | SMoV_RNA2A | 127          | 0.001           | 1.5                     | 96.9            | 87              | 68.5                                       |

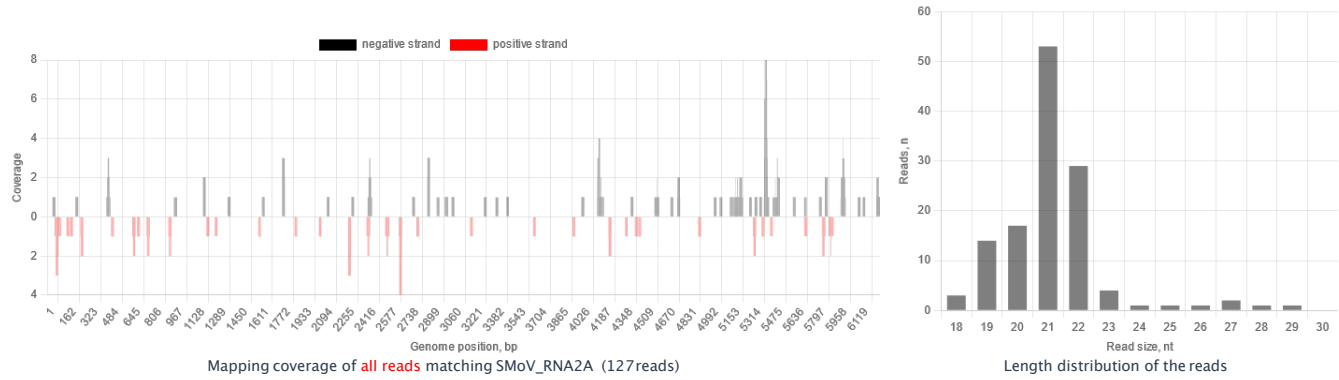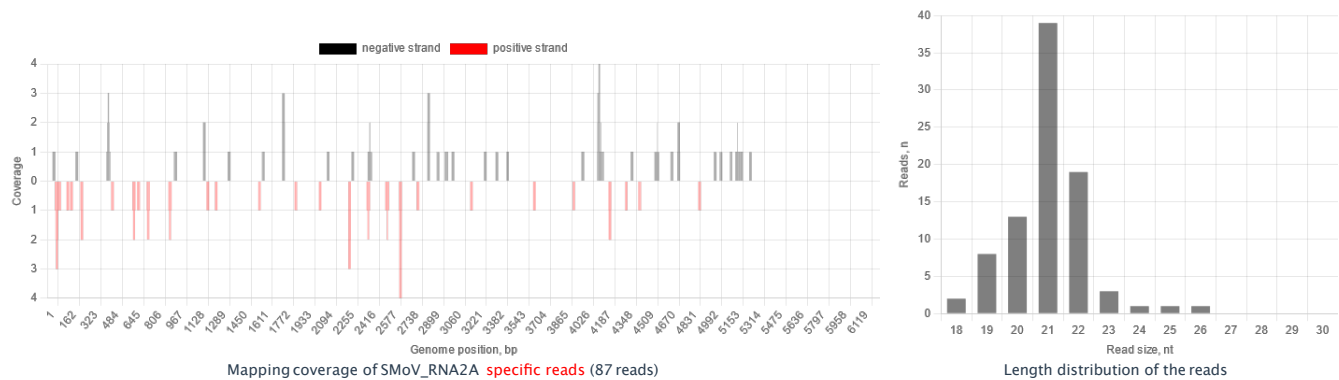

| Dataset | Input reads | Virus | Reference  | Mapped reads | Mapped reads, % | Forward/Reverse balance | Nonredundant, % | Strain specific | Strain specific, % from total mapped reads |
|---------|-------------|-------|------------|--------------|-----------------|-------------------------|-----------------|-----------------|--------------------------------------------|
| S101    | 10000000    | SMoV  | SMoV_RNA2B | 33           | 0.000           | 2.0                     | 100.0           | 0               | 0.0                                        |

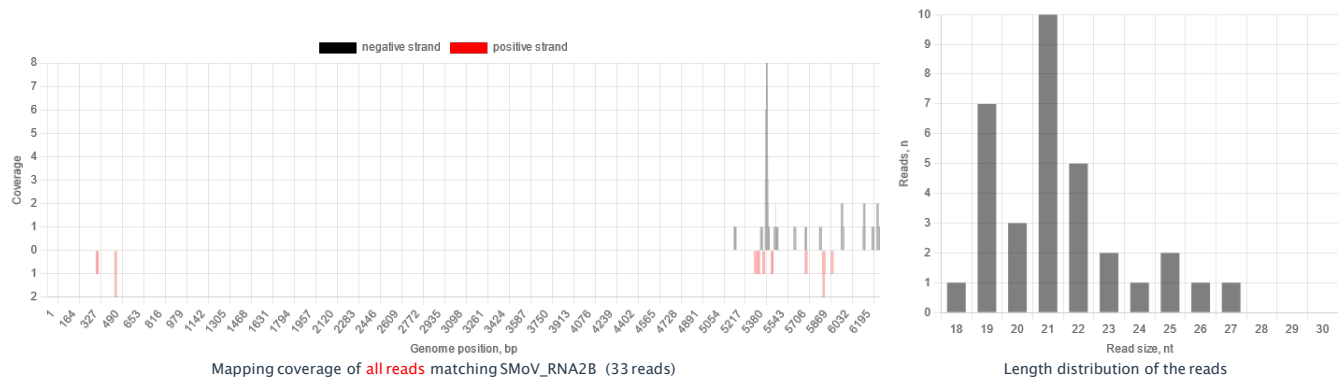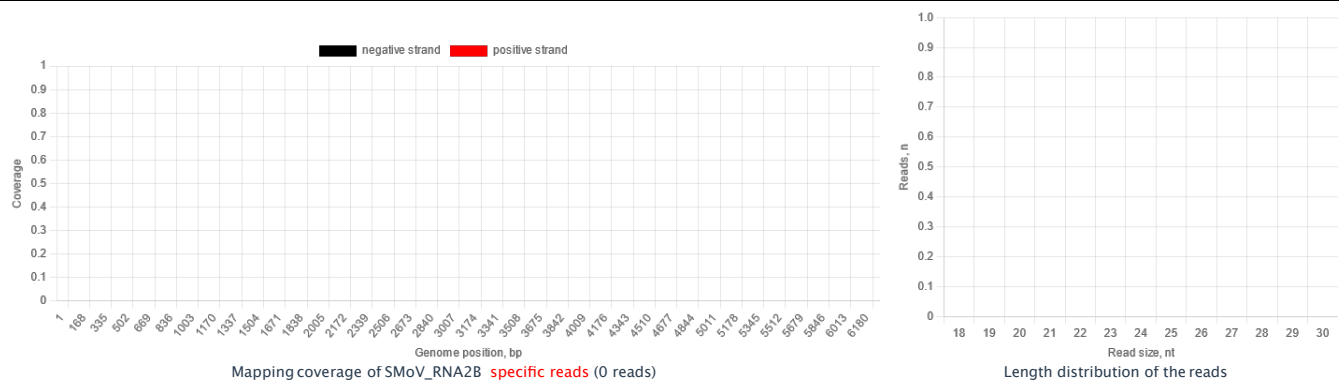

| Dataset | Input reads | Virus | Reference  | Mapped reads | Mapped reads, % | Forward/Reverse balance | Nonredundant, % | Strain specific | Strain specific, % from total mapped reads |
|---------|-------------|-------|------------|--------------|-----------------|-------------------------|-----------------|-----------------|--------------------------------------------|
| S101    | 100000000   | SMoV  | SMoV_RNA2C | 140          | 0.001           | 1.3                     | 92.1            | 76              | 54.3                                       |

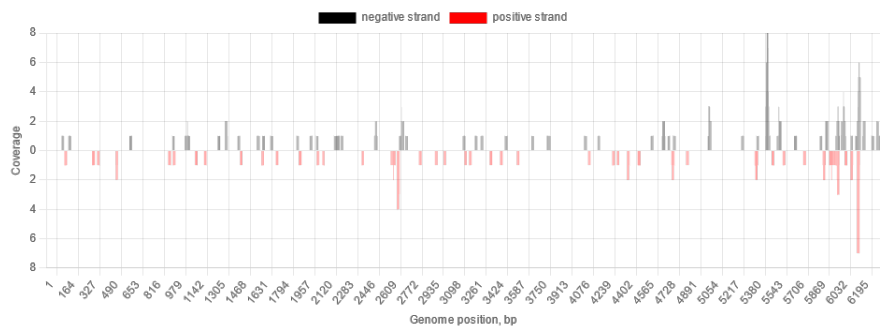

Mapping coverage of all reads matching SMoV\_RNA2C (140reads)

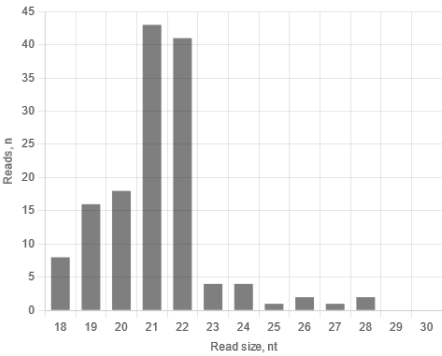

Length distribution of the reads

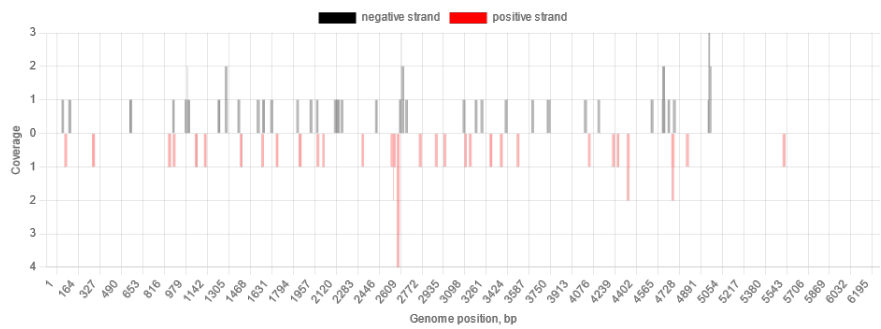

Mapping coverage of SMoV\_RNA2C specific reads (76 reads)

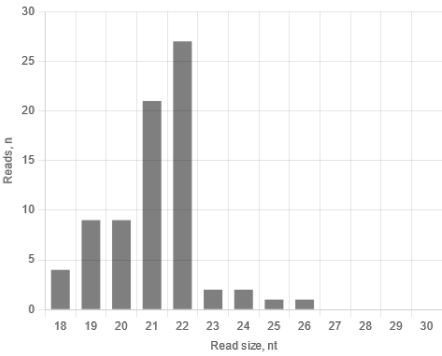

Length distribution of the reads

| Dataset | Input reads | Virus | Reference | Mapped reads | Mapped reads, % | Forward/Reverse balance | Nonredundant, % | Strain specific | Strain specific, % from total mapped reads |
|---------|-------------|-------|-----------|--------------|-----------------|-------------------------|-----------------|-----------------|--------------------------------------------|
| S101    | 100000000   | StrV1 | StrV1_A   | 13594        | 0.136           | 0.7                     | 4.8             | 11985           | 88.2                                       |

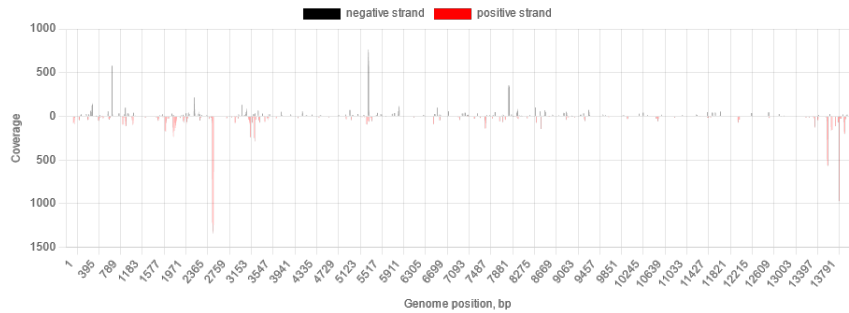

Mapping coverage of all reads matching StrV1\_A (13594reads)

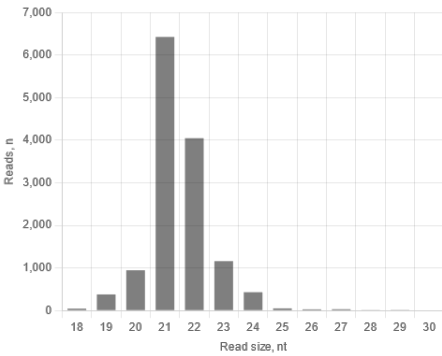

Length distribution of the reads

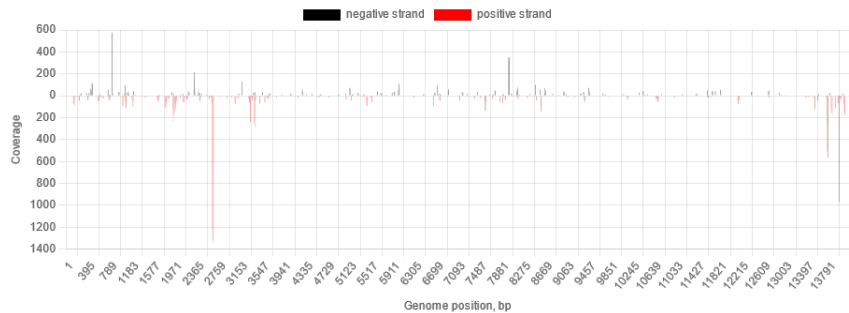

Mapping coverage of StrV1\_A specific reads (11985reads)

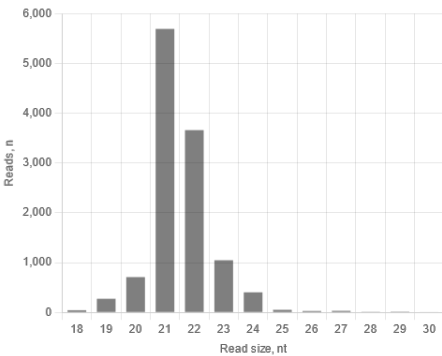

Length distribution of the reads

| Dataset | Input reads | Virus | Reference | Mapped reads | Mapped reads, % | Forward/Reverse balance | Nonredundant, % | Strain specific | Strain specific, % from total mapped reads |
|---------|-------------|-------|-----------|--------------|-----------------|-------------------------|-----------------|-----------------|--------------------------------------------|
| S101    | 100000000   | StrV1 | StrV1_B   | 14411        | 0.144           | 1.7                     | 4.7             | 13356           | 92.7                                       |

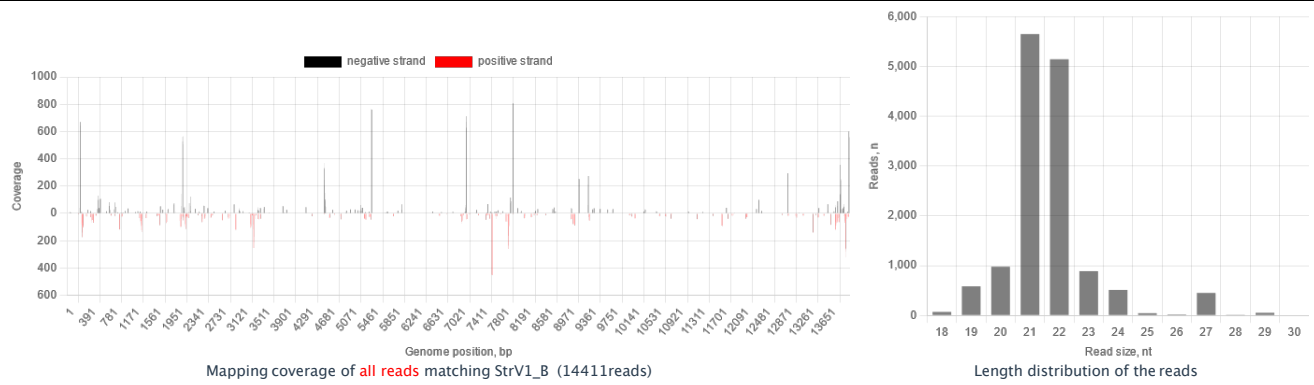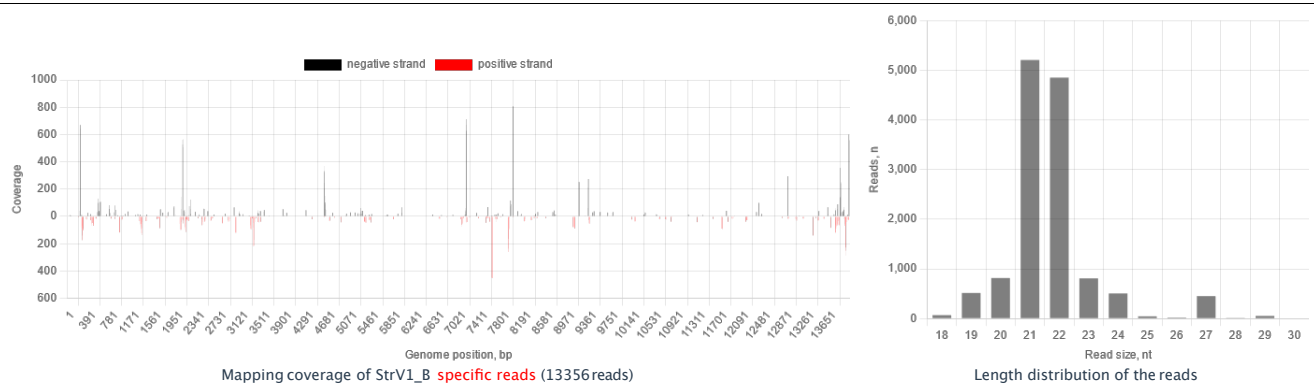

| Dataset | Input reads | Virus | Reference | Mapped reads | Mapped reads, % | Forward/Reverse balance | Nonredundant, % | Strain specific | Strain specific, % from total mapped reads |
|---------|-------------|-------|-----------|--------------|-----------------|-------------------------|-----------------|-----------------|--------------------------------------------|
| S101    | 100000000   | StrV1 | StrV1_C   | 1549         | 0.015           | 3.6                     | 5.2             | 60              | 3.9                                        |

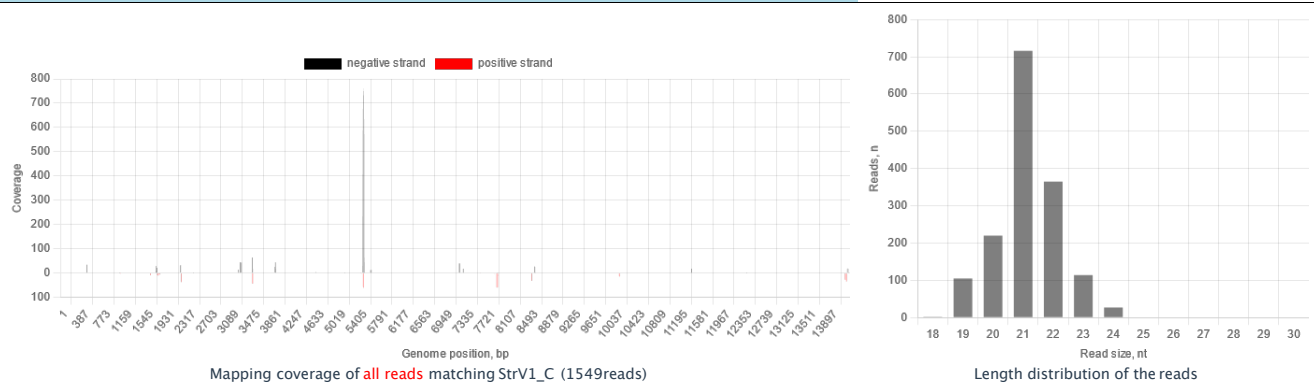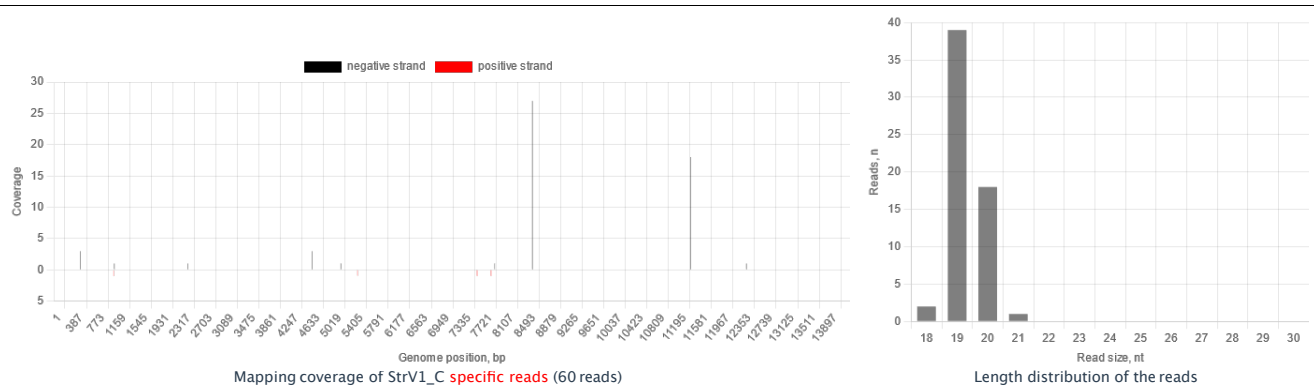

Mappings of the S107 reads against the viral references.

| Dataset | Input reads | Virus | Reference | Mapped reads | Mapped reads, % | Forward/Reverse balance | Nonredundant, % | Strain specific | Strain specific, % from total mapped reads |
|---------|-------------|-------|-----------|--------------|-----------------|-------------------------|-----------------|-----------------|--------------------------------------------|
| S107    | 10000000    | SCV   | SCV_A     | 1            | 0.000           | Infinity                | 100.0           | 11              | 1100.0                                     |

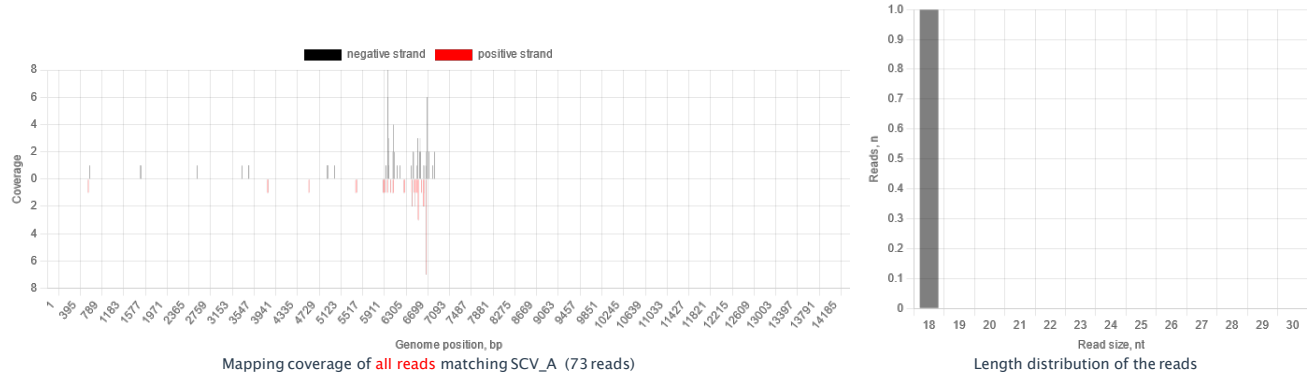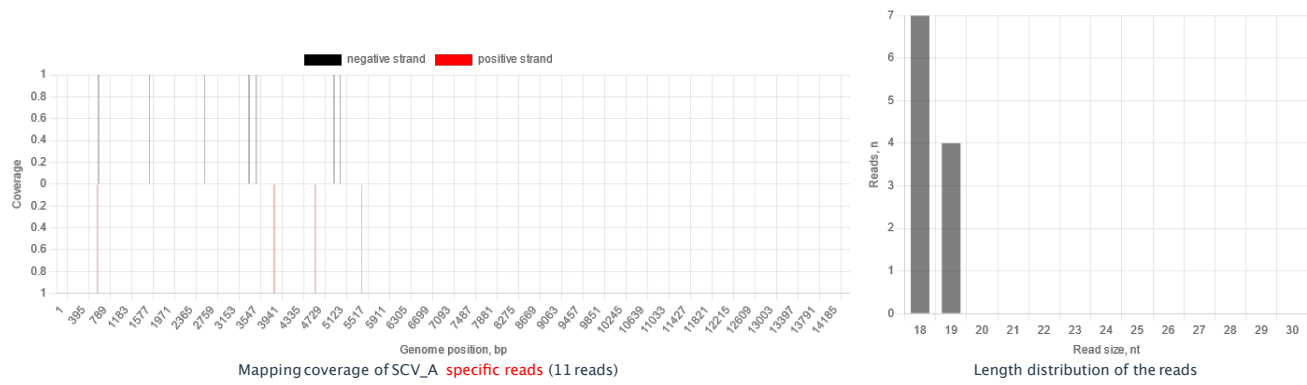

| Dataset | Input reads | Virus | Reference | Mapped reads | Mapped reads, % | Forward/Reverse balance | Nonredundant, % | Strain specific | Strain specific, % from total mapped reads |
|---------|-------------|-------|-----------|--------------|-----------------|-------------------------|-----------------|-----------------|--------------------------------------------|
| S107    | 10000000    | SCV   | SCV_B     | 2            | 0.000           | 1.0                     | 100.0           | 39              | 1950.0                                     |

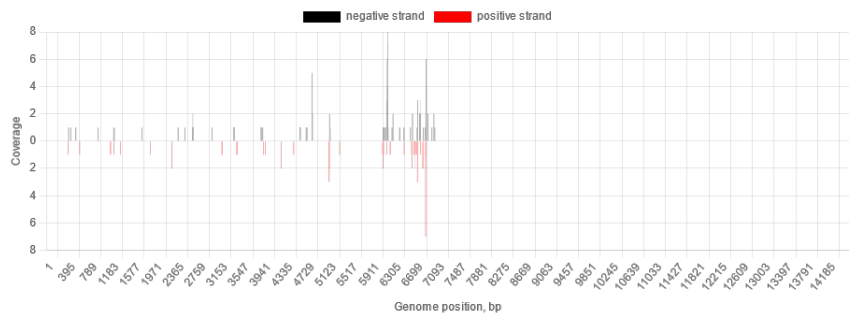

Mapping coverage of all reads matching SCV\_B (103reads)

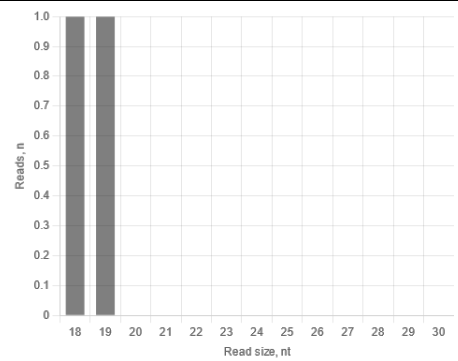

Length distribution of the reads

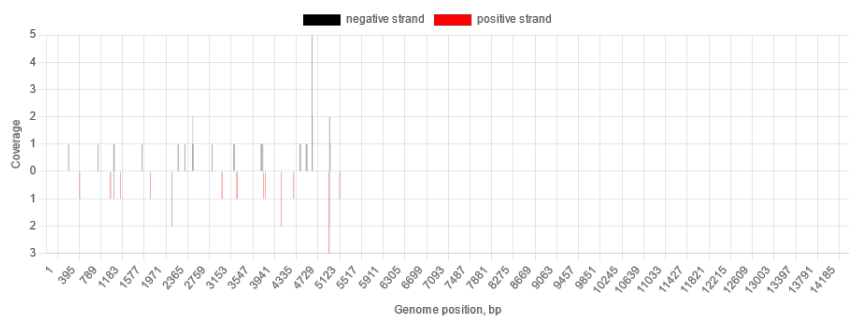

Mapping coverage of SCV\_B specific reads (39 reads)

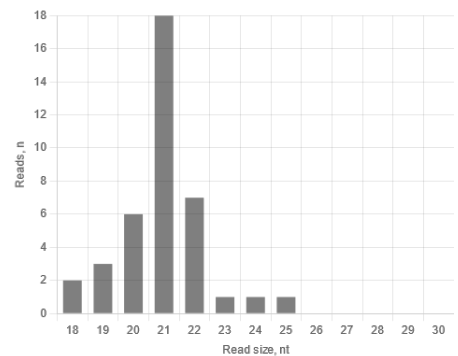

Length distribution of the reads

| Dataset | Input reads | Virus | Reference  | Mapped reads | Mapped reads, % | Forward/Reverse balance | Nonredundant, % | Strain specific | Strain specific, % from total mapped reads |
|---------|-------------|-------|------------|--------------|-----------------|-------------------------|-----------------|-----------------|--------------------------------------------|
| S107    | 10000000    | SMoV  | SMoV_RNA1A | 298          | 0.003           | 1.6                     | 82.6            | 73              | 24.5                                       |

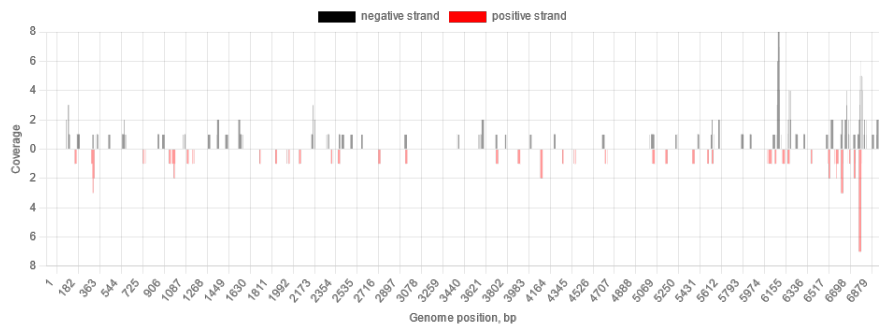

Mapping coverage of all reads matching SMoV\_RNA1A (137reads)

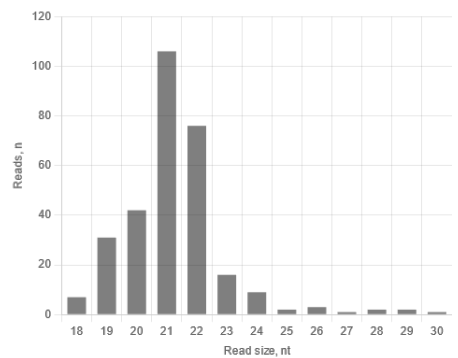

Length distribution of the reads

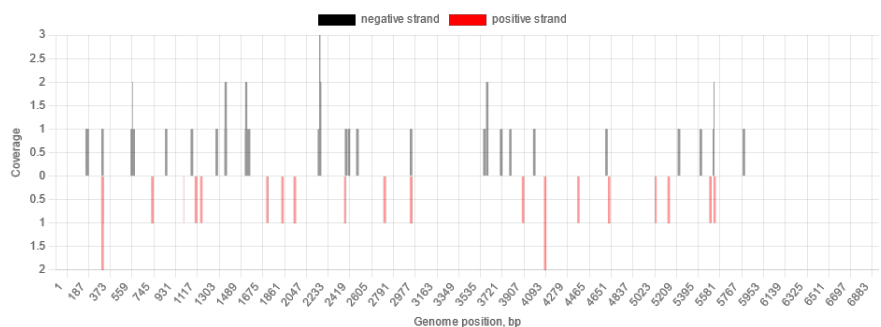

Mapping coverage of SMoV\_RNA1A specific reads (73 reads)

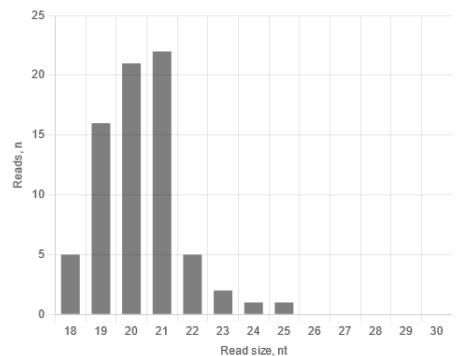

Length distribution of the reads

| Dataset | Input reads | Virus | Reference  | Mapped reads | Mapped reads, % | Forward/Reverse balance | Nonredundant, % | Strain specific | Strain specific, % from total mapped reads |
|---------|-------------|-------|------------|--------------|-----------------|-------------------------|-----------------|-----------------|--------------------------------------------|
| S107    | 100000000   | SMoV  | SMoV_RNA1B | 206          | 0.002           | 1.4                     | 79.1            | 87              | 42.2                                       |

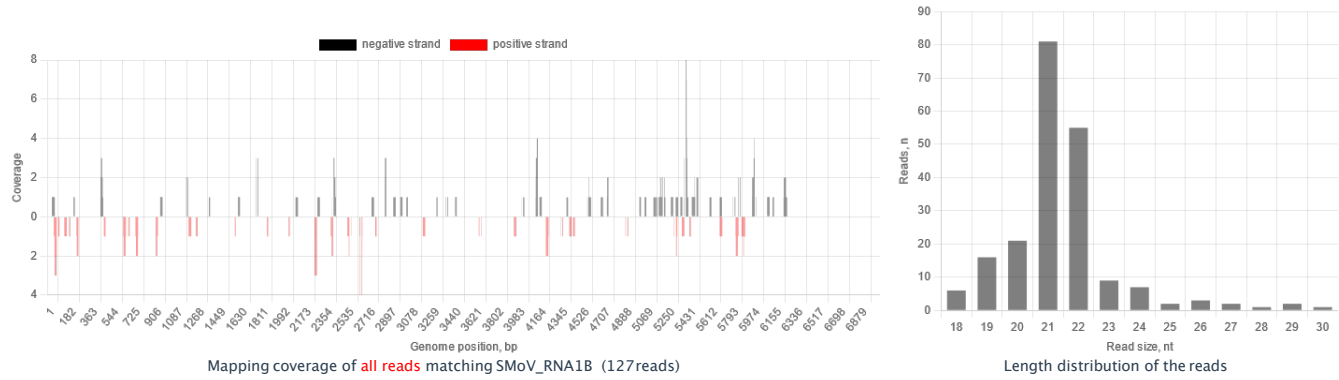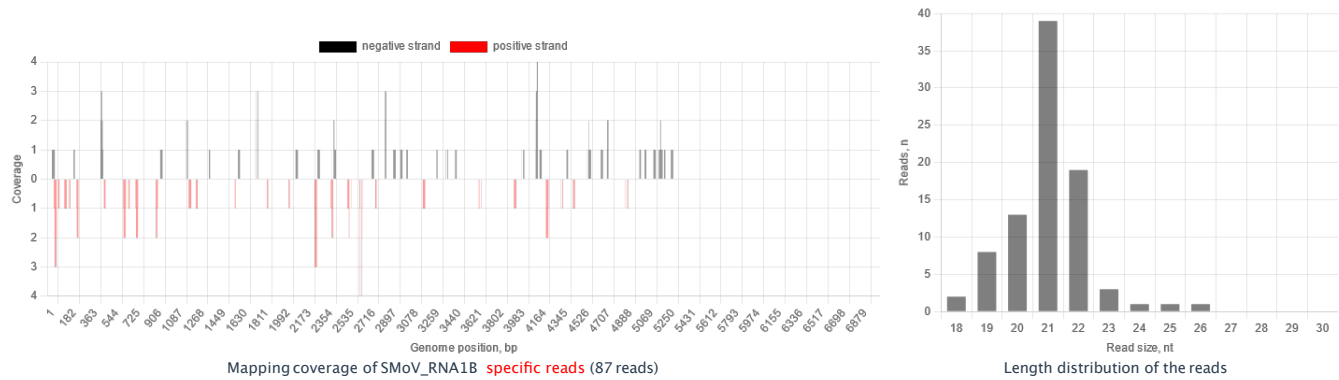

| Dataset | Input reads | Virus | Reference  | Mapped reads | Mapped reads, % | Forward/Reverse balance | Nonredundant, % | Strain specific | Strain specific, % from total mapped reads |
|---------|-------------|-------|------------|--------------|-----------------|-------------------------|-----------------|-----------------|--------------------------------------------|
| S107    | 100000000   | SMoV  | SMoV_RNA1C | 404          | 0.004           | 1.5                     | 83.9            | 0               | 0.0                                        |

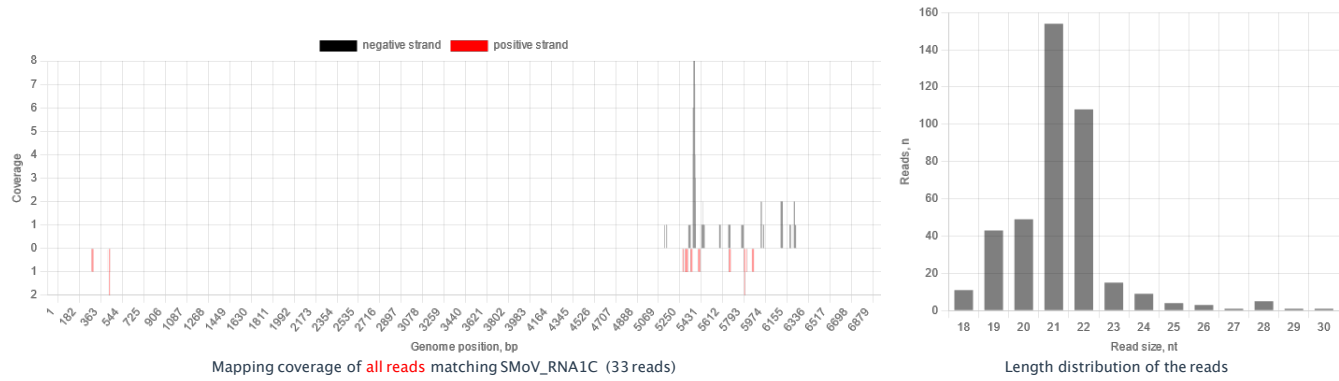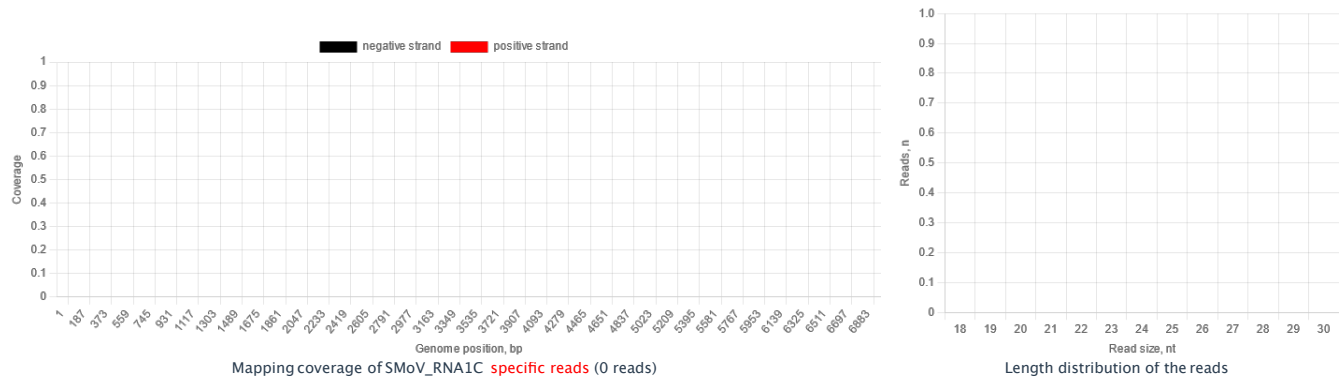



| Dataset | Input reads | Virus | Reference  | Mapped reads | Mapped reads, % | Forward/Reverse balance | Nonredundant, % | Strain specific | Strain specific, % from total mapped reads |
|---------|-------------|-------|------------|--------------|-----------------|-------------------------|-----------------|-----------------|--------------------------------------------|
| S107    | 10000000.   | SMoV  | SMoV_RNA2A | 319          | 0.003           | 1.3                     | 85.0            | 76              | 23.8                                       |

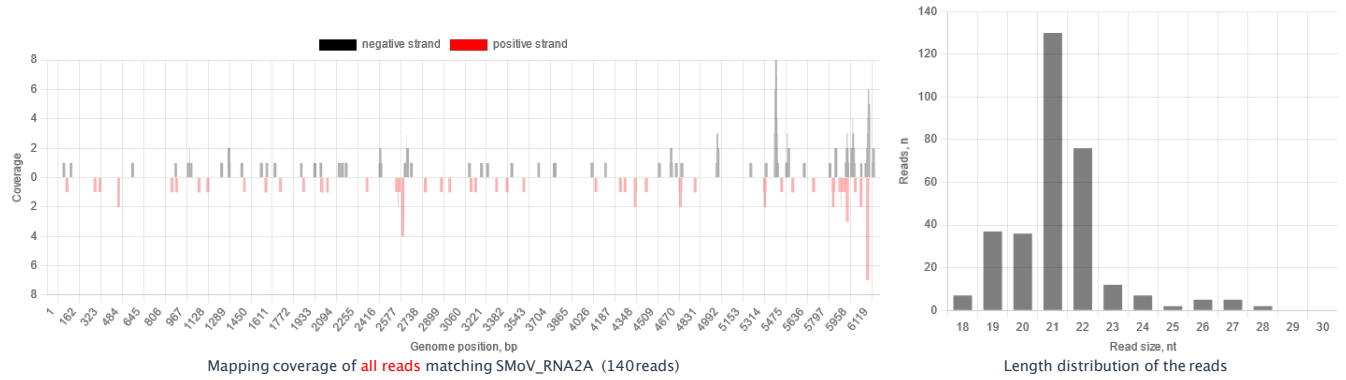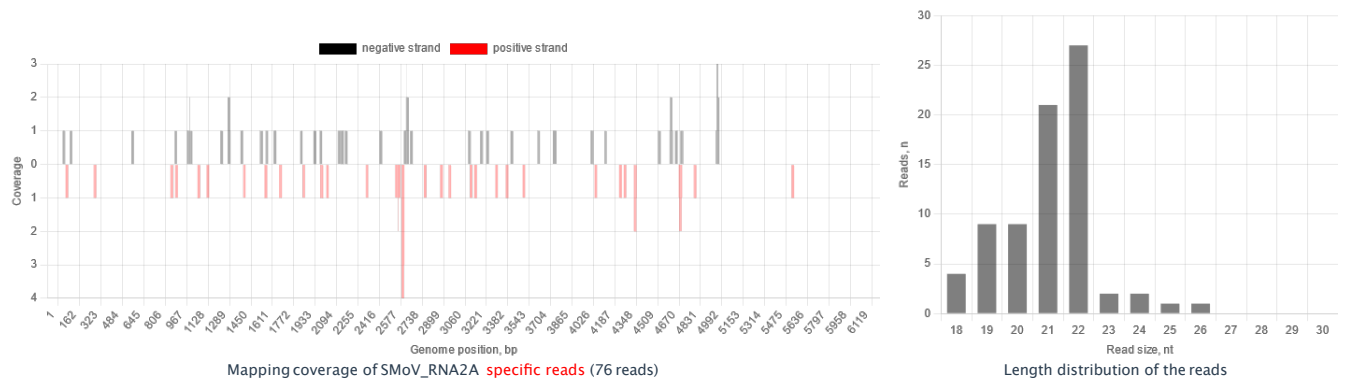

| Dataset | Input reads | Virus | Reference  | Mapped reads | Mapped reads, % | Forward/Reverse balance | Nonredundant, % | Strain specific | Strain specific, % from total mapped reads |
|---------|-------------|-------|------------|--------------|-----------------|-------------------------|-----------------|-----------------|--------------------------------------------|
| S107    | 10000000.   | SMoV  | SMoV_RNA2B | 124          | 0.001           | 1.8                     | 89.5            | 11985           | 9665.3                                     |

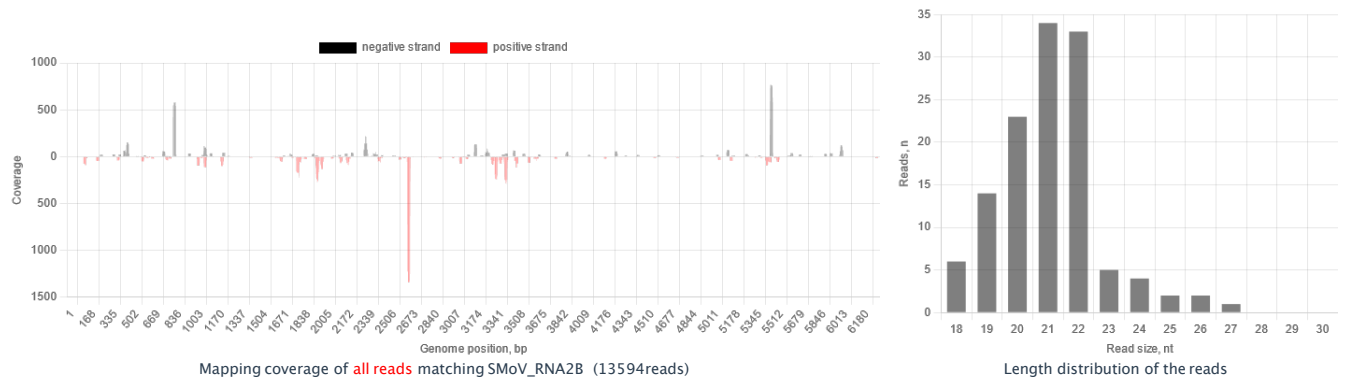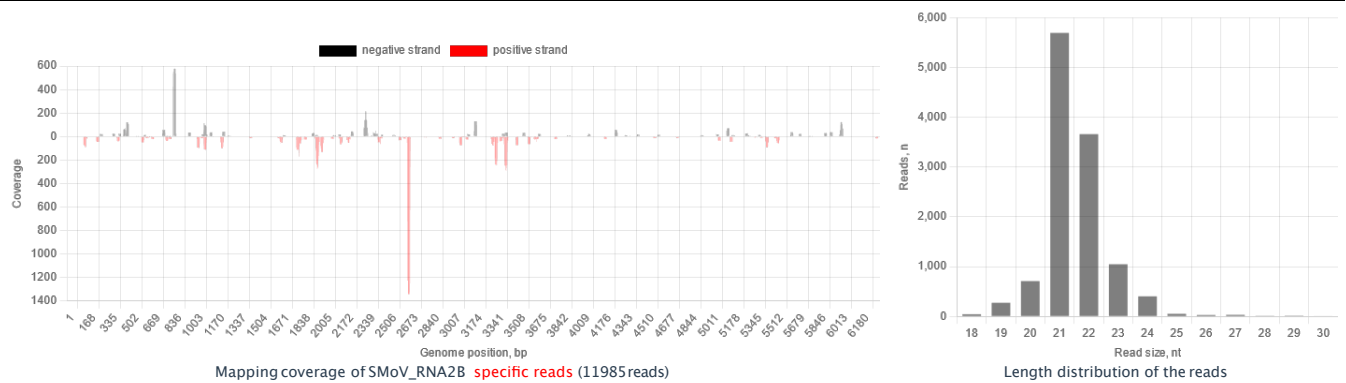

| Dataset | Input reads | Virus | Reference  | Mapped reads | Mapped reads, % | Forward/Reverse balance | Nonredundant, % | Strain specific | Strain specific, % from total mapped reads |
|---------|-------------|-------|------------|--------------|-----------------|-------------------------|-----------------|-----------------|--------------------------------------------|
| S107    | 10000000    | SMoV  | SMoV_RNA2C | 373          | 0.004           | 1.6                     | 81.0            | 13356           | 3580.7                                     |

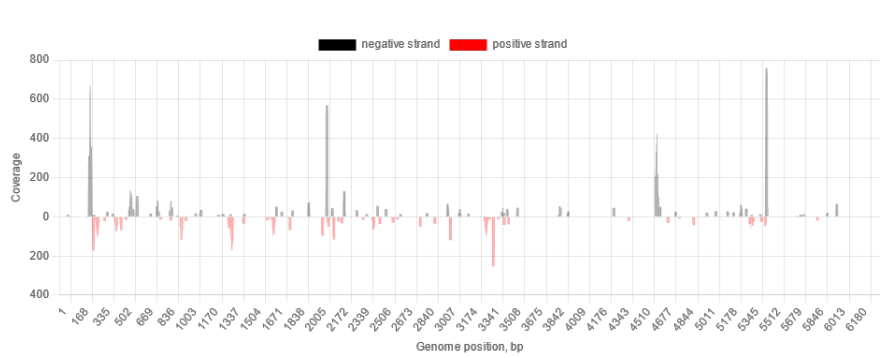

Mapping coverage of **all reads** matching SMoV\_RNA2C (14411reads)

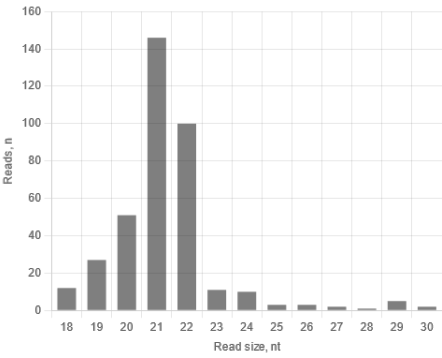

Length distribution of the reads

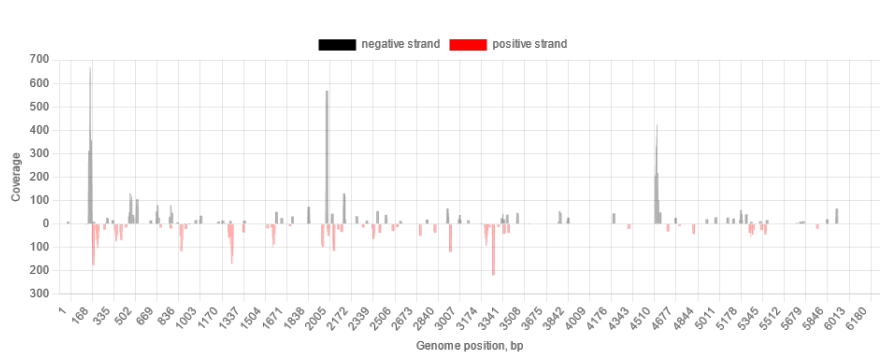

Mapping coverage of SMoV\_RNA2C **specific reads** (13356 reads)

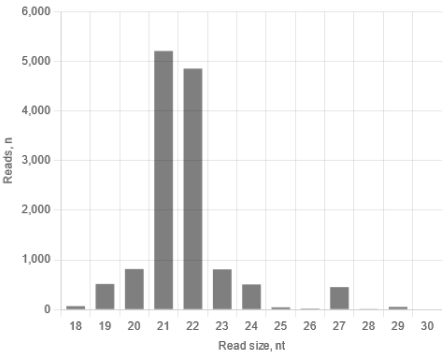

Length distribution of the reads

| Dataset | Input reads | Virus | Reference | Mapped reads | Mapped reads, % | Forward/Reverse balance | Nonredundant, % | Strain specific | Strain specific, % from total mapped reads |
|---------|-------------|-------|-----------|--------------|-----------------|-------------------------|-----------------|-----------------|--------------------------------------------|
| S107    | 10000000    | StrV1 | StrV1_A   | 256          | 0.003           | 1.1                     | 35.9            | 60              | 23.4                                       |

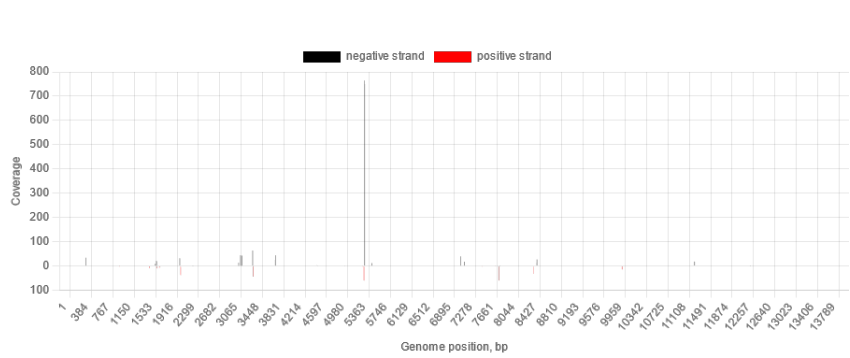

Mapping coverage of **all reads** matching StrV1\_A (1549reads)

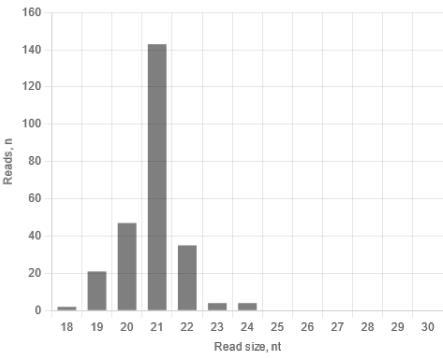

Length distribution of the reads

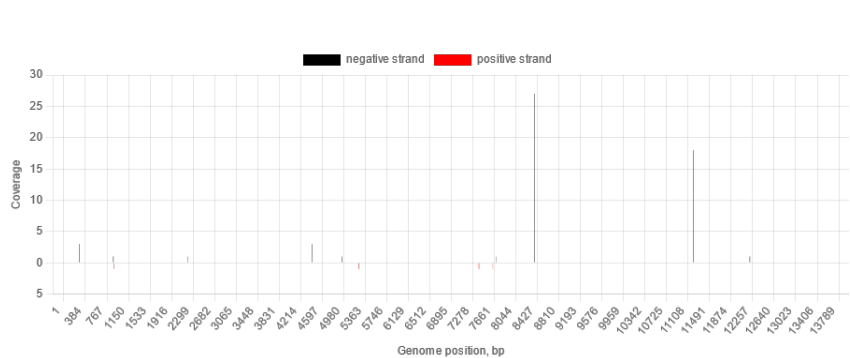

Mapping coverage of StrV1\_A **specific reads** (60 reads)

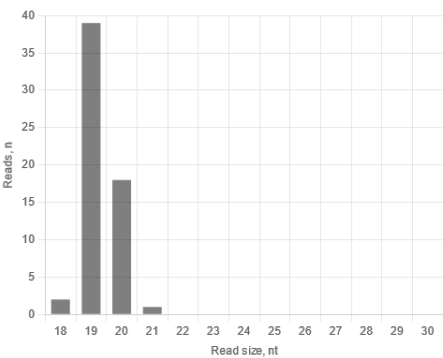

Length distribution of the reads

| Dataset | Input reads | Virus | Reference | Mapped reads | Mapped reads, % | Forward/Reverse balance | Nonredundant, % | Strain specific | Strain specific, % from total mapped reads |
|---------|-------------|-------|-----------|--------------|-----------------|-------------------------|-----------------|-----------------|--------------------------------------------|
| S107    | 10000000    | StrV1 | StrV1_B   | 13321        | 0.133           | 2.2                     | 35.7            | 1               | 0.0                                        |

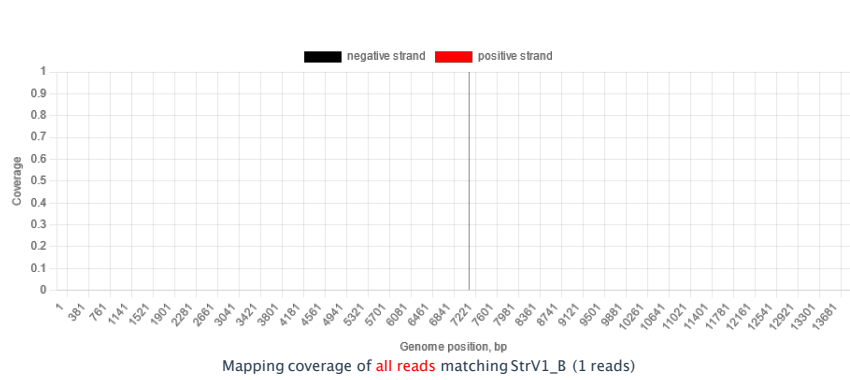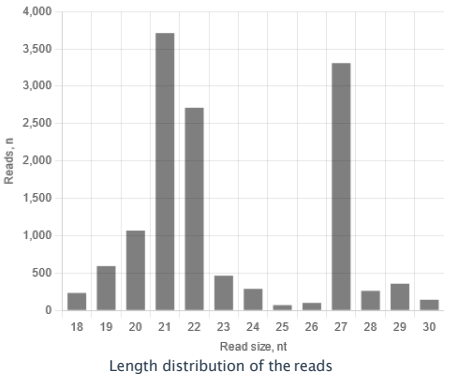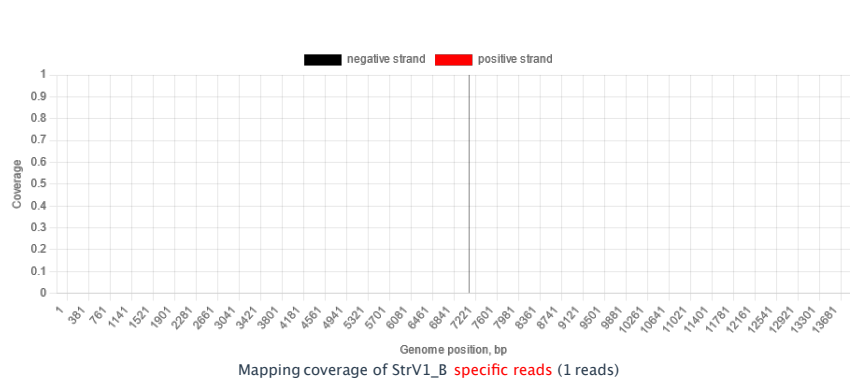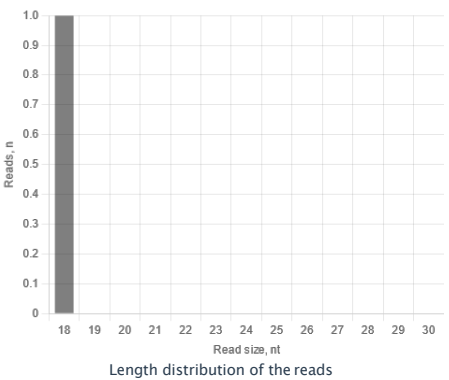

| Dataset | Input reads | Virus | Reference | Mapped reads | Mapped reads, % | Forward/Reverse balance | Nonredundant, % | Strain specific | Strain specific, % from total mapped reads |
|---------|-------------|-------|-----------|--------------|-----------------|-------------------------|-----------------|-----------------|--------------------------------------------|
| S107    | 10000000    | StrV1 | StrV1_C   | 178          | 0.002           | 1.3                     | 42.1            | 2               | 1.1                                        |

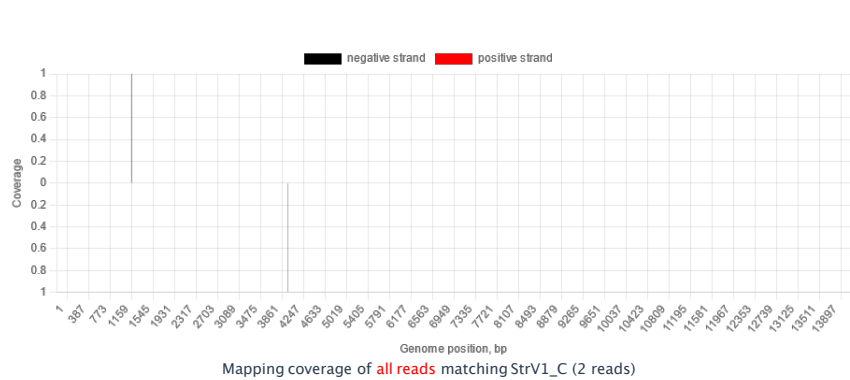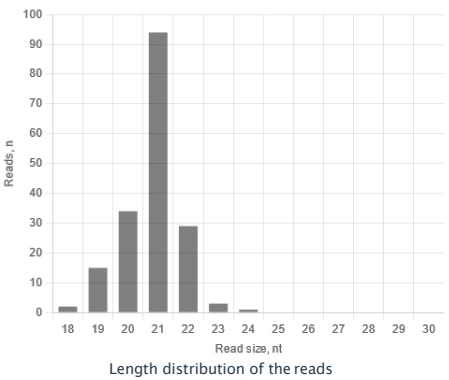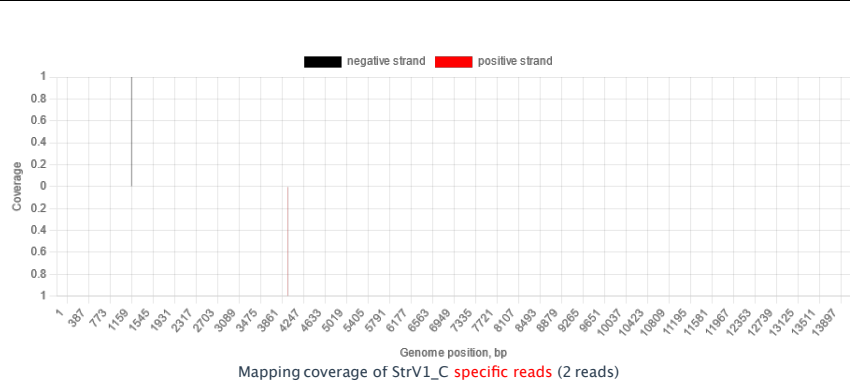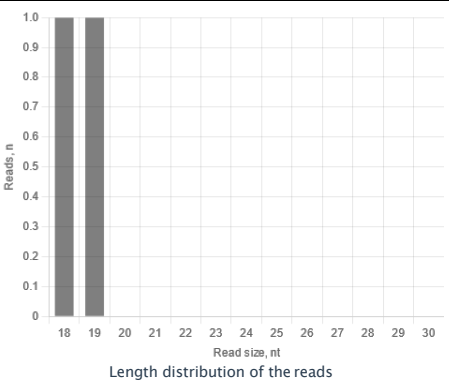

Mappings of the S108 reads against the viral references.

| Dataset | Input reads | Virus | Reference | Mapped reads | Mapped reads, % | Forward/Reverse balance | Nonredundant, % | Strain specific | Strain specific, % from total mapped reads |
|---------|-------------|-------|-----------|--------------|-----------------|-------------------------|-----------------|-----------------|--------------------------------------------|
| S108    | 10000000    | SCV   | SCV_A     | 1            | 0.000           | Infinity                | 100.0           | 11              | 1100.0                                     |

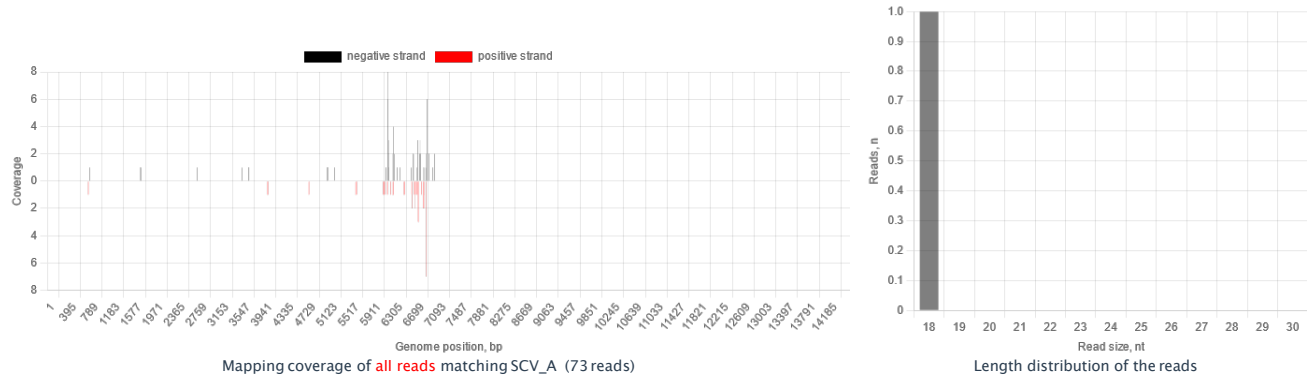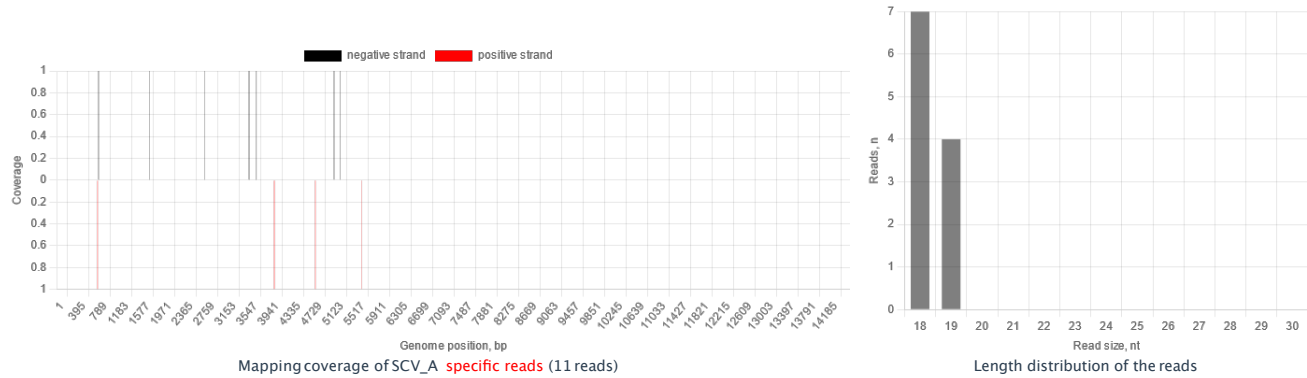

| Dataset | Input reads | Virus | Reference | Mapped reads | Mapped reads, % | Forward/Reverse balance | Nonredundant, % | Strain specific | Strain specific, % from total mapped reads |
|---------|-------------|-------|-----------|--------------|-----------------|-------------------------|-----------------|-----------------|--------------------------------------------|
| S108    | 10000000    | SCV   | SCV_B     | 3            | 0.000           | Infinity                | 100.0           | 39              | 1300.0                                     |

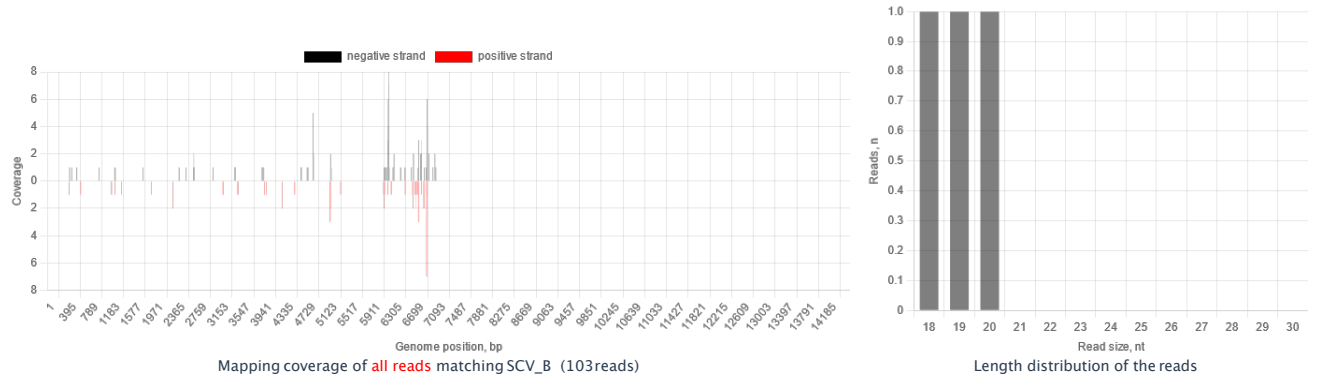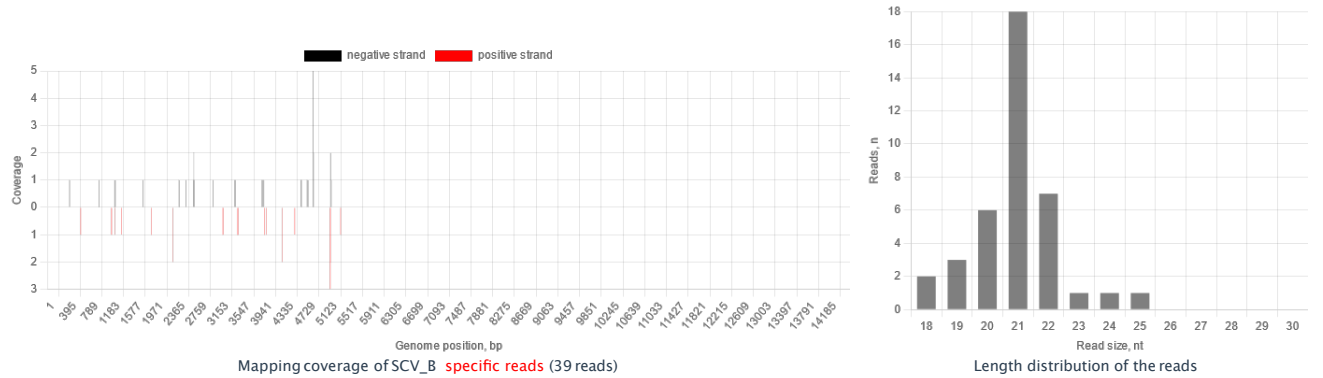

| Dataset | Input reads | Virus | Reference  | Mapped reads | Mapped reads, % | Forward/Reverse balance | Nonredundant, % | Strain specific | Strain specific, % from total mapped reads |
|---------|-------------|-------|------------|--------------|-----------------|-------------------------|-----------------|-----------------|--------------------------------------------|
| S108    | 10000000    | SMoV  | SMoV_RNA1A | 199          | 0.002           | 1.3                     | 87.9            | 73              | 36.7                                       |

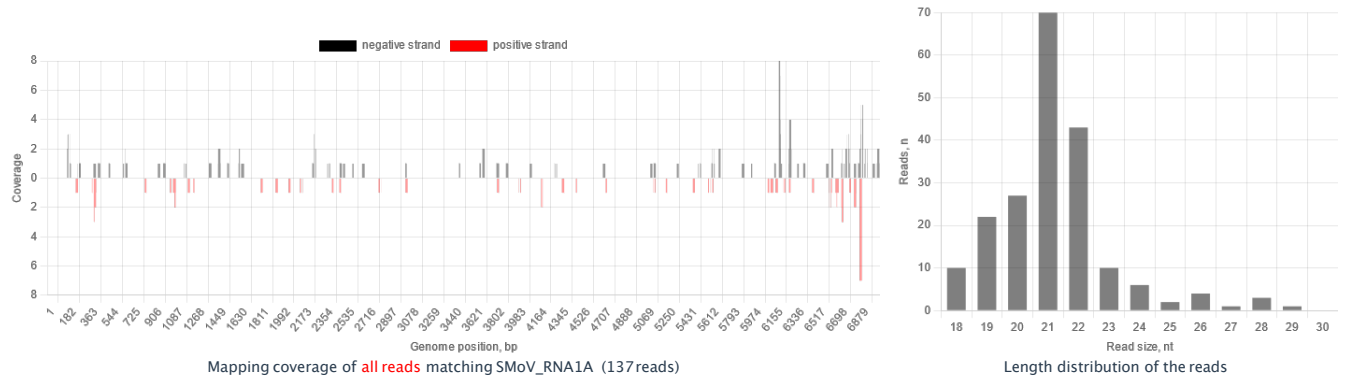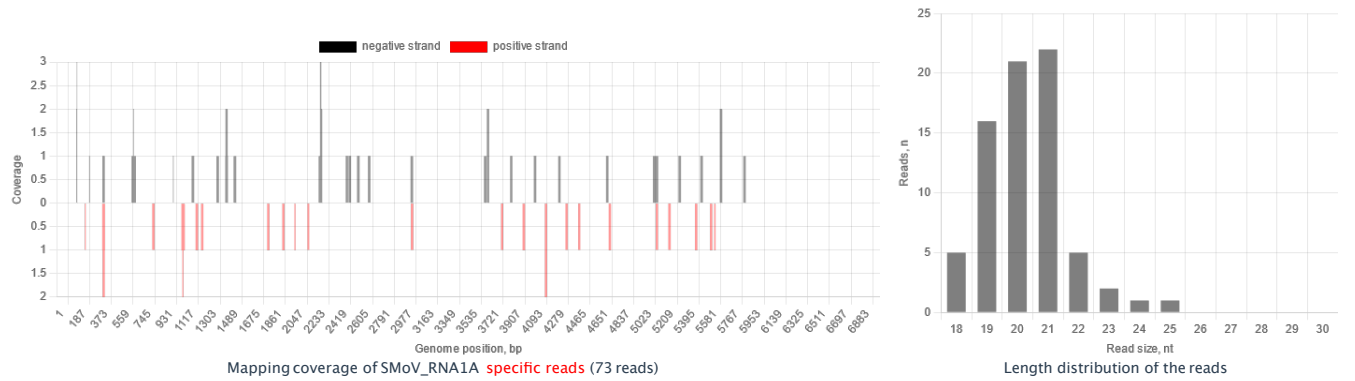

| Dataset | Input reads | Virus | Reference  | Mapped reads | Mapped reads, % | Forward/Reverse balance | Nonredundant, % | Strain specific | Strain specific, % from total mapped reads |
|---------|-------------|-------|------------|--------------|-----------------|-------------------------|-----------------|-----------------|--------------------------------------------|
| S108    | 10000000    | SMoV  | SMoV_RNA1B | 133          | 0.001           | 1.8                     | 87.2            | 87              | 65.4                                       |

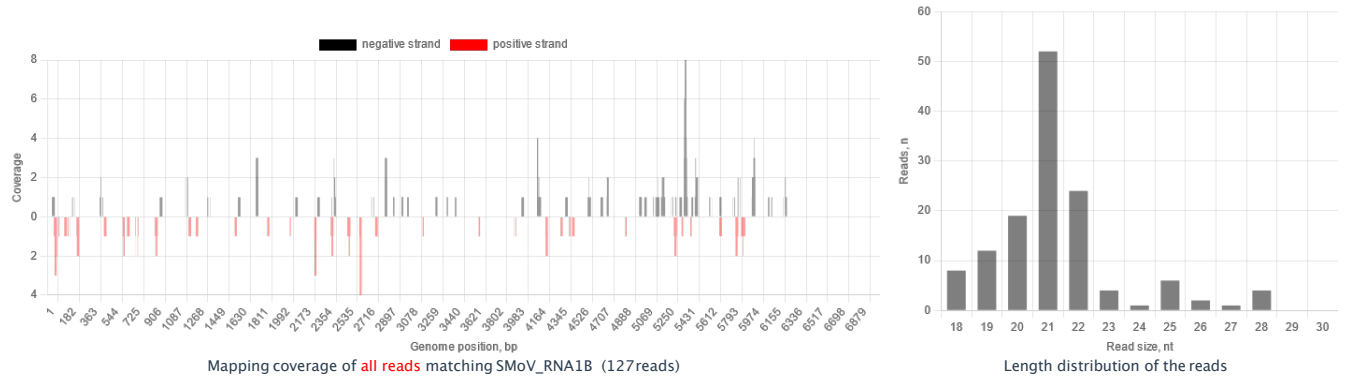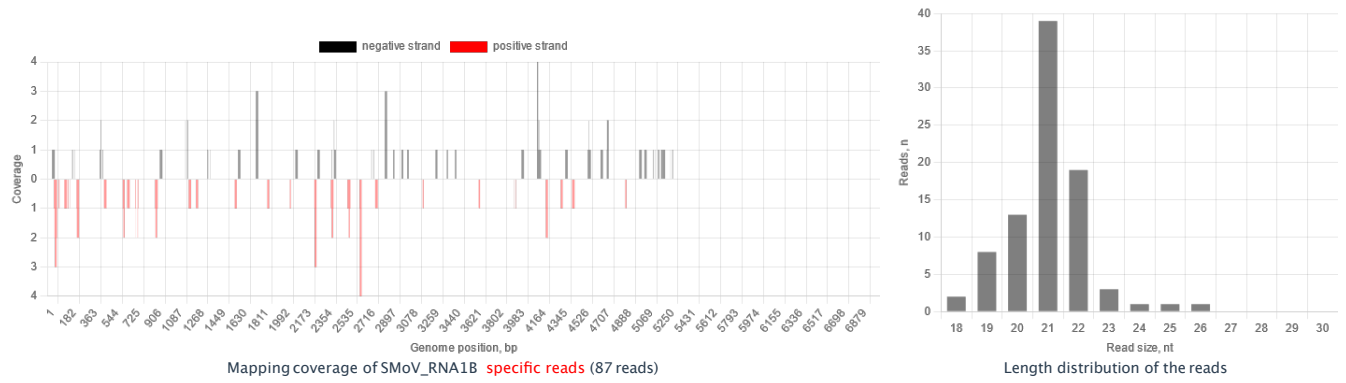

| Dataset | Input reads | Virus | Reference  | Mapped reads | Mapped reads, % | Forward/Reverse balance | Nonredundant, % | Strain specific | Strain specific, % from total mapped reads |
|---------|-------------|-------|------------|--------------|-----------------|-------------------------|-----------------|-----------------|--------------------------------------------|
| S108    | 10000000    | SMoV  | SMoV_RNA1C | 178          | 0.002           | 1.6                     | 89.3            | 0               | 0.0                                        |

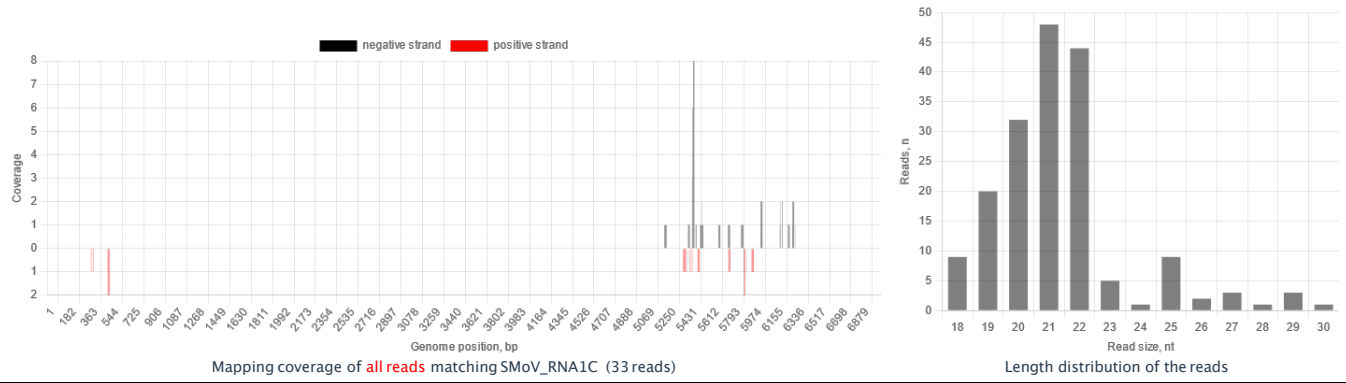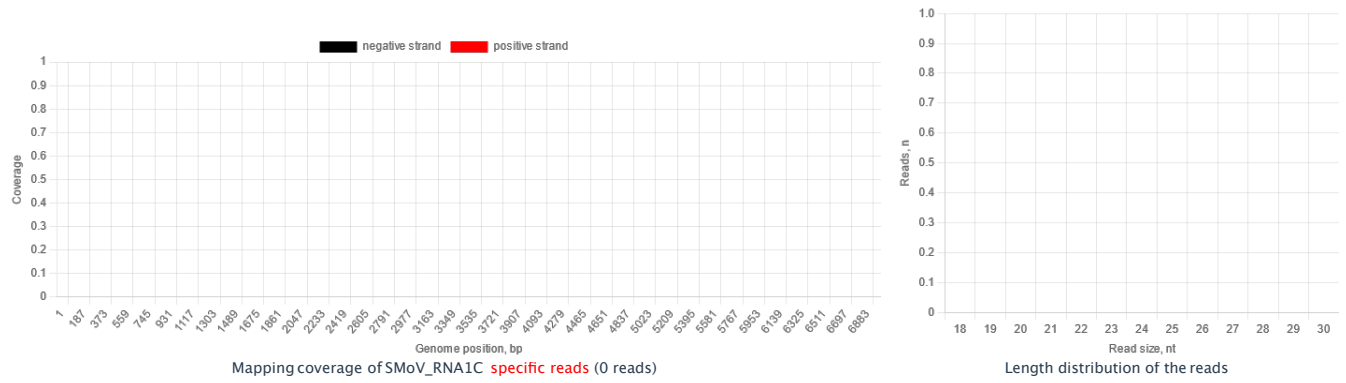

| Dataset | Input reads | Virus | Reference  | Mapped reads | Mapped reads, % | Forward/Reverse balance | Nonredundant, % | Strain specific | Strain specific, % from total mapped reads |
|---------|-------------|-------|------------|--------------|-----------------|-------------------------|-----------------|-----------------|--------------------------------------------|
| S108    | 10000000    | SMoV  | SMoV_RNA2A | 154          | 0.002           | 2.3                     | 90.3            | 76              | 49.4                                       |

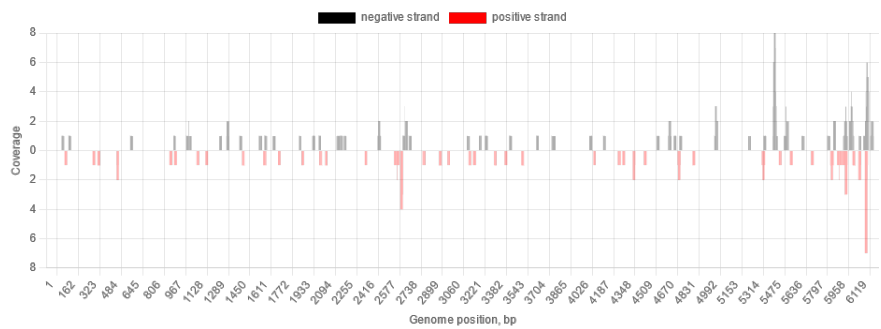

Mapping coverage of **all reads** matching SMoV\_RNA2A (140reads)

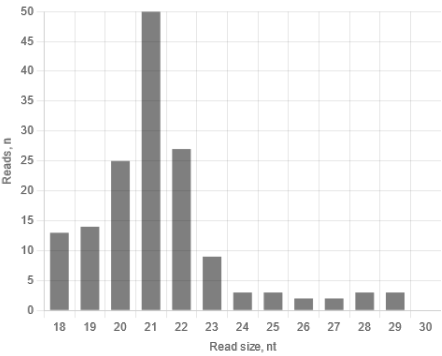

Length distribution of the reads

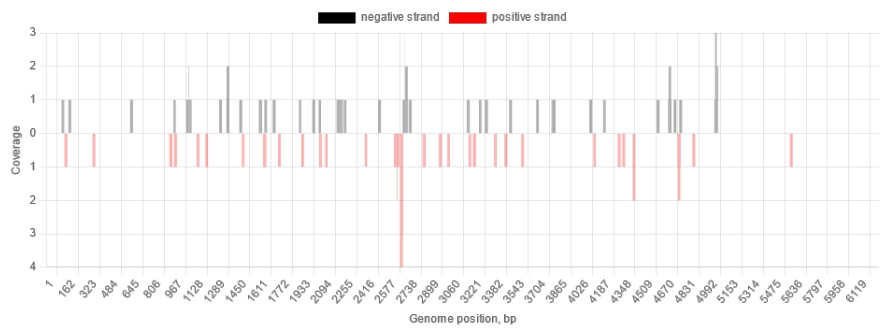

Mapping coverage of SMoV\_RNA2A **specific reads** (76 reads)

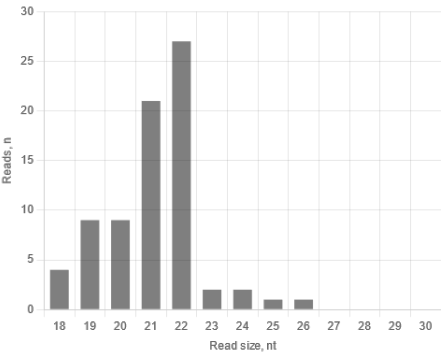

Length distribution of the reads

| Dataset | Input reads | Virus | Reference  | Mapped reads | Mapped reads, % | Forward/Reverse balance | Nonredundant, % | Strain specific | Strain specific, % from total mapped reads |
|---------|-------------|-------|------------|--------------|-----------------|-------------------------|-----------------|-----------------|--------------------------------------------|
| S108    | 10000000    | SMoV  | SMoV_RNA2B | 85           | 0.001           | 1.5                     | 94.1            | 11985           | 14100.0                                    |

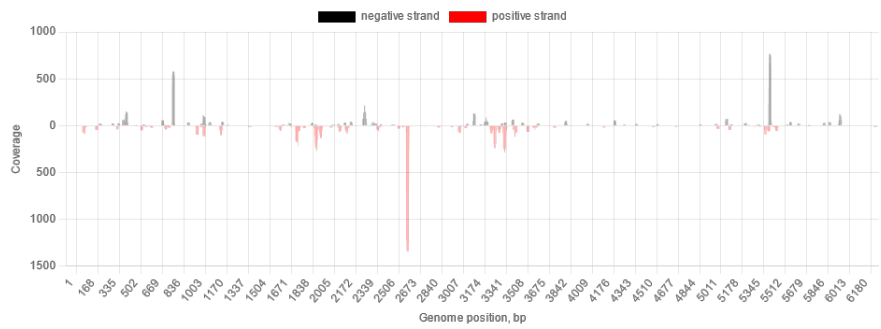

Mapping coverage of **all reads** matching SMoV\_RNA2B (13594reads)

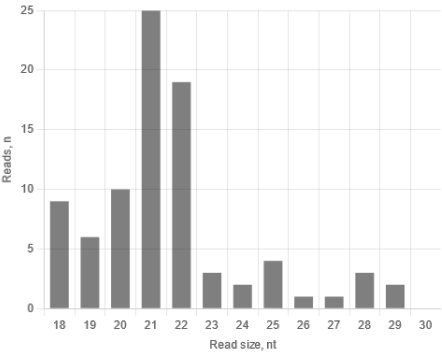

Length distribution of the reads

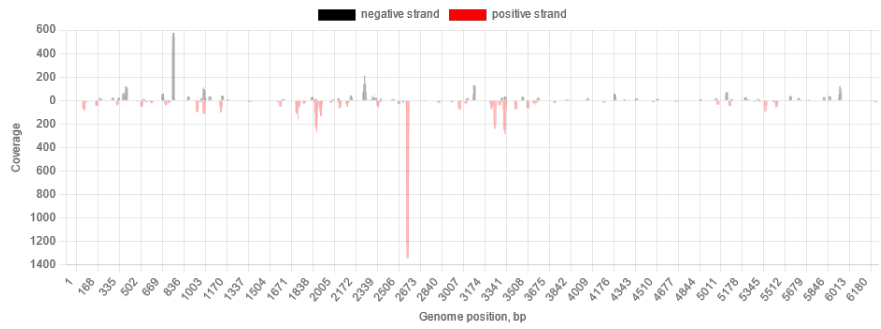

Mapping coverage of SMoV\_RNA2B **specific reads** (11985reads)

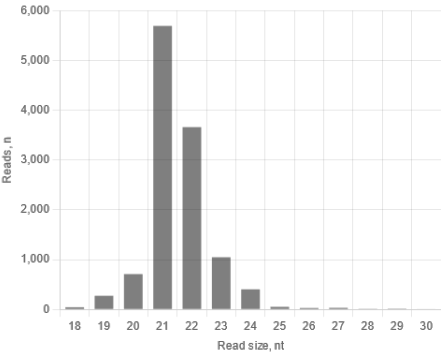

Length distribution of the reads

| Dataset | Input reads | Virus | Reference  | Mapped reads | Mapped reads, % | Forward/Reverse balance | Nonredundant, % | Strain specific | Strain specific, % from total mapped reads |
|---------|-------------|-------|------------|--------------|-----------------|-------------------------|-----------------|-----------------|--------------------------------------------|
| S108    | 10000000    | SMoV  | SMoV_RNA2C | 239          | 0.002           | 1.5                     | 86.6            | 13356           | 5588.3                                     |

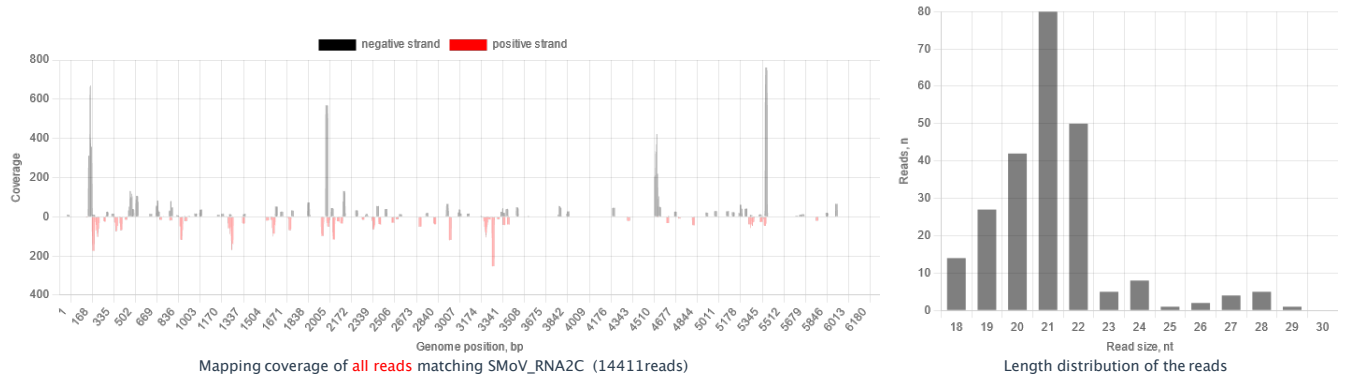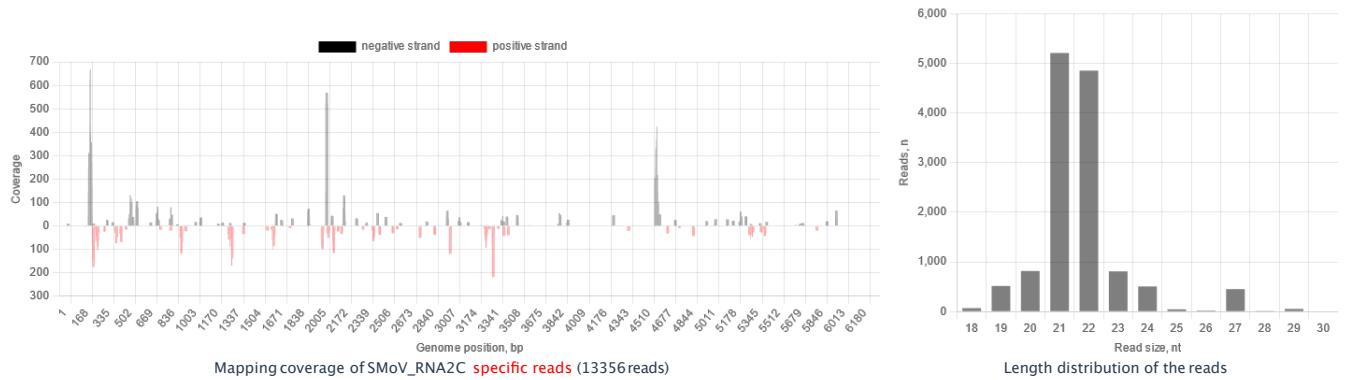

| Dataset | Input reads | Virus | Reference | Mapped reads | Mapped reads, % | Forward/Reverse balance | Nonredundant, % | Strain specific | Strain specific, % from total mapped reads |
|---------|-------------|-------|-----------|--------------|-----------------|-------------------------|-----------------|-----------------|--------------------------------------------|
| S108    | 10000000    | StrV1 | StrV1_A   | 201          | 0.002           | 1.0                     | 50.2            | 60              | 29.9                                       |

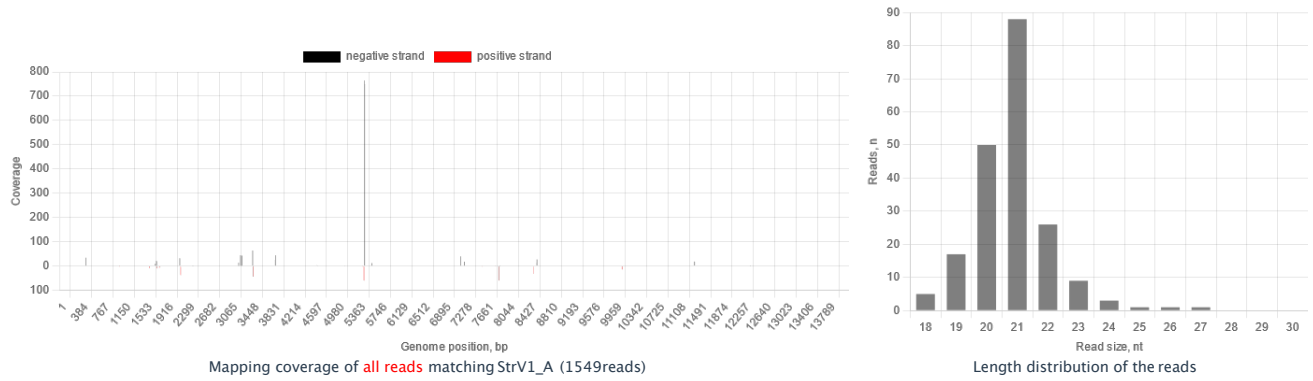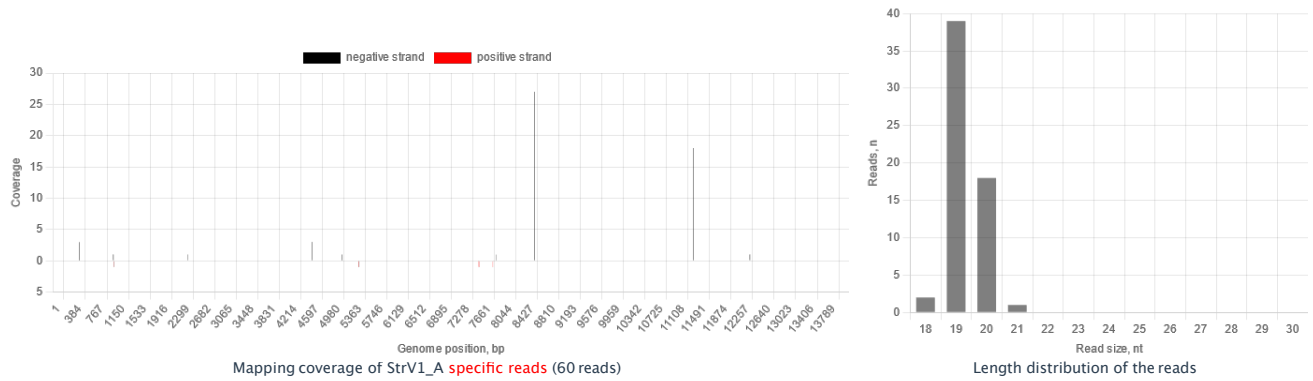



| Dataset | Input reads | Virus | Reference | Mapped reads | Mapped reads, % | Forward/Reverse balance | Nonredundant, % | Strain specific | Strain specific, % from total mapped reads |
|---------|-------------|-------|-----------|--------------|-----------------|-------------------------|-----------------|-----------------|--------------------------------------------|
| S108    | 10000000    | StrV1 | StrV1_B   | 9775         | 0.098           | 2.3                     | 38.1            | 1               | 0.0                                        |

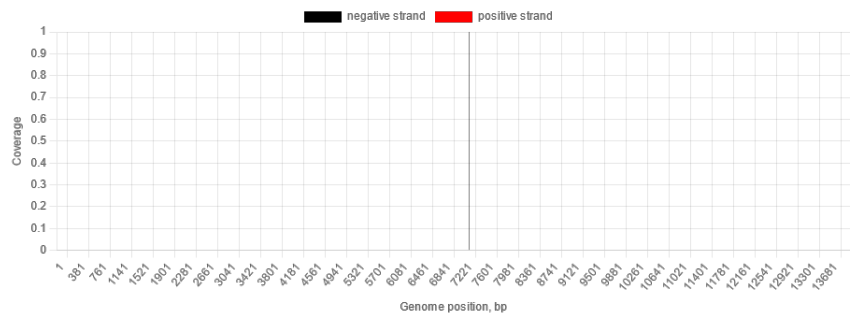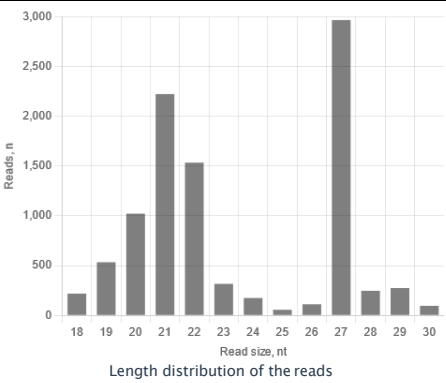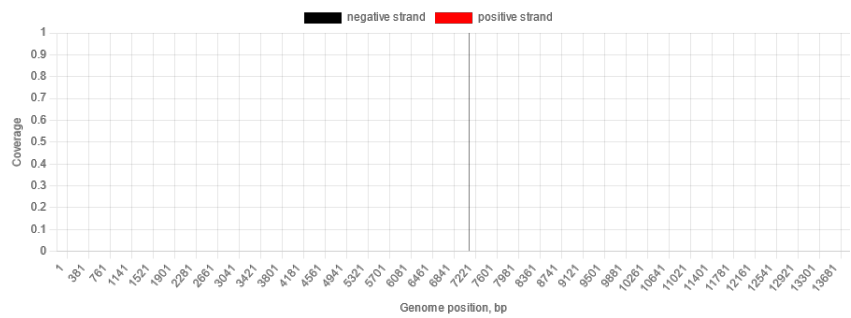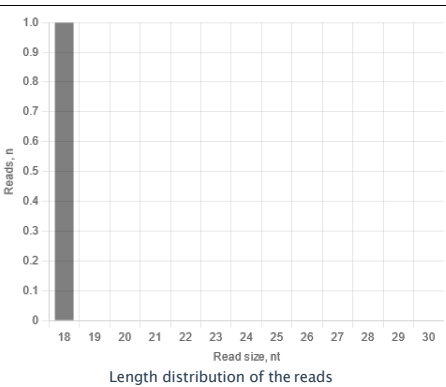

| Dataset | Input reads | Virus | Reference | Mapped reads | Mapped reads, % | Forward/Reverse balance | Nonredundant, % | Strain specific | Strain specific, % from total mapped reads |
|---------|-------------|-------|-----------|--------------|-----------------|-------------------------|-----------------|-----------------|--------------------------------------------|
| S108    | 10000000    | StrV1 | StrV1_C   | 112          | 0.001           | 0.8                     | 57.1            | 2               | 1.8                                        |

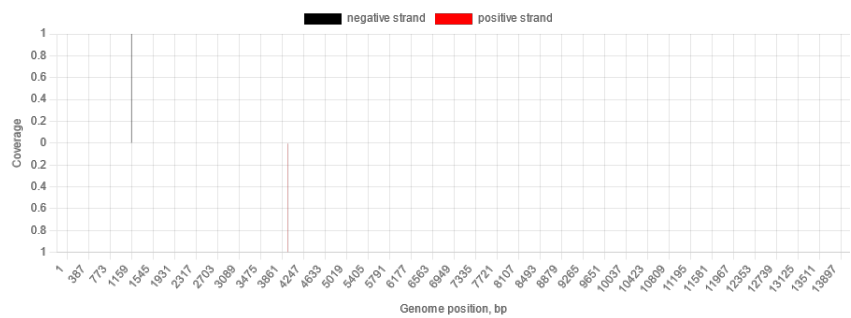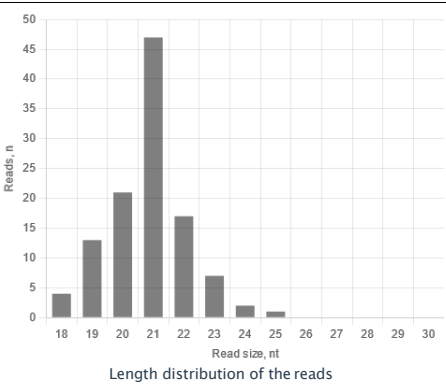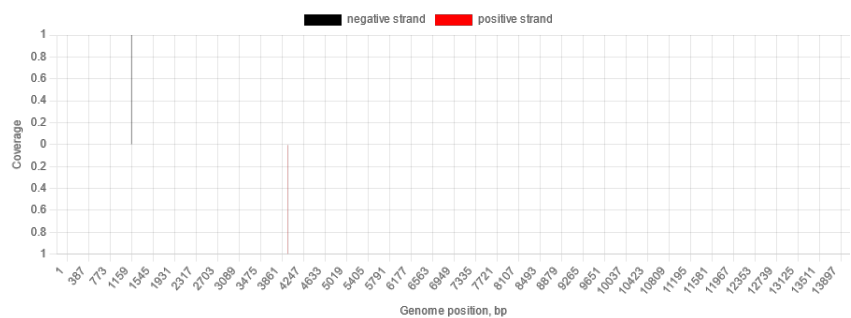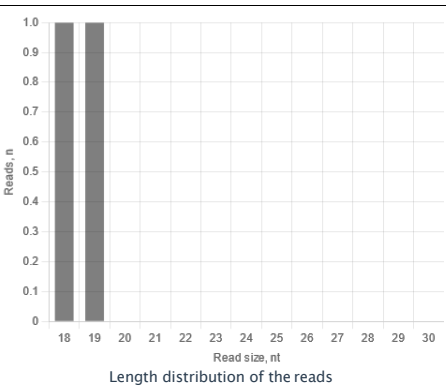

Mappings of the S95 reads against the viral references.

| Dataset | Input reads | Virus | Reference | Mapped reads | Mapped reads, % | Forward/Reverse balance | Nonredundant, % | Strain specific | Strain specific, % from total mapped reads |
|---------|-------------|-------|-----------|--------------|-----------------|-------------------------|-----------------|-----------------|--------------------------------------------|
| S95     | 10000000    | StrV1 | StrV1_A   | 19940        | 0.199           | 1.0                     | 46.2            | 1 1 0 . 1       |                                            |

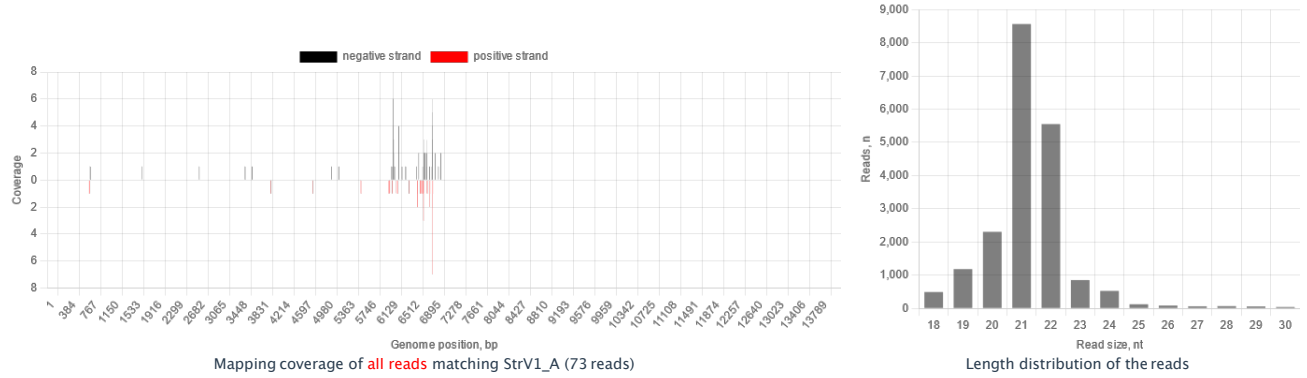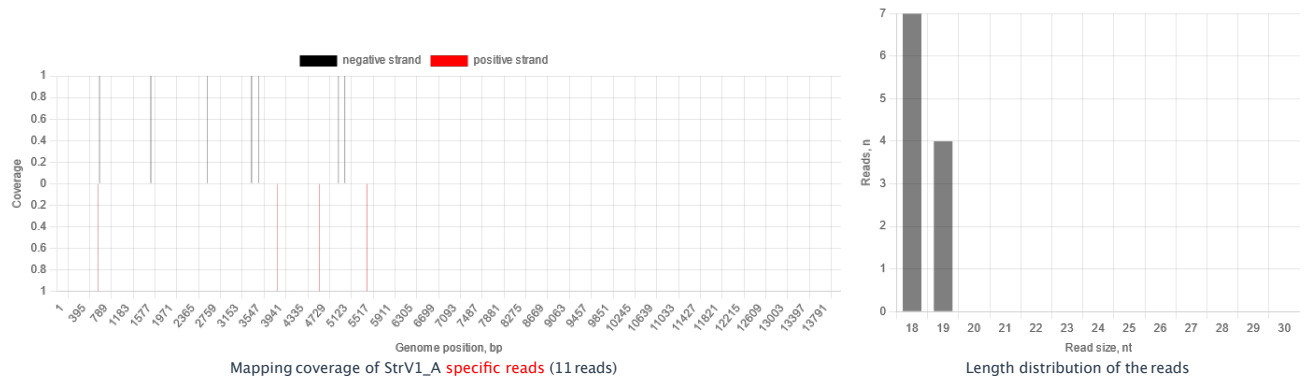

| Dataset | Input reads | Virus | Reference | Mapped reads | Mapped reads, % | Forward/Reverse balance | Nonredundant, % | Strain specific | Strain specific, % from total mapped reads |
|---------|-------------|-------|-----------|--------------|-----------------|-------------------------|-----------------|-----------------|--------------------------------------------|
| S95     | 10000000    | StrV1 | StrV1_B   | 358          | 0.004           | 1.2                     | 48.3            | 39              | 10.9                                       |

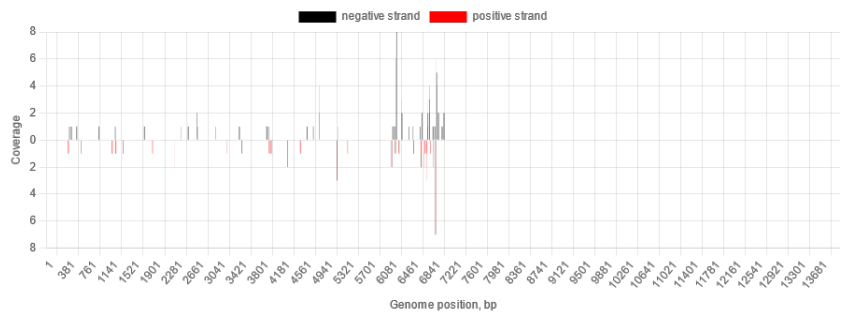

Mapping coverage of all reads matching StrV1\_B (103 reads)

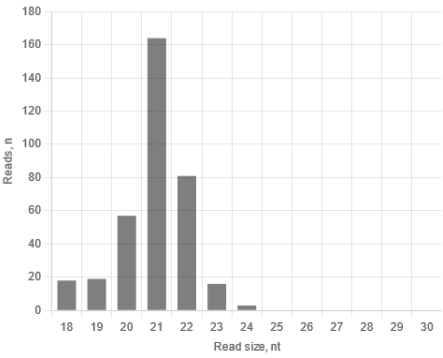

Length distribution of the reads

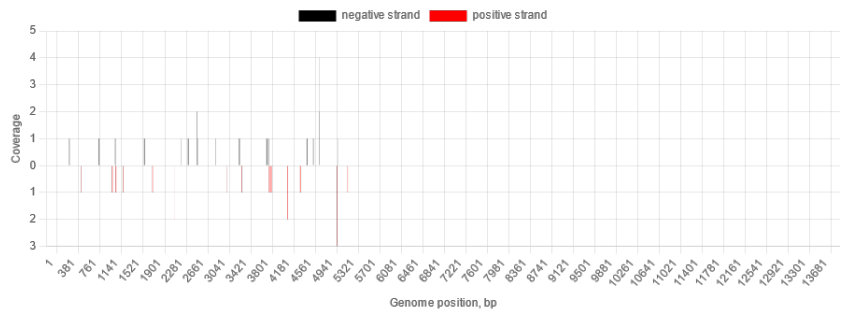

Mapping coverage of StrV1\_B specific reads (39 reads)

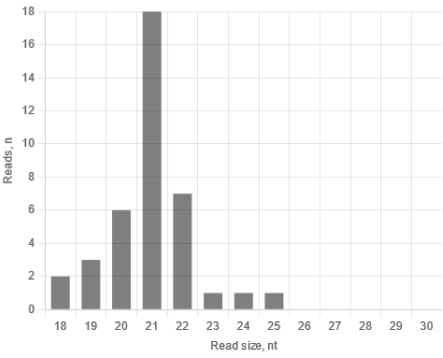

Length distribution of the reads

| Dataset | Input reads | Virus | Reference | Mapped reads | Mapped reads, % | Forward/Reverse balance | Nonredundant, % | Strain specific | Strain specific, % from total mapped reads |
|---------|-------------|-------|-----------|--------------|-----------------|-------------------------|-----------------|-----------------|--------------------------------------------|
| S95     | 10000000    | StrV1 | StrV1_C   | 2174         | 0.022           | 1.3                     | 41.7            | 73              | 3.4                                        |

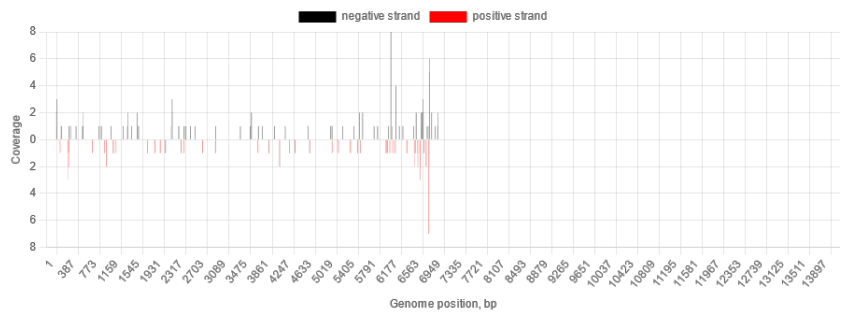

Mapping coverage of all reads matching StrV1\_C (137 reads)

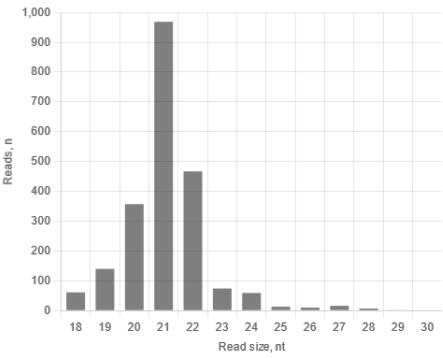

Length distribution of the reads

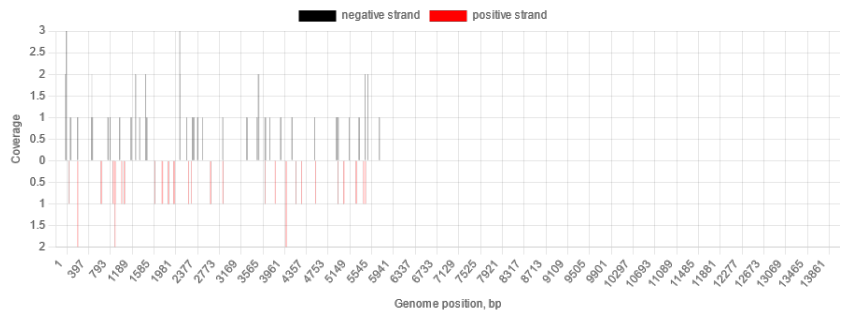

Mapping coverage of StrV1\_C specific reads (73 reads)

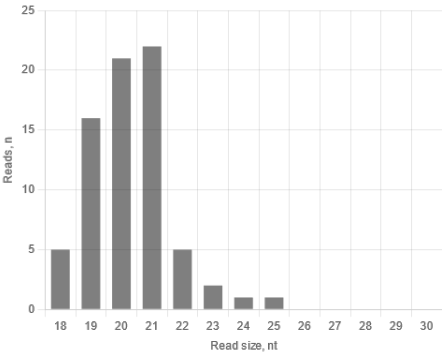

Length distribution of the reads

Mappings of the S98 reads against the viral references.

| Dataset | Input reads | Virus | Reference     | Mapped reads | Mapped reads, % | Forward/Reverse balance | Nonredundant, % | Strain specific | Strain specific, % from total mapped reads |
|---------|-------------|-------|---------------|--------------|-----------------|-------------------------|-----------------|-----------------|--------------------------------------------|
| S98     | 9901238     | SMoV  | SMoV_RNA1A270 |              | 0.003           | 1.7                     | 80.0            | 11              | 4.1                                        |

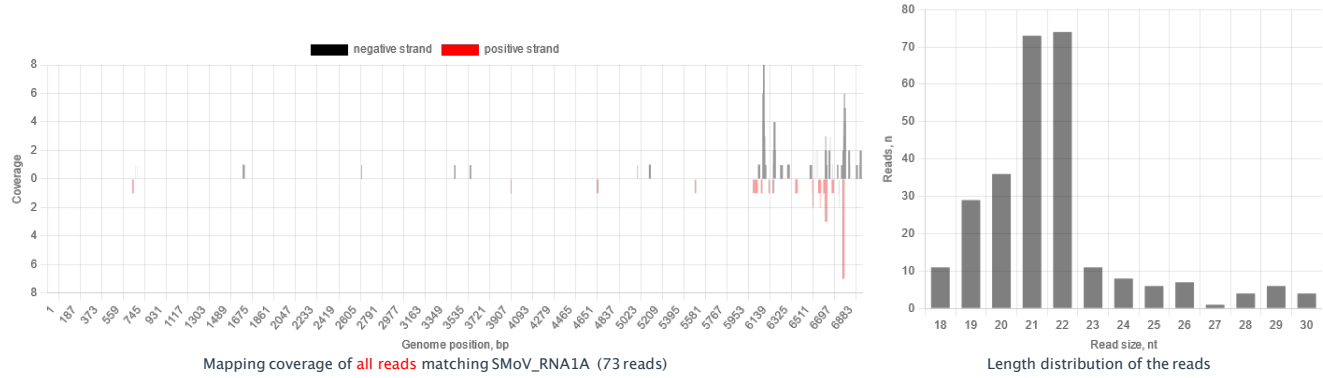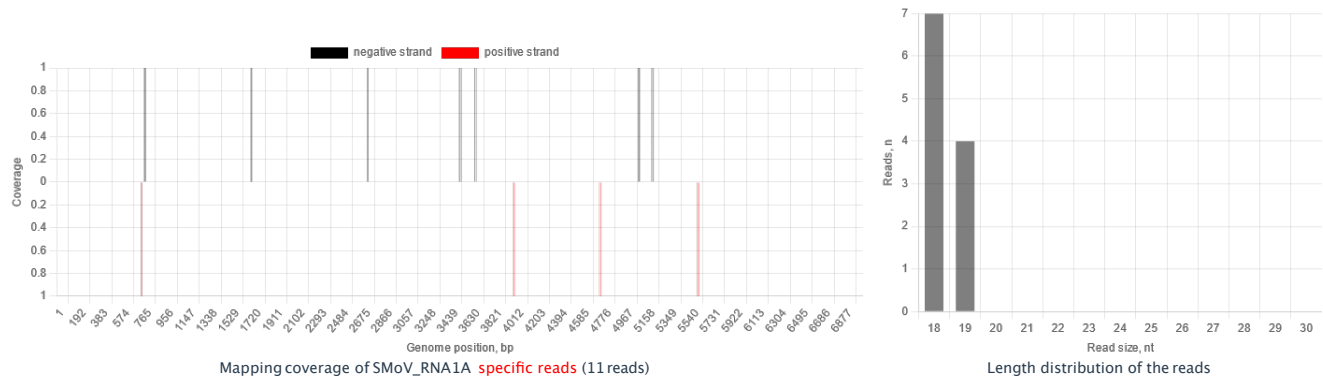

| Dataset | Input reads | Virus | Reference  | Mapped reads | Mapped reads, % | Forward/Reverse balance | Nonredundant, % | Strain specific | Strain specific, % from total mapped reads |
|---------|-------------|-------|------------|--------------|-----------------|-------------------------|-----------------|-----------------|--------------------------------------------|
| S98     | 9901238     | SMoV  | SMoV_RNA1B | 418          | 0.004           | 1.5                     | 84.9            | 39              | 9.3                                        |

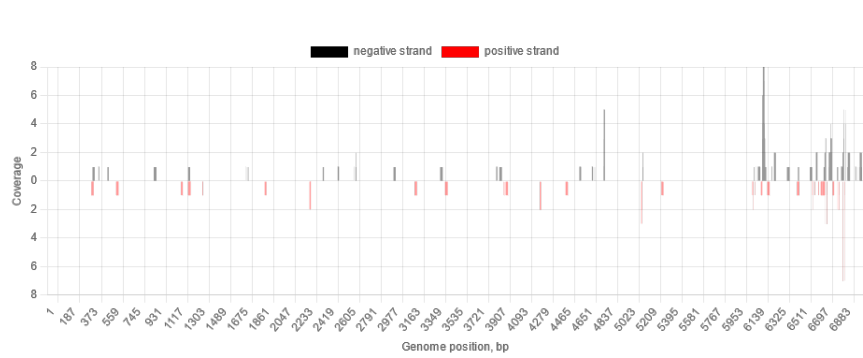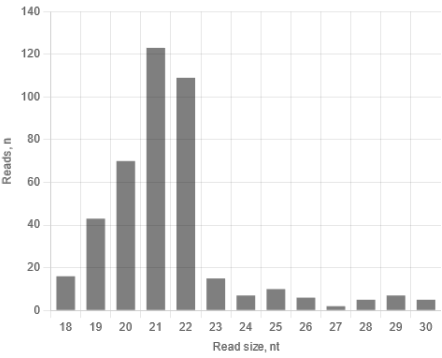

Mapping coverage of **all reads** matching SMoV\_RNA1B (103reads)

Length distribution of the reads

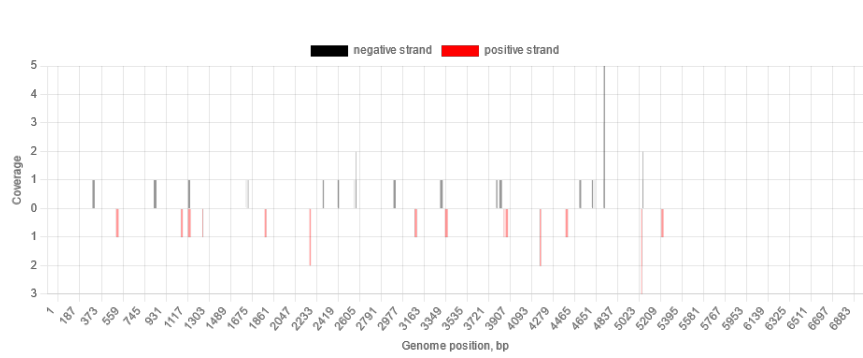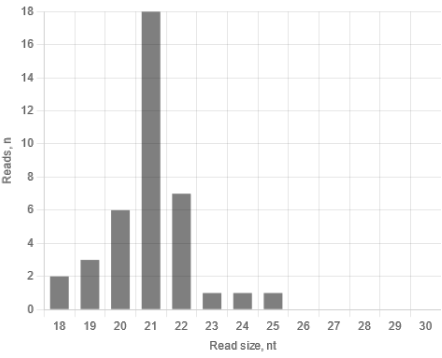

Mapping coverage of SMoV\_RNA1B **specific reads** (39reads)

Length distribution of the reads

| Dataset | Input reads | Virus | Reference  | Mapped reads | Mapped reads, % | Forward/Reverse balance | Nonredundant, % | Strain specific | Strain specific, % from total mapped reads |
|---------|-------------|-------|------------|--------------|-----------------|-------------------------|-----------------|-----------------|--------------------------------------------|
| S98     | 9901238     | SMoV  | SMoV_RNA1C | 481          | 0.005           | 1.6                     | 85.9            | 73              | 15.2                                       |

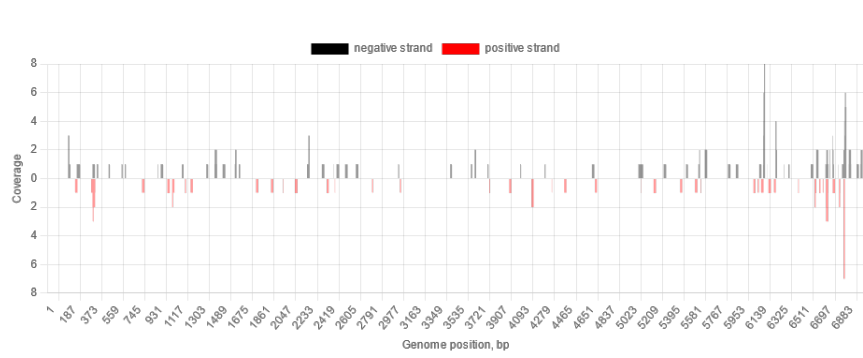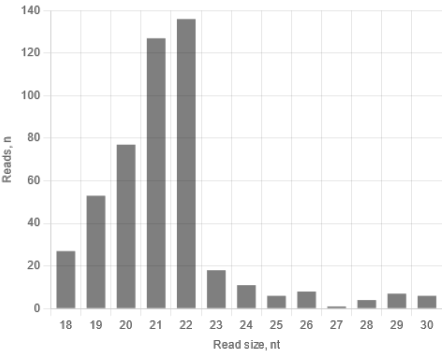

Mapping coverage of **all reads** matching SMoV\_RNA1C (137reads)

Length distribution of the reads

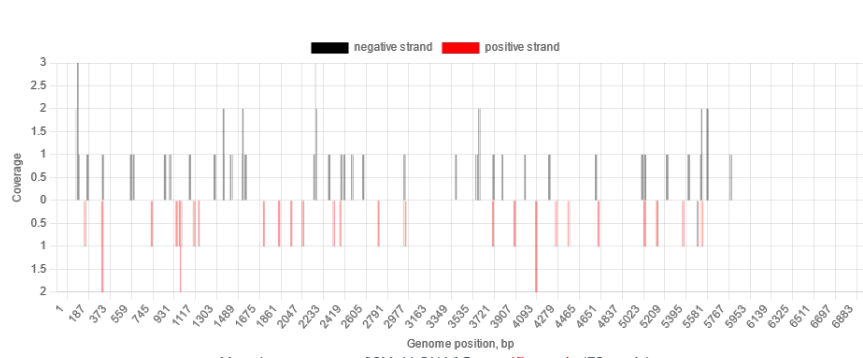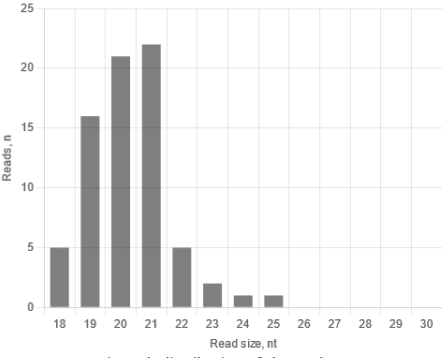

Mapping coverage of SMoV\_RNA1C **specific reads** (73 reads)

Length distribution of the reads

| Dataset | Input reads | Virus | Reference  | Mapped reads | Mapped reads, % | Forward/Reverse balance | Nonredundant, % | Strain specific | Strain specific, % from total mapped reads |
|---------|-------------|-------|------------|--------------|-----------------|-------------------------|-----------------|-----------------|--------------------------------------------|
| S98     | 9901238     | SMoV  | SMoV_RNA2A | 418          | 0.004           | 1.7                     | 88.0            | 87              | 20.8                                       |

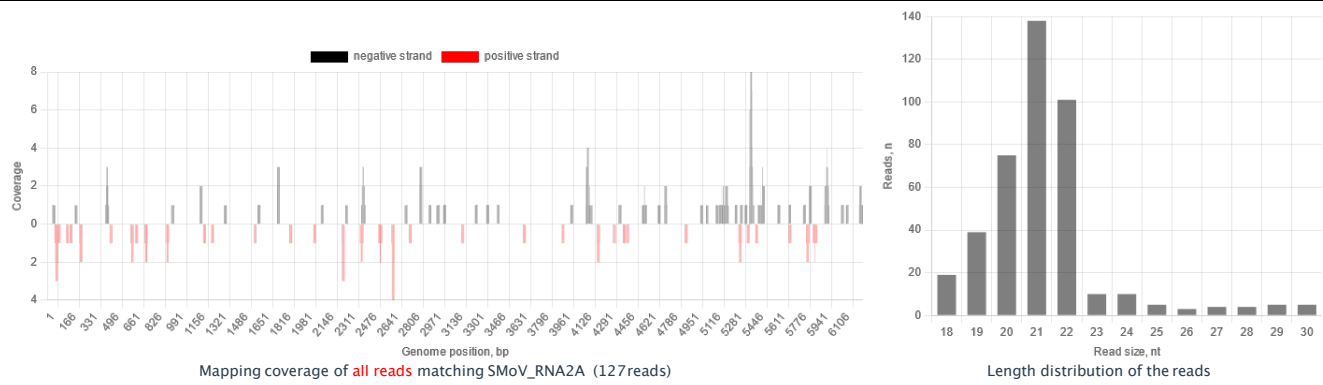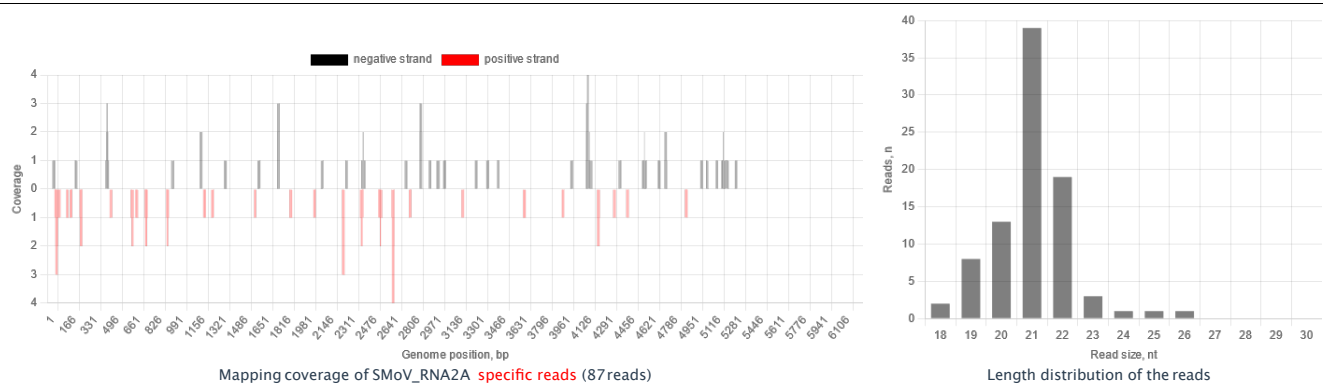

| Dataset | Input reads | Virus | Reference  | Mapped reads | Mapped reads, % | Forward/Reverse balance | Nonredundant, % | Strain specific | Strain specific, % from total mapped reads |
|---------|-------------|-------|------------|--------------|-----------------|-------------------------|-----------------|-----------------|--------------------------------------------|
| S98     | 9901238     | SMoV  | SMoV_RNA2B | 132          | 0.001           | 1.9                     | 91.7            | 0               | 0.0                                        |

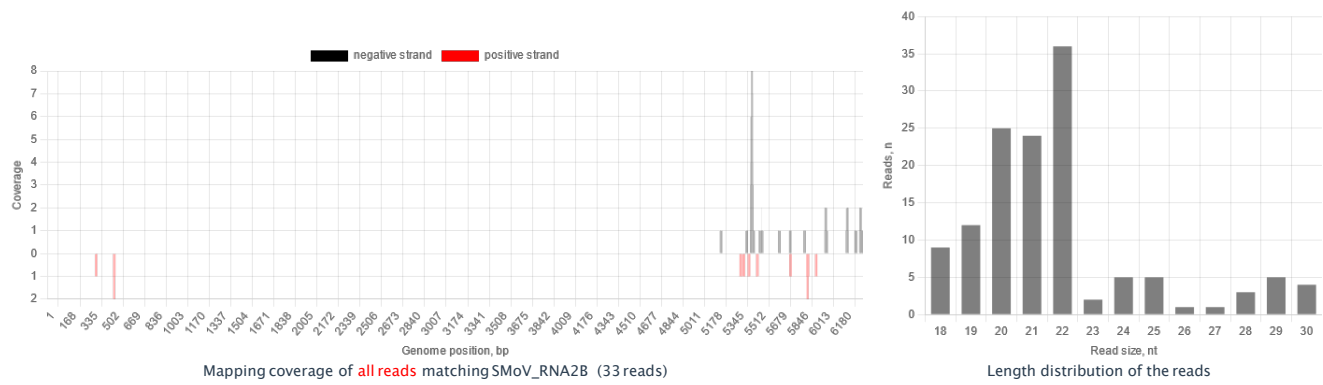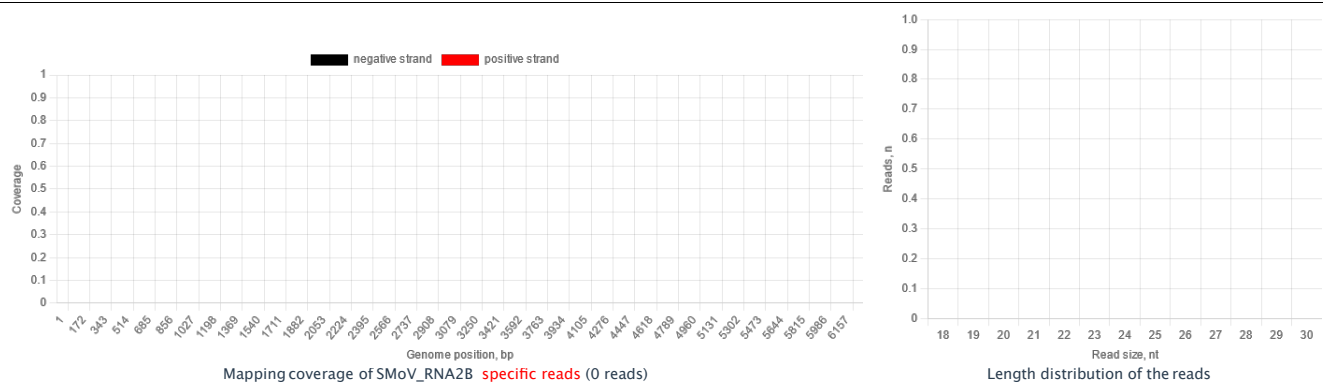

| Dataset | Input reads | Virus | Reference  | Mapped reads | Mapped reads, % | Forward/Reverse balance | Nonredundant, % | Strain specific | Strain specific, % from total mapped reads |
|---------|-------------|-------|------------|--------------|-----------------|-------------------------|-----------------|-----------------|--------------------------------------------|
| S98     | 9901238     | SMoV  | SMoV_RNA2C | 537          | 0.005           | 1.7                     | 84.4            | 76              | 14.2                                       |

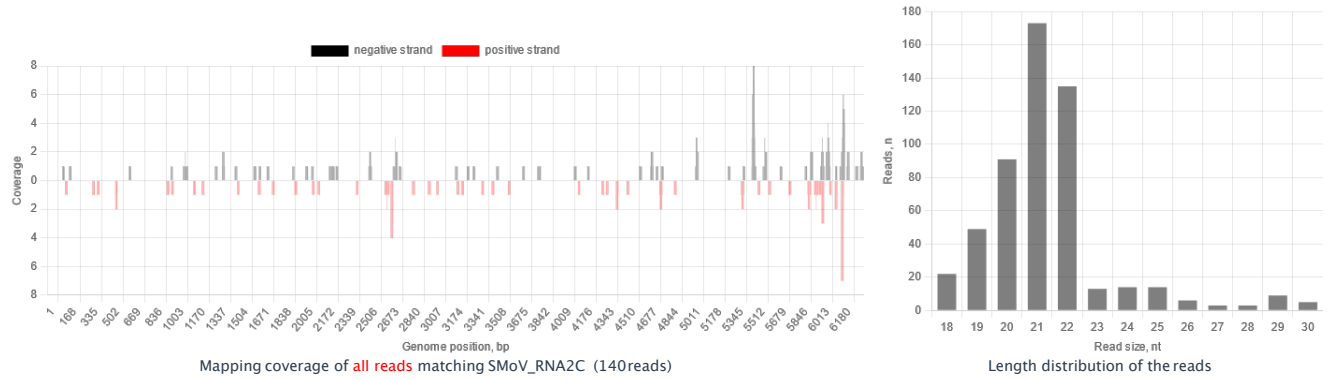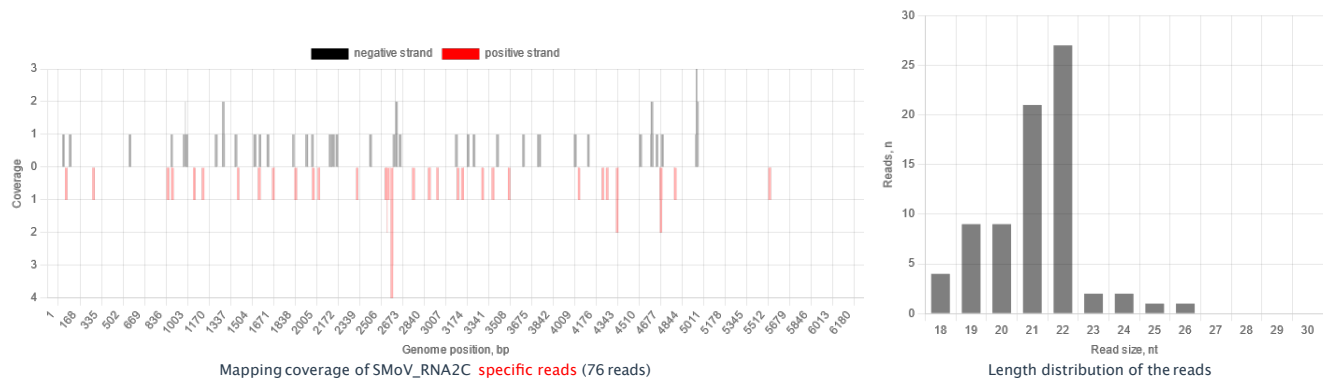

| Dataset | Input reads | Virus | Reference | Mapped reads | Mapped reads, % | Forward/Reverse balance | Nonredundant, % | Strain specific | Strain specific, % from total mapped reads |
|---------|-------------|-------|-----------|--------------|-----------------|-------------------------|-----------------|-----------------|--------------------------------------------|
| S98     | 9901238     | StrV1 | StrV1_A   | 15033        | 0.152           | 0.9                     | 43.8            | 11985           | 79.7                                       |

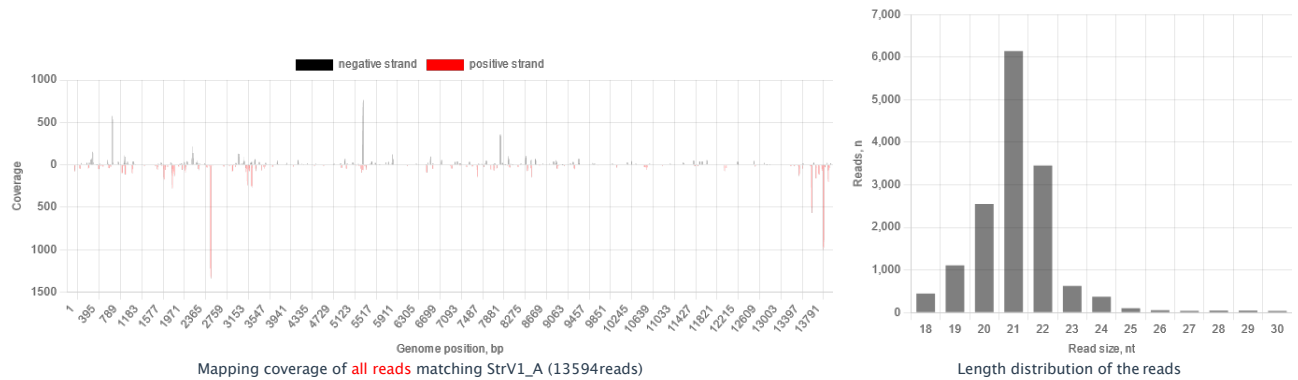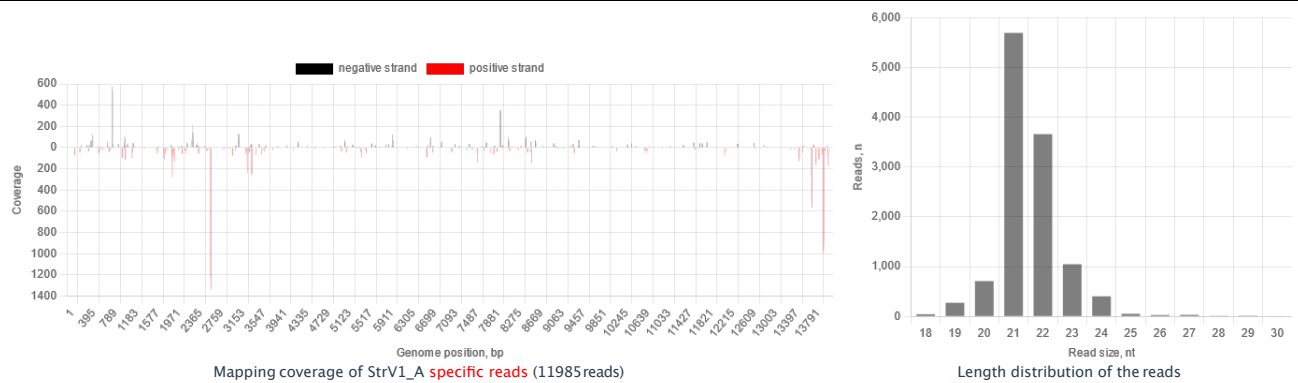

| Dataset | Input reads | Virus | Reference | Mapped reads | Mapped reads, % | Forward/Reverse balance | Nonredundant, % | Strain specific | Strain specific, % from total mapped reads |
|---------|-------------|-------|-----------|--------------|-----------------|-------------------------|-----------------|-----------------|--------------------------------------------|
| S98     | 9901238     | StrV1 | StrV1_B   | 470          | 0.005           | 0.9                     | 48.7            | 13356           | 2841.7                                     |

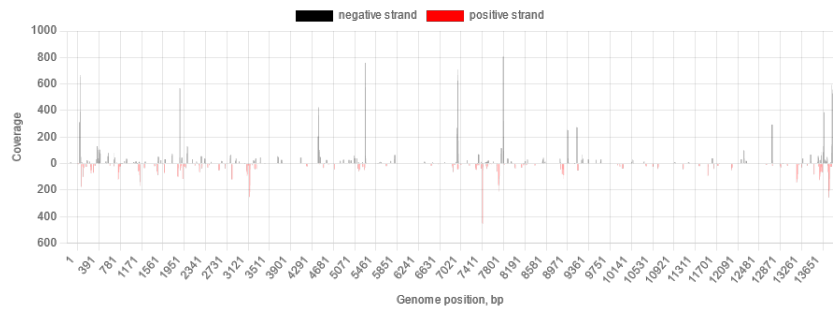

Mapping coverage of **all reads** matching StrV1\_B (14411reads)

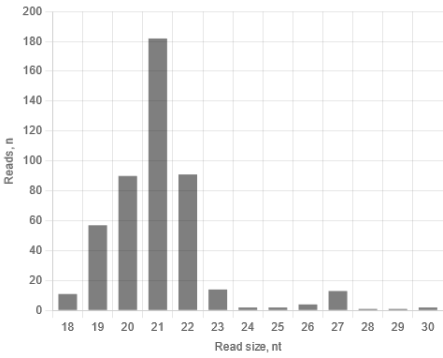

Length distribution of the reads

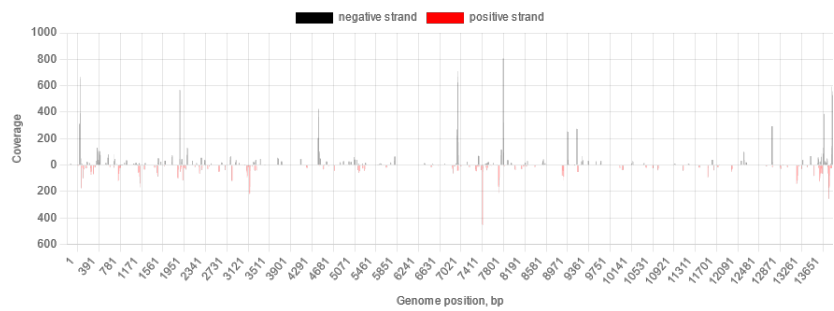

Mapping coverage of StrV1\_B **specific reads** (13356reads)

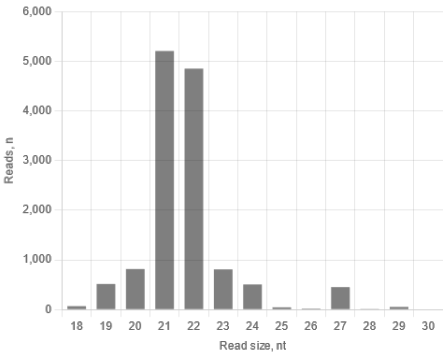

Length distribution of the reads

| Dataset | Input reads | Virus | Reference | Mapped reads | Mapped reads, % | Forward/Reverse balance | Nonredundant, % | Strain specific | Strain specific, % from total mapped reads |
|---------|-------------|-------|-----------|--------------|-----------------|-------------------------|-----------------|-----------------|--------------------------------------------|
| S98     | 9901238     | StrV1 | StrV1_C   | 1986         | 0.020           | 1.0                     | 36.0            | 60              | 3.0                                        |

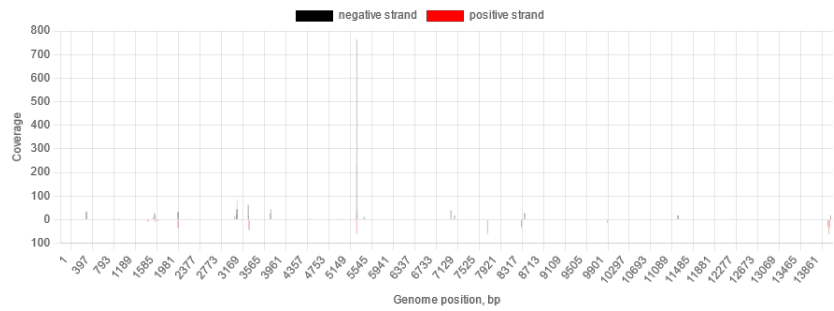

Mapping coverage of **all reads** matching StrV1\_C (1549reads)

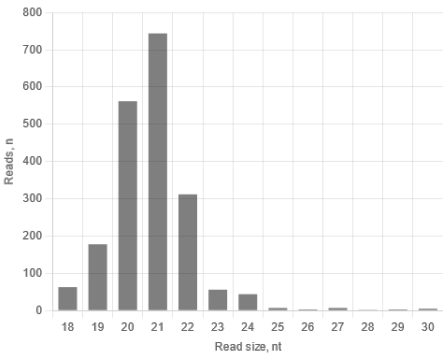

Length distribution of the reads

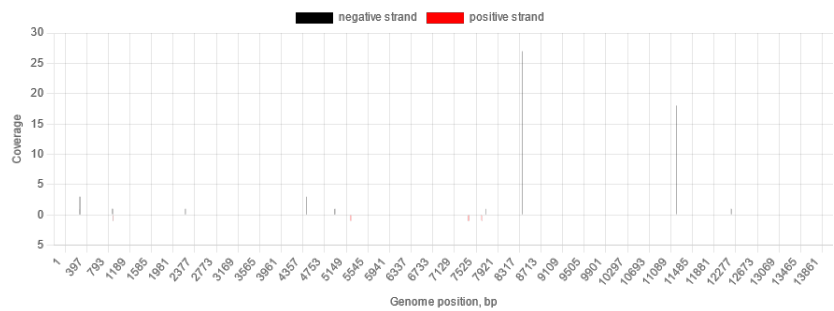

Mapping coverage of StrV1\_C **specific reads** (60 reads)

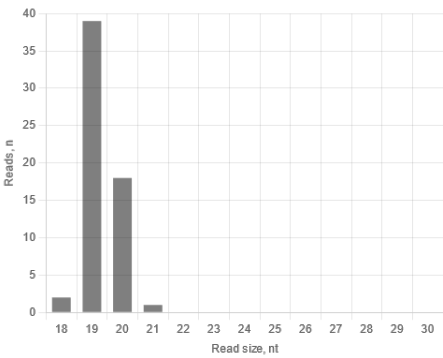

Length distribution of the reads



Mappings of the S99 reads against the viral references.

| Dataset | Input reads | Virus | Reference  | Mapped reads | Mapped reads, % | Forward/Reverse balance | Nonredundant, % | Strain specific | Strain specific, % from total mapped reads |
|---------|-------------|-------|------------|--------------|-----------------|-------------------------|-----------------|-----------------|--------------------------------------------|
| S99     | 6772412     | SMoV  | SMoV_RNA1A | 132          | 0.002           | 1.5                     | 85.6            | 11              | 8.3                                        |

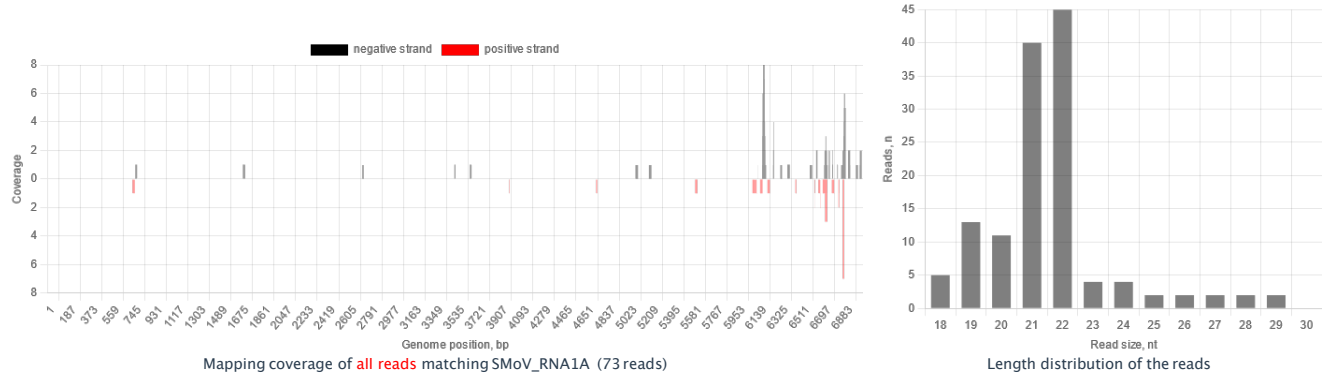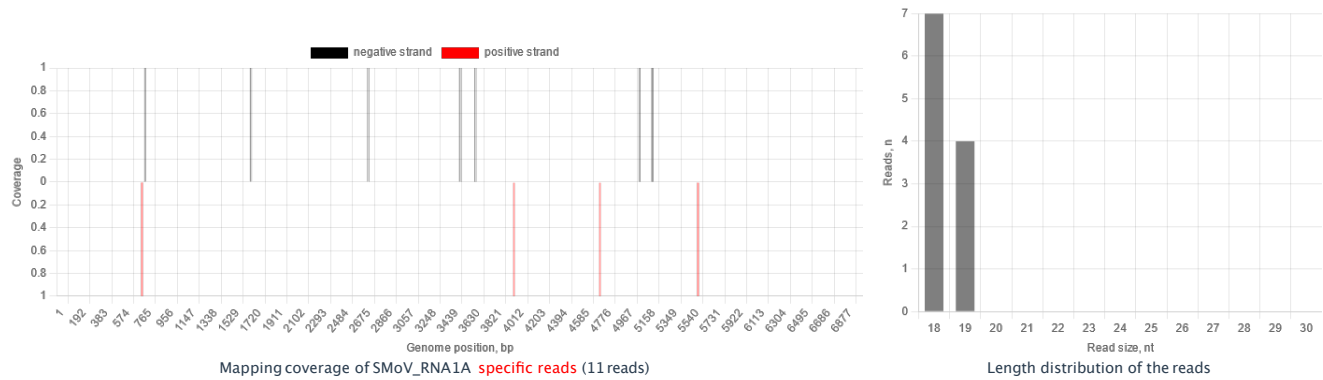

| Dataset | Input reads | Virus | Reference  | Mapped reads | Mapped reads, % | Forward/Reverse balance | Nonredundant, % | Strain specific | Strain specific, % from total mapped reads |
|---------|-------------|-------|------------|--------------|-----------------|-------------------------|-----------------|-----------------|--------------------------------------------|
| S99     | 6772412     | SMoV  | SMoV_RNA1B | 176          | 0.003           | 1.5                     | 89.8            | 39              | 22.2                                       |

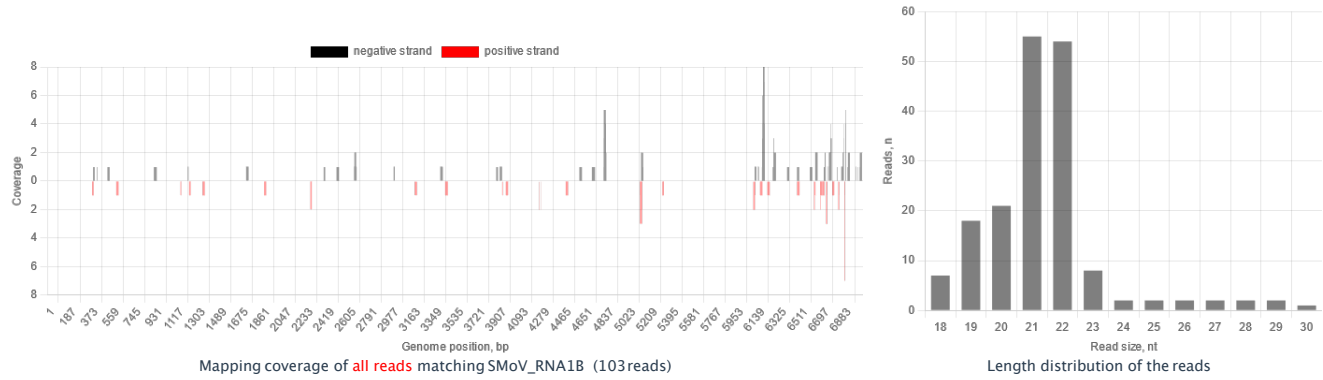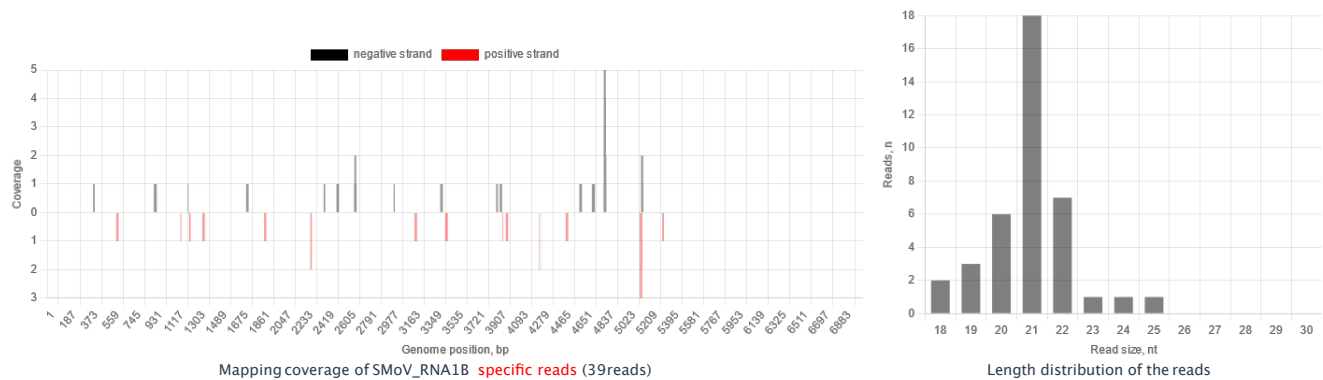

| Dataset | Input reads | Virus | Reference  | Mapped reads | Mapped reads, % | Forward/Reverse balance | Nonredundant, % | Strain specific | Strain specific, % from total mapped reads |
|---------|-------------|-------|------------|--------------|-----------------|-------------------------|-----------------|-----------------|--------------------------------------------|
| S99     | 6772412     | SMoV  | SMoV_RNA1C | 246          | 0.004           | 1.5                     | 88.2            | 73              | 29.7                                       |

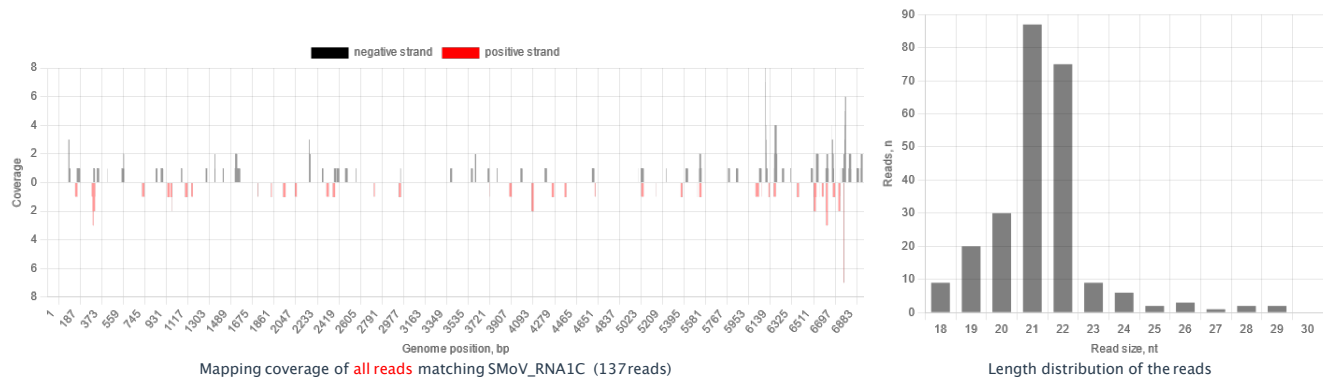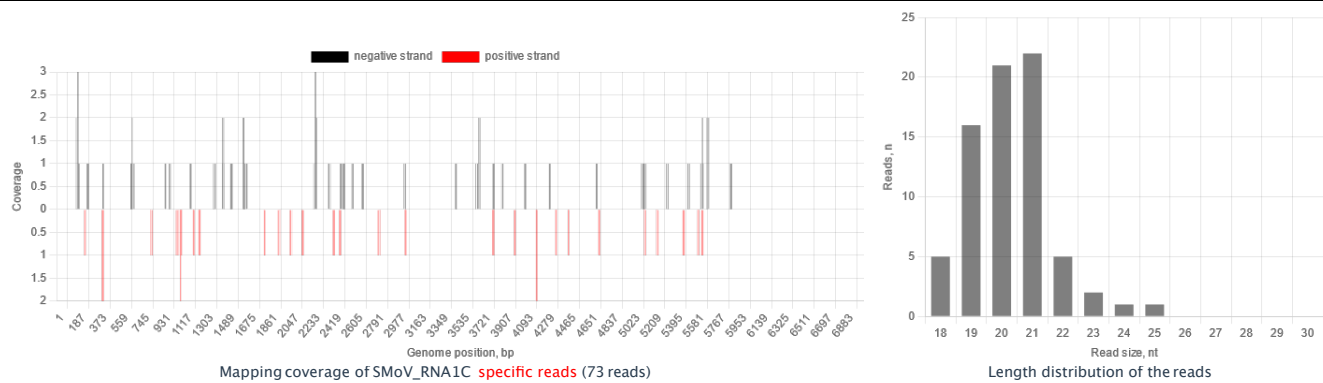

| Dataset | Input reads | Virus | Reference  | Mapped reads | Mapped reads, % | Forward/Reverse balance | Nonredundant, % | Strain specific | Strain specific, % from total mapped reads |
|---------|-------------|-------|------------|--------------|-----------------|-------------------------|-----------------|-----------------|--------------------------------------------|
| S99     | 6772412     | SMoV  | SMoV_RNA2A | 190          | 0.003           | 1.7                     | 90.0            | 87              | 45.8                                       |

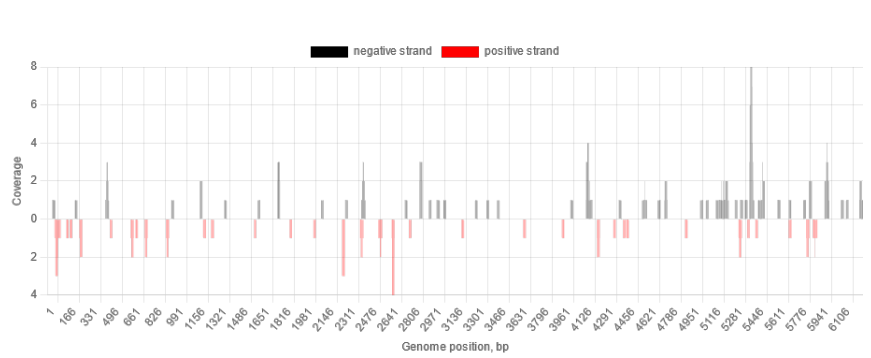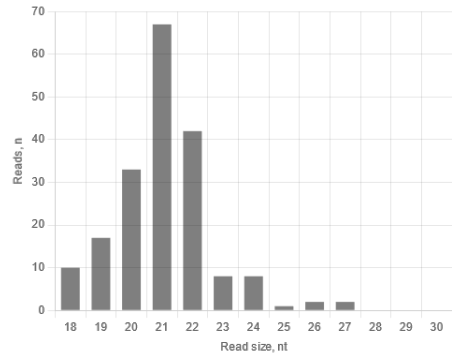

Mapping coverage of **all reads** matching SMoV\_RNA2A (127reads)

Length distribution of the reads

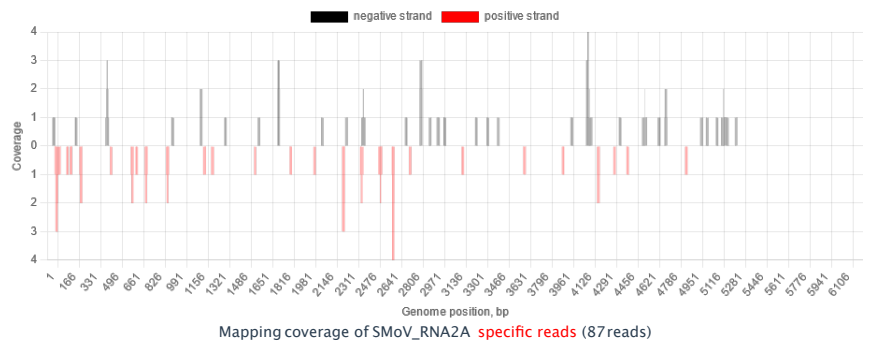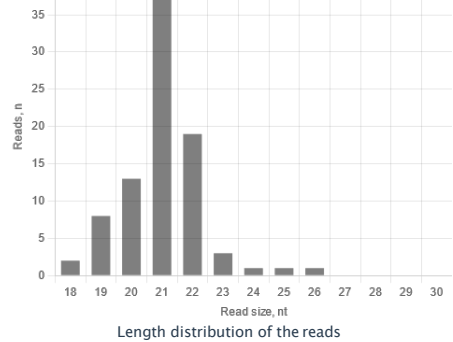

Mapping coverage of SMoV\_RNA2A **specific reads** (87reads)

Length distribution of the reads

| Dataset | Input reads | Virus | Reference  | Mapped reads | Mapped reads, % | Forward/Reverse balance | Nonredundant, % | Strain specific | Strain specific, % from total mapped reads |
|---------|-------------|-------|------------|--------------|-----------------|-------------------------|-----------------|-----------------|--------------------------------------------|
| S99     | 6772412     | SMoV  | SMoV_RNA2B | 56           | 0.001           | 2.3                     | 94.6            | 0               | 0.0                                        |

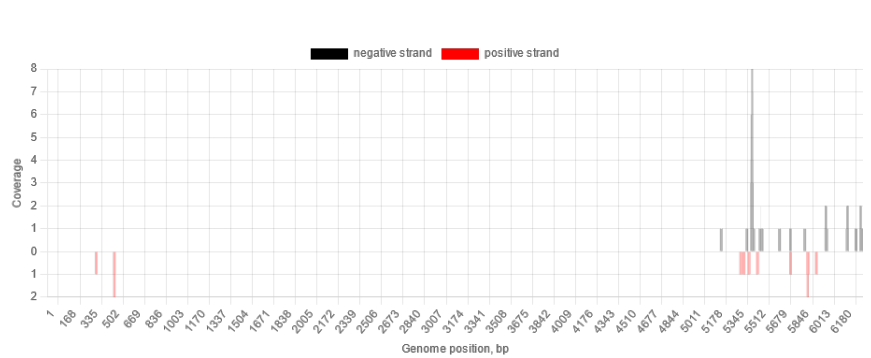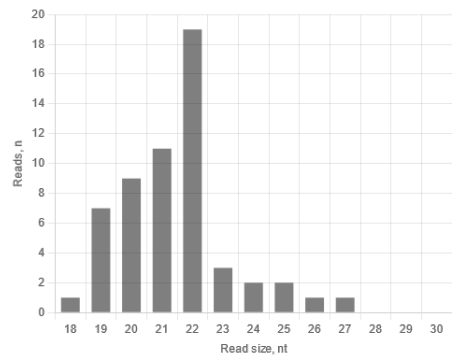

Mapping coverage of **all reads** matching SMoV\_RNA2B (33 reads)

Length distribution of the reads

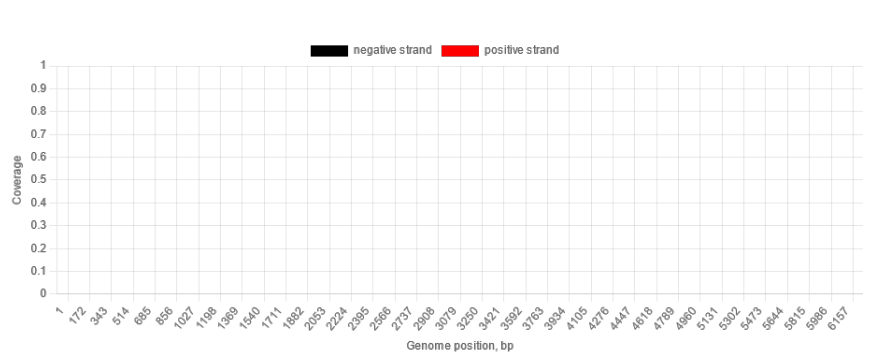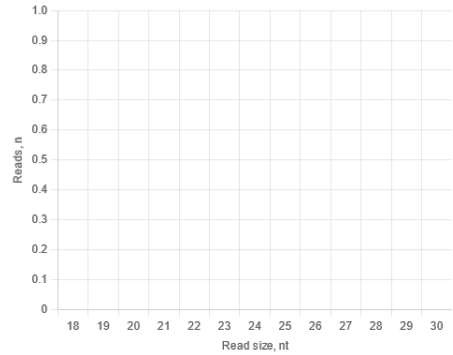

Mapping coverage of SMoV\_RNA2B **specific reads** (0 reads)

Length distribution of the reads

| Dataset | Input reads | Virus | Reference  | Mapped reads | Mapped reads, % | Forward/Reverse balance | Nonredundant, % | Strain specific | Strain specific, % from total mapped reads |
|---------|-------------|-------|------------|--------------|-----------------|-------------------------|-----------------|-----------------|--------------------------------------------|
| S99     | 6772412     | SMoV  | SMoV_RNA2C | 236          | 0.003           | 1.4                     | 85.6            | 76              | 32.2                                       |

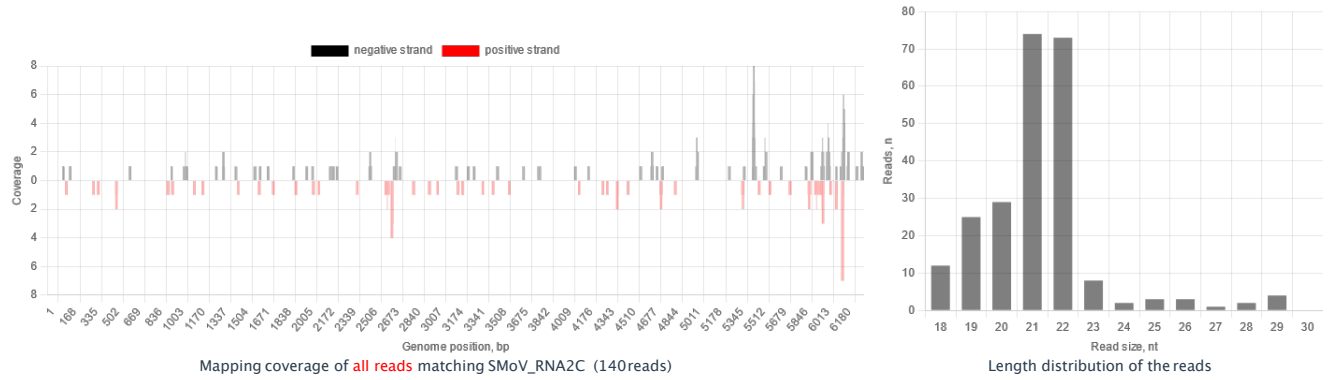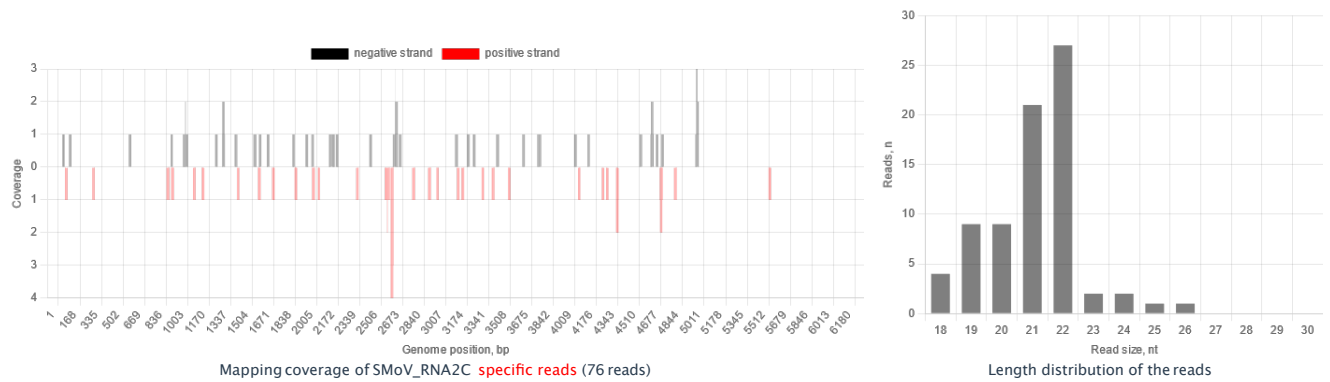

| Dataset | Input reads | Virus | Reference | Mapped reads | Mapped reads, % | Forward/Reverse balance | Nonredundant, % | Strain specific | Strain specific, % from total mapped reads |
|---------|-------------|-------|-----------|--------------|-----------------|-------------------------|-----------------|-----------------|--------------------------------------------|
| S99     | 6772412     | StrV1 | StrV1_A   | 268          | 0.004           | 0.5                     | 60.4            | 11985           | 4472.0                                     |

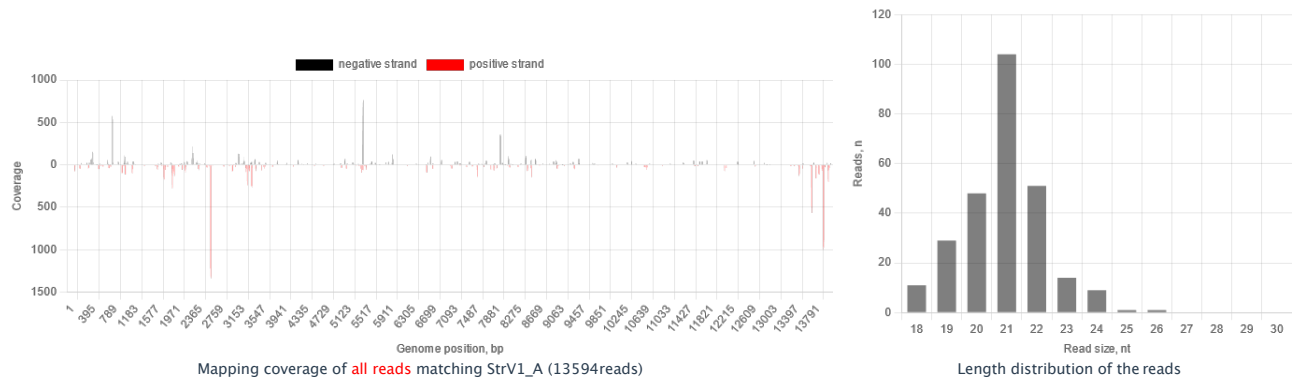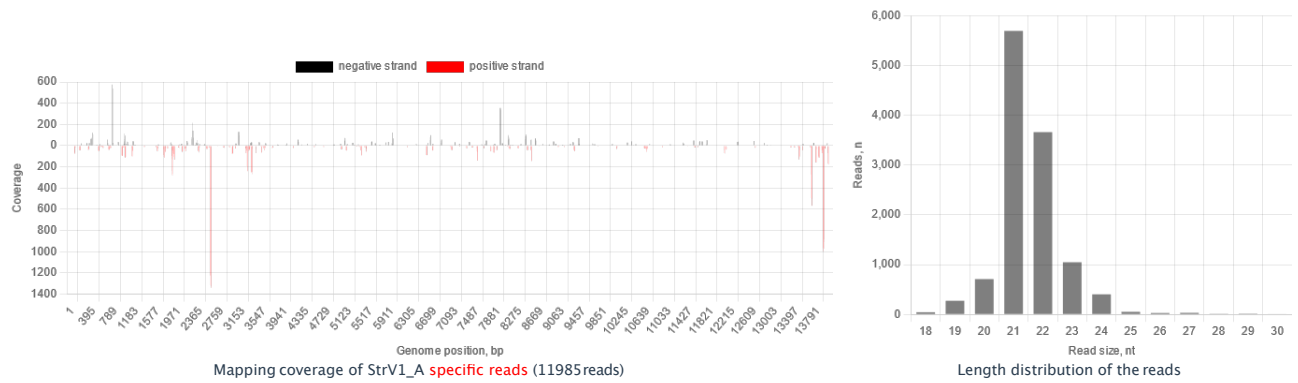

| Dataset | Input reads | Virus | Reference | Mapped reads | Mapped reads, % | Forward/Reverse balance | Nonredundant, % | Strain specific | Strain specific, % from total mapped reads |
|---------|-------------|-------|-----------|--------------|-----------------|-------------------------|-----------------|-----------------|--------------------------------------------|
| S99     | 6772412     | StrV1 | StrV1_B   | 8361         | 0.123           | 1.2                     | 45.6            | 13356           | 159.7                                      |

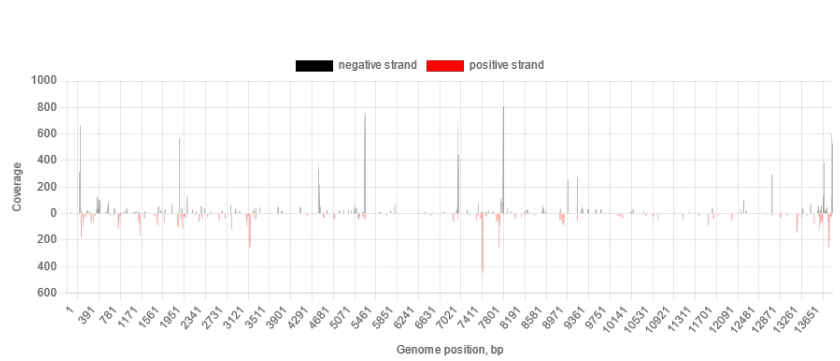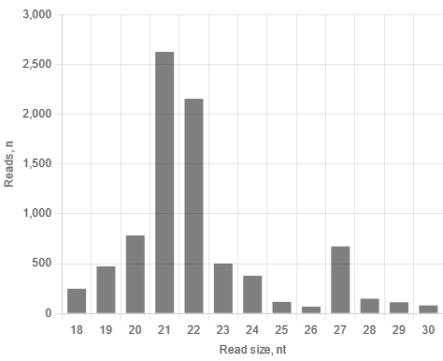

Mapping coverage of **all reads** matching StrV1\_B (14411reads)

Length distribution of the reads

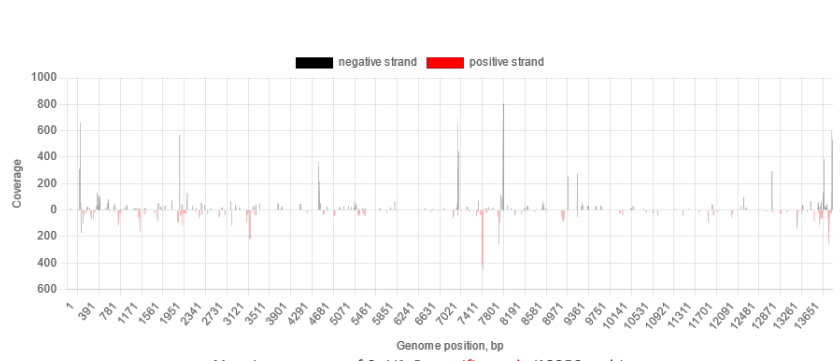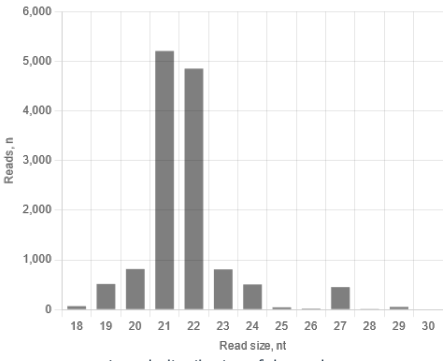

Mapping coverage of StrV1\_B **specific reads** (13356reads)

Length distribution of the reads

| Dataset | Input reads | Virus | Reference  | Mapped reads | Mapped reads, % | Forward/Reverse balance | Nonredundant, % | Strain specific | Strain specific, % from total mapped reads |
|---------|-------------|-------|------------|--------------|-----------------|-------------------------|-----------------|-----------------|--------------------------------------------|
| S99     | 6772412     | StrV1 | StrV1_C150 | 0.002        | 0.5             | 54.0                    | 60              | 40.0            |                                            |

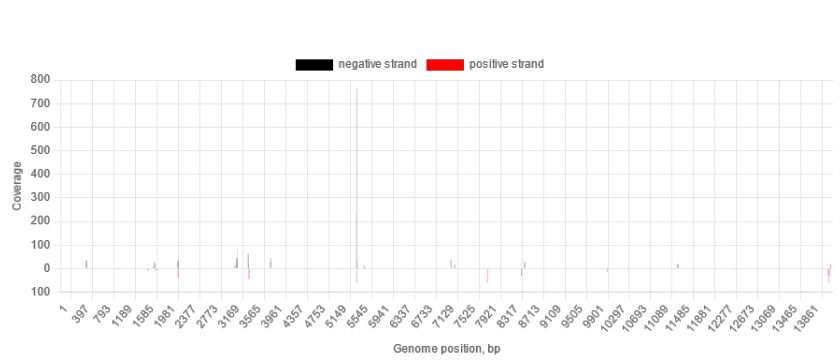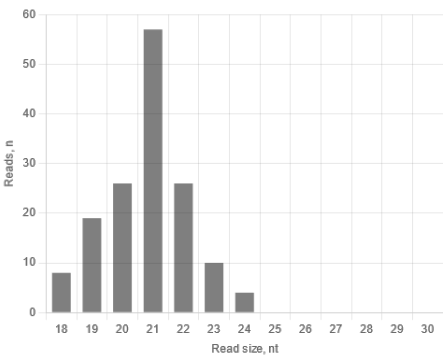

Mapping coverage of **all reads** matching StrV1\_C (1549reads)

Length distribution of the reads

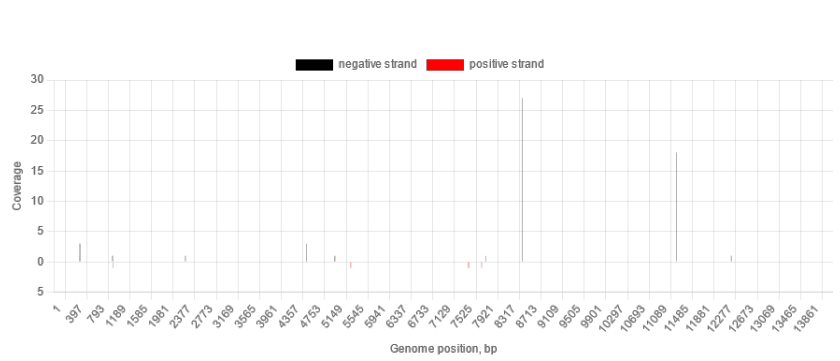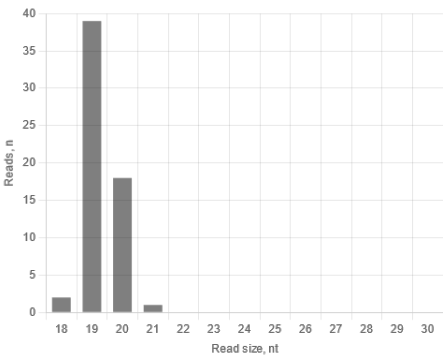

Mapping coverage of StrV1\_C **specific reads** (60 reads)

Length distribution of the reads
