# Supplementary material for: Analysis of Virus-Derived siRNAs in Strawberry Plants Co-Infected with Multiple Viruses and Their Genotypes
Source: Plants (Basel). 2023 Jul 6;12(13):2564. doi: 10.3390/plants12132564 (PMC10346599; doi:10.3390/plants12132564)
Supplement: Supplementary file 1 [file plants-12-02564-s001.zip]

Archive with 4 entries (4 files):
- Figure S1.pdf
- Figure S2.pdf
- Figure S3.pdf
- Supplementary Tables_R1v230602.xlsx
