# Supplementary material for: Analysis of Virus-Derived siRNAs in Strawberry Plants Co-Infected with Multiple Viruses and Their Genotypes
Source: Plants (Basel). 2023 Jul 6;12(13):2564. doi: 10.3390/plants12132564 (PMC10346599; doi:10.3390/plants12132564)
Supplement: Supplementary file 1 [file plants-12-02564-s001.zip › Supplementary Tables_R1v230602.xlsx]

## Sheet: Summary of STables
Supplementary material for
Analysis of strawberry response to mixed infection with multiple viruses and genotypes
Igor Koloniuk1*, Alena Matyášová1, Sára Brázdová1,2, Jana Veselá1, Jaroslava Přibylová1, Eva Várallyay3, Jana Fránová1
*Correspondence: koloniuk@umbr.cas.cz (I.K.)
Table S1: Overview of mapped reads to viral references: strawberry crinkle virus (SCV), strawberry mottle virus (SMoV), and strawberry virus 1 (StrV1). Background grey shade highlights cases with confirmed RT-qPCR detection. Detailed mapping data are enclosed in a tab "Table S1-detailed view". NA - not applicable
Table S2: Overview of Cq (Table S2a), ∆Cq (Table S2b) and fold difference values (Table S2c) between viral targets and endogenous references
Table S3: List of primers used in the study

## Sheet: Table S1
	Table S1: Overview of mapped reads to viral references: strawberry crinkle virus (SCV), strawberry mottle virus (SMoV), and strawberry virus 1 (StrV1). Background grey shade highlights cases with confirmed RT-qPCR detection. Detailed mapping data are enclosed in a tab "Table S1-detailed view". NA - not applicable
	Plant	Library/Dataset	Viruses detected	Sum of all viral reads per dataset, n	Strain specific reads, n	Strain specific %	SCV	SCV	SMoV	SMoV	SMoV	SMoV	SMoV	SMoV	StrV1	StrV1	StrV1
							A	B	1A	1B	1C	2A	2B	2C	A	B	C
	1_B	1B_1	SMoV1A,B,C; SMoV2A,B,C; SCVA,b; StrV1A,B,C	80165	49746	62.0545	7814	8134	10871	10125	10639	7149	6150	9549	2694	5882	1158
		1B_2		47143	26922	57.1071	1523	1046	7716	7121	7443	5073	4059	5894	1710	4273	1285
		1B-3		46391	24693	53.228	2547	1365	7320	6864	7087	5056	4160	5989	1141	4198	664
		1B-4		52312	30550	58.3996	7011	3462	7216	6561	6708	4865	4184	6262	1376	3560	1107
	2_A	2A_2	SMoV1A,B,C; SMoV2A,B,C; SCVA,b; StrV1A,B,C	87524	61738	70.5384	13189	10814	7992	7155	7767	4719	4073	6073	7722	12995	5025
		2A_3		85552	61295	71.6465	10906	10718	7497	6494	7238	4309	4178	5810	7704	16466	4232
		2A_4		51535	35413	68.7164	5649	4337	6062	5372	5813	3808	3090	4626	3009	8341	1428
	3K	3K_1	SMoV1A,B,C; SMoV2A,B,C; SCVA,B; StrV1A,B,C	68798	46309	67.3115	9737	6588	8455	7511	8226	5328	4406	6056	2859	7267	2365
		3K_2		77535	53687	69.2423	11218	7197	9058	7667	8292	5438	4696	6121	3940	11149	2759
		3K_3		58144	40760	70.1018	13890	6567	5642	5082	5308	3527	3053	4212	2437	6422	2004
		3K_4		87123	60778	69.7611	16741	11607	9272	8175	8838	5487	4859	6716	3980	8719	2729
	Fv_StrV1AB	S101	StrV1A,B	30167	NA	86	NA	NA	73	103	137	127	33	140	13594	14411	1549
	Fv_StrV1_B	S99	StrV1B	9815	NA	NA	NA	NA	132	176	246	190	56	236	268	8361	150
		S108		11080	NA	NA	1	3	199	133	178	154	85	239	201	9775	112
		S107		15482	NA	NA	1	2	298	206	404	319	124	373	256	13321	178
	Fv_StrV1_A	S95	StrV1A	23106	NA	NA	NA	NA	168	80	88	158	27	113	19940	358	2174
		S98		19745	NA	NA	NA	NA	270	418	481	418	132	537	15033	470	1986
	Fv-SMoV_BC_AC-1	S1	SMoV1B,C; SMoV2A,C	24884	NA	NA	NA	NA	2553	4259	6533	4707	1338	5494	NA	NA	NA
		S2		15253	NA	NA	NA	NA	1629	3340	3288	3285	896	2815	NA	NA	NA
	Fv-SMoV_BC_AC-2	S3	SMoV1B,C; SMoV2A,C	7162	NA	NA	NA	NA	784	1426	1665	1493	416	1378	NA	NA	NA
		S4		25886	NA	NA	NA	NA	2763	5012	6659	4572	1373	5507	NA	NA	NA
		S92		44002	NA	NA	NA	NA	4093	9598	10078	6763	2170	11300	NA	NA	NA

## Sheet: Table S1-detailed view
	Table S1: Detailed representation of mapped reads to viral references: strawberry crinkle virus (SCV), strawberry mottle virus (SMoV), and strawberry virus 1 (StrV1).
	Plant	Dataset	Total trimmed reads used for mapping, mil, n	Virus	Strain	qPCR detection	Sum of all viral reads per dataset, n	Virus-specific reads				Variant-specific reads
								viral count, n	of total (H column), %	count, n	of total (H column), %	count, n	of the virus mapped reads (K column), %	of total viruses' mapped reads (H column)
	1B	1B_1	10	SCV	A	+	80165	15948	19.894	7814	9.7474	6504	83.2	8.11327
					B	+				8134	10.1466	6824	83.9	8.51244
				SMoV	1A	+		31635	39.4624	10871	13.5608	5469	50.3	6.82218
					1B	+				10125	12.6302	4704	46.5	5.8679
					1C	+				10639	13.2714	5248	49.3	6.5465
					2A	+		22848	28.5012	7149	8.91786	4714	65.9	5.88037
					2B	+				6150	7.67168	3027	49.2	3.77596
					2C	+				9549	11.9117	4485	47	5.59471
				StrV1	A	+		9734	12.1425	2694	3.36057	2267	84.1	2.82792
					B	+				5882	7.33737	5741	97.6	7.16148
					C	+				1158	1.44452	763	65.9	0.951787
		1B_2	10	SCV	A	+	47143	2569	5.44938	1523	3.2306	1308	85.9	2.77454
		1B_2			B	+				1046	2.21878	831	79.4	1.76272
		1B_2		SMoV	1A	+		22280	47.2605	7716	16.3672	3931	50.9	8.33846
		1B_2			1B	+				7121	15.1051	3323	46.7	7.04877
		1B_2			1C	+				7443	15.7881	3634	48.8	7.70846
		1B_2			2A	+		15026	31.8732	5073	10.7609	3311	65.3	7.02331
		1B_2			2B	+				4059	8.60997	1844	45.4	3.9115
		1B_2			2C	+				5894	12.5024	2233	37.9	4.73665
		1B_2		StrV1	A	+		7268	15.4169	1710	3.62726	1382	80.8	2.93151
		1B_2			B	+				4273	9.06391	4119	96.4	8.73725
		1B_2			C	+				1285	2.72575	1006	78.3	2.13393
		1B_3	10	SCV	A	+	46391	3912	8.43267	2547	5.49029	2244	88.1	4.83715
		1B_3			B	+				1365	2.94238	1062	77.8	2.28924
		1B_3		SMoV	1A	+		21271	45.8516	7320	15.7789	3274	44.7	7.0574
		1B_3			1B	+				6864	14.796	2783	40.5	5.99901
		1B_3			1C	+				7087	15.2767	3001	42.3	6.46893
		1B_3			2A	+		15205	32.7758	5056	10.8987	3157	62.4	6.8052
		1B_3			2B	+				4160	8.96726	1619	38.9	3.4899
		1B_3			2C	+				5989	12.9098	2106	35.2	4.53967
		1B_3		StrV1	A	+		6003	12.94	1141	2.45953	903	79.1	1.9465
		1B_3			B	+				4198	9.04917	4112	98	8.86379
		1B_3			C	+				664	1.43131	432	65.1	0.931215
		1B_4	10	SCV	A	+	52312	10473	20.0203	7011	13.4023	6236	88.9	11.9208
		1B_4			B	+				3462	6.61798	2687	77.6	5.13649
		1B_4		SMoV	1A	+		20485	39.1593	7216	13.7942	3404	47.2	6.50711
		1B_4			1B	+				6561	12.5421	2743	41.8	5.24354
		1B_4			1C	+				6708	12.8231	2781	41.5	5.31618
		1B_4			2A	+		15311	29.2686	4865	9.29997	2881	59.2	5.50734
		1B_4			2B	+				4184	7.99816	1874	44.8	3.58235
		1B_4			2C	+				6262	11.9705	2561	40.9	4.89563
		1B_4		StrV1	A	+		6043	11.5518	1376	2.63037	1089	79.1	2.08174
		1B_4			B	+				3560	6.80532	3471	97.5	6.63519
		1B_4			C	+				1107	2.11615	823	74.3	1.57325
	2A	2A_2	10	SCV	A	+	87524	24003	27.4245	13189	15.069	11245	85.3	12.8479
		2A_2			B	+				10814	12.3555	8870	82	10.1344
		2A_2		SMoV	1A	+		22914	26.1802	7992	9.13121	4257	53.3	4.86381
		2A_2			1B	+				7155	8.1749	3443	48.1	3.93378
		2A_2			1C	+				7767	8.87414	4015	51.7	4.58731
		2A_2			2A	+		14865	16.9839	4719	5.39166	3172	67.2	3.62415
		2A_2			2B	+				4073	4.65358	2198	54	2.51131
		2A_2			2C	+				6073	6.93867	2588	42.6	2.9569
		2A_2		StrV1	A	+		25742	29.4114	7722	8.82272	6044	78.3	6.90553
		2A_2			B	+				12995	14.8474	12448	95.8	14.2224
		2A_2			C	+				5025	5.74128	3458	68.8	3.95092
		2A_3	10	SCV	A	+	85552	21624	25.2759	10906	12.7478	9066	83.1	10.5971
		2A_3			B	+				10718	12.5281	8878	82.8	10.3773
		2A_3		SMoV	1A	+		21229	24.8141	7497	8.76309	4016	53.6	4.69422
		2A_3			1B	+				6494	7.59071	3102	47.8	3.62586
		2A_3			1C	+				7238	8.46035	3773	52.1	4.41018
		2A_3			2A	+		14297	16.7115	4309	5.0367	2675	62.1	3.12675
		2A_3			2B	+				4178	4.88358	2255	54	2.63582
		2A_3			2C	+				5810	6.79119	2620	45.1	3.06246
		2A_3		StrV1	A	+		28402	33.1985	7704	9.00505	6194	80.4	7.24004
		2A_3			B	+				16466	19.2468	15845	96.2	18.5209
		2A_3			C	+				4232	4.9467	2871	67.8	3.35585
		2A_4	10	SCV	A	+	51535	9986	19.3771	5649	10.9615	4819	85.3	9.35093
		2A_4			B	+				4337	8.41564	3507	80.9	6.80508
		2A_4		SMoV	1A	+		17247	33.4666	6062	11.7629	3343	55.1	6.48685
		2A_4			1B	+				5372	10.424	2681	49.9	5.20229
		2A_4			1C	+				5813	11.2797	3079	53	5.97458
		2A_4			2A	+		11524	22.3615	3808	7.38915	2649	69.6	5.1402
		2A_4			2B	+				3090	5.99593	1655	53.6	3.21141
		2A_4			2C	+				4626	8.97642	2138	46.2	4.14864
		2A_4		StrV1	A	+		12778	24.7948	3009	5.83875	2460	81.8	4.77345
		2A_4			B	+				8341	16.1851	8163	97.9	15.8397
		2A_4			C	+				1428	2.77093	919	64.4	1.78325
	3K	3K_1	10	SCV	A	+	68798	16325	23.7289	9737	14.153	8443	86.7	12.2722
		3K_1			B	+				6588	9.57586	5294	80.4	7.69499
		3K_1		SMoV	1A	+		24192	35.1638	8455	12.2896	4731	56	6.87665
		3K_1			1B	+				7511	10.9175	3850	51.3	5.59609
		3K_1			1C	+				8226	11.9567	4522	55	6.57287
		3K_1			2A	+		15790	22.9512	5328	7.74441	3543	66.5	5.14986
		3K_1			2B	+				4406	6.40426	2383	54.1	3.46376
		3K_1			2C	+				6056	8.80258	2702	44.6	3.92744
		3K_1		StrV1	A	+		12491	18.1561	2859	4.15564	2149	75.2	3.12364
		3K_1			B	+				7267	10.5628	6971	95.9	10.1326
		3K_1			C	+				2365	3.4376	1721	72.8	2.50153
		3K_2	10	SCV	A	+	77535	18415	23.7506	11218	14.4683	9671	86.2	12.4731
		3K_2			B	+				7197	9.28226	5650	78.5	7.28703
		3K_2		SMoV	1A	+		25017	32.2654	9058	11.6825	5190	57.3	6.69375
		3K_2			1B	+				7667	9.88844	3899	50.9	5.0287
		3K_2			1C	+				8292	10.6945	4427	53.4	5.70968
		3K_2			2A	+		16255	20.9647	5438	7.01361	3676	67.6	4.74108
		3K_2			2B	+				4696	6.05662	2633	56.1	3.39589
		3K_2			2C	+				6121	7.8945	2694	44	3.47456
		3K_2		StrV1	A	+		17848	23.0193	3940	5.08158	3126	79.3	4.03173
		3K_2			B	+				11149	14.3793	10753	96.4	13.8686
		3K_2			C	+				2759	3.55839	1968	71.3	2.53821
		3K_3	10	SCV	A	+	58144	20457	35.1833	13890	23.889	12324	88.7	21.1957
		3K_3			B	+				6567	11.2944	5001	76.2	8.60106
		3K_3		SMoV	1A	+		16032	27.5729	5642	9.70349	3048	54	5.24216
		3K_3			1B	+				5082	8.74037	2565	50.5	4.41146
		3K_3			1C	+				5308	9.12906	2723	51.3	4.6832
		3K_3			2A	+		10792	18.5608	3527	6.06597	2177	61.7	3.74415
		3K_3			2B	+				3053	5.25076	1541	50.5	2.65032
		3K_3			2C	+				4212	7.24408	1921	45.6	3.30387
		3K_3		StrV1	A	+		10863	18.6829	2437	4.19132	1864	76.5	3.20583
		3K_3			B	+				6422	11.045	6180	96.2	10.6288
		3K_3			C	+				2004	3.44662	1416	70.7	2.43533
		3K_4	10	SCV	A	+	87123	28348	32.5379	16741	19.2154	14585	87.1	16.7407
		3K_4			B	+				11607	13.3225	9451	81.4	10.8479
		3K_4		SMoV	1A	+		26285	30.17	9272	10.6424	5100	55	5.85379
		3K_4			1B	+				8175	9.38329	4092	50.1	4.69681
		3K_4			1C	+				8838	10.1443	4684	53	5.37631
		3K_4			2A	+		17062	19.5838	5487	6.29799	3543	64.6	4.06666
		3K_4			2B	+				4859	5.57717	2674	55	3.06922
		3K_4			2C	+				6716	7.70864	2968	44.2	3.40668
		3K_4		StrV1	A	+		15428	17.7083	3980	4.56825	3241	81.4	3.72003
		3K_4			B	+				8719	10.0077	8393	96.3	9.63351
		3K_4			C	+				2729	3.13235	2047	75	2.34955
	Fv_StrV1AB	S101	10	SMoV	1A	-	30167	313	1.03756	73	0.241986	11	15.1	0.0364637
		S101			1B	-				103	0.341433	39	37.9	0.12928
		S101			1C	-				137	0.454139	73	53.3	0.241986
		S101			2A	-		300	0.994464	127	0.42099	87	68.5	0.288395
		S101			2B	-				33	0.109391	0	0	0
		S101			2C	-				140	0.464083	76	54.3	0.251931
		S101		StrV1	A	+		29554	97.968	13594	45.0625	11985	88.2	39.7288
		S101			B	+				14411	47.7707	13356	92.7	44.2735
		S101			C	-				1549	5.13475	60	3.9	0.198893
	Fv_StrV1_B	S99	6.77241	SMoV	1A	-	9815	554	5.64442	132	1.34488	30	22.7	0.305655
					1B	-				176	1.79317	68	38.6	0.692817
					1C	-				246	2.50637	142	57.7	1.44677
					2A	-		482	4.91085	190	1.93581	134	70.5	1.36526
					2B	-				56	0.570555	1	1.8	0.0101885
					2C	-				236	2.40448	135	57.2	1.37545
				StrV1	A	-		8779	89.4447	268	2.73051	76	28.4	0.774325
					B	+				8361	85.1859	8137	97.3	82.9037
					C	-				150	1.52827	3	2	0.0305655
	Fv_StrV1_B	S107	10	SCV	A	-	15482	3	0.0193773	1	0.00645911	1	100	0.00645911
		S107			B	-				2	0.0129182	2	100	0.0129182
		S107		SMoV	1A	-		908	5.86488	298	1.92482	122	40.9396	0.788012
		S107			1B	-				206	1.33058	34	16.5049	0.21961
		S107			1C	-				404	2.60948	231	57.1782	1.49206
		S107			2A	-		816	5.27064	319	2.06046	249	78.0564	1.60832
		S107			2B	-				124	0.80093	33	26.6129	0.213151
		S107			2C	-				373	2.40925	207	55.496	1.33704
		S107		StrV1	A	-		13755	88.8451	256	1.65353	17	6.64062	0.109805
		S107			B	+				13321	86.0419	12998	97.5753	83.9556
		S107			C	-				178	1.14972	4	2.24719	0.0258365
	Fv_StrV1_B	S108	10	SCV	A	-	11080	4	0.0361011	1	0.00902527	1	100	0.00902527
		S107			B	-				3	0.0270758	2	100	0.0180505
		S107		SMoV	1A	-		510	4.60289	199	1.79603	122	40.9	1.10108
		S107			1B	-				133	1.20036	34	16.5	0.306859
		S107			1C	-				178	1.6065	231	57.2	2.08484
		S107			2A	-		478	4.31408	154	1.38989	249	78.1	2.24729
		S107			2B	-				85	0.767148	33	26.6	0.297834
		S107			2C	-				239	2.15704	207	55.5	1.86823
		S107		StrV1	A	-		10088	91.0469	201	1.81408	17	6.6	0.15343
		S107			B	+				9775	88.222	12998	97.6	117.31
		S107			C	-				112	1.01083	4	2.2	0.0361011
	Fv_StrV1_A	S95	10	SMoV	1A	-	23106	336	1.45417	168	0.727084	110	65.5	0.476067
					1B	-				80	0.34623	23	28.7	0.0995412
					1C	-		273		88	0.380853	30	34.1	0.129836
					2A	-		298	1.28971	158	0.683805	122	77.2	0.528001
					2B	-				27	0.116853	0	0	0
					2C	-		20411		113	0.48905	58	51.3	0.251017
				StrV1	A	+		22472	97.2561	19940	86.2979	17599	88.3	76.1664
					B	-				358	1.54938	17	4.7	0.073574
					C	-		2862		2174	9.40881	48	2.2	0.207738
	Fv_StrV1_A	S98	9.90124	SMoV	1A	-	19745	1169	5.92049	270	1.36743	37	13.7	0.187389
		S98			1B	-				418	2.11699	178	42.6	0.901494
		S98			1C	-				481	2.43606	244	50.7	1.23576
		S98			2A	-		1087	5.50519	418	2.11699	291	69.6	1.47379
		S98			2B	-				132	0.668524	4	3	0.0202583
		S98			2C	-				537	2.71968	310	57.7	1.57002
		S98		StrV1	A	+		17489	88.5743	15033	76.1357	12892	85.8	65.2925
		S98			B	-				470	2.38035	137	29.1	0.693847
		S98			C	-				1986	10.0582	31	1.6	0.157002
	Fv-SMoV_BC_AC-1	S1	10	SMoV	1A	-	24884	13345	53.6288	2553	10.2596	5	0.2	0.0200932
		S1			1B	+				4259	17.1154	1654	38.8	6.64684
		S1			1C	+				6533	26.2538	3924	60.1	15.7692
		S1			2A	+		11539	46.3712	4707	18.9158	3373	71.7	13.5549
		S1			2B	-				1338	5.37695	22	1.6	0.0884102
		S1			2C	+				5494	22.0784	3052	55.6	12.2649
		S2	10	SMoV	1A	-	15253	8257	54.1336	1629	10.6799	0	0	0
		S2			1B	+				3340	21.8973	1636	49	10.7258
		S2			1C	+				3288	21.5564	1631	49.6	10.693
		S2			2A	+		6996	45.8664	3285	21.5367	2374	72.3	15.5642
		S2			2B	-				896	5.87425	13	1.5	0.0852291
		S2			2C	+				2815	18.4554	1228	43.6	8.05088
	Fv-SMoV_BC_AC-2	S3	10	SMoV	1A	-	7162	3875	54.105	784	10.9467	0	0	0
		S3			1B	+				1426	19.9106	615	43.1	8.58699
		S3			1C	+				1665	23.2477	866	52	12.0916
		S3			2A	+		3287	45.895	1493	20.8461	1072	71.8	14.9679
		S3			2B	-				416	5.80843	5	1.2	0.0698129
		S3			2C	+				1378	19.2404	636	46.2	8.8802
		S4	10	SMoV	1A	-	25886	14434	55.7599	2763	10.6737	2	0.1	0.00772618
		S4			1B	+				5012	19.3618	2185	43.6	8.44086
		S4			1C	+				6659	25.7243	3839	57.7	14.8304
		S4			2A	+		11452	44.2401	4572	17.6621	3231	70.7	12.4817
		S4			2B	-				1373	5.30403	26	1.9	0.10044
		S4			2C	+				5507	21.274	2842	51.6	10.9789
	Fv-SMoV_BC_AC-2	S92	10	SMoV	1A	-	44002	23769	54.018	4093	9.30185	34	0.8	0.0772692
		S92			1B	+				9598	21.8126	5371	56	12.2063
		S92			1C	+				10078	22.9035	5961	59.1	13.5471
		S92			2A	+		20233	45.982	6763	15.3698	4871	72	11.07
		S92			2B	-				2170	4.93159	36	1.7	0.0818145
		S92			2C	+				11300	25.6807	7236	64	16.4447

## Sheet: Table S2
	Table S2: Overview of Cq (Table S2a), ∆Cq (Table S2b) and fold difference values (Table S2c) between viral targets and endogenous references.
	Plant	Corresponding dataset	Endogenous controls					Viral targets
							Geometric mean
			Atropa	DBH	HISTH4	PIRUV		SCV-A	SCV-B	SMoV RNA1A	SMoV RNA1B	SMoV RNA1C	SMoV RNA2A	SMoV RNA2B	SMoV RNA2C	StrV-1A	StrV-1B	StrV-1C
	1B	1B1	NA	26.791	29.4182	30.5214	28.876	28.7205	28.8368	27.5586	28.9085	27.2674	26.2327	25.2492	26.8856	31.6435	29.4349	32.4367
		1B2	NA	27.6645	27.8561	32.2466	28.876	30.719	30.1424	29.9743	31.4506	30.3969	28.4552	28.0748	29.2552	31.9671	30.4727	33.4764
		1B3	NA	27.0318	29.6682	31.1989	28.876	30.168	29.1218	28.1647	29.8139	28.6241	26.2276	26.0215	27.7651	31.5382	29.7897	33.5293
		1B4	NA	26.4534	30.3055	30.688	28.876	31.1653	30.9511	28.8026	30.3303	29.1046	26.4444	26.8119	27.5143	32.7377	31.7039	35.0877
	2A	2A2	NA	25.995	29.4193	30.5784	28.876	29.9281	29.9229	29.7803	31.2077	30.186	27.0525	26.4904	27.8139	31.4999	30.6192	32.1479
		2A3	NA	26.1564	29.4936	30.9921	28.876	29.9285	30.0005	28.0449	29.1541	28.2016	25.8387	25.911	27.0272	31.8335	30.2616	34.2593
		2A4	NA	26.293	29.0298	30.8756	28.876	30.1555	30.0529	27.0891	28.1273	27.1151	24.6058	25.0434	25.1659	31.2408	30.3578	33.1476
	3K	3K1	NA	25.9635	28.7677	30.6905	28.876	30.2767	30.4487	27.0558	28.2445	27.4235	25.3727	25.0353	25.629	31.0083	29.9482	32.2675
		3K2	NA	26.0749	28.868	30.8538	28.876	31.0815	30.4669	27.2261	28.1799	26.9055	24.8518	25.1462	25.3453	31.0897	29.7679	34.1514
		3K3	NA	26.6796	29.7302	30.9083	28.876	31.9063	33.0673	26.9365	27.2153	26.5581	25.3154	25.4945	25.8592	30.703	30.301	33.1748
		3K4	NA	25.8769	29.6965	28.8642	28.876	31.4045	30.4601	26.7239	27.6547	26.6878	25.2328	25.6146	25.8961	31.4132	30.4093	33.2045
	Fv-SMoV_BC_AC-1	S1	22.7236	28.0529	28.8779	29.3448	28.7536	ND	ND	ND	36.0796	26.404	25.1931	ND	26.8969	ND	ND	ND
		S2	24.074	29.6848	30.2257	31.4989	30.4604	ND	ND	ND	36.6867	28.7287	26.7263	ND	27.7535	ND	ND	ND
	Fv-SMoV_BC_AC-2	S3	23.0992	28.3338	29.8534	28.8718	29.0129	ND	ND	ND	33.9813	25.0804	24.1088	ND	25.6086	ND	ND	ND
		S4	23.5692	28.9733	29.5996	30.3998	29.6518	ND	ND	ND	35.4378	27.1476	25.5564	ND	27.3915	ND	ND	ND
		S92	23.7331	29.5721	29.997	30.136	29.9007	ND	ND	ND	35.2676	25.26	25.0391	ND	26.6512	ND	ND	ND
	Table S2b	Calculated ∆Cq between Cq geometric mean of endogenous controls and Cq of viral references
	Plant	Corresponding dataset	Viral reference
			SCV-A	SCV-B	SMoV RNA1A	SMoV RNA1B	SMoV RNA1C	SMoV RNA2A	SMoV RNA2B	SMoV RNA2C	StrV-1A	StrV-1B	StrV-1C
	1B	1B1	0.155431	0.0391652	1.31737	-0.0325055	1.60859	2.6433	3.62676	1.9904	-2.7675	-0.558943	-3.56075
		1B2	-1.84302	-1.26643	-1.0983	-2.57463	-1.52088	0.420781	0.801161	-0.379225	-3.09109	-1.59673	-4.60046
		1B3	-1.29207	-0.24584	0.711314	-0.93797	0.251917	2.64833	2.85447	1.11085	-2.66227	-0.913698	-4.65332
		1B4	-2.28932	-2.07515	0.0733653	-1.45434	-0.228664	2.4316	2.06411	1.36167	-3.86171	-2.8279	-6.21176
	2A	2A2	-1.05215	-1.04688	-0.904352	-2.33174	-1.31002	1.82346	2.38559	1.06212	-2.62397	-1.74327	-3.27192
		2A3	-1.05258	-1.1245	0.831022	-0.278133	0.67437	3.03724	2.96495	1.84873	-2.95752	-1.3856	-5.3833
		2A4	-1.27952	-1.1769	1.78687	0.748679	1.76087	4.27013	3.83259	3.71006	-2.36486	-1.48183	-4.27165
	3K	3K1	-1.40073	-1.57276	1.82015	0.631479	1.45248	3.5033	3.84065	3.24693	-2.13235	-1.07221	-3.39153
		3K2	-2.20552	-1.59088	1.64986	0.696099	1.97045	4.02414	3.72974	3.53069	-2.21371	-0.891924	-5.27543
		3K3	-3.03036	-4.19133	1.93948	1.66064	2.3179	3.56055	3.3815	3.0168	-1.82703	-1.425	-4.29885
		3K4	-2.52854	-1.58415	2.15204	1.22125	2.18815	3.64319	3.26137	2.97984	-2.53726	-1.53332	-4.32856
	Fv-SMoV_BC_AC-1	S1				-6.17888	3.49677	4.70762		3.00385
		S2				-6.78598	1.172	3.17443		2.14723
	Fv-SMoV_BC_AC-2	S3				-4.08059	4.8203	5.79191		4.29211
		S4				-5.53705	2.75313	4.34428		2.50926
		S92				-5.36689	4.64074	4.86158		3.24957
	Table S2c	Calculated fold differences between endogenous controls and viral references
	Plant	Corresponding dataset	Viral reference
			SCV-A	SCV-B	SMoV RNA1A	SMoV RNA1B	SMoV RNA1C	SMoV RNA2A	SMoV RNA2B	SMoV RNA2C	StrV-1A	StrV-1B	StrV-1C
	1B	1B1	1.11202	1.0265	2.525	0.977248	3.02504	6.16535	13.51	3.89477	0.144845	0.686508	0.0910646
		1B2	0.283949	0.42923	0.461989	0.161552	0.35114	1.33583	1.77732	0.771786	0.115556	0.341464	0.0452365
		1B3	0.413702	0.84859	1.64892	0.514728	1.18929	6.18672	7.76055	2.13575	0.155888	0.540712	0.0436554
		1B4	0.209334	0.250111	1.05294	0.357106	0.854404	5.32956	4.40041	2.5349	0.0674752	0.149117	0.0152959
	2A	2A2	0.487374	0.497014	0.529487	0.191866	0.405972	3.50709	5.54264	2.06583	0.160111	0.3094	0.110602
		2A3	0.487234	0.471907	1.79372	0.82125	1.59051	8.08516	8.40106	3.53553	0.12685	0.393596	0.0267115
		2A4	0.417264	0.455679	3.51256	1.69909	3.35924	18.8861	15.6611	12.608	0.19186	0.368915	0.0564395
	3K	3K1	0.384108	0.349821	3.5957	1.56379	2.71693	11.1422	15.7521	9.18863	0.225673	0.486005	0.102048
		3K2	0.221666	0.345612	3.18996	1.637	3.88039	15.9451	14.5466	11.154	0.213212	0.548694	0.0287225
		3K3	0.126182	0.0608652	3.91042	3.2407	4.92846	11.59	11.3291	7.852	0.279288	0.383297	0.0554161
		3K4	0.177775	0.34717	4.54076	2.37427	4.50751	12.2681	10.3931	7.65625	0.170103	0.356352	0.0543189
	Fv-SMoV_BC_AC-1	S1				0.0161403	10.332	23.1938		7.43397
		S2				0.0107605	2.18736	8.33095		4.19537
	Fv-SMoV_BC_AC-2	S3				0.0655372	25.0066	47.8469		17.5735
		S4				0.0247779	6.28787	18.1966		5.34286
		S92				0.0277598	22.1807	25.7055		8.75967

## Sheet: Table S3
	Table S3: List of primers used in the study
	Primer name	sequence, 5'-3'	Target	qPCR amplification efficiency	Description	Reference
	2141	CAAGATTTGATTTTCCATGGGTAT	SCV_A	1.98	qPCR variant determination	1
	2139	ATGAACTGCAGGAGGAAGAT	SCV_A
	2058	TCAAAATCTGATTCTCCATAGGGA	SCV_B	1.95
	2056	ACAGGAAGAAAATGGTGATGACG	SCV_B
	2457	GGCATTAAAGATCCCATCAGCG	SMoV_RNA1A	2.02		this study
	2458	ACCTCATGTCTTCTAGAAAAAGTGG	SMoV_RNA1A
	2460	CCGGGAAAAGCTCTCTCTCA	SMoV_RNA1B	2.03
	2459	GCATGCCCAAAGCCTGTAC	SMoV_RNA1B
	2461	CATCATGTTTGATTTCGGCACTT	SMoV_RNA1C	1.99
	2462	GATCACCTCATGCCTCCTGG	SMoV_RNA1C
	2062	CAAAGCCTGTGTCGAAGTGG	SMoV_RNA2A	1.99
	2061	TGGGAAGTTGCTCCAGACAA	SMoV_RNA2A
	2063	ACAACTGTCTTGGGGATCT	SMoV_RNA2B	2.05
	2060	GAGGTTGCGCCAGACAACT	SMoV_RNA2B
	2059	TGGGAGGTAGCACCGGATAA	SMoV_RNA2C	1.98
	2064	GGAGTTGGTGGTATTGACAG	SMoV_RNA2C
	2071	TGCTCCCAGACAGAGACTCAGA	StrV1_A	2.01		1
	2068	CGAACGAACCATTTGATAGAAGAC	StrV1_A
	2073	TCCGCATTACTCAGAGGCA	StrV1_B	1.96
	2069	TCTTGCTGAGTCTGAACACCT	StrV1_B
	2070	GGTTCTCCATCTGCTTCGTA	StrV1_C	1.96
	2072	AGTAAGAGCATACCCACAGTACT	StrV1_C
	3247	CTAAATCTGTGAATGCGAATGAGG	pyruvate decarboxylase	1.92	endogenous control, AF141016.2	2
	3246	AGGTGCGTTGCGAAGAGGA	PIRUV - AF141016.2
	3245	CGGTTGTGTGACGCTGTCAT	DNA-binding protein	2.03	endogenous control, XM_004291635.2
	3244	TTGGCAGCGGGACTTTACC	DBP - XM_004291635.2		endogenous control
	3241	AGTGTCCTTCCCTGCCTCTT	histone H4	1.90	endogenous control, AB197150.1
	3240	TCAAGCGTATCTCCGGTCTC			endogenous control
	References
	1	Koloniuk, Igor, Alena Matyášová, Sára Brázdová, Jana Veselá, Jaroslava Přibylová, Jana Fránová, and Santiago F. Elena. 2022. “Transmission of Diverse Variants of Strawberry Viruses Is Governed by a Vector Species.” Viruses 14 (7): 1362. https://doi.org/10.3390/v14071362.
	2	Zhang, Yunting, Xiaorui Peng, Yi Liu, Yali Li, Ya Luo, Xiaorong Wang, and Haoru Tang. 2018. “Evaluation of Suitable Reference Genes for QRT-PCR Normalization in Strawberry (Fragaria × Ananassa) under Different Experimental Conditions.” BMC Molecular Biology 19 (1): 8. https://doi.org/10.1186/s12867-018-0109-4.
